# Supplementary material for: Integrated analysis of lncRNA–mRNA networks associated with an SLA titanium surface reveals the potential role of HIF1A-AS1 in bone remodeling
Source: Royal Society of Chemistry journal article supplement (doi:10.1039/d0ra01242d), 2020-01-01
Supplement: d0ra01242d1.xlsx [file d0ra01242d1.xlsx]

## Sheet: DEGs of mRNA
FC (abs) [S7] vs [G7]	FC [S7] vs [G7]	Log FC [S7] vs [G7]	Regulation [S7] vs [G7]	GeneSymbol	GeneName	Description	GenomicCoordinates	Cytoband
14.556	14.556	3.86354	up	MMP3	matrix metallopeptidase 3 (stromelysin 1, progelatinase)	Homo sapiens matrix metallopeptidase 3 (stromelysin 1, progelatinase) (MMP3), mRNA [NM_002422]	chr11:102706753-102706694	hs|11q22.2
12.4752	12.4752	3.64099	up	NPTX1	neuronal pentraxin I	Homo sapiens neuronal pentraxin I (NPTX1), mRNA [NM_002522]	chr17:78441076-78441017	hs|17q25.3
9.56975	9.56975	3.25848	up	SPP1	secreted phosphoprotein 1	Homo sapiens secreted phosphoprotein 1 (SPP1), transcript variant 1, mRNA [NM_001040058]	chr4:88903920-88903979	hs|4q22.1
9.35483	-9.35483	-3.22571	down	LAMP5	lysosomal-associated membrane protein family, member 5	Homo sapiens lysosomal-associated membrane protein family, member 5 (LAMP5), transcript variant 1, mRNA [NM_012261]	chr20:9511041-9511100	hs|20p12.2
8.73027	8.73027	3.12603	up	RRAD	Ras-related associated with diabetes	Homo sapiens Ras-related associated with diabetes (RRAD), transcript variant 2, mRNA [NM_004165]	chr16:66956234-66956175	hs|16q22.1
7.44105	7.44105	2.89551	up	TREM1	triggering receptor expressed on myeloid cells 1	Homo sapiens triggering receptor expressed on myeloid cells 1 (TREM1), transcript variant 1, mRNA [NM_018643]	chr6:41248727-41243938	hs|6p21.1
7.38157	7.38157	2.88393	up	THBD	thrombomodulin	Homo sapiens thrombomodulin (THBD), mRNA [NM_000361]	chr20:23026866-23026807	hs|20p11.21
6.96721	-6.96721	-2.80058	down	HOPX	HOP homeobox	Homo sapiens HOP homeobox (HOPX), transcript variant 2, mRNA [NM_139211]	chr4:57514502-57514443	hs|4q12
6.46699	-6.46699	-2.6931	down	SCUBE1	signal peptide, CUB domain, EGF-like 1	signal peptide, CUB domain, EGF-like 1 [Source:HGNC Symbol;Acc:HGNC:13441] [ENST00000360835]	chr22:43593387-43593328	hs|22q13.2
6.43922	6.43922	2.68688	up	SLC6A15	solute carrier family 6 (neutral amino acid transporter), member 15	Homo sapiens solute carrier family 6 (neutral amino acid transporter), member 15 (SLC6A15), transcript variant 1, mRNA [NM_182767]	chr12:85254418-85254359	hs|12q21.31
6.40362	-6.40362	-2.67889	down	CCKAR	cholecystokinin A receptor	Homo sapiens cholecystokinin A receptor (CCKAR), mRNA [NM_000730]	chr4:26483040-26483018	hs|4p15.2
6.28222	6.28222	2.65128	up	SLC6A15	solute carrier family 6 (neutral amino acid transporter), member 15	Homo sapiens solute carrier family 6 (neutral amino acid transporter), member 15 (SLC6A15), transcript variant 1, mRNA [NM_182767]	chr12:85266530-85266471	hs|12q21.31
6.18506	6.18506	2.62879	up	SERPINB2	serpin peptidase inhibitor, clade B (ovalbumin), member 2	Homo sapiens serpin peptidase inhibitor, clade B (ovalbumin), member 2 (SERPINB2), transcript variant 2, mRNA [NM_002575]	chr18:61570202-61570261	hs|18q21.33
5.54574	-5.54574	-2.47138	down	ARHGAP29	Rho GTPase activating protein 29	Homo sapiens Rho GTPase activating protein 29 (ARHGAP29), mRNA [NM_004815]	chr1:94634524-94634465	hs|1p22.1
5.5424	5.5424	2.47051	up	CXCL1	chemokine (C-X-C motif) ligand 1 (melanoma growth stimulating activity, alpha)	Homo sapiens chemokine (C-X-C motif) ligand 1 (melanoma growth stimulating activity, alpha) (CXCL1), transcript variant 1, mRNA [NM_001511]	chr4:74736850-74736909	hs|4q13.3
5.48724	5.48724	2.45608	up	SLC6A15	solute carrier family 6 (neutral amino acid transporter), member 15	Homo sapiens solute carrier family 6 (neutral amino acid transporter), member 15 (SLC6A15), transcript variant 2, mRNA [NM_018057]	chr12:85277583-85277524	hs|12q21.31
5.44179	5.44179	2.44408	up	CXCL6	chemokine (C-X-C motif) ligand 6	Homo sapiens chemokine (C-X-C motif) ligand 6 (CXCL6), mRNA [NM_002993]	chr4:74703368-74703427	hs|4q13.3
5.43552	5.43552	2.44242	up	IL33	interleukin 33	Homo sapiens interleukin 33 (IL33), transcript variant 1, mRNA [NM_033439]	chr9:6257372-6257431	hs|9p24.1
5.40717	5.40717	2.43487	up	LOC101928551	uncharacterized LOC101928551	Homo sapiens uncharacterized LOC101928551 (LOC101928551), long non-coding RNA [NR_125900]	chr4:175790585-175790644	hs|4q34.1
5.24047	-5.24047	-2.3897	down	LINC01503	long intergenic non-protein coding RNA 1503	Homo sapiens cDNA FLJ34873 fis, clone NT2NE2014950. [AK092192]	chr9:132099631-132099690	hs|9q34.11
5.15735	-5.15735	-2.36663	down	LOC100128035	VGSA5840	Homo sapiens clone DNA139632 VGSA5840 (UNQ5840) mRNA, complete cds. [AY358772]	chr3:111577447-111577388	hs|3q13.2
5.12875	-5.12875	-2.35861	down	C1orf220	chromosome 1 open reading frame 220	chromosome 1 open reading frame 220 [Source:HGNC Symbol;Acc:HGNC:33805] [ENST00000367638]	chr1:178514103-178514162	hs|1q25.2
5.1204	5.1204	2.35626	up	CXCL3	chemokine (C-X-C motif) ligand 3	Homo sapiens chemokine (C-X-C motif) ligand 3 (CXCL3), mRNA [NM_002090]	chr4:74902761-74902702	hs|4q13.3
5.07836	-5.07836	-2.34436	down	ACAN	aggrecan	Homo sapiens aggrecan (ACAN), transcript variant 2, mRNA [NM_013227]	chr15:89417771-89417830	hs|15q26.1
4.90563	4.90563	2.29444	up	ATP6V0D2	ATPase, H+ transporting, lysosomal 38kDa, V0 subunit d2	Homo sapiens ATPase, H+ transporting, lysosomal 38kDa, V0 subunit d2 (ATP6V0D2), mRNA [NM_152565]	chr8:87165305-87165364	hs|8q21.3
4.85274	-4.85274	-2.2788	down	SLC43A2	solute carrier family 43 (amino acid system L transporter), member 2	Homo sapiens solute carrier family 43 (amino acid system L transporter), member 2 (SLC43A2), transcript variant 2, mRNA [NM_152346]	chr17:1477761-1477702	hs|17p13.3
4.73256	4.73256	2.24262	up	lnc-RNF38-2	lnc-RNF38-2:1	UI-H-ED0-axo-o-05-0-UI.s1 NCI_CGAP_ED0 Homo sapiens cDNA clone IMAGE:5831644 3', mRNA sequence [BM997047]	chr9:36313603-36313544	hs|9p13.2
4.69363	4.69363	2.2307	up	lnc-ARRDC3-1	lnc-ARRDC3-1:6	LNCipedia lincRNA (lnc-ARRDC3-1), lincRNA [lnc-ARRDC3-1:6]	chr5:90603630-90603571	hs|5q14.3
4.63081	4.63081	2.21126	up	FAM129A	family with sequence similarity 129, member A	Homo sapiens family with sequence similarity 129, member A (FAM129A), mRNA [NM_052966]	chr1:184760286-184760227	hs|1q25.3
4.60627	-4.60627	-2.2036	down	SORCS2	sortilin-related VPS10 domain containing receptor 2	Homo sapiens sortilin-related VPS10 domain containing receptor 2 (SORCS2), mRNA [NM_020777]	chr4:7744241-7744300	hs|4p16.1
4.59923	4.59923	2.20139	up	GRAP2	GRB2-related adaptor protein 2	Homo sapiens GRB2-related adaptor protein 2 (GRAP2), transcript variant 3, mRNA [NM_004810]	chr22:40362073-40362132	hs|22q13.1
4.52357	4.52357	2.17746	up	DGKG	diacylglycerol kinase, gamma 90kDa	Homo sapiens diacylglycerol kinase, gamma 90kDa (DGKG), transcript variant 1, mRNA [NM_001346]	chr3:185865094-185865035	hs|3q27.2
4.42105	4.42105	2.14439	up	CD22	CD22 molecule	Homo sapiens CD22 molecule (CD22), transcript variant 1, mRNA [NM_001771]	chr19:35837555-35837614	hs|19q13.12
4.41411	-4.41411	-2.14212	down	SCUBE1	signal peptide, CUB domain, EGF-like 1	Homo sapiens signal peptide, CUB domain, EGF-like 1 (SCUBE1), mRNA [NM_173050]	chr22:43599347-43599288	hs|22q13.2
4.37691	-4.37691	-2.12991	down	KIAA1755	KIAA1755	Homo sapiens KIAA1755 (KIAA1755), mRNA [NM_001029864]	chr20:36839265-36839206	hs|20q11.23
4.3556	-4.3556	-2.12287	down	MLC1	megalencephalic leukoencephalopathy with subcortical cysts 1	Homo sapiens megalencephalic leukoencephalopathy with subcortical cysts 1 (MLC1), transcript variant 1, mRNA [NM_015166]	chr22:50498007-50497948	hs|22q13.33
4.31945	4.31945	2.11085	up	CXCL2	chemokine (C-X-C motif) ligand 2	Homo sapiens chemokine (C-X-C motif) ligand 2 (CXCL2), mRNA [NM_002089]	chr4:74964401-74964342	hs|4q13.3
4.27135	4.27135	2.09469	up	LUCAT1	lung cancer associated transcript 1 (non-protein coding)	Homo sapiens lung cancer associated transcript 1 (non-protein coding) (LUCAT1), transcript variant 1, long non-coding RNA [NR_103548]	chr5:90598902-90598843	hs|5q14.3
4.21282	4.21282	2.07479	up	EPGN	epithelial mitogen	Homo sapiens epithelial mitogen (EPGN), transcript variant 1, mRNA [NM_001270989]	chr4:75178782-75178841	hs|4q13.3
4.19577	4.19577	2.06893	up	CALB2	calbindin 2	Homo sapiens calbindin 2 (CALB2), transcript variant CALB2, mRNA [NM_001740]	chr16:71419509-71423668	hs|16q22.2
4.18269	4.18269	2.06443	up	HERC6	HECT and RLD domain containing E3 ubiquitin protein ligase family member 6	Homo sapiens HECT and RLD domain containing E3 ubiquitin protein ligase family member 6 (HERC6), transcript variant 2, mRNA [NM_001165136]	chr4:89317234-89317293	hs|4q22.1
4.15365	-4.15365	-2.05438	down	PTN	pleiotrophin	Homo sapiens pleiotrophin (PTN), mRNA [NM_002825]	chr7:136912112-136912079	hs|7q33
4.1506	4.1506	2.05332	up	UXT	ubiquitously-expressed, prefoldin-like chaperone	ubiquitously-expressed, prefoldin-like chaperone [Source:HGNC Symbol;Acc:HGNC:12641] [ENST00000376964]	chrX:47516577-47516518	hs|Xp11.23
4.12024	4.12024	2.04273	up	TMEM233	transmembrane protein 233	Homo sapiens transmembrane protein 233 (TMEM233), mRNA [NM_001136534]	chr12:120078559-120078618	hs|12q24.23
4.08785	-4.08785	-2.03134	down	SFRP4	secreted frizzled-related protein 4	Homo sapiens secreted frizzled-related protein 4 (SFRP4), mRNA [NM_003014]	chr7:37945829-37945770	hs|7p14.1
4.06337	-4.06337	-2.02268	down	KRT14	keratin 14, type I	Homo sapiens keratin 14, type I (KRT14), mRNA [NM_000526]	chr17:39738765-39738706	hs|17q21.2
4.03535	-4.03535	-2.01269	down	SFRP4	secreted frizzled-related protein 4	Homo sapiens secreted frizzled-related protein 4 (SFRP4), mRNA [NM_003014]	chr7:37945565-37945534	hs|7p14.1
3.97037	3.97037	1.98927	up	TFPI2	tissue factor pathway inhibitor 2	Homo sapiens tissue factor pathway inhibitor 2 (TFPI2), transcript variant 1, mRNA [NM_006528]	chr7:93516634-93516575	hs|7q21.3
3.96965	3.96965	1.98901	up	CXCL8	chemokine (C-X-C motif) ligand 8	Homo sapiens chemokine (C-X-C motif) ligand 8 (CXCL8), mRNA [NM_000584]	chr4:74609265-74609324	hs|4q13.3
3.96235	-3.96235	-1.98636	down	A2M	alpha-2-macroglobulin	Homo sapiens alpha-2-macroglobulin (A2M), mRNA [NM_000014]	chr12:9221418-9221359	hs|12p13.31
3.89659	-3.89659	-1.96221	down	CPXM2	carboxypeptidase X (M14 family), member 2	Homo sapiens carboxypeptidase X (M14 family), member 2 (CPXM2), mRNA [NM_198148]	chr10:125505253-125505194	hs|10q26.13
3.85351	3.85351	1.94617	up	LOC102724738	tricarboxylate transport protein, mitochondrial-like	PREDICTED: Homo sapiens tricarboxylate transport protein, mitochondrial-like (LOC102724738), misc_RNA [XR_426195]	chr7:62807267-62807208	hs|7q11.21
3.85136	3.85136	1.94537	up	HERC6	HECT and RLD domain containing E3 ubiquitin protein ligase family member 6	Homo sapiens HECT and RLD domain containing E3 ubiquitin protein ligase family member 6 (HERC6), transcript variant 1, mRNA [NM_017912]	chr4:89363667-89363726	hs|4q22.1
3.84685	3.84685	1.94368	up	OASL	2'-5'-oligoadenylate synthetase-like	Homo sapiens 2'-5'-oligoadenylate synthetase-like (OASL), transcript variant 1, mRNA [NM_003733]	chr12:121458379-121458320	hs|12q24.31
3.81984	3.81984	1.93351	up	TSGA10	testis specific, 10	Homo sapiens testis specific, 10 (TSGA10), transcript variant 1, mRNA [NM_025244]	chr2:99614532-99614473	hs|2q11.2
3.79701	-3.79701	-1.92486	down	FAM169A	family with sequence similarity 169, member A	Homo sapiens family with sequence similarity 169, member A (FAM169A), transcript variant 1, mRNA [NM_015566]	chr5:74073811-74073752	hs|5q13.3
3.79126	3.79126	1.92268	up	MUC12	mucin 12, cell surface associated	Homo sapiens mucin 12, cell surface associated (MUC12), mRNA [NM_001164462]	chr7:100646066-100646125	hs|7q22.1
3.7787	3.7787	1.91789	up	CSTA	cystatin A (stefin A)	Homo sapiens cystatin A (stefin A) (CSTA), mRNA [NM_005213]	chr3:122056416-122056475	hs|3q21.1
3.76979	-3.76979	-1.91449	down	ST8SIA6	ST8 alpha-N-acetyl-neuraminide alpha-2,8-sialyltransferase 6	Homo sapiens ST8 alpha-N-acetyl-neuraminide alpha-2,8-sialyltransferase 6 (ST8SIA6), mRNA [NM_001004470]	chr10:17363249-17363190	hs|10p12.33
3.76919	3.76919	1.91425	up	RSAD2	radical S-adenosyl methionine domain containing 2	Homo sapiens radical S-adenosyl methionine domain containing 2 (RSAD2), mRNA [NM_080657]	chr2:7037200-7037259	hs|2p25.2
3.76188	3.76188	1.91145	up	C1orf195	chromosome 1 open reading frame 195	Homo sapiens chromosome 1 open reading frame 195 (C1orf195), transcript variant 1, mRNA [NM_001278501]	chr1:15495032-15494973	hs|1p36.21
3.74638	3.74638	1.9055	up	GPR56	G protein-coupled receptor 56	Homo sapiens G protein-coupled receptor 56 (GPR56), transcript variant 3, mRNA [NM_201525]	chr16:57698776-57698835	hs|16q21
3.74127	3.74127	1.90353	up	MUC12	mucin 12, cell surface associated	Homo sapiens mucin 12, cell surface associated (MUC12), mRNA [NM_001164462]	chr7:100647367-100647426	hs|7q22.1
3.7308	-3.7308	-1.89948	down	LOC102723350	uncharacterized LOC102723350	PREDICTED: Homo sapiens uncharacterized LOC102723350 (LOC102723350), ncRNA [XR_424136]	chr10:71767676-71767617	hs|10q22.1
3.72157	-3.72157	-1.89591	down	LINC01423	long intergenic non-protein coding RNA 1423	Homo sapiens long intergenic non-protein coding RNA 1423 (LINC01423), long non-coding RNA [NR_110545]	chr21:39705247-39704905	hs|21q22.2
3.70678	-3.70678	-1.89017	down	STARD9	StAR-related lipid transfer (START) domain containing 9	Homo sapiens StAR-related lipid transfer (START) domain containing 9 (STARD9), mRNA [NM_020759]	chr15:42956100-42957494	hs|15q15.2
3.69846	3.69846	1.88693	up	CCR1	chemokine (C-C motif) receptor 1	Homo sapiens chemokine (C-C motif) receptor 1 (CCR1), mRNA [NM_001295]	chr3:46243888-46243829	hs|3p21.31
3.69082	-3.69082	-1.88394	down	ITGB2	integrin, beta 2 (complement component 3 receptor 3 and 4 subunit)	Homo sapiens integrin, beta 2 (complement component 3 receptor 3 and 4 subunit) (ITGB2), transcript variant 1, mRNA [NM_000211]	chr21:46305985-46305926	hs|21q22.3
3.65628	3.65628	1.87038	up	NFATC2	nuclear factor of activated T-cells, cytoplasmic, calcineurin-dependent 2	Homo sapiens nuclear factor of activated T-cells, cytoplasmic, calcineurin-dependent 2 (NFATC2), transcript variant 2, mRNA [NM_173091]	chr20:50071181-50071122	hs|20q13.2
3.63725	-3.63725	-1.86285	down	FGL2	fibrinogen-like 2	Homo sapiens fibrinogen-like 2 (FGL2), mRNA [NM_006682]	chr7:76822747-76822688	hs|7q11.23
3.6317	3.6317	1.86065	up	ADAMTS1	ADAM metallopeptidase with thrombospondin type 1 motif, 1	Homo sapiens ADAM metallopeptidase with thrombospondin type 1 motif, 1 (ADAMTS1), mRNA [NM_006988]	chr21:28209959-28209900	hs|21q21.3
3.60848	-3.60848	-1.85139	down	FABP3	fatty acid binding protein 3, muscle and heart	Homo sapiens fatty acid binding protein 3, muscle and heart (FABP3), mRNA [NM_004102]	chr1:31842266-31840317	hs|1p35.2
3.58964	-3.58964	-1.84384	down	CD80	CD80 molecule	Homo sapiens CD80 molecule (CD80), mRNA [NM_005191]	chr3:119243743-119243684	hs|3q13.33
3.5861	3.5861	1.84242	up	CHI3L2	chitinase 3-like 2	Homo sapiens chitinase 3-like 2 (CHI3L2), transcript variant 3, mRNA [NM_001025199]	chr1:111784040-111784882	hs|1p13.3
3.58394	-3.58394	-1.84155	down	RIMS1	regulating synaptic membrane exocytosis 1	regulating synaptic membrane exocytosis 1 [Source:HGNC Symbol;Acc:HGNC:17282] [ENST00000370419]	chr6:72972875-72972934	hs|6q13
3.571	-3.571	-1.83633	down	NHSL2	NHS-like 2	NHS-like 2 [Source:HGNC Symbol;Acc:HGNC:33737] [ENST00000373677]	chrX:71361153-71361212	hs|Xq13.1
3.57006	3.57006	1.83595	up	MX1	MX dynamin-like GTPase 1	Homo sapiens MX dynamin-like GTPase 1 (MX1), transcript variant 2, mRNA [NM_002462]	chr21:42831014-42831073	hs|21q22.3
3.55678	3.55678	1.83057	up	FRMPD4	FERM and PDZ domain containing 4	Homo sapiens FERM and PDZ domain containing 4 (FRMPD4), mRNA [NM_014728]	chrX:12742371-12742430	hs|Xp22.2
3.55207	3.55207	1.82866	up	ANXA10	annexin A10	Homo sapiens annexin A10 (ANXA10), mRNA [NM_007193]	chr4:169108564-169108623	hs|4q32.3
3.54527	-3.54527	-1.82589	down	lnc-SRY-2	lnc-SRY-2:1	BX116938 NCI_CGAP_Kid12 Homo sapiens cDNA clone IMAGp998O085974, mRNA sequence [BX116938]	chrY:2849902-2834945	hs|Yp11.31
3.54456	-3.54456	-1.8256	down	PCDHA5	protocadherin alpha 5	Homo sapiens protocadherin alpha 5 (PCDHA5), transcript variant 2, mRNA [NM_031501]	chr5:140203700-140203759	hs|5q31.3
3.53308	3.53308	1.82093	up	SLC7A11	solute carrier family 7 (anionic amino acid transporter light chain, xc- system), member 11	Homo sapiens solute carrier family 7 (anionic amino acid transporter light chain, xc- system), member 11 (SLC7A11), mRNA [NM_014331]	chr4:139085492-139085433	hs|4q28.3
3.53086	-3.53086	-1.82002	down	MYLIP	myosin regulatory light chain interacting protein	Homo sapiens myosin regulatory light chain interacting protein (MYLIP), mRNA [NM_013262]	chr6:16148409-16148468	hs|6p22.3
3.53061	-3.53061	-1.81992	down	NXPH3	neurexophilin 3	Homo sapiens neurexophilin 3 (NXPH3), mRNA [NM_007225]	chr17:47656996-47657055	hs|17q21.33
3.49285	3.49285	1.80441	up	OR9A2	olfactory receptor, family 9, subfamily A, member 2	Homo sapiens olfactory receptor, family 9, subfamily A, member 2 (OR9A2), mRNA [NM_001001658]	chr7:142723371-142723312	hs|7q34
3.49167	-3.49167	-1.80392	down	SYNE2	spectrin repeat containing, nuclear envelope 2	Homo sapiens spectrin repeat containing, nuclear envelope 2 (SYNE2), transcript variant 5, mRNA [NM_182914]	chr14:64693075-64693134	hs|14q23.2
3.48852	3.48852	1.80262	up	lnc-OBFC2A-3	lnc-OBFC2A-3:1	LNCipedia lincRNA (lnc-OBFC2A-3), lincRNA [lnc-OBFC2A-3:1]	chr2:192684917-192684976	hs|2q32.3
3.48774	-3.48774	-1.80229	down	SYNE2	spectrin repeat containing, nuclear envelope 2	Homo sapiens spectrin repeat containing, nuclear envelope 2 (SYNE2), transcript variant 1, mRNA [NM_015180]	chr14:64416714-64421485	hs|14q23.2
3.44763	-3.44763	-1.7856	down	PABPC5	poly(A) binding protein, cytoplasmic 5	Homo sapiens poly(A) binding protein, cytoplasmic 5 (PABPC5), mRNA [NM_080832]	chrX:90693128-90693187	hs|Xq21.31
3.43084	3.43084	1.77856	up	PRKAA2	protein kinase, AMP-activated, alpha 2 catalytic subunit	Homo sapiens protein kinase, AMP-activated, alpha 2 catalytic subunit (PRKAA2), mRNA [NM_006252]	chr1:57180117-57180176	hs|1p32.2
3.41848	3.41848	1.77335	up	LOC101930441	mucin-3A-like	PREDICTED: Homo sapiens mucin-3A-like (LOC101930441), partial mRNA [XM_006710237]
3.38834	-3.38834	-1.76058	down	FAM84A	family with sequence similarity 84, member A	Homo sapiens family with sequence similarity 84, member A (FAM84A), mRNA [NM_145175]	chr2:14776066-14776125	hs|2p24.3
3.38435	3.38435	1.75888	up	MYPN	myopalladin	Homo sapiens myopalladin (MYPN), transcript variant 1, mRNA [NM_032578]	chr10:69970993-69971052	hs|10q21.3
3.38427	-3.38427	-1.75885	down	MBP	myelin basic protein	Homo sapiens myelin basic protein (MBP), transcript variant 8, mRNA [NM_001025100]	chr18:74724904-74724845	hs|18q23
3.379	3.379	1.7566	up	AGPAT9	1-acylglycerol-3-phosphate O-acyltransferase 9	Homo sapiens 1-acylglycerol-3-phosphate O-acyltransferase 9 (AGPAT9), transcript variant 1, mRNA [NM_032717]	chr4:84526584-84526643	hs|4q21.23
3.36284	-3.36284	-1.74968	down	FGD6	FYVE, RhoGEF and PH domain containing 6	Homo sapiens FYVE, RhoGEF and PH domain containing 6 (FGD6), mRNA [NM_018351]	chr12:95470741-95470682	hs|12q22
3.3611	3.3611	1.74894	up	OR5AK2	olfactory receptor, family 5, subfamily AK, member 2	Homo sapiens olfactory receptor, family 5, subfamily AK, member 2 (OR5AK2), mRNA [NM_001005323]	chr11:56756469-56756528	hs|11q12.1
3.34203	3.34203	1.74073	up	ADAMTS1	ADAM metallopeptidase with thrombospondin type 1 motif, 1	Homo sapiens ADAM metallopeptidase with thrombospondin type 1 motif, 1 (ADAMTS1), mRNA [NM_006988]	chr21:28209768-28209709	hs|21q21.3
3.33113	3.33113	1.73601	up	ITGA2	integrin, alpha 2 (CD49B, alpha 2 subunit of VLA-2 receptor)	Homo sapiens integrin, alpha 2 (CD49B, alpha 2 subunit of VLA-2 receptor) (ITGA2), transcript variant 1, mRNA [NM_002203]	chr5:52389637-52389696	hs|5q11.2
3.32619	3.32619	1.73387	up	PSAT1	phosphoserine aminotransferase 1	Homo sapiens phosphoserine aminotransferase 1 (PSAT1), transcript variant 1, mRNA [NM_058179]	chr9:80944015-80944074	hs|9q21.2
3.30456	3.30456	1.72446	up	GATA4	GATA binding protein 4	GATA binding protein 4 [Source:HGNC Symbol;Acc:HGNC:4173] [ENST00000532977]	chr8:11558173-11558232	hs|8p23.1
3.30399	-3.30399	-1.72421	down	LDLRAD2	low density lipoprotein receptor class A domain containing 2	Homo sapiens low density lipoprotein receptor class A domain containing 2 (LDLRAD2), mRNA [NM_001013693]	chr1:22151636-22151695	hs|1p36.12
3.29719	-3.29719	-1.72124	down	TRAF1	TNF receptor-associated factor 1	Homo sapiens TNF receptor-associated factor 1 (TRAF1), transcript variant 1, mRNA [NM_005658]	chr9:123664733-123664674	hs|9q33.2
3.26323	3.26323	1.7063	up	NR4A2	nuclear receptor subfamily 4, group A, member 2	Homo sapiens nuclear receptor subfamily 4, group A, member 2 (NR4A2), mRNA [NM_006186]	chr2:157182315-157182256	hs|2q24.1
3.26288	-3.26288	-1.70615	down	ASPN	asporin	Homo sapiens asporin (ASPN), transcript variant 1, mRNA [NM_017680]	chr9:95218993-95218934	hs|9q22.31
3.24278	-3.24278	-1.69723	down	COL11A1	collagen, type XI, alpha 1	Homo sapiens collagen, type XI, alpha 1 (COL11A1), transcript variant B, mRNA [NM_080629]	chr1:103342142-103342083	hs|1p21.1
3.2352	-3.2352	-1.69385	down	PHLDB2	pleckstrin homology-like domain, family B, member 2	Homo sapiens pleckstrin homology-like domain, family B, member 2 (PHLDB2), transcript variant 1, mRNA [NM_001134438]	chr3:111694456-111694515	hs|3q13.2
3.2342	-3.2342	-1.69341	down	FMO3	flavin containing monooxygenase 3	Homo sapiens flavin containing monooxygenase 3 (FMO3), transcript variant 2, mRNA [NM_001002294]	chr1:171086488-171086547	hs|1q24.3
3.22901	-3.22901	-1.69109	down	GLI2	GLI family zinc finger 2	Homo sapiens GLI family zinc finger 2 (GLI2), mRNA [NM_005270]	chr2:121746874-121746933	hs|2q14.2
3.22658	-3.22658	-1.69001	down	LDB3	LIM domain binding 3	Homo sapiens LIM domain binding 3 (LDB3), transcript variant 5, mRNA [NM_001171610]	chr10:88495765-88495824	hs|10q23.2
3.20715	-3.20715	-1.68129	down	FBLN1	fibulin 1	Homo sapiens fibulin 1 (FBLN1), transcript variant C, mRNA [NM_001996]	chr22:45959173-45959232	hs|22q13.31
3.20323	-3.20323	-1.67953	down	ZNF507	zinc finger protein 507	Homo sapiens zinc finger protein 507 (ZNF507), transcript variant 1, mRNA [NM_001136156]	chr19:32878432-32878491	hs|19q13.11
3.19362	3.19362	1.67519	up	NFATC2	nuclear factor of activated T-cells, cytoplasmic, calcineurin-dependent 2	Homo sapiens nuclear factor of activated T-cells, cytoplasmic, calcineurin-dependent 2 (NFATC2), transcript variant 1, mRNA [NM_012340]	chr20:50007824-50007765	hs|20q13.2
3.19317	-3.19317	-1.67499	down	TMPRSS5	transmembrane protease, serine 5	Homo sapiens transmembrane protease, serine 5 (TMPRSS5), transcript variant 4, mRNA [NM_001288751]	chr11:113560547-113560488	hs|11q23.2
3.18277	3.18277	1.67028	up	BMP2	bone morphogenetic protein 2	Homo sapiens bone morphogenetic protein 2 (BMP2), mRNA [NM_001200]	chr20:6760810-6760869	hs|20p12.3
3.1825	-3.1825	-1.67016	down	PPM1B	protein phosphatase, Mg2+/Mn2+ dependent, 1B	Homo sapiens protein phosphatase, Mg2+/Mn2+ dependent, 1B (PPM1B), transcript variant 2, mRNA [NM_177968]	chr2:44461288-44461347	hs|2p21
3.17922	-3.17922	-1.66867	down	HIST1H4G	histone cluster 1, H4g	Homo sapiens histone cluster 1, H4g (HIST1H4G), mRNA [NM_003547]	chr6:26247146-26247087	hs|6p22.2
3.15932	-3.15932	-1.65961	down	HAPLN3	hyaluronan and proteoglycan link protein 3	Homo sapiens hyaluronan and proteoglycan link protein 3 (HAPLN3), mRNA [NM_178232]	chr15:89420640-89420581	hs|15q26.1
3.13872	-3.13872	-1.65018	down	CGNL1	cingulin-like 1	Homo sapiens cingulin-like 1 (CGNL1), transcript variant 2, mRNA [NM_032866]	chr15:57842847-57842906	hs|15q21.3
3.12571	-3.12571	-1.64418	down	PLN	phospholamban	Homo sapiens phospholamban (PLN), mRNA [NM_002667]	chr6:118880782-118880841	hs|6q22.31
3.12533	3.12533	1.64401	up	ADAM30	ADAM metallopeptidase domain 30	Homo sapiens ADAM metallopeptidase domain 30 (ADAM30), mRNA [NM_021794]	chr1:120436717-120436658	hs|1p12
3.12179	-3.12179	-1.64237	down	ACADS	acyl-CoA dehydrogenase, C-2 to C-3 short chain	Homo sapiens acyl-CoA dehydrogenase, C-2 to C-3 short chain (ACADS), transcript variant 1, mRNA [NM_000017]	chr12:121176685-121176968	hs|12q24.31
3.11547	-3.11547	-1.63945	down	MAPT	microtubule-associated protein tau	Homo sapiens microtubule-associated protein tau (MAPT), transcript variant 1, mRNA [NM_016835]	chr17:44105489-44105548	hs|17q21.31
3.11216	3.11216	1.63792	up	DUSP4	dual specificity phosphatase 4	Homo sapiens dual specificity phosphatase 4 (DUSP4), transcript variant 1, mRNA [NM_001394]	chr8:29194441-29194382	hs|8p12
3.09736	-3.09736	-1.63104	down	FBLN1	fibulin 1	Homo sapiens fibulin 1 (FBLN1), transcript variant D, mRNA [NM_006486]	chr22:45996933-45996992	hs|22q13.31
3.09466	-3.09466	-1.62978	down	lnc-HAAO-1	lnc-HAAO-1:1	Q3X3G3_9ACTN (Q3X3G3) CHAD:Adenylate cyclase, partial (5%) [THC2614847]	chr2:43037833-43037774	hs|2p21
3.07577	-3.07577	-1.62095	down	MDM1	Mdm1 nuclear protein homolog (mouse)	Homo sapiens Mdm1 nuclear protein homolog (mouse) (MDM1), transcript variant 1, mRNA [NM_017440]	chr12:68688887-68688828	hs|12q15
3.06757	3.06757	1.6171	up	TLX1	T-cell leukemia homeobox 1	Homo sapiens T-cell leukemia homeobox 1 (TLX1), transcript variant 1, mRNA [NM_005521]	chr10:102896585-102896644	hs|10q24.31
3.06282	3.06282	1.61486	up	OCLN	occludin	Homo sapiens occludin (OCLN), transcript variant 1, mRNA [NM_002538]	chr5:68849515-68849574	hs|5q13.2
3.05709	-3.05709	-1.61216	down	COMP	cartilage oligomeric matrix protein	Homo sapiens cartilage oligomeric matrix protein (COMP), mRNA [NM_000095]	chr19:18893877-18893726	hs|19p13.11
3.04728	-3.04728	-1.60752	down	MFAP5	microfibrillar associated protein 5	Homo sapiens microfibrillar associated protein 5 (MFAP5), transcript variant 1, mRNA [NM_003480]	chr12:8800746-8800687	hs|12p13.31
3.04653	-3.04653	-1.60717	down	KRT14	keratin 14, type I	Homo sapiens keratin 14, type I (KRT14), mRNA [NM_000526]	chr17:39740072-39740013	hs|17q21.2
3.03773	-3.03773	-1.60299	down	TRAPPC2	trafficking protein particle complex 2	trafficking protein particle complex 2 [Source:HGNC Symbol;Acc:HGNC:23068] [ENST00000519382]	chrX:13734302-13734243	hs|Xp22.2
3.03723	3.03723	1.60276	up	INSL4	insulin-like 4 (placenta)	Homo sapiens insulin-like 4 (placenta) (INSL4), mRNA [NM_002195]	chr9:5233695-5233754	hs|9p24.1
3.0315	-3.0315	-1.60003	down	PCSK9	proprotein convertase subtilisin/kexin type 9	Homo sapiens proprotein convertase subtilisin/kexin type 9 (PCSK9), transcript variant 1, mRNA [NM_174936]	chr1:55530453-55530512	hs|1p32.3
3.03128	3.03128	1.59993	up	CCND2	cyclin D2	Homo sapiens cyclin D2 (CCND2), mRNA [NM_001759]	chr12:4414040-4414099	hs|12p13.32
3.02594	3.02594	1.59738	up	lnc-TMEM30B-3	lnc-TMEM30B-3:6	LNCipedia lincRNA (lnc-TMEM30B-3), lincRNA [lnc-TMEM30B-3:6]	chr14:62023021-62022962	hs|14q23.1
3.01953	-3.01953	-1.59432	down	KCNS3	potassium voltage-gated channel, modifier subfamily S, member 3	Homo sapiens potassium voltage-gated channel, modifier subfamily S, member 3 (KCNS3), transcript variant 1, mRNA [NM_002252]	chr2:18114112-18114171	hs|2p24.2
3.01925	-3.01925	-1.59419	down	FAM84A	family with sequence similarity 84, member A	Homo sapiens family with sequence similarity 84, member A (FAM84A), mRNA [NM_145175]	chr2:14775490-14775549	hs|2p24.3
3.01664	3.01664	1.59294	up	RRAGD	Ras-related GTP binding D	Homo sapiens Ras-related GTP binding D (RRAGD), mRNA [NM_021244]	chr6:90087437-90082293	hs|6q15
3.00948	3.00948	1.58951	up	OK/SW-CL.36	OK/SW-CL.36	Homo sapiens mRNA for OK/SW-CL.36, complete cds. [AB064670]	chr4:84482723-84482664	hs|4q21.23
3.00697	-3.00697	-1.58831	down	ITGA8	integrin, alpha 8	Homo sapiens integrin, alpha 8 (ITGA8), transcript variant 1, mRNA [NM_003638]	chr10:15561364-15561305	hs|10p13
3.0029	3.0029	1.58636	up	LOC101929584	uncharacterized LOC101929584	Homo sapiens uncharacterized LOC101929584 (LOC101929584), transcript variant 2, long non-coding RNA [NR_120477]	chr12:5347455-5347396	hs|12p13.32
3.00111	3.00111	1.5855	up	NOV	nephroblastoma overexpressed	Homo sapiens nephroblastoma overexpressed (NOV), mRNA [NM_002514]	chr8:120436435-120436494	hs|8q24.12
2.98992	-2.98992	-1.58011	down	HNRNPH1	heterogeneous nuclear ribonucleoprotein H1 (H)	heterogeneous nuclear ribonucleoprotein H1 (H) [Source:HGNC Symbol;Acc:HGNC:5041] [ENST00000521116]	chr5:179061631-179061572	hs|5q35.3
2.98415	2.98415	1.57732	up	PSAT1	phosphoserine aminotransferase 1	Homo sapiens phosphoserine aminotransferase 1 (PSAT1), transcript variant 1, mRNA [NM_058179]	chr9:80944778-80944837	hs|9q21.2
2.98129	2.98129	1.57594	up	MUC5AC	mucin 5AC, oligomeric mucus/gel-forming	PREDICTED: Homo sapiens mucin 5AC, oligomeric mucus/gel-forming (MUC5AC), partial mRNA [XM_006709947]	chr11:1213031-1213090	hs|11p15.5
2.97682	2.97682	1.57377	up	PTPN22	protein tyrosine phosphatase, non-receptor type 22 (lymphoid)	Homo sapiens protein tyrosine phosphatase, non-receptor type 22 (lymphoid) (PTPN22), transcript variant 2, mRNA [NM_012411]	chr1:114376990-114376931	hs|1p13.2
2.97268	2.97268	1.57176	up	KYNU	kynureninase	Homo sapiens kynureninase (KYNU), transcript variant 2, mRNA [NM_001032998]	chr2:143715219-143715278	hs|2q22.2
2.967	-2.967	-1.569	down	MRVI1	murine retrovirus integration site 1 homolog	Homo sapiens murine retrovirus integration site 1 homolog (MRVI1), transcript variant 2, mRNA [NM_130385]	chr11:10594698-10594639	hs|11p15.4
2.95631	-2.95631	-1.5638	down	FBLN1	fibulin 1	Homo sapiens fibulin 1 (FBLN1), transcript variant C, mRNA [NM_001996]	chr22:45939377-45942994	hs|22q13.31
2.95403	2.95403	1.56268	up	C2orf50	chromosome 2 open reading frame 50	chromosome 2 open reading frame 50 [Source:HGNC Symbol;Acc:HGNC:26324] [ENST00000381585]	chr2:11286010-11286069	hs|2p25.1
2.94978	-2.94978	-1.56061	down	LOC102723481	uncharacterized LOC102723481	PREDICTED: Homo sapiens uncharacterized LOC102723481 (LOC102723481), ncRNA [XR_424610]	chr15:67223936-67223877	hs|15q22.32
2.94731	-2.94731	-1.5594	down	CLUL1	clusterin-like 1 (retinal)	Homo sapiens clusterin-like 1 (retinal) (CLUL1), transcript variant 3, mRNA [NM_001289036]	chr18:650179-650238	hs|18p11.32
2.94709	2.94709	1.55929	up	IL13RA2	interleukin 13 receptor, alpha 2	Homo sapiens interleukin 13 receptor, alpha 2 (IL13RA2), mRNA [NM_000640]	chrX:114238650-114238591	hs|Xq23
2.93652	2.93652	1.55411	up	GCNT3	glucosaminyl (N-acetyl) transferase 3, mucin type	Homo sapiens glucosaminyl (N-acetyl) transferase 3, mucin type (GCNT3), mRNA [NM_004751]	chr15:59911364-59911423	hs|15q22.2
2.93494	2.93494	1.55333	up	PREX1	phosphatidylinositol-3,4,5-trisphosphate-dependent Rac exchange factor 1	Homo sapiens phosphatidylinositol-3,4,5-trisphosphate-dependent Rac exchange factor 1 (PREX1), mRNA [NM_020820]	chr20:47241677-47241619	hs|20q13.13
2.93217	2.93217	1.55197	up	VWDE	von Willebrand factor D and EGF domains	Homo sapiens von Willebrand factor D and EGF domains (VWDE), mRNA [NM_001135924]	chr7:12428817-12428758	hs|7p21.3
2.93182	2.93182	1.55179	up	IFIT1	interferon-induced protein with tetratricopeptide repeats 1	Homo sapiens interferon-induced protein with tetratricopeptide repeats 1 (IFIT1), transcript variant 1, mRNA [NM_001548]	chr10:91163438-91163497	hs|10q23.31
2.92085	2.92085	1.54639	up	CHRNA1	cholinergic receptor, nicotinic, alpha 1 (muscle)	Homo sapiens cholinergic receptor, nicotinic, alpha 1 (muscle) (CHRNA1), transcript variant 1, mRNA [NM_001039523]	chr2:175619052-175618993	hs|2q31.1
2.91763	2.91763	1.54479	up	LOC100505878	uncharacterized LOC100505878	Homo sapiens uncharacterized LOC100505878 (LOC100505878), long non-coding RNA [NR_105017]	chr5:86045486-86045545	hs|5q14.3
2.91479	2.91479	1.54339	up	PAPPA	pregnancy-associated plasma protein A, pappalysin 1	Homo sapiens pregnancy-associated plasma protein A, pappalysin 1 (PAPPA), mRNA [NM_002581]	chr9:119164007-119164066	hs|9q33.1
2.91217	2.91217	1.54209	up	PTGER3	prostaglandin E receptor 3 (subtype EP3)	Homo sapiens prostaglandin E receptor 3 (subtype EP3) (PTGER3), transcript variant 7, mRNA [NM_198717]	chr1:71478048-71477989	hs|1p31.1
2.90557	-2.90557	-1.53882	down	SETBP1	SET binding protein 1	Homo sapiens SET binding protein 1 (SETBP1), transcript variant 1, mRNA [NM_015559]	chr18:42648247-42648306	hs|18q12.3
2.90529	2.90529	1.53868	up	CXCL1	chemokine (C-X-C motif) ligand 1 (melanoma growth stimulating activity, alpha)	Homo sapiens chemokine (C-X-C motif) ligand 1 (melanoma growth stimulating activity, alpha) (CXCL1), transcript variant 1, mRNA [NM_001511]	chr4:74735646-74735705	hs|4q13.3
2.89905	2.89905	1.53558	up	OR9A4	olfactory receptor, family 9, subfamily A, member 4	Homo sapiens olfactory receptor, family 9, subfamily A, member 4 (OR9A4), mRNA [NM_001001656]	chr7:141619149-141619208	hs|7q34
2.89423	2.89423	1.53318	up	GPC5	glypican 5	Homo sapiens glypican 5 (GPC5), mRNA [NM_004466]	chr13:93518633-93518692	hs|13q31.3
2.88758	-2.88758	-1.52986	down	CNTRL	centriolin	centriolin [Source:HGNC Symbol;Acc:HGNC:1858] [ENST00000491018]	chr9:123923724-123923783	hs|9q33.2
2.88644	-2.88644	-1.52929	down	LSAMP-AS1	uncharacterized LOC101926903	Homo sapiens uncharacterized LOC101926903 (LSAMP-AS1), long non-coding RNA [NR_109998]	chr3:116087088-116088706	hs|3q13.31
2.8781	2.8781	1.52512	up	TAS2R16	taste receptor, type 2, member 16	Homo sapiens taste receptor, type 2, member 16 (TAS2R16), mRNA [NM_016945]	chr7:122635413-122635354	hs|7q31.32
2.87525	-2.87525	-1.52369	down	lnc-ANKRD1-1	lnc-ANKRD1-1:1	DA217605 BRAWH3 Homo sapiens cDNA clone BRAWH3008536 5', mRNA sequence [DA217605]	chr10:92720892-92720833	hs|10q23.31
2.87323	2.87323	1.52267	up	HAS1	hyaluronan synthase 1	Homo sapiens hyaluronan synthase 1 (HAS1), transcript variant 1, mRNA [NM_001523]	chr19:52220222-52219584	hs|19q13.41
2.87286	2.87286	1.52249	up	TLR8	toll-like receptor 8	Homo sapiens toll-like receptor 8 (TLR8), transcript variant 1, mRNA [NM_016610]	chrX:12940262-12940321	hs|Xp22.2
2.8688	2.8688	1.52045	up	CDCP1	CUB domain containing protein 1	Homo sapiens CUB domain containing protein 1 (CDCP1), transcript variant 2, mRNA [NM_178181]	chr3:45153600-45152300	hs|3p21.31
2.86159	2.86159	1.51682	up	CSGALNACT1	chondroitin sulfate N-acetylgalactosaminyltransferase 1	Homo sapiens chondroitin sulfate N-acetylgalactosaminyltransferase 1 (CSGALNACT1), transcript variant 1, mRNA [NM_001130518]	chr8:19315997-19315938	hs|8p21.3
2.85631	-2.85631	-1.51415	down	lnc-TRAPPC6B-1	lnc-TRAPPC6B-1:1	LNCipedia lincRNA (lnc-TRAPPC6B-1), lincRNA [lnc-TRAPPC6B-1:1]	chr14:39644148-39644089	hs|14q21.1
2.85252	-2.85252	-1.51224	down	TSHR	thyroid stimulating hormone receptor	Homo sapiens thyroid stimulating hormone receptor (TSHR), transcript variant 2, mRNA [NM_001018036]	chr14:81557464-81558910	hs|14q31.1
2.84901	-2.84901	-1.51046	down	C16orf47	chromosome 16 open reading frame 47	Homo sapiens chromosome 16 open reading frame 47 (C16orf47), mRNA [NM_207385]	chr16:73160596-73160537	hs|16q22.3
2.84738	2.84738	1.50964	up	RGL3	ral guanine nucleotide dissociation stimulator-like 3	Homo sapiens ral guanine nucleotide dissociation stimulator-like 3 (RGL3), transcript variant 1, mRNA [NM_001161616]	chr19:11508181-11508122	hs|19p13.2
2.84651	-2.84651	-1.50919	down	LOC100506737	uncharacterized LOC100506737	PREDICTED: Homo sapiens uncharacterized LOC100506737 (LOC100506737), ncRNA [XR_172388]	chr22:46000392-46000333	hs|22q13.31
2.84551	2.84551	1.50869	up	AREG	amphiregulin	Homo sapiens amphiregulin (AREG), mRNA [NM_001657]	chr4:75320518-75320577	hs|4q13.3
2.83955	2.83955	1.50566	up	GPAM	glycerol-3-phosphate acyltransferase, mitochondrial	Homo sapiens glycerol-3-phosphate acyltransferase, mitochondrial (GPAM), transcript variant 2, mRNA [NM_020918]	chr10:113909886-113909827	hs|10q25.2
2.83714	-2.83714	-1.50444	down	KIT	v-kit Hardy-Zuckerman 4 feline sarcoma viral oncogene homolog	Homo sapiens v-kit Hardy-Zuckerman 4 feline sarcoma viral oncogene homolog (KIT), transcript variant 1, mRNA [NM_000222]	chr4:55593626-55593685	hs|4q12
2.83576	2.83576	1.50373	up	HABP2	hyaluronan binding protein 2	Homo sapiens hyaluronan binding protein 2 (HABP2), transcript variant 1, mRNA [NM_004132]	chr10:115348335-115348394	hs|10q25.3
2.8352	2.8352	1.50345	up	LOC645645	uncharacterized LOC645645	Homo sapiens cDNA FLJ44102 fis, clone TESTI4044035. [AK126090]	chr1:235752062-235752121	hs|1q42.3
2.83155	2.83155	1.50159	up	MMP1	matrix metallopeptidase 1 (interstitial collagenase)	Homo sapiens matrix metallopeptidase 1 (interstitial collagenase) (MMP1), transcript variant 1, mRNA [NM_002421]	chr11:102660756-102660697	hs|11q22.2
2.83058	-2.83058	-1.5011	down	NHSL2	NHS-like 2	Homo sapiens NHS-like 2 (NHSL2), mRNA [NM_001013627]	chrX:71356956-71357015	hs|Xq13.1
2.82938	2.82938	1.50049	up	IFI44L	interferon-induced protein 44-like	Homo sapiens interferon-induced protein 44-like (IFI44L), mRNA [NM_006820]	chr1:79107590-79107649	hs|1p31.1
2.82748	-2.82748	-1.49952	down	TMEM130	transmembrane protein 130	Homo sapiens transmembrane protein 130 (TMEM130), transcript variant 2, mRNA [NM_152913]	chr7:98444214-98444155	hs|7q22.1
2.82631	-2.82631	-1.49892	down	GREM2	gremlin 2, DAN family BMP antagonist	Homo sapiens gremlin 2, DAN family BMP antagonist (GREM2), mRNA [NM_022469]	chr1:240654036-240653977	hs|1q43
2.81754	2.81754	1.49443	up	LOC101927363	uncharacterized LOC101927363	PREDICTED: Homo sapiens uncharacterized LOC101927363 (LOC101927363), ncRNA [XR_245252]	chr4:32354705-32354764	hs|4p15.1
2.8136	-2.8136	-1.49242	down	RBM24	RNA binding motif protein 24	Homo sapiens RNA binding motif protein 24 (RBM24), transcript variant 2, mRNA [NM_153020]	chr6:17293731-17293790	hs|6p22.3
2.81349	2.81349	1.49236	up	MPP4	membrane protein, palmitoylated 4 (MAGUK p55 subfamily member 4)	Homo sapiens membrane protein, palmitoylated 4 (MAGUK p55 subfamily member 4) (MPP4), mRNA [NM_033066]	chr2:202510065-202510006	hs|2q33.1
2.81062	-2.81062	-1.49089	down	AEBP1	AE binding protein 1	Homo sapiens AE binding protein 1 (AEBP1), mRNA [NM_001129]	chr7:44153822-44153881	hs|7p13
2.81024	-2.81024	-1.4907	down	CILP2	cartilage intermediate layer protein 2	Homo sapiens cartilage intermediate layer protein 2 (CILP2), mRNA [NM_153221]	chr19:19657135-19657194	hs|19p13.11
2.8063	-2.8063	-1.48867	down	DDIT4L	DNA-damage-inducible transcript 4-like	Homo sapiens DNA-damage-inducible transcript 4-like, mRNA (cDNA clone MGC:9960 IMAGE:3877854), complete cds. [BC013592]	chr4:101107295-101107236	hs|4q24
2.80202	2.80202	1.48647	up	LOC102723456	uncharacterized LOC102723456	PREDICTED: Homo sapiens uncharacterized LOC102723456 (LOC102723456), ncRNA [XR_424816]	chr17:35218995-35218936	hs|17q12
2.7973	2.7973	1.48403	up	LOC102723946	uncharacterized LOC102723946	ZN695_HUMAN (Q8IW36) Zinc finger protein 695 (Zinc finger protein SBZF3), partial (8%) [THC2641926]	chr7:93693961-93694020	hs|7q21.3
2.79497	-2.79497	-1.48283	down	GAPDHS	glyceraldehyde-3-phosphate dehydrogenase, spermatogenic	Homo sapiens glyceraldehyde-3-phosphate dehydrogenase, spermatogenic (GAPDHS), mRNA [NM_014364]	chr19:36029273-36029505	hs|19q13.12
2.78991	-2.78991	-1.48022	down	GUCY1B3	guanylate cyclase 1, soluble, beta 3	Homo sapiens guanylate cyclase 1, soluble, beta 3 (GUCY1B3), transcript variant 4, mRNA [NM_001291953]	chr4:156726320-156726379	hs|4q32.1
2.78742	-2.78742	-1.47893	down	KAL1	Kallmann syndrome 1 sequence	Homo sapiens Kallmann syndrome 1 sequence (KAL1), mRNA [NM_000216]	chrX:8497292-8497233	hs|Xp22.31
2.7818	-2.7818	-1.47602	down	HERC3	HECT and RLD domain containing E3 ubiquitin protein ligase 3	Homo sapiens HECT and RLD domain containing E3 ubiquitin protein ligase 3 (HERC3), transcript variant 1, mRNA [NM_014606]	chr4:89629429-89629488	hs|4q22.1
2.7804	-2.7804	-1.47529	down	EFNB3	ephrin-B3	Homo sapiens ephrin-B3 (EFNB3), mRNA [NM_001406]	chr17:7614123-7614182	hs|17p13.1
2.77803	2.77803	1.47406	up	SHC3	SHC (Src homology 2 domain containing) transforming protein 3	Homo sapiens SHC (Src homology 2 domain containing) transforming protein 3 (SHC3), mRNA [NM_016848]	chr9:91628173-91628114	hs|9q22.1
2.77672	-2.77672	-1.47338	down	CACNA1D	calcium channel, voltage-dependent, L type, alpha 1D subunit	Homo sapiens calcium channel, voltage-dependent, L type, alpha 1D subunit (CACNA1D), transcript variant 1, mRNA [NM_000720]	chr3:53845581-53845640	hs|3p21.1
2.7703	-2.7703	-1.47004	down	BGN	biglycan	Homo sapiens biglycan (BGN), mRNA [NM_001711]	chrX:152773933-152773992	hs|Xq28
2.76876	-2.76876	-1.46924	down	SCUBE3	signal peptide, CUB domain, EGF-like 3	Homo sapiens signal peptide, CUB domain, EGF-like 3 (SCUBE3), transcript variant 1, mRNA [NM_152753]	chr6:35218376-35218435	hs|6p21.31
2.76773	2.76773	1.46871	up	OAS1	2'-5'-oligoadenylate synthetase 1, 40/46kDa	Homo sapiens 2'-5'-oligoadenylate synthetase 1, 40/46kDa (OAS1), transcript variant 2, mRNA [NM_002534]	chr12:113354461-113354520	hs|12q24.13
2.76285	-2.76285	-1.46616	down	BMP4	bone morphogenetic protein 4	Homo sapiens bone morphogenetic protein 4 (BMP4), transcript variant 1, mRNA [NM_001202]	chr14:54417377-54417318	hs|14q22.2
2.75798	-2.75798	-1.46361	down	lnc-RP11-351M8.1.1-1	lnc-RP11-351M8.1.1-1:1	LNCipedia lincRNA (lnc-RP11-351M8.1.1-1), lincRNA [lnc-RP11-351M8.1.1-1:1]	chr15:81188590-81188531	hs|15q25.1
2.75601	-2.75601	-1.46258	down	SCUBE2	signal peptide, CUB domain, EGF-like 2	Homo sapiens signal peptide, CUB domain, EGF-like 2 (SCUBE2), transcript variant 1, mRNA [NM_020974]	chr11:9043471-9042734	hs|11p15.4
2.75543	-2.75543	-1.46228	down	MIR99AHG	mir-99a-let-7c cluster host gene (non-protein coding)	mir-99a-let-7c cluster host gene (non-protein coding) [Source:HGNC Symbol;Acc:HGNC:1274] [ENST00000602892]	chr21:17792032-17859839	hs|21q21.1
2.75145	2.75145	1.46019	up	LOC101929470	uncharacterized LOC101929470	Homo sapiens uncharacterized LOC101929470 (LOC101929470), long non-coding RNA [NR_125817]	chr8:29672633-29672574	hs|8p12
2.74949	-2.74949	-1.45916	down	MB21D2	Mab-21 domain containing 2	Homo sapiens Mab-21 domain containing 2 (MB21D2), mRNA [NM_178496]	chr3:192515209-192515150	hs|3q29
2.74841	2.74841	1.4586	up	CCDC70	coiled-coil domain containing 70	Homo sapiens coiled-coil domain containing 70 (CCDC70), mRNA [NM_031290]	chr13:52439788-52439847	hs|13q14.3
2.74725	2.74725	1.45799	up	PTPN22	protein tyrosine phosphatase, non-receptor type 22 (lymphoid)	Homo sapiens protein tyrosine phosphatase, non-receptor type 22 (lymphoid) (PTPN22), transcript variant 1, mRNA [NM_015967]	chr1:114356520-114356461	hs|1p13.2
2.74672	2.74672	1.45771	up	CCL18	chemokine (C-C motif) ligand 18 (pulmonary and activation-regulated)	Homo sapiens chemokine (C-C motif) ligand 18 (pulmonary and activation-regulated) (CCL18), mRNA [NM_002988]	chr17:34398680-34398739	hs|17q12
2.74617	-2.74617	-1.45742	down	LOC102724209	uncharacterized LOC102724209	PREDICTED: Homo sapiens uncharacterized LOC102724209 (LOC102724209), ncRNA [XR_424249]	chr11:68041927-68041986	hs|11q13.2
2.73751	2.73751	1.45286	up	BDKRB1	bradykinin receptor B1	Homo sapiens bradykinin receptor B1 (BDKRB1), mRNA [NM_000710]	chr14:96731011-96731070	hs|14q32.2
2.7371	-2.7371	-1.45265	down	FAM199X	family with sequence similarity 199, X-linked	Homo sapiens family with sequence similarity 199, X-linked (FAM199X), mRNA [NM_207318]	chrX:103440455-103440514	hs|Xq22.2
2.72986	-2.72986	-1.44883	down	AMOT	angiomotin	Homo sapiens angiomotin (AMOT), transcript variant 1, mRNA [NM_001113490]	chrX:112021799-112021740	hs|Xq23
2.72925	-2.72925	-1.44851	down	TFAP2A	transcription factor AP-2 alpha (activating enhancer binding protein 2 alpha)	transcription factor AP-2 alpha (activating enhancer binding protein 2 alpha) [Source:HGNC Symbol;Acc:HGNC:11742] [ENST00000478375]	chr6:10402318-10402259	hs|6p24.3
2.727	-2.727	-1.44732	down	RTKN2	rhotekin 2	Homo sapiens rhotekin 2 (RTKN2), transcript variant 2, mRNA [NM_001282941]	chr10:63998464-63998405	hs|10q21.2
2.72672	-2.72672	-1.44716	down	CISH	cytokine inducible SH2-containing protein	Homo sapiens cytokine inducible SH2-containing protein (CISH), transcript variant 2, mRNA [NM_145071]	chr3:50644082-50644023	hs|3p21.2
2.72206	2.72206	1.4447	up	MLPH	melanophilin	Homo sapiens melanophilin (MLPH), transcript variant 1, mRNA [NM_024101]	chr2:238457898-238461015	hs|2q37.3
2.72032	2.72032	1.44378	up	NMB	neuromedin B	Homo sapiens neuromedin B (NMB), transcript variant 1, mRNA [NM_021077]	chr15:85198461-85198402	hs|15q25.2
2.71995	-2.71995	-1.44358	down	MAN1C1	mannosidase, alpha, class 1C, member 1	Homo sapiens mannosidase, alpha, class 1C, member 1 (MAN1C1), transcript variant 1, mRNA [NM_020379]	chr1:26098204-26098263	hs|1p36.11
2.71774	2.71774	1.44241	up	OR51A4	olfactory receptor, family 51, subfamily A, member 4	Homo sapiens olfactory receptor, family 51, subfamily A, member 4 (OR51A4), mRNA [NM_001005329]	chr11:4967477-4967418	hs|11p15.4
2.71752	2.71752	1.44229	up	ADAMTS5	ADAM metallopeptidase with thrombospondin type 1 motif, 5	Homo sapiens ADAM metallopeptidase with thrombospondin type 1 motif, 5 (ADAMTS5), mRNA [NM_007038]	chr21:28290319-28290260	hs|21q21.3
2.71677	2.71677	1.44189	up	C4BPB	complement component 4 binding protein, beta	Homo sapiens complement component 4 binding protein, beta (C4BPB), transcript variant 1, mRNA [NM_000716]	chr1:207263755-207263814	hs|1q32.2
2.71644	2.71644	1.44172	up	SLC7A5	solute carrier family 7 (amino acid transporter light chain, L system), member 5	Homo sapiens solute carrier family 7 (amino acid transporter light chain, L system), member 5 (SLC7A5), mRNA [NM_003486]	chr16:87863966-87863907	hs|16q24.2
2.71275	2.71275	1.43976	up	LINC01060	long intergenic non-protein coding RNA 1060	long intergenic non-protein coding RNA 1060 [Source:HGNC Symbol;Acc:HGNC:49081] [ENST00000513313]	chr4:189357884-189357943	hs|4q35.2
2.70647	2.70647	1.43641	up	PPP1R14C	protein phosphatase 1, regulatory (inhibitor) subunit 14C	Homo sapiens protein phosphatase 1, regulatory (inhibitor) subunit 14C (PPP1R14C), mRNA [NM_030949]	chr6:150570937-150570996	hs|6q25.1
2.70454	2.70454	1.43539	up	ST18	suppression of tumorigenicity 18, zinc finger	Homo sapiens suppression of tumorigenicity 18, zinc finger (ST18), mRNA [NM_014682]	chr8:53024119-53024060	hs|8q11.23
2.70243	-2.70243	-1.43426	down	LOC102724550	uncharacterized LOC102724550	Homo sapiens uncharacterized LOC102724550 (LOC102724550), long non-coding RNA [NR_110826]	chr3:177613551-177614397	hs|3q26.32
2.69856	2.69856	1.43219	up	G0S2	G0/G1 switch 2	Homo sapiens G0/G1 switch 2 (G0S2), mRNA [NM_015714]	chr1:209849597-209849656	hs|1q32.2
2.69376	-2.69376	-1.42962	down	LMOD1	leiomodin 1 (smooth muscle)	Homo sapiens leiomodin 1 (smooth muscle) (LMOD1), mRNA [NM_012134]	chr1:201868749-201868690	hs|1q32.1
2.69268	2.69268	1.42904	up	GPAM	glycerol-3-phosphate acyltransferase, mitochondrial	glycerol-3-phosphate acyltransferase, mitochondrial [Source:HGNC Symbol;Acc:HGNC:24865] [ENST00000369425]	chr10:113913749-113913690	hs|10q25.2
2.69217	-2.69217	-1.42877	down	PHOSPHO2-KLHL23	PHOSPHO2-KLHL23 readthrough	Homo sapiens PHOSPHO2-KLHL23 readthrough (PHOSPHO2-KLHL23), mRNA [NM_001199290]	chr2:170608203-170608262	hs|2q31.1
2.69196	-2.69196	-1.42866	down	TCF7L1	transcription factor 7-like 1 (T-cell specific, HMG-box)	Homo sapiens transcription factor 7-like 1 (T-cell specific, HMG-box) (TCF7L1), mRNA [NM_031283]	chr2:85536678-85536737	hs|2p11.2
2.68996	2.68996	1.42759	up	CPA3	carboxypeptidase A3 (mast cell)	Homo sapiens carboxypeptidase A3 (mast cell) (CPA3), mRNA [NM_001870]	chr3:148614465-148614524	hs|3q24
2.68725	2.68725	1.42613	up	NTNG1	netrin G1	Homo sapiens netrin G1 (NTNG1), transcript variant 3, mRNA [NM_014917]	chr1:107867420-107867479	hs|1p13.3
2.67811	-2.67811	-1.42122	down	GS1-259H13.2	transmembrane protein 225-like	Homo sapiens transmembrane protein 225-like (GS1-259H13.2), transcript variant 1, mRNA [NM_001195541]	chr7:99208202-99208261	hs|7q22.1
2.67792	2.67792	1.42111	up	COL28A1	collagen, type XXVIII, alpha 1	Homo sapiens collagen, type XXVIII, alpha 1 (COL28A1), mRNA [NM_001037763]	chr7:7398303-7398244	hs|7p21.3
2.67511	2.67511	1.4196	up	CMPK2	cytidine monophosphate (UMP-CMP) kinase 2, mitochondrial	Homo sapiens cytidine monophosphate (UMP-CMP) kinase 2, mitochondrial (CMPK2), transcript variant 1, mRNA [NM_207315]	chr2:6988526-6988467	hs|2p25.2
2.67386	2.67386	1.41893	up	C7orf66	chromosome 7 open reading frame 66	Homo sapiens chromosome 7 open reading frame 66 (C7orf66), mRNA [NM_001024607]	chr7:108524120-108524061	hs|7q31.1
2.67299	-2.67299	-1.41845	down	GLIS2	GLIS family zinc finger 2	Homo sapiens GLIS family zinc finger 2 (GLIS2), mRNA [NM_032575]	chr16:4389536-4389595	hs|16p13.3
2.67132	2.67132	1.41755	up	FAM189A2	family with sequence similarity 189, member A2	Homo sapiens family with sequence similarity 189, member A2 (FAM189A2), transcript variant 1, mRNA [NM_004816]	chr9:72007284-72007343	hs|9q21.11
2.66981	2.66981	1.41674	up	HAS1	hyaluronan synthase 1	Homo sapiens hyaluronan synthase 1 (HAS1), transcript variant 1, mRNA [NM_001523]	chr19:52220281-52220222	hs|19q13.41
2.66804	-2.66804	-1.41578	down	HR	hair growth associated	Homo sapiens hair growth associated (HR), transcript variant 1, mRNA [NM_005144]	chr8:21972023-21971964	hs|8p21.3
2.66374	-2.66374	-1.41345	down	SETBP1	SET binding protein 1	Homo sapiens SET binding protein 1 (SETBP1), transcript variant 2, mRNA [NM_001130110]	chr18:42456659-42456718	hs|18q12.3
2.65524	-2.65524	-1.40884	down	LEPR	leptin receptor	Homo sapiens leptin receptor (LEPR), transcript variant 3, mRNA [NM_001003679]	chr1:66100649-66100708	hs|1p31.3
2.64807	-2.64807	-1.40494	down	ACVRL1	activin A receptor type II-like 1	Homo sapiens activin A receptor type II-like 1 (ACVRL1), transcript variant 1, mRNA [NM_000020]	chr12:52317034-52317093	hs|12q13.13
2.64544	-2.64544	-1.40351	down	COL4A4	collagen, type IV, alpha 4	Homo sapiens collagen, type IV, alpha 4 (COL4A4), mRNA [NM_000092]	chr2:227867523-227867464	hs|2q36.3
2.64532	-2.64532	-1.40344	down	C10orf10	chromosome 10 open reading frame 10	Homo sapiens chromosome 10 open reading frame 10 (C10orf10), mRNA [NM_007021]	chr10:45471769-45471710	hs|10q11.21
2.64035	-2.64035	-1.40073	down	DPF3	D4, zinc and double PHD fingers, family 3	Homo sapiens D4, zinc and double PHD fingers, family 3 (DPF3), transcript variant 4, mRNA [NM_001280544]	chr14:73128643-73128584	hs|14q24.2
2.63929	-2.63929	-1.40015	down	KIAA1841	KIAA1841	Homo sapiens KIAA1841 (KIAA1841), transcript variant 1, mRNA [NM_001129993]	chr2:61350543-61350602	hs|2p15
2.63911	-2.63911	-1.40005	down	LPA	lipoprotein, Lp(a)	Homo sapiens lipoprotein, Lp(a) (LPA), mRNA [NM_005577]	chr6:160966519-160963829	hs|6q25.3
2.63346	-2.63346	-1.39696	down	SOX11	SRY (sex determining region Y)-box 11	Homo sapiens SRY (sex determining region Y)-box 11 (SOX11), mRNA [NM_003108]	chr2:5841428-5841487	hs|2p25.2
2.63182	2.63182	1.39606	up	TIMP4	TIMP metallopeptidase inhibitor 4	Homo sapiens TIMP metallopeptidase inhibitor 4 (TIMP4), mRNA [NM_003256]	chr3:12194787-12194728	hs|3p25.2
2.63037	2.63037	1.39527	up	CYP2S1	cytochrome P450, family 2, subfamily S, polypeptide 1	cytochrome P450, family 2, subfamily S, polypeptide 1 [Source:HGNC Symbol;Acc:HGNC:15654] [ENST00000310054]	chr19:41713082-41713141	hs|19q13.2
2.62781	2.62781	1.39386	up	LOC100128568	uncharacterized LOC100128568	Homo sapiens uncharacterized LOC100128568 (LOC100128568), long non-coding RNA [NR_046376]	chr19:6020315-6020374	hs|19p13.3
2.61625	-2.61625	-1.3875	down	DMD	dystrophin	Homo sapiens dystrophin (DMD), transcript variant Dp427p2, mRNA [NM_004010]	chrX:31137408-31137349	hs|Xp21.2
2.61264	-2.61264	-1.38551	down	STON1	stonin 1	stonin 1 [Source:HGNC Symbol;Acc:HGNC:17003] [ENST00000484110]	chr2:48758983-48759042	hs|2p16.3
2.61244	-2.61244	-1.3854	down	PALM	paralemmin	Homo sapiens paralemmin (PALM), transcript variant 1, mRNA [NM_002579]	chr19:748269-748328	hs|19p13.3
2.61019	-2.61019	-1.38415	down	GAP43	growth associated protein 43	Homo sapiens growth associated protein 43 (GAP43), transcript variant 2, mRNA [NM_002045]	chr3:115439985-115440044	hs|3q13.31
2.60978	-2.60978	-1.38393	down	YIPF4	Yip1 domain family, member 4	Yip1 domain family, member 4 [Source:HGNC Symbol;Acc:HGNC:28145] [ENST00000238831]	chr2:32538729-32538788	hs|2p22.3
2.60708	2.60708	1.38244	up	LOC102477328	uncharacterized LOC102477328	Homo sapiens uncharacterized LOC102477328 (LOC102477328), long non-coding RNA [NR_105007]	chr5:71870050-71869991	hs|5q13.2
2.60465	-2.60465	-1.38109	down	SRY	sex determining region Y	Homo sapiens sex determining region Y (SRY), mRNA [NM_003140]	chrY:2655642-2655583	hs|Yp11.31
2.60137	-2.60137	-1.37927	down	MATN3	matrilin 3	Homo sapiens matrilin 3 (MATN3), mRNA [NM_002381]	chr2:20192429-20192370	hs|2p24.1
2.60023	-2.60023	-1.37864	down	LINC01273	long intergenic non-protein coding RNA 1273	Homo sapiens long intergenic non-protein coding RNA 1273 (LINC01273), long non-coding RNA [NR_109943]	chr20:48792911-48792970	hs|20q13.13
2.59738	2.59738	1.37705	up	lnc-KIAA0020-1	lnc-KIAA0020-1:2	LNCipedia lincRNA (lnc-KIAA0020-1), lincRNA [lnc-KIAA0020-1:2]	chr9:2523152-2523093	hs|9p24.2
2.59719	2.59719	1.37695	up	IL7R	interleukin 7 receptor	Homo sapiens interleukin 7 receptor (IL7R), transcript variant 1, mRNA [NM_002185]	chr5:35876781-35876840	hs|5p13.2
2.59681	2.59681	1.37674	up	CCRL2	chemokine (C-C motif) receptor-like 2	Homo sapiens chemokine (C-C motif) receptor-like 2 (CCRL2), transcript variant 1, mRNA [NM_003965]	chr3:46450202-46450261	hs|3p21.31
2.59488	2.59488	1.37567	up	VSTM2A	V-set and transmembrane domain containing 2A	Homo sapiens V-set and transmembrane domain containing 2A (VSTM2A), transcript variant 1, mRNA [NM_182546]	chr7:54636760-54636819	hs|7p11.2
2.59323	-2.59323	-1.37475	down	MOXD1	monooxygenase, DBH-like 1	Homo sapiens monooxygenase, DBH-like 1 (MOXD1), mRNA [NM_015529]	chr6:132617445-132617386	hs|6q23.2
2.59304	-2.59304	-1.37464	down	CSDC2	cold shock domain containing C2, RNA binding	Homo sapiens cold shock domain containing C2, RNA binding (CSDC2), mRNA [NM_014460]	chr22:41972138-41972197	hs|22q13.2
2.58918	2.58918	1.3725	up	OR6N2	olfactory receptor, family 6, subfamily N, member 2	Homo sapiens olfactory receptor, family 6, subfamily N, member 2 (OR6N2), mRNA [NM_001005278]	chr1:158746531-158746472	hs|1q23.1
2.58649	2.58649	1.37099	up	ERMN	ermin, ERM-like protein	ermin, ERM-like protein [Source:HGNC Symbol;Acc:HGNC:29208] [ENST00000411762]	chr2:158181242-158181183	hs|2q24.1
2.58552	-2.58552	-1.37045	down	MKX	mohawk homeobox	Homo sapiens mohawk homeobox (MKX), transcript variant 1, mRNA [NM_173576]	chr10:27962388-27962329	hs|10p12.1
2.58196	2.58196	1.36846	up	TRPM6	transient receptor potential cation channel, subfamily M, member 6	Homo sapiens transient receptor potential cation channel, subfamily M, member 6 (TRPM6), transcript variant a, mRNA [NM_017662]	chr9:77449018-77448959	hs|9q21.13
2.57852	-2.57852	-1.36655	down	TBC1D24	TBC1 domain family, member 24	Homo sapiens TBC1 domain family, member 24 (TBC1D24), transcript variant 2, mRNA [NM_020705]	chr16:2553251-2553310	hs|16p13.3
2.57359	2.57359	1.36378	up	CCL20	chemokine (C-C motif) ligand 20	Homo sapiens chemokine (C-C motif) ligand 20 (CCL20), transcript variant 1, mRNA [NM_004591]	chr2:228681100-228681836	hs|2q36.3
2.57166	2.57166	1.3627	up	LGI4	leucine-rich repeat LGI family, member 4	Homo sapiens leucine-rich repeat LGI family, member 4 (LGI4), mRNA [NM_139284]	chr19:35615711-35615652	hs|19q13.12
2.57157	-2.57157	-1.36265	down	PPP1R12B	protein phosphatase 1, regulatory subunit 12B	Homo sapiens protein phosphatase 1, regulatory subunit 12B (PPP1R12B), transcript variant 1, mRNA [NM_002481]	chr1:202557518-202557577	hs|1q32.1
2.56889	-2.56889	-1.36115	down	VSNL1	visinin-like 1	Homo sapiens visinin-like 1 (VSNL1), mRNA [NM_003385]	chr2:17837224-17837283	hs|2p24.2
2.56486	-2.56486	-1.35888	down	DNASE1	deoxyribonuclease I	deoxyribonuclease I [Source:HGNC Symbol;Acc:HGNC:2956] [ENST00000570769]	chr16:3662002-3690769	hs|16p13.3
2.55871	2.55871	1.35541	up	OR5B21	olfactory receptor, family 5, subfamily B, member 21	Homo sapiens olfactory receptor, family 5, subfamily B, member 21 (OR5B21), mRNA [NM_001005218]	chr11:58274709-58274650	hs|11q12.1
2.55531	-2.55531	-1.3535	down	ABRA	actin-binding Rho activating protein	Homo sapiens actin-binding Rho activating protein (ABRA), mRNA [NM_139166]	chr8:107771790-107771731	hs|8q23.1
2.55527	-2.55527	-1.35347	down	ATP6AP1L	ATPase, H+ transporting, lysosomal accessory protein 1-like	Homo sapiens ATPase, H+ transporting, lysosomal accessory protein 1-like (ATP6AP1L), mRNA [NM_001017971]	chr5:81614067-81614126	hs|5q14.2
2.55082	-2.55082	-1.35096	down	ASB2	ankyrin repeat and SOCS box containing 2	Homo sapiens ankyrin repeat and SOCS box containing 2 (ASB2), transcript variant 2, mRNA [NM_016150]	chr14:94400660-94400601	hs|14q32.12
2.55017	2.55017	1.35059	up	ATF3	activating transcription factor 3	Homo sapiens activating transcription factor 3 (ATF3), transcript variant 4, mRNA [NM_001040619]	chr1:212792837-212792896	hs|1q32.3
2.5494	-2.5494	-1.35016	down	KIAA1958	KIAA1958	Homo sapiens KIAA1958 (KIAA1958), transcript variant 1, mRNA [NM_001287036]	chr9:115422644-115422703	hs|9q32
2.54755	2.54755	1.34911	up	MMP13	matrix metallopeptidase 13 (collagenase 3)	Homo sapiens matrix metallopeptidase 13 (collagenase 3) (MMP13), mRNA [NM_002427]	chr11:102813832-102813773	hs|11q22.2
2.54347	2.54347	1.3468	up	CYP2C19	cytochrome P450, family 2, subfamily C, polypeptide 19	Homo sapiens cytochrome P450, family 2, subfamily C, polypeptide 19 (CYP2C19), mRNA [NM_000769]	chr10:96612576-96612635	hs|10q23.33
2.5393	-2.5393	-1.34443	down	LINC01534	long intergenic non-protein coding RNA 1534	long intergenic non-protein coding RNA 1534 [Source:HGNC Symbol;Acc:HGNC:51281] [ENST00000590952]	chr19:37177388-37177329	hs|19q13.12
2.5374	-2.5374	-1.34335	down	LOC102724357	uncharacterized LOC102724357	PREDICTED: Homo sapiens uncharacterized LOC102724357 (LOC102724357), ncRNA [XR_426116]	chr6:169469449-169469508	hs|6q27
2.53219	2.53219	1.34039	up	PRSS37	protease, serine, 37	Homo sapiens protease, serine, 37 (PRSS37), transcript variant 1, mRNA [NM_001008270]	chr7:141536238-141536179	hs|7q34
2.53173	2.53173	1.34012	up	BEST1	bestrophin 1	Homo sapiens bestrophin 1 (BEST1), transcript variant 1, mRNA [NM_004183]	chr11:61730281-61730340	hs|11q12.3
2.53006	2.53006	1.33917	up	ITGB3	integrin, beta 3 (platelet glycoprotein IIIa, antigen CD61)	Homo sapiens integrin, beta 3 (platelet glycoprotein IIIa, antigen CD61) (ITGB3), mRNA [NM_000212]	chr17:45389027-45389086	hs|17q21.32
2.526	2.526	1.33685	up	BMP5	bone morphogenetic protein 5	Homo sapiens bone morphogenetic protein 5 (BMP5), mRNA [NM_021073]	chr6:55620460-55620401	hs|6p12.1
2.52211	-2.52211	-1.33463	down	lnc-PTGES-1	lnc-PTGES-1:1	Q53D73_LOTJA (Q53D73) Fe-superoxide dismutase 1 , partial (5%) [THC2641828]	chr9:132475232-132475175	hs|9q34.11
2.5214	-2.5214	-1.33423	down	NR1I2	nuclear receptor subfamily 1, group I, member 2	Homo sapiens nuclear receptor subfamily 1, group I, member 2 (NR1I2), transcript variant 1, mRNA [NM_003889]	chr3:119537112-119537171	hs|3q13.33
2.52114	-2.52114	-1.33408	down	FBXO11	F-box protein 11	F-box protein 11 [Source:HGNC Symbol;Acc:HGNC:13590] [ENST00000434234]	chr2:48016520-48016461	hs|2p16.3
2.52088	2.52088	1.33393	up	MT2A	metallothionein 2A	Homo sapiens metallothionein 2A (MT2A), mRNA [NM_005953]	chr16:56643332-56643391	hs|16q12.2
2.52028	-2.52028	-1.33359	down	SETBP1	SET binding protein 1	Homo sapiens SET binding protein 1 (SETBP1), transcript variant 1, mRNA [NM_015559]	chr18:42644693-42644752	hs|18q12.3
2.51711	-2.51711	-1.33177	down	ST8SIA6	ST8 alpha-N-acetyl-neuraminide alpha-2,8-sialyltransferase 6	Homo sapiens ST8 alpha-N-acetyl-neuraminide alpha-2,8-sialyltransferase 6 (ST8SIA6), mRNA [NM_001004470]	chr10:17362735-17362676	hs|10p12.33
2.51363	2.51363	1.32977	up	DHRS9	dehydrogenase/reductase (SDR family) member 9	Homo sapiens dehydrogenase/reductase (SDR family) member 9 (DHRS9), transcript variant 3, mRNA [NM_001142270]	chr2:169952375-169952434	hs|2q31.1
2.51269	-2.51269	-1.32923	down	VSTM2L	V-set and transmembrane domain containing 2 like	Homo sapiens V-set and transmembrane domain containing 2 like (VSTM2L), mRNA [NM_080607]	chr20:36573562-36573621	hs|20q11.23
2.5117	-2.5117	-1.32866	down	CPXM2	carboxypeptidase X (M14 family), member 2	Homo sapiens carboxypeptidase X (M14 family), member 2 (CPXM2), mRNA [NM_198148]	chr10:125514239-125514180	hs|10q26.13
2.50912	-2.50912	-1.32718	down	ADAMTSL1	ADAMTS-like 1	Homo sapiens ADAMTS-like 1 (ADAMTSL1), transcript variant 2, mRNA [NM_052866]	chr9:18684741-18684800	hs|9p22.1
2.50889	2.50889	1.32705	up	SPX	spexin hormone	spexin hormone [Source:HGNC Symbol;Acc:HGNC:28139] [ENST00000256969]	chr12:21684967-21685026	hs|12p12.1
2.50724	-2.50724	-1.3261	down	RARB	retinoic acid receptor, beta	Homo sapiens retinoic acid receptor, beta (RARB), transcript variant 1, mRNA [NM_000965]	chr3:25636109-25636168	hs|3p24.2
2.49987	-2.49987	-1.32185	down	THSD4	thrombospondin, type I, domain containing 4	Homo sapiens thrombospondin, type I, domain containing 4 (THSD4), transcript variant 1, mRNA [NM_024817]	chr15:72075663-72075722	hs|15q23
2.49743	2.49743	1.32044	up	CACNA2D3	calcium channel, voltage-dependent, alpha 2/delta subunit 3	Homo sapiens calcium channel, voltage-dependent, alpha 2/delta subunit 3 (CACNA2D3), mRNA [NM_018398]	chr3:55021774-55038842	hs|3p14.3
2.49681	-2.49681	-1.32009	down	SLC15A2	solute carrier family 15 (oligopeptide transporter), member 2	Homo sapiens solute carrier family 15 (oligopeptide transporter), member 2 (SLC15A2), transcript variant 1, mRNA [NM_021082]	chr3:121650486-121650545	hs|3q13.33
2.49323	-2.49323	-1.31802	down	KCND1	potassium channel, voltage gated Shal related subfamily D, member 1	Homo sapiens potassium channel, voltage gated Shal related subfamily D, member 1 (KCND1), mRNA [NM_004979]	chrX:48819729-48819670	hs|Xp11.23
2.49302	-2.49302	-1.31789	down	HOXD3	homeobox D3	homeobox D3 [Source:HGNC Symbol;Acc:HGNC:5137] [ENST00000459979]	chr2:177004062-177004121	hs|2q31.1
2.49147	2.49147	1.317	up	SECTM1	secreted and transmembrane 1	Homo sapiens secreted and transmembrane 1 (SECTM1), mRNA [NM_003004]	chr17:80279241-80279182	hs|17q25.3
2.48965	2.48965	1.31594	up	IGFBP1	insulin-like growth factor binding protein 1	Homo sapiens insulin-like growth factor binding protein 1 (IGFBP1), mRNA [NM_000596]	chr7:45932966-45933025	hs|7p12.3
2.4891	-2.4891	-1.31562	down	RUNDC3B	RUN domain containing 3B	Homo sapiens RUN domain containing 3B (RUNDC3B), transcript variant 1, mRNA [NM_138290]	chr7:87459421-87459480	hs|7q21.12
2.48844	2.48844	1.31524	up	KRTAP13-3	keratin associated protein 13-3	Homo sapiens keratin associated protein 13-3 (KRTAP13-3), mRNA [NM_181622]	chr21:31797770-31797711	hs|21q22.11
2.48723	2.48723	1.31454	up	GLB1L3	galactosidase, beta 1-like 3	galactosidase, beta 1-like 3 [Source:HGNC Symbol;Acc:HGNC:25147] [ENST00000389887]	chr11:134175142-134175201	hs|11q25
2.48577	2.48577	1.3137	up	GLIPR1L2	GLI pathogenesis-related 1 like 2	Homo sapiens GLI pathogenesis-related 1 like 2 (GLIPR1L2), transcript variant 2, mRNA [NM_152436]	chr12:75816720-75816779	hs|12q21.2
2.48543	2.48543	1.3135	up	FAM83C	family with sequence similarity 83, member C	Homo sapiens family with sequence similarity 83, member C (FAM83C), mRNA [NM_178468]	chr20:33874427-33874368	hs|20q11.22
2.48518	2.48518	1.31335	up	OR51I1	olfactory receptor, family 51, subfamily I, member 1	Homo sapiens olfactory receptor, family 51, subfamily I, member 1 (OR51I1), mRNA [NM_001005288]	chr11:5461864-5461805	hs|11p15.4
2.4835	2.4835	1.31238	up	TTC29	tetratricopeptide repeat domain 29	Homo sapiens tetratricopeptide repeat domain 29 (TTC29), transcript variant 1, mRNA [NM_001300761]	chr4:147788705-147755048	hs|4q31.22
2.48225	-2.48225	-1.31165	down	TMEM249	transmembrane protein 249	Homo sapiens transmembrane protein 249 (TMEM249), transcript variant 4, mRNA [NM_001280561]	chr8:145577181-145577122	hs|8q24.3
2.48142	-2.48142	-1.31117	down	HES6	hes family bHLH transcription factor 6	Homo sapiens hes family bHLH transcription factor 6 (HES6), transcript variant 1, mRNA [NM_018645]	chr2:239147006-239146947	hs|2q37.3
2.48128	2.48128	1.31108	up	lnc-MMRN1-1	lnc-MMRN1-1:2	Homo sapiens cDNA FLJ41896 fis, clone OCBBF2032599. [AK123890]	chr4:90761549-90761608	hs|4q22.1
2.47801	2.47801	1.30918	up	MYPN	myopalladin	Homo sapiens myopalladin (MYPN), transcript variant 1, mRNA [NM_032578]	chr10:69918312-69918371	hs|10q21.3
2.47728	2.47728	1.30876	up	PAPPA2	pappalysin 2	Homo sapiens pappalysin 2 (PAPPA2), transcript variant 1, mRNA [NM_020318]	chr1:176811764-176811823	hs|1q25.2
2.47656	-2.47656	-1.30834	down	KLHL13	kelch-like family member 13	Homo sapiens kelch-like family member 13 (KLHL13), transcript variant 1, mRNA [NM_033495]	chrX:117032474-117032415	hs|Xq24
2.47544	-2.47544	-1.30768	down	TSPAN9	tetraspanin 9	Homo sapiens tetraspanin 9 (TSPAN9), transcript variant 1, mRNA [NM_006675]	chr12:3394900-3394959	hs|12p13.32
2.47433	-2.47433	-1.30704	down	RNF222	ring finger protein 222	Homo sapiens ring finger protein 222 (RNF222), mRNA [NM_001146684]	chr17:8294097-8294038	hs|17p13.1
2.46825	2.46825	1.30349	up	AIM2	absent in melanoma 2	Homo sapiens absent in melanoma 2 (AIM2), mRNA [NM_004833]	chr1:159033365-159033306	hs|1q23.1
2.46627	-2.46627	-1.30233	down	SAA1	serum amyloid A1	Homo sapiens serum amyloid A1 (SAA1), transcript variant 1, mRNA [NM_000331]	chr11:18290868-18291310	hs|11p15.1
2.46577	2.46577	1.30204	up	NTNG1	netrin G1	Homo sapiens netrin G1 (NTNG1), transcript variant 1, mRNA [NM_001113226]	chr1:108024337-108024396	hs|1p13.3
2.46455	2.46455	1.30132	up	PTGS2	prostaglandin-endoperoxide synthase 2 (prostaglandin G/H synthase and cyclooxygenase)	Homo sapiens prostaglandin-endoperoxide synthase 2 (prostaglandin G/H synthase and cyclooxygenase) (PTGS2), mRNA [NM_000963]	chr1:186641528-186641469	hs|1q31.1
2.46374	-2.46374	-1.30085	down	SYT7	synaptotagmin VII	Homo sapiens synaptotagmin VII (SYT7), transcript variant 1, mRNA [NM_001252065]	chr11:61282853-61282794	hs|11q12.2
2.45916	2.45916	1.29817	up	LACC1	laccase (multicopper oxidoreductase) domain containing 1	Homo sapiens laccase (multicopper oxidoreductase) domain containing 1 (LACC1), transcript variant 2, mRNA [NM_153218]	chr13:44464331-44464390	hs|13q14.11
2.45888	2.45888	1.298	up	SLC8A3	solute carrier family 8 (sodium/calcium exchanger), member 3	Homo sapiens solute carrier family 8 (sodium/calcium exchanger), member 3 (SLC8A3), transcript variant c, mRNA [NM_183002]	chr14:70511189-70511130	hs|14q24.2
2.45536	-2.45536	-1.29593	down	OLFML2A	olfactomedin-like 2A	Homo sapiens olfactomedin-like 2A (OLFML2A), transcript variant 1, mRNA [NM_182487]	chr9:127577020-127577079	hs|9q33.3
2.452	-2.452	-1.29396	down	OMG	oligodendrocyte myelin glycoprotein	Homo sapiens oligodendrocyte myelin glycoprotein (OMG), mRNA [NM_002544]	chr17:29621953-29621894	hs|17q11.2
2.45	2.45	1.29278	up	FGF10	fibroblast growth factor 10	Homo sapiens fibroblast growth factor 10 (FGF10), mRNA [NM_004465]	chr5:44310554-44305261	hs|5p12
2.44773	2.44773	1.29145	up	B3GALT5	UDP-Gal:betaGlcNAc beta 1,3-galactosyltransferase, polypeptide 5	Homo sapiens UDP-Gal:betaGlcNAc beta 1,3-galactosyltransferase, polypeptide 5 (B3GALT5), transcript variant 3, mRNA [NM_033171]	chr21:41033636-41033695	hs|21q22.2
2.44663	2.44663	1.29079	up	MTNR1A	melatonin receptor 1A	Homo sapiens melatonin receptor 1A (MTNR1A), mRNA [NM_005958]	chr4:187455217-187455159	hs|4q35.2
2.44601	-2.44601	-1.29043	down	CYP26A1	cytochrome P450, family 26, subfamily A, polypeptide 1	Homo sapiens cytochrome P450, family 26, subfamily A, polypeptide 1 (CYP26A1), transcript variant 2, mRNA [NM_057157]	chr10:94837013-94837072	hs|10q23.33
2.44565	-2.44565	-1.29022	down	ELN	elastin	Homo sapiens elastin (ELN), transcript variant 13, mRNA [NM_001278939]	chr7:73483599-73483658	hs|7q11.23
2.44283	-2.44283	-1.28855	down	LINC01450	long intergenic non-protein coding RNA 1450	Homo sapiens long intergenic non-protein coding RNA 1450 (LINC01450), long non-coding RNA [NR_110831]	chr7:41004347-41004288	hs|7p14.1
2.44223	2.44223	1.2882	up	DNER	delta/notch-like EGF repeat containing	Homo sapiens delta/notch-like EGF repeat containing (DNER), mRNA [NM_139072]	chr2:230222968-230222909	hs|2q36.3
2.44216	-2.44216	-1.28816	down	PCDHB7	protocadherin beta 7	Homo sapiens protocadherin beta 7 (PCDHB7), mRNA [NM_018940]	chr5:140555065-140555124	hs|5q31.3
2.44159	2.44159	1.28782	up	SPRR2A	small proline-rich protein 2A	Homo sapiens small proline-rich protein 2A (SPRR2A), mRNA [NM_005988]	chr1:153028658-153028599	hs|1q21.3
2.44146	-2.44146	-1.28775	down	PI16	peptidase inhibitor 16	Homo sapiens peptidase inhibitor 16 (PI16), transcript variant 1, mRNA [NM_153370]	chr6:36932552-36932611	hs|6p21.2
2.43702	-2.43702	-1.28512	down	SLC51A	solute carrier family 51, alpha subunit	Homo sapiens solute carrier family 51, alpha subunit (SLC51A), mRNA [NM_152672]	chr3:195959986-195960045	hs|3q29
2.43666	2.43666	1.2849	up	MUC17	mucin 17, cell surface associated	Homo sapiens mucin 17, cell surface associated (MUC17), mRNA [NM_001040105]	chr7:100677854-100677913	hs|7q22.1
2.43321	-2.43321	-1.28286	down	RAB9B	RAB9B, member RAS oncogene family	Homo sapiens RAB9B, member RAS oncogene family (RAB9B), mRNA [NM_016370]	chrX:103078011-103077952	hs|Xq22.2
2.43233	-2.43233	-1.28234	down	DDIT4L	DNA-damage-inducible transcript 4-like	Homo sapiens DNA-damage-inducible transcript 4-like (DDIT4L), mRNA [NM_145244]	chr4:101107139-101107080	hs|4q24
2.42782	-2.42782	-1.27966	down	LIMS2	LIM and senescent cell antigen-like domains 2	Homo sapiens LIM and senescent cell antigen-like domains 2 (LIMS2), transcript variant 5, mRNA [NM_001161404]	chr2:128396064-128396005	hs|2q14.3
2.42501	-2.42501	-1.27799	down	HESX1	HESX homeobox 1	Homo sapiens HESX homeobox 1 (HESX1), mRNA [NM_003865]	chr3:57232831-57232512	hs|3p14.3
2.42397	2.42397	1.27737	up	OR5T3	olfactory receptor, family 5, subfamily T, member 3	Homo sapiens olfactory receptor, family 5, subfamily T, member 3 (OR5T3), mRNA [NM_001004747]	chr11:56020479-56020538	hs|11q12.1
2.42017	2.42017	1.27511	up	FGB	fibrinogen beta chain	Homo sapiens fibrinogen beta chain (FGB), transcript variant 1, mRNA [NM_005141]	chr4:155492029-155492088	hs|4q31.3
2.41716	-2.41716	-1.27331	down	lnc-AF131215.2.1-1	lnc-AF131215.2.1-1:1	Homo sapiens primary neuroblastoma cDNA, clone:Nbla00437, full insert sequence. [AB073660]	chr8:10965890-10965831	hs|8p23.1
2.41649	-2.41649	-1.27292	down	SEMA4G	sema domain, immunoglobulin domain (Ig), transmembrane domain (TM) and short cytoplasmic domain, (semaphorin) 4G	sema domain, immunoglobulin domain (Ig), transmembrane domain (TM) and short cytoplasmic domain, (semaphorin) 4G [Source:HGNC Symbol;Acc:HGNC:10735] [ENST00000518244]	chr10:102729621-102729680	hs|10q24.31
2.41585	2.41585	1.27253	up	MUC4	mucin 4, cell surface associated	Homo sapiens mucin 4, cell surface associated (MUC4), transcript variant 1, mRNA [NM_018406]	chr3:195506369-195506310	hs|3q29
2.41394	-2.41394	-1.27139	down	RDM1	RAD52 motif containing 1	Homo sapiens RAD52 motif containing 1 (RDM1), transcript variant 1, mRNA [NM_145654]	chr17:34245357-34245298	hs|17q12
2.41314	-2.41314	-1.27091	down	PODN	podocan	Homo sapiens podocan (PODN), transcript variant 1, mRNA [NM_153703]	chr1:53547711-53547770	hs|1p32.3
2.40987	2.40987	1.26895	up	P2RY12	purinergic receptor P2Y, G-protein coupled, 12	Homo sapiens purinergic receptor P2Y, G-protein coupled, 12 (P2RY12), transcript variant 1, mRNA [NM_022788]	chr3:151055793-151055734	hs|3q25.1
2.40783	-2.40783	-1.26774	down	STEAP4	STEAP family member 4	Homo sapiens STEAP family member 4 (STEAP4), transcript variant 2, mRNA [NM_001205315]	chr7:87907978-87907919	hs|7q21.12
2.40451	-2.40451	-1.26574	down	C17orf96	chromosome 17 open reading frame 96	Homo sapiens chromosome 17 open reading frame 96 (C17orf96), mRNA [NM_001130677]	chr17:36828068-36828009	hs|17q12
2.40115	-2.40115	-1.26373	down	SARDH	sarcosine dehydrogenase	Homo sapiens sarcosine dehydrogenase (SARDH), transcript variant 1, mRNA [NM_007101]	chr9:136535727-136531955	hs|9q34.2
2.40036	2.40036	1.26325	up	IL1RN	interleukin 1 receptor antagonist	Homo sapiens interleukin 1 receptor antagonist (IL1RN), transcript variant 4, mRNA [NM_173843]	chr2:113891531-113891590	hs|2q13
2.3974	-2.3974	-1.26147	down	ACBD7	acyl-CoA binding domain containing 7	Homo sapiens acyl-CoA binding domain containing 7 (ACBD7), mRNA [NM_001039844]	chr10:15118154-15118095	hs|10p13
2.39728	-2.39728	-1.2614	down	LZTS1	leucine zipper, putative tumor suppressor 1	Homo sapiens leucine zipper, putative tumor suppressor 1 (LZTS1), mRNA [NM_021020]	chr8:20103761-20103702	hs|8p21.3
2.39663	-2.39663	-1.26101	down	lnc-PHF10-1	lnc-PHF10-1:3	LNCipedia lincRNA (lnc-PHF10-1), lincRNA [lnc-PHF10-1:3]	chr6:170125386-170125327	hs|6q27
2.39639	-2.39639	-1.26087	down	PDGFRL	platelet-derived growth factor receptor-like	Homo sapiens platelet-derived growth factor receptor-like (PDGFRL), mRNA [NM_006207]	chr8:17500476-17500535	hs|8p22
2.39527	2.39527	1.26019	up	OR51M1	olfactory receptor, family 51, subfamily M, member 1	Homo sapiens olfactory receptor, family 51, subfamily M, member 1 (OR51M1), mRNA [NM_001004756]	chr11:5411550-5411609	hs|11p15.4
2.39457	2.39457	1.25976	up	PPP1R1A	protein phosphatase 1, regulatory (inhibitor) subunit 1A	Homo sapiens protein phosphatase 1, regulatory (inhibitor) subunit 1A (PPP1R1A), mRNA [NM_006741]	chr12:54973524-54973465	hs|12q13.2
2.39408	2.39408	1.25947	up	LOC101927849	uncharacterized LOC101927849	Homo sapiens uncharacterized LOC101927849 (LOC101927849), long non-coding RNA [NR_125887]	chr4:150199169-150199228	hs|4q31.23
2.39404	-2.39404	-1.25945	down	lnc-PKNOX1-1	lnc-PKNOX1-1:1	Homo sapiens cDNA: FLJ21265 fis, clone COL01584. [AK024918]	chr21:44376042-44376101	hs|21q22.3
2.39171	-2.39171	-1.25804	down	PADI1	peptidyl arginine deiminase, type I	Homo sapiens peptidyl arginine deiminase, type I (PADI1), mRNA [NM_013358]	chr1:17572442-17572501	hs|1p36.13
2.39171	-2.39171	-1.25804	down	GPR88	G protein-coupled receptor 88	Homo sapiens G protein-coupled receptor 88 (GPR88), mRNA [NM_022049]	chr1:101007457-101007516	hs|1p21.2
2.39087	-2.39087	-1.25753	down	UBOX5	U-box domain containing 5	Homo sapiens U-box domain containing 5 (UBOX5), transcript variant 1, mRNA [NM_014948]	chr20:3088346-3088287	hs|20p13
2.39041	2.39041	1.25726	up	SPATA16	spermatogenesis associated 16	Homo sapiens spermatogenesis associated 16 (SPATA16), mRNA [NM_031955]	chr3:172607207-172607148	hs|3q26.31
2.38889	2.38889	1.25634	up	AKR1B10	aldo-keto reductase family 1, member B10 (aldose reductase)	Homo sapiens aldo-keto reductase family 1, member B10 (aldose reductase) (AKR1B10), mRNA [NM_020299]	chr7:134225939-134225998	hs|7q33
2.3884	-2.3884	-1.25604	down	TMEM194B	transmembrane protein 194B	Homo sapiens transmembrane protein 194B (TMEM194B), mRNA [NM_001142645]	chr2:191371678-191371619	hs|2q32.2
2.38702	2.38702	1.25521	up	FRMPD4	FERM and PDZ domain containing 4	Homo sapiens FERM and PDZ domain containing 4 (FRMPD4), mRNA [NM_014728]	chrX:12739959-12740018	hs|Xp22.2
2.38595	-2.38595	-1.25456	down	NYNRIN	NYN domain and retroviral integrase containing	Homo sapiens NYN domain and retroviral integrase containing (NYNRIN), mRNA [NM_025081]	chr14:24887451-24887510	hs|14q12
2.38412	2.38412	1.25346	up	CHST1	carbohydrate (keratan sulfate Gal-6) sulfotransferase 1	Homo sapiens carbohydrate (keratan sulfate Gal-6) sulfotransferase 1 (CHST1), mRNA [NM_003654]	chr11:45670488-45670429	hs|11p11.2
2.37997	2.37997	1.25094	up	SI	sucrase-isomaltase (alpha-glucosidase)	Homo sapiens sucrase-isomaltase (alpha-glucosidase) (SI), mRNA [NM_001041]	chr3:164700096-164700037	hs|3q26.1
2.37791	2.37791	1.2497	up	CDCP1	CUB domain containing protein 1	Homo sapiens CUB domain containing protein 1 (CDCP1), transcript variant 1, mRNA [NM_022842]	chr3:45123898-45123839	hs|3p21.31
2.37767	-2.37767	-1.24955	down	ELANE	elastase, neutrophil expressed	Homo sapiens elastase, neutrophil expressed (ELANE), mRNA [NM_001972]	chr19:853356-855575	hs|19p13.3
2.37423	2.37423	1.24746	up	ASPA	aspartoacylase	Homo sapiens aspartoacylase (ASPA), transcript variant 1, mRNA [NM_000049]	chr17:3402456-3402515	hs|17p13.2
2.37421	-2.37421	-1.24745	down	CCDC36	coiled-coil domain containing 36	PREDICTED: Homo sapiens coiled-coil domain containing 36 (CCDC36), transcript variant X3, mRNA [XM_006713124]	chr3:49237185-49237244	hs|3p21.31
2.37209	-2.37209	-1.24616	down	TIGIT	T cell immunoreceptor with Ig and ITIM domains	Homo sapiens T cell immunoreceptor with Ig and ITIM domains (TIGIT), mRNA [NM_173799]	chr3:114028289-114028348	hs|3q13.31
2.36941	-2.36941	-1.24452	down	TMEM200C	transmembrane protein 200C	Homo sapiens transmembrane protein 200C (TMEM200C), mRNA [NM_001080209]	chr18:5890251-5890192	hs|18p11.31
2.36744	-2.36744	-1.24333	down	MAN1C1	mannosidase, alpha, class 1C, member 1	Homo sapiens mannosidase, alpha, class 1C, member 1 (MAN1C1), transcript variant 1, mRNA [NM_020379]	chr1:26110835-26110894	hs|1p36.11
2.36729	2.36729	1.24324	up	P2RY10	purinergic receptor P2Y, G-protein coupled, 10	Homo sapiens purinergic receptor P2Y, G-protein coupled, 10 (P2RY10), transcript variant 1, mRNA [NM_014499]	chrX:78216366-78216425	hs|Xq21.1
2.36485	2.36485	1.24175	up	TARP	TCR gamma alternate reading frame protein	Homo sapiens TCR gamma alternate reading frame protein (TARP), transcript variant 1, mRNA [NM_001003799]	chr7:38305037-38304978	hs|7p14.1
2.36254	-2.36254	-1.24034	down	PPP1R12B	protein phosphatase 1, regulatory subunit 12B	Homo sapiens protein phosphatase 1, regulatory subunit 12B (PPP1R12B), transcript variant 7, mRNA [NM_001197131]	chr1:202509288-202509347	hs|1q32.1
2.35659	2.35659	1.2367	up	CNIH3	cornichon family AMPA receptor auxiliary protein 3	Homo sapiens cornichon family AMPA receptor auxiliary protein 3 (CNIH3), mRNA [NM_152495]	chr1:224928164-224928223	hs|1q42.12
2.35443	-2.35443	-1.23538	down	SYNPO2	synaptopodin 2	Homo sapiens synaptopodin 2 (SYNPO2), transcript variant 2, mRNA [NM_001128933]	chr4:119958603-119958662	hs|4q26
2.35205	-2.35205	-1.23392	down	PCDHGA8	protocadherin gamma subfamily A, 8	Homo sapiens protocadherin gamma subfamily A, 8 (PCDHGA8), transcript variant 2, mRNA [NM_014004]	chr5:140774868-140774927	hs|5q31.3
2.34994	-2.34994	-1.23262	down	C1orf198	chromosome 1 open reading frame 198	Homo sapiens chromosome 1 open reading frame 198 (C1orf198), transcript variant 1, mRNA [NM_032800]	chr1:230973004-230972945	hs|1q42.2
2.34597	2.34597	1.23018	up	SPINK5	serine peptidase inhibitor, Kazal type 5	Homo sapiens serine peptidase inhibitor, Kazal type 5 (SPINK5), transcript variant 2, mRNA [NM_006846]	chr5:147516758-147516817	hs|5q32
2.34534	2.34534	1.2298	up	PROP1	PROP paired-like homeobox 1	Homo sapiens PROP paired-like homeobox 1 (PROP1), mRNA [NM_006261]	chr5:177419295-177419236	hs|5q35.3
2.34486	-2.34486	-1.2295	down	FBXL22	F-box and leucine-rich repeat protein 22	Homo sapiens F-box and leucine-rich repeat protein 22 (FBXL22), mRNA [NM_203373]	chr15:63894440-63894499	hs|15q22.31
2.34322	2.34322	1.22849	up	LINC00428	long intergenic non-protein coding RNA 428	Homo sapiens long intergenic non-protein coding RNA 428 (LINC00428), transcript variant 2, long non-coding RNA [NR_126389]	chr13:43416648-43416589	hs|13q14.11
2.34206	-2.34206	-1.22778	down	LOC100130642	uncharacterized LOC100130642	Homo sapiens cDNA FLJ42255 fis, clone TKIDN2009889. [AK124249]	chr2:46874449-46874508	hs|2p21
2.34139	-2.34139	-1.22737	down	MEAF6	MYST/Esa1-associated factor 6	Homo sapiens MYST/Esa1-associated factor 6 (MEAF6), transcript variant 1, mRNA [NM_022756]	chr1:37955906-37955847	hs|1p34.3
2.3408	-2.3408	-1.227	down	HUS1B	HUS1 checkpoint homolog b (S. pombe)	Homo sapiens HUS1 checkpoint homolog b (S. pombe) (HUS1B), mRNA [NM_148959]	chr6:656192-656133	hs|6p25.3
2.34064	2.34064	1.2269	up	VEGFA	vascular endothelial growth factor A	Homo sapiens vascular endothelial growth factor A (VEGFA), transcript variant 6, mRNA [NM_001025370]	chr6:43746223-43746634	hs|6p21.1
2.34051	2.34051	1.22682	up	ZNF750	zinc finger protein 750	Homo sapiens zinc finger protein 750 (ZNF750), mRNA [NM_024702]	chr17:80787421-80787362	hs|17q25.3
2.338	-2.338	-1.22528	down	LYVE1	lymphatic vessel endothelial hyaluronan receptor 1	Homo sapiens lymphatic vessel endothelial hyaluronan receptor 1 (LYVE1), mRNA [NM_006691]	chr11:10580104-10580045	hs|11p15.4
2.33796	-2.33796	-1.22525	down	MSLN	mesothelin	Homo sapiens mesothelin (MSLN), transcript variant 1, mRNA [NM_005823]	chr16:816418-816477	hs|16p13.3
2.33785	2.33785	1.22518	up	DUSP6	dual specificity phosphatase 6	Homo sapiens dual specificity phosphatase 6 (DUSP6), transcript variant 1, mRNA [NM_001946]	chr12:89742203-89742144	hs|12q21.33
2.33772	-2.33772	-1.2251	down	LINC00539	long intergenic non-protein coding RNA 539	Homo sapiens long intergenic non-protein coding RNA 539 (LINC00539), transcript variant 1, long non-coding RNA [NR_103840]	chr13:21877734-21877675	hs|13q12.11
2.336	-2.336	-1.22404	down	FAM131B	family with sequence similarity 131, member B	Homo sapiens family with sequence similarity 131, member B (FAM131B), transcript variant a, mRNA [NM_001031690]	chr7:143051036-143050977	hs|7q34
2.33365	-2.33365	-1.22259	down	RIMS1	regulating synaptic membrane exocytosis 1	Homo sapiens regulating synaptic membrane exocytosis 1 (RIMS1), transcript variant 1, mRNA [NM_014989]	chr6:73112421-73112480	hs|6q13
2.33299	2.33299	1.22218	up	ATF3	activating transcription factor 3	Homo sapiens activating transcription factor 3 (ATF3), transcript variant 4, mRNA [NM_001040619]	chr1:212793856-212793915	hs|1q32.3
2.32967	2.32967	1.22013	up	XAGE1B	X antigen family, member 1B	Homo sapiens X antigen family, member 1B (XAGE1B), transcript variant a, mRNA [NM_001097594]	chrX:52241141-52241200	hs|Xp11.22
2.32913	-2.32913	-1.21979	down	COL8A2	collagen, type VIII, alpha 2	Homo sapiens collagen, type VIII, alpha 2 (COL8A2), transcript variant 1, mRNA [NM_005202]	chr1:36560922-36560863	hs|1p34.3
2.32675	-2.32675	-1.21832	down	MN1	meningioma (disrupted in balanced translocation) 1	Homo sapiens meningioma (disrupted in balanced translocation) 1 (MN1), mRNA [NM_002430]	chr22:28145250-28145191	hs|22q12.1
2.32589	2.32589	1.21779	up	GALNT12	polypeptide N-acetylgalactosaminyltransferase 12	Homo sapiens polypeptide N-acetylgalactosaminyltransferase 12 (GALNT12), mRNA [NM_024642]	chr9:101608379-101611266	hs|9q22.33
2.32368	-2.32368	-1.21641	down	MROH9	maestro heat-like repeat family member 9	Homo sapiens maestro heat-like repeat family member 9 (MROH9), transcript variant 2, mRNA [NM_025063]	chr1:170967712-170967771	hs|1q24.3
2.32268	2.32268	1.21579	up	SMOX	spermine oxidase	Homo sapiens spermine oxidase (SMOX), transcript variant 1, mRNA [NM_175839]	chr20:4168300-4168359	hs|20p13
2.32216	-2.32216	-1.21547	down	FRY	furry homolog (Drosophila)	Homo sapiens furry homolog (Drosophila) (FRY), mRNA [NM_023037]	chr13:32691537-32691596	hs|13q13.1
2.32018	-2.32018	-1.21424	down	LOC100130417	uncharacterized LOC100130417	Homo sapiens cDNA FLJ39609 fis, clone SKNSH2008043. [AK096928]	chr1:855660-855601	hs|1p36.33
2.31976	2.31976	1.21398	up	TECTB	tectorin beta	Homo sapiens tectorin beta (TECTB), mRNA [NM_058222]	chr10:114045852-114045911	hs|10q25.2
2.319	-2.319	-1.2135	down	CLVS1	clavesin 1	Homo sapiens clavesin 1 (CLVS1), mRNA [NM_173519]	chr8:62413741-62413800	hs|8q12.3
2.31814	2.31814	1.21297	up	ANO5	anoctamin 5	Homo sapiens anoctamin 5 (ANO5), transcript variant 1, mRNA [NM_213599]	chr11:22304318-22304377	hs|11p14.3
2.31443	-2.31443	-1.21066	down	WNK3	WNK lysine deficient protein kinase 3	Homo sapiens WNK lysine deficient protein kinase 3 (WNK3), transcript variant 1, mRNA [NM_020922]	chrX:54223592-54223533	hs|Xp11.22
2.30991	2.30991	1.20784	up	HAO2	hydroxyacid oxidase 2 (long chain)	Homo sapiens hydroxyacid oxidase 2 (long chain) (HAO2), transcript variant 2, mRNA [NM_001005783]	chr1:119936419-119936478	hs|1p12
2.30971	2.30971	1.20771	up	HRK	harakiri, BCL2 interacting protein	harakiri, BCL2 interacting protein [Source:HGNC Symbol;Acc:HGNC:5185] [ENST00000257572]	chr12:117294035-117293976	hs|12q24.22
2.30723	2.30723	1.20616	up	SLC37A2	solute carrier family 37 (glucose-6-phosphate transporter), member 2	Homo sapiens solute carrier family 37 (glucose-6-phosphate transporter), member 2 (SLC37A2), transcript variant 1, mRNA [NM_198277]	chr11:124959065-124959124	hs|11q24.2
2.30707	2.30707	1.20606	up	LOC101927780	uncharacterized LOC101927780	Homo sapiens uncharacterized LOC101927780 (LOC101927780), transcript variant 2, long non-coding RNA [NR_110417]	chr14:62031907-62031848	hs|14q23.1
2.30574	2.30574	1.20523	up	DNAJC5B	DnaJ (Hsp40) homolog, subfamily C, member 5 beta	Homo sapiens DnaJ (Hsp40) homolog, subfamily C, member 5 beta (DNAJC5B), mRNA [NM_033105]	chr8:66988962-66989021	hs|8q13.1
2.30514	2.30514	1.20485	up	NTNG1	netrin G1	Homo sapiens netrin G1 (NTNG1), transcript variant 2, mRNA [NM_001113228]	chr1:107961207-107961266	hs|1p13.3
2.30483	2.30483	1.20466	up	SIRPB1	signal-regulatory protein beta 1	Homo sapiens signal-regulatory protein beta 1 (SIRPB1), transcript variant 1, mRNA [NM_006065]	chr20:1546848-1546134	hs|20p13
2.30319	-2.30319	-1.20363	down	PBX1	pre-B-cell leukemia homeobox 1	pre-B-cell leukemia homeobox 1 [Source:HGNC Symbol;Acc:HGNC:8632] [ENST00000474046]	chr1:164643866-164643925	hs|1q23.3
2.29802	-2.29802	-1.20039	down	LDB3	LIM domain binding 3	Homo sapiens LIM domain binding 3 (LDB3), transcript variant 6, mRNA [NM_001171611]	chr10:88452322-88459087	hs|10q23.2
2.29663	2.29663	1.19952	up	VWC2	von Willebrand factor C domain containing 2	Homo sapiens von Willebrand factor C domain containing 2 (VWC2), mRNA [NM_198570]	chr7:49951840-49951899	hs|7p12.2
2.2962	-2.2962	-1.19925	down	ADORA2A	adenosine A2a receptor	Homo sapiens adenosine A2a receptor (ADORA2A), transcript variant 3, mRNA [NM_000675]	chr22:24837485-24837544	hs|22q11.23
2.29579	2.29579	1.19899	up	CSGALNACT1	chondroitin sulfate N-acetylgalactosaminyltransferase 1	Homo sapiens chondroitin sulfate N-acetylgalactosaminyltransferase 1 (CSGALNACT1), transcript variant 2, mRNA [NM_018371]	chr8:19262014-19261955	hs|8p21.3
2.29477	2.29477	1.19835	up	DCBLD2	discoidin, CUB and LCCL domain containing 2	Homo sapiens discoidin, CUB and LCCL domain containing 2 (DCBLD2), mRNA [NM_080927]	chr3:98568429-98568370	hs|3q12.1
2.29431	2.29431	1.19806	up	COL15A1	collagen, type XV, alpha 1	Homo sapiens collagen, type XV, alpha 1 (COL15A1), mRNA [NM_001855]	chr9:101832765-101832824	hs|9q22.33
2.29377	-2.29377	-1.19772	down	RRP7B	ribosomal RNA processing 7 homolog B (S. cerevisiae)	ribosomal RNA processing 7 homolog B (S. cerevisiae) [Source:HGNC Symbol;Acc:HGNC:30454] [ENST00000357802]	chr22:42951874-42951815	hs|22q13.2
2.29286	-2.29286	-1.19715	down	EPB41L4A	erythrocyte membrane protein band 4.1 like 4A	Homo sapiens erythrocyte membrane protein band 4.1 like 4A (EPB41L4A), mRNA [NM_022140]	chr5:111498374-111498315	hs|5q22.1
2.29183	2.29183	1.1965	up	LYPD6B	LY6/PLAUR domain containing 6B	Homo sapiens LY6/PLAUR domain containing 6B (LYPD6B), mRNA [NM_177964]	chr2:150071079-150071138	hs|2q23.2
2.29141	2.29141	1.19623	up	WIPF3	WAS/WASL interacting protein family, member 3	Homo sapiens WAS/WASL interacting protein family, member 3 (WIPF3), mRNA [NM_001080529]	chr7:29955838-29955897	hs|7p14.3
2.2912	-2.2912	-1.1961	down	lnc-VCAM1-1	lnc-VCAM1-1:1	Q5LK20_DROME (Q5LK20) CG41056-PA.3, partial (5%) [THC2666602]	chr1:101171635-101171694	hs|1p21.2
2.29081	2.29081	1.19586	up	SCN4A	sodium channel, voltage gated, type IV alpha subunit	Homo sapiens sodium channel, voltage gated, type IV alpha subunit (SCN4A), mRNA [NM_000334]	chr17:62016580-62016521	hs|17q23.3
2.29061	-2.29061	-1.19573	down	CDKN1C	cyclin-dependent kinase inhibitor 1C (p57, Kip2)	Homo sapiens cyclin-dependent kinase inhibitor 1C (p57, Kip2) (CDKN1C), transcript variant 1, mRNA [NM_000076]	chr11:2904962-2904903	hs|11p15.4
2.28895	2.28895	1.19469	up	BTBD11	BTB (POZ) domain containing 11	Homo sapiens BTB (POZ) domain containing 11 (BTBD11), transcript variant a, mRNA [NM_001018072]	chr12:108052879-108052938	hs|12q23.3
2.28783	2.28783	1.19398	up	SNCA	synuclein, alpha (non A4 component of amyloid precursor)	Homo sapiens synuclein, alpha (non A4 component of amyloid precursor) (SNCA), transcript variant 4, mRNA [NM_007308]	chr4:90647744-90647685	hs|4q22.1
2.28585	-2.28585	-1.19273	down	MEIS1	Meis homeobox 1	Meis homeobox 1 [Source:HGNC Symbol;Acc:HGNC:7000] [ENST00000409622]	chr2:66667364-66667423	hs|2p14
2.28554	-2.28554	-1.19254	down	DMD	dystrophin	Homo sapiens dystrophin (DMD), transcript variant Dp40, mRNA [NM_004019]	chrX:31196342-31196312	hs|Xp21.2
2.2843	-2.2843	-1.19175	down	HCAR1	hydroxycarboxylic acid receptor 1	Homo sapiens cDNA FLJ16094 fis, clone SPLEN2004662, moderately similar to PROBABLE G PROTEIN-COUPLED RECEPTOR HM74. [AK122659]	chr12:123104883-123104824	hs|12q24.31
2.28367	2.28367	1.19136	up	CHRNA1	cholinergic receptor, nicotinic, alpha 1 (muscle)	Homo sapiens cholinergic receptor, nicotinic, alpha 1 (muscle) (CHRNA1), transcript variant 1, mRNA [NM_001039523]	chr2:175614896-175614837	hs|2q31.1
2.28363	2.28363	1.19133	up	OXGR1	oxoglutarate (alpha-ketoglutarate) receptor 1	Homo sapiens oxoglutarate (alpha-ketoglutarate) receptor 1 (OXGR1), mRNA [NM_080818]	chr13:97638201-97638142	hs|13q32.1
2.28361	2.28361	1.19131	up	LINC01571	long intergenic non-protein coding RNA 1571	Homo sapiens long intergenic non-protein coding RNA 1571 (LINC01571), long non-coding RNA [NR_110916]	chr16:51805556-51806318	hs|16q12.1
2.28286	-2.28286	-1.19084	down	PCDHB2	protocadherin beta 2	Homo sapiens protocadherin beta 2 (PCDHB2), mRNA [NM_018936]	chr5:140476755-140476814	hs|5q31.3
2.28065	-2.28065	-1.18944	down	FRY	furry homolog (Drosophila)	Homo sapiens furry homolog (Drosophila) (FRY), mRNA [NM_023037]	chr13:32870558-32870617	hs|13q13.1
2.28037	-2.28037	-1.18927	down	CABP7	calcium binding protein 7	Homo sapiens calcium binding protein 7 (CABP7), mRNA [NM_182527]	chr22:30127677-30127736	hs|22q12.2
2.2794	2.2794	1.18866	up	PF4	platelet factor 4	Homo sapiens platelet factor 4 (PF4), mRNA [NM_002619]	chr4:74846974-74846915	hs|4q13.3
2.27923	2.27923	1.18855	up	OR8H3	olfactory receptor, family 8, subfamily H, member 3	Homo sapiens olfactory receptor, family 8, subfamily H, member 3 (OR8H3), mRNA [NM_001005201]	chr11:55890668-55890727	hs|11q12.1
2.2765	-2.2765	-1.18682	down	ZNF774	zinc finger protein 774	Homo sapiens zinc finger protein 774 (ZNF774), mRNA [NM_001004309]	chr15:90904655-90904714	hs|15q26.1
2.276	-2.276	-1.1865	down	TOP3B	topoisomerase (DNA) III beta	Homo sapiens topoisomerase (DNA) III beta (TOP3B), transcript variant 1, mRNA [NM_003935]	chr22:22311463-22311404	hs|22q11.22
2.27569	-2.27569	-1.1863	down	SLC38A4	solute carrier family 38, member 4	Homo sapiens solute carrier family 38, member 4 (SLC38A4), transcript variant 1, mRNA [NM_018018]	chr12:47159136-47159077	hs|12q13.11
2.27525	-2.27525	-1.18603	down	lnc-C9orf170-1	lnc-C9orf170-1:7	Q7YS91_PIG (Q7YS91) Cell cycle progression 2 protein, partial (3%) [THC2708810]	chr9:89564043-89564102	hs|9q21.33
2.27325	-2.27325	-1.18475	down	ADAMTSL1	ADAMTS-like 1	Homo sapiens ADAMTS-like 1 (ADAMTSL1), transcript variant 4, mRNA [NM_001040272]	chr9:18910193-18910252	hs|9p22.1
2.27184	-2.27184	-1.18386	down	CYB5RL	cytochrome b5 reductase-like	Homo sapiens cytochrome b5 reductase-like (CYB5RL), mRNA [NM_001031672]	chr1:54638979-54638920	hs|1p32.3
2.27138	2.27138	1.18357	up	OR51A7	olfactory receptor, family 51, subfamily A, member 7	Homo sapiens olfactory receptor, family 51, subfamily A, member 7 (OR51A7), mRNA [NM_001004749]	chr11:4929448-4929507	hs|11p15.4
2.27126	-2.27126	-1.18349	down	TRAPPC10	trafficking protein particle complex 10	trafficking protein particle complex 10 [Source:HGNC Symbol;Acc:HGNC:11868] [ENST00000459741]	chr21:45509331-45509390	hs|21q22.3
2.27113	2.27113	1.18341	up	CABS1	calcium-binding protein, spermatid-specific 1	Homo sapiens calcium-binding protein, spermatid-specific 1 (CABS1), mRNA [NM_033122]	chr4:71201774-71201833	hs|4q13.3
2.27094	-2.27094	-1.18329	down	DISC1	disrupted in schizophrenia 1	Homo sapiens disrupted in schizophrenia 1 (DISC1), transcript variant b, mRNA [NM_001164538]	chr1:232144858-232144917	hs|1q42.2
2.27043	-2.27043	-1.18296	down	ATHL1	ATH1, acid trehalase-like 1 (yeast)	Homo sapiens ATH1, acid trehalase-like 1 (yeast) (ATHL1), mRNA [NM_025092]	chr11:293175-293234	hs|11p15.5
2.27026	2.27026	1.18285	up	ASZ1	ankyrin repeat, SAM and basic leucine zipper domain containing 1	Homo sapiens ankyrin repeat, SAM and basic leucine zipper domain containing 1 (ASZ1), transcript variant 1, mRNA [NM_130768]	chr7:117003701-117003642	hs|7q31.2
2.26906	-2.26906	-1.18209	down	KRT14	keratin 14, type I	Homo sapiens keratin 14, type I (KRT14), mRNA [NM_000526]	chr17:39742628-39742569	hs|17q21.2
2.26771	2.26771	1.18124	up	CYP2S1	cytochrome P450, family 2, subfamily S, polypeptide 1	cytochrome P450, family 2, subfamily S, polypeptide 1 [Source:HGNC Symbol;Acc:HGNC:15654] [ENST00000593545]	chr19:41712616-41712675	hs|19q13.2
2.26693	-2.26693	-1.18074	down	CMPK2	cytidine monophosphate (UMP-CMP) kinase 2, mitochondrial	Homo sapiens cytidine monophosphate (UMP-CMP) kinase 2, mitochondrial (CMPK2), transcript variant 2, mRNA [NM_001256477]	chr2:6990903-6990844	hs|2p25.2
2.26573	2.26573	1.17998	up	lnc-PCYOX1-2	lnc-PCYOX1-2:1	DA451014 CTONG2 Homo sapiens cDNA clone CTONG2023314 5', mRNA sequence [DA451014]	chr2:70649566-70649625	hs|2p13.3
2.26417	2.26417	1.17898	up	HK2	hexokinase 2	Homo sapiens hexokinase 2 (HK2), mRNA [NM_000189]	chr2:75118359-75118418	hs|2p12
2.26395	2.26395	1.17885	up	MUC6	mucin 6, oligomeric mucus/gel-forming	Homo sapiens mucin 6, oligomeric mucus/gel-forming (MUC6), mRNA [NM_005961]	chr11:1016885-1016826	hs|11p15.5
2.26386	-2.26386	-1.17878	down	C1R	complement component 1, r subcomponent	Homo sapiens complement component 1, r subcomponent (C1R), mRNA [NM_001733]	chr12:7187626-7187567	hs|12p13.31
2.2631	-2.2631	-1.1783	down	MAML3	mastermind-like 3 (Drosophila)	Homo sapiens mastermind-like 3 (Drosophila) (MAML3), mRNA [NM_018717]	chr4:140637604-140637545	hs|4q31.1
2.26254	-2.26254	-1.17794	down	CREBZF	CREB/ATF bZIP transcription factor	Homo sapiens CREB/ATF bZIP transcription factor (CREBZF), transcript variant 1, mRNA [NM_001039618]	chr11:85368695-85368636	hs|11q14.1
2.26229	-2.26229	-1.17779	down	GRAMD1C	GRAM domain containing 1C	Homo sapiens GRAM domain containing 1C (GRAMD1C), transcript variant 1, mRNA [NM_017577]	chr3:113665696-113665755	hs|3q13.31
2.25879	-2.25879	-1.17555	down	FLJ46875	uncharacterized LOC440918	Homo sapiens cDNA FLJ46875 fis, clone UTERU3014446. [AK128708]	chr2:157193343-157193284	hs|2q24.1
2.2583	2.2583	1.17523	up	KLRK1	killer cell lectin-like receptor subfamily K, member 1	Homo sapiens killer cell lectin-like receptor subfamily K, member 1 (KLRK1), mRNA [NM_007360]	chr12:10531291-10531232	hs|12p13.2
2.25774	2.25774	1.17488	up	BMPER	BMP binding endothelial regulator	Homo sapiens BMP binding endothelial regulator (BMPER), mRNA [NM_133468]	chr7:34193999-34194058	hs|7p14.3
2.2568	-2.2568	-1.17428	down	STARD9	StAR-related lipid transfer (START) domain containing 9	Homo sapiens StAR-related lipid transfer (START) domain containing 9 (STARD9), mRNA [NM_020759]	chr15:42955037-42955485	hs|15q15.2
2.25674	2.25674	1.17424	up	LOC101929282	uncharacterized LOC101929282	Homo sapiens uncharacterized LOC101929282 (LOC101929282), transcript variant 2, long non-coding RNA [NR_110245]	chr2:151491248-151491307	hs|2q23.3
2.25511	2.25511	1.1732	up	FCRL4	Fc receptor-like 4	Homo sapiens Fc receptor-like 4 (FCRL4), mRNA [NM_031282]	chr1:157544694-157544635	hs|1q23.1
2.25469	2.25469	1.17293	up	LINC00824	long intergenic non-protein coding RNA 824	Homo sapiens long intergenic non-protein coding RNA 824 (LINC00824), transcript variant 1, long non-coding RNA [NR_121672]	chr8:129417954-129417895	hs|8q24.21
2.25356	2.25356	1.1722	up	AREG	amphiregulin	Homo sapiens amphiregulin (AREG), mRNA [NM_001657]	chr4:75318293-75318352	hs|4q13.3
2.25069	2.25069	1.17036	up	MUC4	mucin 4, cell surface associated	Homo sapiens mucin 4, cell surface associated (MUC4), transcript variant 1, mRNA [NM_018406]	chr3:195514839-195514780	hs|3q29
2.24882	2.24882	1.16917	up	ME1	malic enzyme 1, NADP(+)-dependent, cytosolic	Homo sapiens malic enzyme 1, NADP(+)-dependent, cytosolic (ME1), mRNA [NM_002395]	chr6:83920855-83920796	hs|6q14.2
2.24625	-2.24625	-1.16752	down	RIPK3	receptor-interacting serine-threonine kinase 3	Homo sapiens receptor-interacting serine-threonine kinase 3 (RIPK3), mRNA [NM_006871]	chr14:24808442-24808383	hs|14q12
2.23965	-2.23965	-1.16327	down	LEPR	leptin receptor	Homo sapiens leptin receptor (LEPR), transcript variant 1, mRNA [NM_002303]	chr1:66102129-66102188	hs|1p31.3
2.23927	2.23927	1.16303	up	GPRC6A	G protein-coupled receptor, class C, group 6, member A	Homo sapiens G protein-coupled receptor, class C, group 6, member A (GPRC6A), transcript variant 1, mRNA [NM_148963]	chr6:117113715-117113656	hs|6q22.1
2.23823	-2.23823	-1.16236	down	YTHDC1	YTH domain containing 1	Homo sapiens YTH domain containing 1 (YTHDC1), transcript variant 1, mRNA [NM_001031732]	chr4:69176348-69176289	hs|4q13.2
2.23793	2.23793	1.16217	up	GRM7-AS3	GRM7 antisense RNA 3	Homo sapiens GRM7 antisense RNA 3 (GRM7-AS3), transcript variant 2, long non-coding RNA [NR_110125]	chr3:6773039-6772980	hs|3p26.1
2.23781	2.23781	1.16209	up	HLA-DMB	major histocompatibility complex, class II, DM beta	Homo sapiens major histocompatibility complex, class II, DM beta (HLA-DMB), mRNA [NM_002118]	chr6:32902563-32902504	hs|6p21.32
2.23578	-2.23578	-1.16078	down	ALX3	ALX homeobox 3	Homo sapiens ALX homeobox 3 (ALX3), mRNA [NM_006492]	chr1:110603170-110603111	hs|1p13.3
2.23578	-2.23578	-1.16078	down	lnc-INADL-2	lnc-INADL-2:1	Homo sapiens mRNA, chromosome 1 specific transcript KIAA0485. [AB007954]	chr1:61596906-61596965	hs|1p31.3
2.23417	2.23417	1.15974	up	RGCC	regulator of cell cycle	Homo sapiens regulator of cell cycle (RGCC), mRNA [NM_014059]	chr13:42042937-42044635	hs|13q14.11
2.23388	-2.23388	-1.15955	down	CD1B	CD1b molecule	Homo sapiens CD1b molecule (CD1B), mRNA [NM_001764]	chr1:158297780-158297740	hs|1q23.1
2.2333	-2.2333	-1.15918	down	PLCL1	phospholipase C-like 1	Homo sapiens phospholipase C-like 1 (PLCL1), mRNA [NM_006226]	chr2:199012843-199012902	hs|2q33.1
2.23065	2.23065	1.15746	up	ERVV-2	endogenous retrovirus group V, member 2	Homo sapiens endogenous retrovirus group V, member 2 (ERVV-2), mRNA [NM_001191055]	chr19:53552398-53552457	hs|19q13.41
2.23043	-2.23043	-1.15732	down	LRRN4CL	LRRN4 C-terminal like	Homo sapiens LRRN4 C-terminal like (LRRN4CL), mRNA [NM_203422]	chr11:62453945-62453886	hs|11q12.3
2.22956	-2.22956	-1.15676	down	COL14A1	collagen, type XIV, alpha 1	Homo sapiens collagen, type XIV, alpha 1 (COL14A1), mRNA [NM_021110]	chr8:121381649-121381708	hs|8q24.12
2.22655	2.22655	1.15481	up	lnc-RPRM-4	lnc-RPRM-4:1	LNCipedia lincRNA (lnc-RPRM-4), lincRNA [lnc-RPRM-4:1]	chr2:155345356-155345297	hs|2q24.1
2.22626	-2.22626	-1.15462	down	KRT17	keratin 17, type I	Homo sapiens keratin 17, type I (KRT17), mRNA [NM_000422]	chr17:39777035-39776976	hs|17q21.2
2.22513	2.22513	1.15389	up	BTC	betacellulin	Homo sapiens betacellulin (BTC), mRNA [NM_001729]	chr4:75675897-75675838	hs|4q13.3
2.22152	2.22152	1.15154	up	MYH15	myosin, heavy chain 15	Homo sapiens myosin, heavy chain 15 (MYH15), mRNA [NM_014981]	chr3:108099821-108099762	hs|3q13.13
2.22101	-2.22101	-1.15122	down	ASPRV1	aspartic peptidase, retroviral-like 1	Homo sapiens aspartic peptidase, retroviral-like 1 (ASPRV1), mRNA [NM_152792]	chr2:70187305-70187246	hs|2p13.3
2.21985	-2.21985	-1.15046	down	lnc-ANGPT2-2	lnc-ANGPT2-2:4	Homo sapiens cDNA clone IMAGE:4821564. [BC024246]	chr8:6262891-6262832	hs|8p23.1
2.21829	2.21829	1.14945	up	OR10AG1	olfactory receptor, family 10, subfamily AG, member 1	Homo sapiens olfactory receptor, family 10, subfamily AG, member 1 (OR10AG1), mRNA [NM_001005491]	chr11:55735094-55735035	hs|11q12.1
2.21788	-2.21788	-1.14918	down	SERTAD4	SERTA domain containing 4	Homo sapiens SERTA domain containing 4 (SERTAD4), mRNA [NM_019605]	chr1:210416034-210416093	hs|1q32.2
2.2135	2.2135	1.14633	up	RNF17	ring finger protein 17	Homo sapiens ring finger protein 17 (RNF17), transcript variant 1, mRNA [NM_031277]	chr13:25363862-25367190	hs|13q12.12
2.21211	-2.21211	-1.14543	down	PLB1	phospholipase B1	Homo sapiens phospholipase B1 (PLB1), transcript variant 1, mRNA [NM_153021]	chr2:28812883-28812942	hs|2p23.2
2.21181	2.21181	1.14523	up	CYP2C18	cytochrome P450, family 2, subfamily C, polypeptide 18	Homo sapiens cytochrome P450, family 2, subfamily C, polypeptide 18 (CYP2C18), transcript variant 1, mRNA [NM_000772]	chr10:96495397-96495456	hs|10q23.33
2.21012	-2.21012	-1.14412	down	lnc-RDH10-3	lnc-RDH10-3:1	Homo sapiens cDNA FLJ43798 fis, clone TESTI4000250. [AK125786]	chr8:74365363-74365422	hs|8q21.11
2.20837	-2.20837	-1.14298	down	UBE4B	ubiquitination factor E4B	ubiquitination factor E4B [Source:HGNC Symbol;Acc:HGNC:12500] [ENST00000377153]	chr1:10132588-10132647	hs|1p36.22
2.20821	2.20821	1.14288	up	lnc-CARD18-1	lnc-CARD18-1:1	DB094723 TESTI4 Homo sapiens cDNA clone TESTI4045168 5', mRNA sequence [DB094723]	chr11:105386476-105386417	hs|11q22.3
2.20684	-2.20684	-1.14198	down	RGMA	repulsive guidance molecule family member a	Homo sapiens repulsive guidance molecule family member a (RGMA), transcript variant 4, mRNA [NM_020211]	chr15:93586835-93586776	hs|15q26.1
2.20505	2.20505	1.14081	up	FAM216B	family with sequence similarity 216, member B	Homo sapiens family with sequence similarity 216, member B (FAM216B), mRNA [NM_182508]	chr13:43364822-43364881	hs|13q14.11
2.20443	-2.20443	-1.1404	down	TMEM204	transmembrane protein 204	Homo sapiens transmembrane protein 204 (TMEM204), transcript variant 1, mRNA [NM_024600]	chr16:1605184-1605243	hs|16p13.3
2.20438	2.20438	1.14037	up	lnc-APIP-1	lnc-APIP-1:1	AGENCOURT_14534621 NIH_MGC_191 Homo sapiens cDNA clone IMAGE:30418481 5', mRNA sequence [CD641957]	chr11:35086732-35086673	hs|11p13
2.20433	2.20433	1.14034	up	CTSC	cathepsin C	Homo sapiens cathepsin C (CTSC), transcript variant 2, mRNA [NM_148170]	chr11:88054087-88054028	hs|11q14.2
2.20424	2.20424	1.14028	up	CCDC162P	coiled-coil domain containing 162, pseudogene	coiled-coil domain containing 162, pseudogene [Source:HGNC Symbol;Acc:HGNC:21565] [ENST00000368966]	chr6:109635359-109635418	hs|6q21
2.20348	-2.20348	-1.13978	down	ADAM33	ADAM metallopeptidase domain 33	Homo sapiens ADAM metallopeptidase domain 33 (ADAM33), transcript variant 1, mRNA [NM_025220]	chr20:3649151-3649092	hs|20p13
2.2032	-2.2032	-1.1396	down	CLEC2D	C-type lectin domain family 2, member D	Homo sapiens C-type lectin domain family 2, member D (CLEC2D), transcript variant 2, mRNA [NM_001004419]	chr12:9851894-9851953	hs|12p13.31
2.2	-2.2	-1.13751	down	CARD8	caspase recruitment domain family, member 8	Homo sapiens caspase recruitment domain family, member 8 (CARD8), transcript variant 6, mRNA [NM_001184904]	chr19:48741599-48741540	hs|19q13.33
2.19804	2.19804	1.13622	up	MUC4	mucin 4, cell surface associated	Homo sapiens mucin 4, cell surface associated (MUC4), transcript variant 1, mRNA [NM_018406]	chr3:195514819-195514760	hs|3q29
2.19704	-2.19704	-1.13556	down	Sept4	septin 4	Homo sapiens septin 4 (SEPT4), transcript variant 1, mRNA [NM_004574]	chr17:56599121-56598973	hs|17q22
2.19552	-2.19552	-1.13456	down	LRRK2	leucine-rich repeat kinase 2	Homo sapiens cDNA FLJ45829 fis, clone NT2RP8006452. [AK127729]	chr12:40698712-40698771	hs|12q12
2.19501	2.19501	1.13422	up	PECAM1	platelet/endothelial cell adhesion molecule 1	Homo sapiens platelet/endothelial cell adhesion molecule 1 (PECAM1), mRNA [NM_000442]	chr17:62400603-62400544	hs|17q23.3
2.19377	-2.19377	-1.13341	down	DLG2	discs, large homolog 2 (Drosophila)	Homo sapiens cDNA FLJ45207 fis, clone BRCAN2010665, highly similar to Channel associated protein of synapse-110. [AK127150]	chr11:83497571-83497512	hs|11q14.1
2.19377	-2.19377	-1.13341	down	AMER1	APC membrane recruitment protein 1	Homo sapiens APC membrane recruitment protein 1 (AMER1), mRNA [NM_152424]	chrX:63410870-63410811	hs|Xq11.2
2.19336	-2.19336	-1.13314	down	MFGE8	milk fat globule-EGF factor 8 protein	Homo sapiens milk fat globule-EGF factor 8 protein (MFGE8), transcript variant 1, mRNA [NM_005928]	chr15:89442763-89442704	hs|15q26.1
2.19201	-2.19201	-1.13226	down	CD81-AS1	CD81 antisense RNA 1	Homo sapiens CD81 antisense RNA 1 (CD81-AS1), long non-coding RNA [NR_108080]	chr11:2350231-2350172	hs|11p15.5
2.19148	2.19148	1.13191	up	MIR4500HG	MIR4500 host gene (non-protein coding)	MIR4500 host gene (non-protein coding) [Source:HGNC Symbol;Acc:HGNC:42773] [ENST00000453832]	chr13:88267903-88267844	hs|13q31.2
2.18913	-2.18913	-1.13036	down	ADAMTSL1	ADAMTS-like 1	Homo sapiens ADAMTS-like 1 (ADAMTSL1), transcript variant 2, mRNA [NM_052866]	chr9:18622254-18622313	hs|9p22.1
2.18834	-2.18834	-1.12984	down	RAET1E	retinoic acid early transcript 1E	Homo sapiens retinoic acid early transcript 1E (RAET1E), transcript variant 1, mRNA [NM_139165]	chr6:150209801-150209742	hs|6q25.1
2.18714	-2.18714	-1.12905	down	ADARB1	adenosine deaminase, RNA-specific, B1	Homo sapiens adenosine deaminase, RNA-specific, B1 (ADARB1), transcript variant 1, mRNA [NM_001112]	chr21:46646134-46646193	hs|21q22.3
2.18448	-2.18448	-1.12729	down	SUSD2	sushi domain containing 2	Homo sapiens sushi domain containing 2 (SUSD2), mRNA [NM_019601]	chr22:24584978-24585037	hs|22q11.23
2.18415	-2.18415	-1.12708	down	BCL2L11	BCL2-like 11 (apoptosis facilitator)	Homo sapiens BCL2-like 11 (apoptosis facilitator) (BCL2L11), transcript variant 1, mRNA [NM_138621]	chr2:111925892-111925951	hs|2q13
2.1837	2.1837	1.12677	up	lnc-IFNG-4	lnc-IFNG-4:2	RST9677 Athersys RAGE Library Homo sapiens cDNA, mRNA sequence [BG190604]	chr12:67964876-67964817	hs|12q15
2.18192	2.18192	1.1256	up	lnc-IGSF3-1	lnc-IGSF3-1:1	CD014608 Human CD34+ ESTs from primary hematopoietic stem-progenitor cells Homo sapiens cDNA 3', mRNA sequence [GD150158]	chr1:117338687-117338628	hs|1p13.1
2.18073	-2.18073	-1.12481	down	CYS1	cystin 1	Homo sapiens cystin 1 (CYS1), mRNA [NM_001037160]	chr2:10197031-10196972	hs|2p25.1
2.17924	-2.17924	-1.12383	down	ADAMTSL1	ADAMTS-like 1	Homo sapiens ADAMTS-like 1 (ADAMTSL1), transcript variant 4, mRNA [NM_001040272]	chr9:18908487-18908546	hs|9p22.1
2.1791	2.1791	1.12373	up	LRIT2	leucine-rich repeat, immunoglobulin-like and transmembrane domains 2	Homo sapiens leucine-rich repeat, immunoglobulin-like and transmembrane domains 2 (LRIT2), transcript variant 1, mRNA [NM_001284223]	chr10:85980324-85980265	hs|10q23.1
2.17603	-2.17603	-1.1217	down	SDC2	syndecan 2	Homo sapiens syndecan 2 (SDC2), mRNA [NM_002998]	chr8:97623978-97624037	hs|8q22.1
2.17467	-2.17467	-1.1208	down	PTGIS	prostaglandin I2 (prostacyclin) synthase	Homo sapiens prostaglandin I2 (prostacyclin) synthase (PTGIS), mRNA [NM_000961]	chr20:48120507-48120448	hs|20q13.13
2.17259	-2.17259	-1.11942	down	KCNIP2	Kv channel interacting protein 2	Homo sapiens Kv channel interacting protein 2 (KCNIP2), transcript variant 7, mRNA [NM_173197]	chr10:103588446-103588387	hs|10q24.32
2.17255	-2.17255	-1.11939	down	CNTNAP2	contactin associated protein-like 2	Homo sapiens contactin associated protein-like 2 (CNTNAP2), mRNA [NM_014141]	chr7:148117937-148117996	hs|7q36.1
2.17219	2.17219	1.11915	up	LOC101927120	uncharacterized LOC101927120	Homo sapiens uncharacterized LOC101927120 (LOC101927120), transcript variant 1, long non-coding RNA [NR_110136]	chr11:56644772-56644831	hs|11q12.1
2.1717	2.1717	1.11883	up	ST3GAL4	ST3 beta-galactoside alpha-2,3-sialyltransferase 4	Homo sapiens cDNA FLJ11867 fis, clone HEMBA1006976, weakly similar to H.sapiens mRNA for Gal-beta(1-3/1-4)GlcNAc alpha-2.3-sialyltransferase. [AK021929]	chr11:126310189-126310248	hs|11q24.2
2.17084	2.17084	1.11825	up	STYK1	serine/threonine/tyrosine kinase 1	Homo sapiens serine/threonine/tyrosine kinase 1 (STYK1), mRNA [NM_018423]	chr12:10771913-10771854	hs|12p13.2
2.16955	2.16955	1.1174	up	POPDC3	popeye domain containing 3	Homo sapiens popeye domain containing 3 (POPDC3), transcript variant 1, mRNA [NM_022361]	chr6:105606468-105606409	hs|6q21
2.16938	2.16938	1.11728	up	CAMK2A	calcium/calmodulin-dependent protein kinase II alpha	Homo sapiens calcium/calmodulin-dependent protein kinase II alpha (CAMK2A), transcript variant 1, mRNA [NM_015981]	chr5:149610928-149610869	hs|5q32
2.16771	-2.16771	-1.11617	down	KDM4C	lysine (K)-specific demethylase 4C	Homo sapiens lysine (K)-specific demethylase 4C (KDM4C), transcript variant 3, mRNA [NM_001146695]	chr9:7077209-7077268	hs|9p24.1
2.16586	2.16586	1.11494	up	DCBLD2	discoidin, CUB and LCCL domain containing 2	Homo sapiens discoidin, CUB and LCCL domain containing 2 (DCBLD2), mRNA [NM_080927]	chr3:98515261-98515202	hs|3q12.1
2.16371	2.16371	1.11351	up	SLC35D3	solute carrier family 35, member D3	Homo sapiens solute carrier family 35, member D3 (SLC35D3), mRNA [NM_001008783]	chr6:137246671-137246730	hs|6q23.3
2.16368	-2.16368	-1.11349	down	LOC101928043	uncharacterized LOC101928043	Homo sapiens uncharacterized LOC101928043 (LOC101928043), long non-coding RNA [NR_110692]	chr1:22350873-22350814	hs|1p36.12
2.16278	2.16278	1.11289	up	C8orf74	chromosome 8 open reading frame 74	Homo sapiens chromosome 8 open reading frame 74 (C8orf74), mRNA [NM_001040032]	chr8:10558043-10558102	hs|8p23.1
2.16107	2.16107	1.11175	up	STC2	stanniocalcin 2	Homo sapiens stanniocalcin 2 (STC2), mRNA [NM_003714]	chr5:172742046-172741987	hs|5q35.1
2.1608	-2.1608	-1.11156	down	CNST	consortin, connexin sorting protein	Homo sapiens consortin, connexin sorting protein (CNST), transcript variant 2, mRNA [NM_001139459]	chr1:246811411-246811470	hs|1q44
2.16062	-2.16062	-1.11145	down	CKB	creatine kinase, brain	Homo sapiens creatine kinase, brain (CKB), mRNA [NM_001823]	chr14:103986525-103986466	hs|14q32.32
2.16031	-2.16031	-1.11124	down	SLCO1C1	solute carrier organic anion transporter family, member 1C1	Homo sapiens solute carrier organic anion transporter family, member 1C1 (SLCO1C1), transcript variant 2, mRNA [NM_017435]	chr12:20905804-20905863	hs|12p12.2
2.15971	-2.15971	-1.11084	down	MIATNB	MIAT neighbor (non-protein coding)	Homo sapiens MIAT neighbor (non-protein coding) (MIATNB), long non-coding RNA [NR_110543]	chr22:27176237-27176296	hs|22q12.1
2.15964	-2.15964	-1.11079	down	TAF4B	TAF4b RNA polymerase II, TATA box binding protein (TBP)-associated factor, 105kDa	Homo sapiens TAF4b RNA polymerase II, TATA box binding protein (TBP)-associated factor, 105kDa (TAF4B), transcript variant 1, mRNA [NM_001293725]	chr18:23971373-23971432	hs|18q11.2
2.15756	-2.15756	-1.1094	down	GNRHR	gonadotropin-releasing hormone receptor	Homo sapiens gonadotropin-releasing hormone receptor (GNRHR), transcript variant 1, mRNA [NM_000406]	chr4:68603172-68603113	hs|4q13.2
2.15684	2.15684	1.10892	up	OR6N1	olfactory receptor, family 6, subfamily N, member 1	Homo sapiens olfactory receptor, family 6, subfamily N, member 1 (OR6N1), mRNA [NM_001005185]	chr1:158736408-158736349	hs|1q23.1
2.15532	-2.15532	-1.1079	down	ERG	v-ets avian erythroblastosis virus E26 oncogene homolog	Homo sapiens v-ets avian erythroblastosis virus E26 oncogene homolog (ERG), transcript variant 2, mRNA [NM_004449]	chr21:39774545-39774486	hs|21q22.2
2.15383	-2.15383	-1.10691	down	NFIA	nuclear factor I/A	Homo sapiens nuclear factor I/A (NFIA), transcript variant 2, mRNA [NM_005595]	chr1:61921914-61921973	hs|1p31.3
2.15103	2.15103	1.10503	up	lnc-FAM209B-1	lnc-FAM209B-1:1	LNCipedia lincRNA (lnc-FAM209B-1), lincRNA [lnc-FAM209B-1:1]	chr20:55130161-55130220	hs|20q13.31
2.15082	-2.15082	-1.10488	down	FLJ45950	FLJ45950 protein	Homo sapiens cDNA FLJ45950 fis, clone PLACE7008136. [AK127847]	chr11:129104412-129104353	hs|11q24.3
2.15052	-2.15052	-1.10469	down	PLEKHG4B	pleckstrin homology domain containing, family G (with RhoGef domain) member 4B	Homo sapiens pleckstrin homology domain containing, family G (with RhoGef domain) member 4B (PLEKHG4B), mRNA [NM_052909]	chr5:185440-185499	hs|5p15.33
2.14879	-2.14879	-1.10352	down	ANXA9	annexin A9	Homo sapiens annexin A9 (ANXA9), mRNA [NM_003568]	chr1:150967943-150968002	hs|1q21.3
2.14869	2.14869	1.10346	up	LINC00683	long intergenic non-protein coding RNA 683	Homo sapiens long intergenic non-protein coding RNA 683 (LINC00683), long non-coding RNA [NR_120419]	chr18:74335237-74335296	hs|18q23
2.14748	-2.14748	-1.10265	down	SLAIN2	SLAIN motif family, member 2	Homo sapiens SLAIN motif family, member 2 (SLAIN2), mRNA [NM_020846]	chr4:48427423-48427482	hs|4p11
2.14637	2.14637	1.1019	up	TAS1R2	taste receptor, type 1, member 2	Homo sapiens taste receptor, type 1, member 2 (TAS1R2), mRNA [NM_152232]	chr1:19175855-19168308	hs|1p36.13
2.14594	2.14594	1.10161	up	OR52E2	olfactory receptor, family 52, subfamily E, member 2	Homo sapiens olfactory receptor, family 52, subfamily E, member 2 (OR52E2), mRNA [NM_001005164]	chr11:5079939-5079880	hs|11p15.4
2.14532	2.14532	1.1012	up	OR6S1	olfactory receptor, family 6, subfamily S, member 1	Homo sapiens olfactory receptor, family 6, subfamily S, member 1 (OR6S1), mRNA [NM_001001968]	chr14:21108914-21108855	hs|14q11.2
2.14469	-2.14469	-1.10077	down	SYNPO2	synaptopodin 2	Homo sapiens synaptopodin 2 (SYNPO2), transcript variant 1, mRNA [NM_133477]	chr4:119982075-119982134	hs|4q26
2.14363	2.14363	1.10006	up	KRTAP3-2	keratin associated protein 3-2	Homo sapiens keratin associated protein 3-2 (KRTAP3-2), mRNA [NM_031959]	chr17:39155762-39155703	hs|17q21.2
2.14324	2.14324	1.0998	up	RSPH1	radial spoke head 1 homolog (Chlamydomonas)	Homo sapiens radial spoke head 1 homolog (Chlamydomonas) (RSPH1), transcript variant 1, mRNA [NM_080860]	chr21:43892680-43892621	hs|21q22.3
2.14144	-2.14144	-1.09858	down	CPZ	carboxypeptidase Z	Homo sapiens carboxypeptidase Z (CPZ), transcript variant 3, mRNA [NM_001014448]	chr4:8616184-8620173	hs|4p16.1
2.14007	-2.14007	-1.09766	down	PLEKHB1	pleckstrin homology domain containing, family B (evectins) member 1	Homo sapiens pleckstrin homology domain containing, family B (evectins) member 1 (PLEKHB1), transcript variant 1, mRNA [NM_021200]	chr11:73373788-73373847	hs|11q13.4
2.13967	2.13967	1.09739	up	IL6	interleukin 6	Homo sapiens interleukin 6 (IL6), mRNA [NM_000600]	chr7:22771207-22771266	hs|7p15.3
2.13688	-2.13688	-1.09551	down	PCDHB15	protocadherin beta 15	Homo sapiens protocadherin beta 15 (PCDHB15), mRNA [NM_018935]	chr5:140627430-140627489	hs|5q31.3
2.13642	2.13642	1.09519	up	INS-IGF2	INS-IGF2 readthrough	Homo sapiens INS-IGF2 readthrough (INS-IGF2), transcript variant 2, mRNA [NM_001042376]	chr11:2167915-2167856	hs|11p15.5
2.13622	2.13622	1.09506	up	GPR63	G protein-coupled receptor 63	Homo sapiens G protein-coupled receptor 63 (GPR63), transcript variant 2, mRNA [NM_030784]	chr6:97246699-97246640	hs|6q16.1
2.13614	-2.13614	-1.09501	down	lnc-CCHCR1-1	lnc-CCHCR1-1:1	Q6H1K9_HUMAN (Q6H1K9) Psoriasis susceptibility 1 candidate 3, complete [THC2664701]	chr6:31145185-31145126	hs|6p21.33
2.13603	-2.13603	-1.09493	down	CALCRL	calcitonin receptor-like	Homo sapiens calcitonin receptor-like (CALCRL), transcript variant 1, mRNA [NM_005795]	chr2:188248030-188247971	hs|2q32.1
2.13599	-2.13599	-1.09491	down	FAAHP1	fatty acid amide hydrolase pseudogene 1	fatty acid amide hydrolase pseudogene 1 [Source:HGNC Symbol;Acc:HGNC:50679] [ENST00000606395]	chr1:46902066-46902125	hs|1p33
2.13578	-2.13578	-1.09476	down	LOC101927619	uncharacterized LOC101927619	Homo sapiens uncharacterized LOC101927619 (LOC101927619), long non-coding RNA [NR_110267]	chr2:199239264-199239205	hs|2q33.1
2.13479	-2.13479	-1.09409	down	AKAP5	A kinase (PRKA) anchor protein 5	Homo sapiens A kinase (PRKA) anchor protein 5 (AKAP5), mRNA [NM_004857]	chr14:64935925-64935981	hs|14q23.3
2.13411	2.13411	1.09364	up	FEV	FEV (ETS oncogene family)	Homo sapiens FEV (ETS oncogene family) (FEV), mRNA [NM_017521]	chr2:219846261-219846202	hs|2q35
2.13358	2.13358	1.09328	up	KLHL6	kelch-like family member 6	Homo sapiens kelch-like family member 6 (KLHL6), mRNA [NM_130446]	chr3:183208877-183208818	hs|3q27.1
2.13336	2.13336	1.09313	up	DNAH6	dynein, axonemal, heavy chain 6	Homo sapiens dynein, axonemal, heavy chain 6 (DNAH6), mRNA [NM_001370]	chr2:84752742-84752801	hs|2p11.2
2.13237	-2.13237	-1.09246	down	NDNF	neuron-derived neurotrophic factor	Homo sapiens neuron-derived neurotrophic factor (NDNF), mRNA [NM_024574]	chr4:121957475-121957416	hs|4q27
2.13161	-2.13161	-1.09194	down	SMG6-IT1	SMG6 intronic transcript 1 (non-protein coding)	Homo sapiens partial mRNA, clone cha12. [AJ272176]	chr17:2139066-2139007	hs|17p13.3
2.13131	-2.13131	-1.09174	down	KCNK2	potassium channel, two pore domain subfamily K, member 2	Homo sapiens potassium channel, two pore domain subfamily K, member 2 (KCNK2), transcript variant 1, mRNA [NM_001017424]	chr1:215410352-215410411	hs|1q41
2.13121	2.13121	1.09167	up	EHF	ets homologous factor	Homo sapiens ets homologous factor (EHF), transcript variant 2, mRNA [NM_012153]	chr11:34681911-34681970	hs|11p13
2.13066	2.13066	1.0913	up	FTHL17	ferritin, heavy polypeptide-like 17	Homo sapiens ferritin, heavy polypeptide-like 17 (FTHL17), mRNA [NM_031894]	chrX:31089993-31089934	hs|Xp21.2
2.13016	2.13016	1.09096	up	LINC01087	long intergenic non-protein coding RNA 1087	Homo sapiens long intergenic non-protein coding RNA 1087 (LINC01087), long non-coding RNA [NR_108087]	chr2:132396619-132396678	hs|2q21.1
2.12971	-2.12971	-1.09066	down	MFAP2	microfibrillar-associated protein 2	Homo sapiens microfibrillar-associated protein 2 (MFAP2), transcript variant 1, mRNA [NM_017459]	chr1:17302197-17302138	hs|1p36.13
2.12913	-2.12913	-1.09026	down	SCN9A	sodium channel, voltage gated, type IX alpha subunit	Homo sapiens sodium channel, voltage gated, type IX alpha subunit (SCN9A), mRNA [NM_002977]	chr2:167052099-167052040	hs|2q24.3
2.12893	-2.12893	-1.09013	down	CDH11	cadherin 11, type 2, OB-cadherin (osteoblast)	cadherin 11, type 2, OB-cadherin (osteoblast) [Source:HGNC Symbol;Acc:HGNC:1750] [ENST00000394156]	chr16:64982572-64982513	hs|16q21
2.12762	-2.12762	-1.08924	down	STAG2	stromal antigen 2	stromal antigen 2 [Source:HGNC Symbol;Acc:HGNC:11355] [ENST00000394478]	chrX:123097146-123097205	hs|Xq25
2.12707	2.12707	1.08887	up	IFI6	interferon, alpha-inducible protein 6	Homo sapiens interferon, alpha-inducible protein 6 (IFI6), transcript variant 3, mRNA [NM_022873]	chr1:27992896-27992837	hs|1p36.11
2.12678	-2.12678	-1.08867	down	FAXDC2	fatty acid hydroxylase domain containing 2	Homo sapiens fatty acid hydroxylase domain containing 2 (FAXDC2), mRNA [NM_032385]	chr5:154198184-154198125	hs|5q33.2
2.12649	-2.12649	-1.08847	down	SLC45A1	solute carrier family 45, member 1	Homo sapiens solute carrier family 45, member 1 (SLC45A1), mRNA [NM_001080397]	chr1:8390869-8390928	hs|1p36.23
2.12582	-2.12582	-1.08802	down	FRAS1	Fraser extracellular matrix complex subunit 1	Homo sapiens cDNA FLJ34763 fis, clone NT2NE2002186. [AK092082]	chr4:79432605-79432664	hs|4q21.21
2.12489	2.12489	1.08739	up	LINC01287	long intergenic non-protein coding RNA 1287	long intergenic non-protein coding RNA 1287 [Source:HGNC Symbol;Acc:HGNC:50351] [ENST00000416982]	chr7:153108745-153108686	hs|7q36.2
2.12488	2.12488	1.08738	up	C7orf69	chromosome 7 open reading frame 69	Homo sapiens chromosome 7 open reading frame 69 (C7orf69), transcript variant 1, mRNA [NM_025031]	chr7:47859325-47859384	hs|7p12.3
2.12339	2.12339	1.08637	up	SERPINA9	serpin peptidase inhibitor, clade A (alpha-1 antiproteinase, antitrypsin), member 9	Homo sapiens serpin peptidase inhibitor, clade A (alpha-1 antiproteinase, antitrypsin), member 9 (SERPINA9), transcript variant 1, mRNA [NM_175739]	chr14:94933457-94931144	hs|14q32.13
2.12061	-2.12061	-1.08448	down	STON1-GTF2A1L	STON1-GTF2A1L readthrough	Homo sapiens STON1-GTF2A1L readthrough (STON1-GTF2A1L), transcript variant 2, mRNA [NM_001198593]	chr2:49003562-49003621	hs|2p16.3
2.12005	2.12005	1.0841	up	LIF	leukemia inhibitory factor	Homo sapiens leukemia inhibitory factor (LIF), transcript variant 1, mRNA [NM_002309]	chr22:30636772-30636713	hs|22q12.2
2.11906	-2.11906	-1.08342	down	AHNAK2	AHNAK nucleoprotein 2	Homo sapiens AHNAK nucleoprotein 2 (AHNAK2), mRNA [NM_138420]	chr14:105411626-105411567	hs|14q32.33
2.11804	-2.11804	-1.08273	down	UBE2QL1	ubiquitin-conjugating enzyme E2Q family-like 1	Homo sapiens ubiquitin-conjugating enzyme E2Q family-like 1 (UBE2QL1), mRNA [NM_001145161]	chr5:6491652-6491711	hs|5p15.31
2.11803	-2.11803	-1.08272	down	LIPK	lipase, family member K	Homo sapiens lipase, family member K (LIPK), mRNA [NM_001080518]	chr10:90512446-90512505	hs|10q23.31
2.11789	-2.11789	-1.08263	down	MTBP	MDM2 binding protein	Homo sapiens MDM2 binding protein (MTBP), mRNA [NM_022045]	chr8:121534934-121535571	hs|8q24.12
2.11728	-2.11728	-1.08222	down	TNFAIP8L3	tumor necrosis factor, alpha-induced protein 8-like 3	Homo sapiens tumor necrosis factor, alpha-induced protein 8-like 3 (TNFAIP8L3), mRNA [NM_207381]	chr15:51349922-51349863	hs|15q21.2
2.11559	-2.11559	-1.08106	down	lnc-SERAC1-1	lnc-SERAC1-1:1	BX117128 Soares_NFL_T_GBC_S1 Homo sapiens cDNA clone IMAGp998H103715, mRNA sequence [BX117128]	chr6:158306304-158306245	hs|6q25.3
2.11507	2.11507	1.08071	up	FREM2	FRAS1 related extracellular matrix protein 2	Homo sapiens FRAS1 related extracellular matrix protein 2 (FREM2), mRNA [NM_207361]	chr13:39461187-39461246	hs|13q13.3
2.11468	-2.11468	-1.08044	down	NPY2R	neuropeptide Y receptor Y2	Homo sapiens neuropeptide Y receptor Y2 (NPY2R), mRNA [NM_000910]	chr4:156138043-156138102	hs|4q32.1
2.11422	2.11422	1.08013	up	HK2	hexokinase 2	Homo sapiens hexokinase 2 (HK2), mRNA [NM_000189]	chr2:75120331-75120390	hs|2p12
2.11419	-2.11419	-1.0801	down	HDAC2	histone deacetylase 2	Homo sapiens histone deacetylase 2 (HDAC2), transcript variant 1, mRNA [NM_001527]	chr6:114257403-114257344	hs|6q21
2.11376	2.11376	1.07981	up	VN1R4	vomeronasal 1 receptor 4	Homo sapiens vomeronasal 1 receptor 4 (VN1R4), mRNA [NM_173857]	chr19:53819159-53819218	hs|19q13.42
2.11359	-2.11359	-1.0797	down	XPNPEP3	X-prolyl aminopeptidase (aminopeptidase P) 3, putative	Homo sapiens X-prolyl aminopeptidase (aminopeptidase P) 3, putative (XPNPEP3), transcript variant 2, mRNA [NM_001204827]	chr22:41258712-41258771	hs|22q13.2
2.11182	2.11182	1.07848	up	LOC101928131	uncharacterized LOC101928131	Homo sapiens uncharacterized LOC101928131 (LOC101928131), long non-coding RNA [NR_121677]	chr4:166652733-166652674	hs|4q32.3
2.11022	-2.11022	-1.07739	down	IQCH	IQ motif containing H	Homo sapiens IQ motif containing H (IQCH), transcript variant 1, mRNA [NM_001031715]	chr15:67793350-67793409	hs|15q23
2.10969	2.10969	1.07703	up	LEFTY2	left-right determination factor 2	Homo sapiens left-right determination factor 2 (LEFTY2), transcript variant 1, mRNA [NM_003240]	chr1:226125133-226125074	hs|1q42.12
2.10961	2.10961	1.07698	up	CFAP43	cilia and flagella associated protein 43	cilia and flagella associated protein 43 [Source:HGNC Symbol;Acc:HGNC:26684] [ENST00000369720]	chr10:105952399-105952340	hs|10q25.1
2.10872	2.10872	1.07637	up	PNPLA3	patatin-like phospholipase domain containing 3	Homo sapiens patatin-like phospholipase domain containing 3 (PNPLA3), mRNA [NM_025225]	chr22:44342759-44342818	hs|22q13.31
2.10797	2.10797	1.07585	up	LOC100996693	CAVP-target protein-like	Homo sapiens CAVP-target protein-like (LOC100996693), mRNA [NM_001286811]	chr2:220362450-220362509	hs|2q35
2.10733	-2.10733	-1.07542	down	MICAL3	microtubule associated monooxygenase, calponin and LIM domain containing 3	Homo sapiens microtubule associated monooxygenase, calponin and LIM domain containing 3 (MICAL3), transcript variant 2, mRNA [NM_001136004]	chr22:18343047-18342988	hs|22q11.21
2.10712	-2.10712	-1.07527	down	LOC101929494	uncharacterized LOC101929494	PREDICTED: Homo sapiens uncharacterized LOC101929494 (LOC101929494), transcript variant X3, ncRNA [XR_424822]	chr17:36607637-36607578	hs|17q12
2.10692	2.10692	1.07513	up	SYNDIG1	synapse differentiation inducing 1	Homo sapiens synapse differentiation inducing 1 (SYNDIG1), mRNA [NM_024893]	chr20:24647022-24647081	hs|20p11.21
2.10614	2.10614	1.0746	up	MX2	MX dynamin-like GTPase 2	Homo sapiens MX dynamin-like GTPase 2 (MX2), mRNA [NM_002463]	chr21:42780501-42780560	hs|21q22.3
2.10596	2.10596	1.07448	up	CR2	complement component (3d/Epstein Barr virus) receptor 2	Homo sapiens complement component (3d/Epstein Barr virus) receptor 2 (CR2), transcript variant 1, mRNA [NM_001006658]	chr1:207663116-207663175	hs|1q32.2
2.10586	-2.10586	-1.07441	down	ABHD17B	abhydrolase domain containing 17B	Homo sapiens abhydrolase domain containing 17B (ABHD17B), transcript variant 1, mRNA [NM_016014]	chr9:74481744-74477494	hs|9q21.13
2.10547	-2.10547	-1.07415	down	MFAP4	microfibrillar-associated protein 4	Homo sapiens microfibrillar-associated protein 4 (MFAP4), transcript variant 2, mRNA [NM_002404]	chr17:19286872-19286813	hs|17p11.2
2.10503	2.10503	1.07384	up	lnc-ZMAT4-3	lnc-ZMAT4-3:3	AGENCOURT_8903005 NIH_MGC_141 Homo sapiens cDNA clone IMAGE:6389455 5', mRNA sequence [BU590318]	chr8:40200846-40162293	hs|8p11.21
2.10413	-2.10413	-1.07322	down	KRT19	keratin 19, type I	Homo sapiens keratin 19, type I (KRT19), mRNA [NM_002276]	chr17:39679977-39679918	hs|17q21.2
2.10383	-2.10383	-1.07302	down	GMDS	GDP-mannose 4,6-dehydratase	GDP-mannose 4,6-dehydratase [Source:HGNC Symbol;Acc:HGNC:4369] [ENST00000380805]	chr6:1930538-1930479	hs|6p25.3
2.10272	2.10272	1.07226	up	SLC6A9	solute carrier family 6 (neurotransmitter transporter, glycine), member 9	Homo sapiens solute carrier family 6 (neurotransmitter transporter, glycine), member 9 (SLC6A9), transcript variant 2, mRNA [NM_201649]	chr1:44466646-44466499	hs|1p34.1
2.10259	-2.10259	-1.07217	down	C1R	complement component 1, r subcomponent	Homo sapiens complement component 1, r subcomponent (C1R), mRNA [NM_001733]	chr12:7187895-7187836	hs|12p13.31
2.1025	-2.1025	-1.07211	down	ABCA8	ATP-binding cassette, sub-family A (ABC1), member 8	Homo sapiens ATP-binding cassette, sub-family A (ABC1), member 8 (ABCA8), transcript variant 2, mRNA [NM_007168]	chr17:66865909-66865850	hs|17q24.2
2.10089	2.10089	1.071	up	TTLL10	tubulin tyrosine ligase-like family member 10	Homo sapiens tubulin tyrosine ligase-like family member 10 (TTLL10), transcript variant 2, mRNA [NM_153254]	chr1:1120389-1120448	hs|1p36.33
2.10001	2.10001	1.0704	up	LINC01411	long intergenic non-protein coding RNA 1411	long intergenic non-protein coding RNA 1411 [Source:HGNC Symbol;Acc:HGNC:50703] [ENST00000506862]	chr5:173959347-173959406	hs|5q35.2
2.09931	-2.09931	-1.06991	down	THBS2	thrombospondin 2	Homo sapiens thrombospondin 2 (THBS2), mRNA [NM_003247]	chr6:169615960-169615901	hs|6q27
2.09926	-2.09926	-1.06988	down	PRKAR2A-AS1	PRKAR2A antisense RNA 1	Homo sapiens PRKAR2A antisense RNA 1 (PRKAR2A-AS1), transcript variant 1, long non-coding RNA [NR_109996]	chr3:48886549-48886608	hs|3p21.31
2.09861	-2.09861	-1.06944	down	WHSC1	Wolf-Hirschhorn syndrome candidate 1	Homo sapiens Wolf-Hirschhorn syndrome candidate 1 (WHSC1), transcript variant 7, mRNA [NM_133334]	chr4:1949509-1949568	hs|4p16.3
2.09796	2.09796	1.06899	up	DEFA4	defensin, alpha 4, corticostatin	Homo sapiens defensin, alpha 4, corticostatin (DEFA4), mRNA [NM_001925]	chr8:6793424-6793365	hs|8p23.1
2.09776	2.09776	1.06885	up	lnc-ROBO2-1	lnc-ROBO2-1:1	BX109067 Soares_NFL_T_GBC_S1 Homo sapiens cDNA clone IMAGp998I033812, mRNA sequence [BX109067]	chr3:78114256-78114566	hs|3p12.3
2.09762	-2.09762	-1.06875	down	KIAA0355	KIAA0355	Homo sapiens KIAA0355 (KIAA0355), mRNA [NM_014686]	chr19:34846363-34846422	hs|19q13.11
2.09682	2.09682	1.06821	up	SPZ1	spermatogenic leucine zipper 1	Homo sapiens spermatogenic leucine zipper 1 (SPZ1), mRNA [NM_032567]	chr5:79616947-79617006	hs|5q14.1
2.09674	2.09674	1.06815	up	OR10A4	olfactory receptor, family 10, subfamily A, member 4	Homo sapiens olfactory receptor, family 10, subfamily A, member 4 (OR10A4), mRNA [NM_207186]	chr11:6898050-6898109	hs|11p15.4
2.09607	2.09607	1.06769	up	HAS1	hyaluronan synthase 1	Homo sapiens hyaluronan synthase 1 (HAS1), transcript variant 1, mRNA [NM_001523]	chr19:52216452-52216393	hs|19q13.41
2.09577	-2.09577	-1.06748	down	DAB2IP	DAB2 interacting protein	Homo sapiens DAB2 interacting protein (DAB2IP), transcript variant 2, mRNA [NM_138709]	chr9:124543789-124544627	hs|9q33.2
2.09559	2.09559	1.06735	up	LOC646588	uncharacterized LOC646588	PREDICTED: Homo sapiens uncharacterized LOC646588 (LOC646588), transcript variant X2, misc_RNA [XR_252185]	chr7:25634119-25634060	hs|7p15.2
2.09311	2.09311	1.06565	up	SPTA1	spectrin, alpha, erythrocytic 1	Homo sapiens spectrin, alpha, erythrocytic 1 (SPTA1), mRNA [NM_003126]	chr1:158580696-158580637	hs|1q23.1
2.09278	2.09278	1.06542	up	MRC1	mannose receptor, C type 1	Homo sapiens mannose receptor, C type 1 (MRC1), mRNA [NM_002438]	chr10:18199506-18199565	hs|10p12.33
2.09274	-2.09274	-1.0654	down	NRXN3	neurexin 3	Homo sapiens neurexin 3 (NRXN3), transcript variant 1, mRNA [NM_004796]	chr14:80271473-80271532	hs|14q31.1
2.0926	2.0926	1.06529	up	TRIM64	tripartite motif containing 64	Homo sapiens tripartite motif containing 64 (TRIM64), mRNA [NM_001136486]	chr11:89706584-89706643	hs|11q14.3
2.09177	-2.09177	-1.06473	down	TTC39A	tetratricopeptide repeat domain 39A	Homo sapiens tetratricopeptide repeat domain 39A (TTC39A), transcript variant 2, mRNA [NM_001080494]	chr1:51753563-51753504	hs|1p32.3
2.09019	2.09019	1.06364	up	LOC101926959	uncharacterized LOC101926959	PREDICTED: Homo sapiens uncharacterized LOC101926959 (LOC101926959), ncRNA [XR_244897]	chr2:96334365-96334424	hs|2q11.1
2.09015	-2.09015	-1.06361	down	BACH2	BTB and CNC homology 1, basic leucine zipper transcription factor 2	Homo sapiens BTB and CNC homology 1, basic leucine zipper transcription factor 2 (BACH2), transcript variant 1, mRNA [NM_021813]	chr6:90641269-90641210	hs|6q15
2.08975	-2.08975	-1.06333	down	GFM1	G elongation factor, mitochondrial 1	G elongation factor, mitochondrial 1 [Source:HGNC Symbol;Acc:HGNC:13780] [ENST00000312756]	chr3:158373684-158373743	hs|3q25.32
2.0891	2.0891	1.06288	up	lnc-CTD-2054N24.2.1-1	lnc-CTD-2054N24.2.1-1:1	Q9GLG9_SAGOE (Q9GLG9) CD81 (Fragment), partial (8%) [THC2542372]	chr15:100513984-100514043	hs|15q26.3
2.08869	-2.08869	-1.0626	down	lnc-AKTIP-1	lnc-AKTIP-1:2	LNCipedia lincRNA (lnc-AKTIP-1), lincRNA [lnc-AKTIP-1:2]	chr16:53075950-53075891	hs|16q12.2
2.08862	-2.08862	-1.06255	down	MICU1	mitochondrial calcium uptake 1	mitochondrial calcium uptake 1 [Source:HGNC Symbol;Acc:HGNC:1530] [ENST00000603173]	chr10:74292845-74292786	hs|10q22.1
2.08826	-2.08826	-1.0623	down	APOL5	apolipoprotein L, 5	Homo sapiens apolipoprotein L, 5 (APOL5), mRNA [NM_030642]	chr22:36125425-36125484	hs|22q12.3
2.0882	-2.0882	-1.06226	down	FZD7	frizzled class receptor 7	Homo sapiens frizzled class receptor 7 (FZD7), mRNA [NM_003507]	chr2:202902930-202902989	hs|2q33.1
2.08804	2.08804	1.06215	up	PROL1	proline rich, lacrimal 1	Homo sapiens proline rich, lacrimal 1 (PROL1), transcript variant 1, mRNA [NM_021225]	chr4:71275298-71275357	hs|4q13.3
2.08706	2.08706	1.06147	up	SLC5A4	solute carrier family 5 (glucose activated ion channel), member 4	Homo sapiens solute carrier family 5 (glucose activated ion channel), member 4 (SLC5A4), mRNA [NM_014227]	chr22:32620467-32620408	hs|22q12.3
2.08345	-2.08345	-1.05898	down	ZC2HC1A	zinc finger, C2HC-type containing 1A	Homo sapiens zinc finger, C2HC-type containing 1A (ZC2HC1A), mRNA [NM_016010]	chr8:79631797-79631856	hs|8q21.12
2.08235	-2.08235	-1.05821	down	DCLK2	doublecortin-like kinase 2	Homo sapiens doublecortin-like kinase 2 (DCLK2), transcript variant 2, mRNA [NM_001040261]	chr4:151170764-151170823	hs|4q31.3
2.07861	-2.07861	-1.05562	down	CRHR2	corticotropin releasing hormone receptor 2	Homo sapiens corticotropin releasing hormone receptor 2 (CRHR2), transcript variant 1, mRNA [NM_001883]	chr7:30695225-30694667	hs|7p14.3
2.07826	2.07826	1.05538	up	CD36	CD36 molecule (thrombospondin receptor)	Homo sapiens CD36 molecule (thrombospondin receptor) (CD36), transcript variant 2, mRNA [NM_001001547]	chr7:80302711-80303343	hs|7q21.11
2.07766	-2.07766	-1.05496	down	AKAP12	A kinase (PRKA) anchor protein 12	Homo sapiens A kinase (PRKA) anchor protein 12 (AKAP12), transcript variant 1, mRNA [NM_005100]	chr6:151679428-151679487	hs|6q25.1
2.07721	2.07721	1.05465	up	C1QTNF7	C1q and tumor necrosis factor related protein 7	Homo sapiens C1q and tumor necrosis factor related protein 7 (C1QTNF7), transcript variant 3, mRNA [NM_031911]	chr4:15446726-15446785	hs|4p15.32
2.07704	-2.07704	-1.05453	down	ZNF737	zinc finger protein 737	Homo sapiens zinc finger protein 737 (ZNF737), mRNA [NM_001159293]	chr19:20723639-20723580	hs|19p12
2.07612	-2.07612	-1.05389	down	LEPR	leptin receptor	Homo sapiens leptin receptor (LEPR), transcript variant 5, mRNA [NM_001198688]	chr1:66088604-66088663	hs|1p31.3
2.07575	2.07575	1.05363	up	CSF1	colony stimulating factor 1 (macrophage)	Homo sapiens colony stimulating factor 1 (macrophage) (CSF1), transcript variant 2, mRNA [NM_172210]	chr1:110466137-110466196	hs|1p13.3
2.07564	-2.07564	-1.05356	down	CCDC170	coiled-coil domain containing 170	Homo sapiens coiled-coil domain containing 170 (CCDC170), mRNA [NM_025059]	chr6:151942097-151942156	hs|6q25.1
2.07387	-2.07387	-1.05233	down	RRP12	ribosomal RNA processing 12 homolog (S. cerevisiae)	ribosomal RNA processing 12 homolog (S. cerevisiae) [Source:HGNC Symbol;Acc:HGNC:29100] [ENST00000621606]	chr10:99179122-99179063	hs|10q24.1
2.07376	-2.07376	-1.05225	down	GALNT4	polypeptide N-acetylgalactosaminyltransferase 4	Homo sapiens polypeptide N-acetylgalactosaminyltransferase 4 (GALNT4), mRNA [NM_003774]	chr12:89913563-89913504	hs|12q21.33
2.07234	-2.07234	-1.05126	down	PRRX2	paired related homeobox 2	Homo sapiens paired related homeobox 2 (PRRX2), mRNA [NM_016307]	chr9:132484873-132484932	hs|9q34.11
2.07159	-2.07159	-1.05074	down	BAALC	brain and acute leukemia, cytoplasmic	Homo sapiens brain and acute leukemia, cytoplasmic (BAALC), transcript variant 1, mRNA [NM_024812]	chr8:104242447-104242506	hs|8q22.3
2.07156	2.07156	1.05072	up	MT1X	metallothionein 1X	Homo sapiens metallothionein 1X (MT1X), mRNA [NM_005952]	chr16:56717082-56717141	hs|16q13
2.07083	-2.07083	-1.05021	down	PITPNM3	PITPNM family member 3	Homo sapiens PITPNM family member 3 (PITPNM3), transcript variant 1, mRNA [NM_031220]	chr17:6361036-6360977	hs|17p13.2
2.06914	2.06914	1.04903	up	ACVR1C	activin A receptor, type IC	Homo sapiens activin A receptor, type IC (ACVR1C), transcript variant 1, mRNA [NM_145259]	chr2:158384001-158383942	hs|2q24.1
2.06772	-2.06772	-1.04804	down	BCL2	B-cell CLL/lymphoma 2	Homo sapiens B-cell CLL/lymphoma 2 (BCL2), transcript variant alpha, mRNA [NM_000633]	chr18:60790782-60790723	hs|18q21.33
2.06766	2.06766	1.048	up	MT1B	metallothionein 1B	Homo sapiens metallothionein 1B (MT1B), mRNA [NM_005947]	chr16:56686948-56687007	hs|16q12.2
2.06679	2.06679	1.04739	up	PCSK6	proprotein convertase subtilisin/kexin type 6	Homo sapiens proprotein convertase subtilisin/kexin type 6 (PCSK6), transcript variant 3, mRNA [NM_138322]	chr15:101929695-101924598	hs|15q26.3
2.06648	-2.06648	-1.04717	down	SLC38A4	solute carrier family 38, member 4	Homo sapiens solute carrier family 38, member 4 (SLC38A4), transcript variant 1, mRNA [NM_018018]	chr12:47173627-47173568	hs|12q13.11
2.06637	2.06637	1.0471	up	VEGFA	vascular endothelial growth factor A	Homo sapiens vascular endothelial growth factor A (VEGFA), transcript variant 1, mRNA [NM_001025366]	chr6:43753511-43753570	hs|6p21.1
2.06583	-2.06583	-1.04672	down	LINC01336	long intergenic non-protein coding RNA 1336	Homo sapiens long intergenic non-protein coding RNA 1336 (LINC01336), long non-coding RNA [NR_126375]	chr5:74343612-74343553	hs|5q13.3
2.06519	-2.06519	-1.04627	down	LOC101926944	uncharacterized LOC101926944	Homo sapiens uncharacterized LOC101926944 (LOC101926944), long non-coding RNA [NR_110627]	chr1:60254330-60254389	hs|1p32.1
2.06445	2.06445	1.04575	up	ANGPTL4	angiopoietin-like 4	Homo sapiens angiopoietin-like 4 (ANGPTL4), transcript variant 1, mRNA [NM_139314]	chr19:8439197-8439256	hs|19p13.2
2.06407	-2.06407	-1.04549	down	KLHL31	kelch-like family member 31	Homo sapiens kelch-like family member 31 (KLHL31), mRNA [NM_001003760]	chr6:53516455-53516396	hs|6p12.1
2.06397	2.06397	1.04542	up	KRTAP19-8	keratin associated protein 19-8	Homo sapiens keratin associated protein 19-8 (KRTAP19-8), mRNA [NM_001099219]	chr21:32410537-32410478	hs|21q22.11
2.06385	-2.06385	-1.04534	down	KRT82	keratin 82, type II	Homo sapiens keratin 82, type II (KRT82), mRNA [NM_033033]	chr12:52788135-52788076	hs|12q13.13
2.06306	2.06306	1.04478	up	ACSM2B	acyl-CoA synthetase medium-chain family member 2B	Homo sapiens acyl-CoA synthetase medium-chain family member 2B (ACSM2B), transcript variant 1, mRNA [NM_182617]	chr16:20548589-20548530	hs|16p12.3
2.06295	-2.06295	-1.04471	down	NKD2	naked cuticle homolog 2 (Drosophila)	Homo sapiens naked cuticle homolog 2 (Drosophila) (NKD2), transcript variant 1, mRNA [NM_033120]	chr5:1038719-1038778	hs|5p15.33
2.06291	2.06291	1.04468	up	AKR1B1	aldo-keto reductase family 1, member B1 (aldose reductase)	Homo sapiens aldo-keto reductase family 1, member B1 (aldose reductase) (AKR1B1), mRNA [NM_001628]	chr7:134132097-134130061	hs|7q33
2.06281	-2.06281	-1.04461	down	CYTH3	cytohesin 3	Homo sapiens cytohesin 3 (CYTH3), mRNA [NM_004227]	chr7:6201473-6201414	hs|7p22.1
2.06266	2.06266	1.0445	up	DDIT4	DNA-damage-inducible transcript 4	Homo sapiens DNA-damage-inducible transcript 4 (DDIT4), mRNA [NM_019058]	chr10:74035363-74035422	hs|10q22.1
2.06247	-2.06247	-1.04437	down	ABCB4	ATP-binding cassette, sub-family B (MDR/TAP), member 4	Homo sapiens ATP-binding cassette, sub-family B (MDR/TAP), member 4 (ABCB4), transcript variant B, mRNA [NM_018849]	chr7:87031442-87031383	hs|7q21.12
2.06229	-2.06229	-1.04425	down	DHRS13	dehydrogenase/reductase (SDR family) member 13	Homo sapiens dehydrogenase/reductase (SDR family) member 13 (DHRS13), mRNA [NM_144683]	chr17:27225108-27225049	hs|17q11.2
2.06217	2.06217	1.04416	up	TEX36	testis expressed 36	Homo sapiens testis expressed 36 (TEX36), mRNA [NM_001128202]	chr10:127344608-127344549	hs|10q26.13
2.06205	2.06205	1.04408	up	OAS3	2'-5'-oligoadenylate synthetase 3, 100kDa	Homo sapiens 2'-5'-oligoadenylate synthetase 3, 100kDa (OAS3), mRNA [NM_006187]	chr12:113405902-113405961	hs|12q24.13
2.06138	2.06138	1.04361	up	EVI2B	ecotropic viral integration site 2B	Homo sapiens ecotropic viral integration site 2B (EVI2B), mRNA [NM_006495]	chr17:29631839-29631780	hs|17q11.2
2.06133	-2.06133	-1.04358	down	NAA35	N(alpha)-acetyltransferase 35, NatC auxiliary subunit	N(alpha)-acetyltransferase 35, NatC auxiliary subunit [Source:HGNC Symbol;Acc:HGNC:24340] [ENST00000416045]	chr9:88581526-88581585	hs|9q21.33
2.05962	2.05962	1.04238	up	BTN1A1	butyrophilin, subfamily 1, member A1	Homo sapiens butyrophilin, subfamily 1, member A1 (BTN1A1), mRNA [NM_001732]	chr6:26510090-26510149	hs|6p22.2
2.0584	2.0584	1.04152	up	SLCO1B3	solute carrier organic anion transporter family, member 1B3	Homo sapiens solute carrier organic anion transporter family, member 1B3 (SLCO1B3), mRNA [NM_019844]	chr12:21036476-21036535	hs|12p12.2
2.05742	2.05742	1.04084	up	MUC3A	mucin 3A, cell surface associated	Homo sapiens mucin 3A, cell surface associated (MUC3A), mRNA [NM_005960]	chr7:100610746-100610805	hs|7q22.1
2.05715	2.05715	1.04064	up	HYDIN	HYDIN, axonemal central pair apparatus protein	Homo sapiens HYDIN, axonemal central pair apparatus protein (HYDIN), transcript variant 1, mRNA [NM_001270974]	chr16:70841747-70841688	hs|16q22.2
2.05683	-2.05683	-1.04043	down	GKN2	gastrokine 2	Homo sapiens gastrokine 2 (GKN2), mRNA [NM_182536]	chr2:69172471-69172412	hs|2p13.3
2.05606	-2.05606	-1.03988	down	LOC101926975	uncharacterized LOC101926975	Homo sapiens uncharacterized LOC101926975 (LOC101926975), long non-coding RNA [NR_110558]	chr5:142140019-142140078	hs|5q31.3
2.05586	-2.05586	-1.03974	down	STK38L	serine/threonine kinase 38 like	Homo sapiens serine/threonine kinase 38 like (STK38L), mRNA [NM_015000]	chr12:27478395-27478454	hs|12p11.23
2.05574	-2.05574	-1.03966	down	F2R	coagulation factor II (thrombin) receptor	Homo sapiens coagulation factor II (thrombin) receptor (F2R), mRNA [NM_001992]	chr5:76030669-76030728	hs|5q13.3
2.05514	2.05514	1.03924	up	lnc-AADAT-2	lnc-AADAT-2:1	BX113007 Soares_testis_NHT Homo sapiens cDNA clone IMAGp998N131785, mRNA sequence [BX113007]	chr4:171200925-171200866	hs|4q33
2.05494	-2.05494	-1.0391	down	VWA1	von Willebrand factor A domain containing 1	Homo sapiens von Willebrand factor A domain containing 1 (VWA1), transcript variant 1, mRNA [NM_022834]	chr1:1376086-1376145	hs|1p36.33
2.05345	2.05345	1.03805	up	LRRIQ1	leucine-rich repeats and IQ motif containing 1	leucine-rich repeats and IQ motif containing 1 [Source:HGNC Symbol;Acc:HGNC:25708] [ENST00000525971]	chr12:85518417-85518476	hs|12q21.31
2.05328	2.05328	1.03793	up	CYP19A1	cytochrome P450, family 19, subfamily A, polypeptide 1	Homo sapiens cytochrome P450, family 19, subfamily A, polypeptide 1, mRNA (cDNA clone IMAGE:5588077), complete cds. [BC035714]	chr15:51513831-51513772	hs|15q21.2
2.05185	2.05185	1.03692	up	SOWAHA	sosondowah ankyrin repeat domain family member A	Homo sapiens sosondowah ankyrin repeat domain family member A (SOWAHA), mRNA [NM_175873]	chr5:132150945-132151004	hs|5q31.1
2.05103	2.05103	1.03635	up	TM4SF1-AS1	TM4SF1 antisense RNA 1	Homo sapiens TM4SF1 antisense RNA 1 (TM4SF1-AS1), transcript variant 1, long non-coding RNA [NR_109809]	chr3:149104273-149104332	hs|3q25.1
2.05096	-2.05096	-1.0363	down	RNF166	ring finger protein 166	Homo sapiens ring finger protein 166 (RNF166), transcript variant 1, mRNA [NM_178841]	chr16:88763431-88763372	hs|16q24.3
2.04967	2.04967	1.0354	up	OR9G4	olfactory receptor, family 9, subfamily G, member 4	Homo sapiens olfactory receptor, family 9, subfamily G, member 4 (OR9G4), mRNA [NM_001005284]	chr11:56510363-56510304	hs|11q12.1
2.04903	-2.04903	-1.03494	down	TEK	TEK tyrosine kinase, endothelial	Homo sapiens TEK tyrosine kinase, endothelial (TEK), transcript variant 1, mRNA [NM_000459]	chr9:27230070-27230129	hs|9p21.2
2.04847	-2.04847	-1.03455	down	ECHDC1	ethylmalonyl-CoA decarboxylase 1	enoyl CoA hydratase domain containing 1 [Source:HGNC Symbol;Acc:HGNC:21489] [ENST00000368287]	chr6:127648085-127648026	hs|6q22.33
2.04767	2.04767	1.03398	up	MTMR3	myotubularin related protein 3	Homo sapiens myotubularin related protein 3 (MTMR3), transcript variant 3, mRNA [NM_021090]	chr22:30426759-30426818	hs|22q12.2
2.04692	2.04692	1.03346	up	CHAC1	ChaC glutathione-specific gamma-glutamylcyclotransferase 1	Homo sapiens ChaC glutathione-specific gamma-glutamylcyclotransferase 1 (CHAC1), transcript variant 1, mRNA [NM_024111]	chr15:41248631-41248690	hs|15q15.1
2.04561	-2.04561	-1.03253	down	AXIN2	axin 2	Homo sapiens axin 2 (AXIN2), mRNA [NM_004655]	chr17:63525448-63525389	hs|17q24.1
2.04532	-2.04532	-1.03233	down	STK17B	serine/threonine kinase 17b	Homo sapiens serine/threonine kinase 17b (apoptosis-inducing), mRNA (cDNA clone IMAGE:6280720), partial cds. [BC052561]	chr2:197034187-197034128	hs|2q32.3
2.04389	2.04389	1.03132	up	REXO1L2P	REX1, RNA exonuclease 1 homolog (S. cerevisiae)-like 2 (pseudogene)	Homo sapiens REX1, RNA exonuclease 1 homolog (S. cerevisiae)-like 2 (pseudogene) (REXO1L2P), non-coding RNA [NR_003594]	chr8:86775439-86775380	hs|8q21.2
2.04269	2.04269	1.03047	up	IL2	interleukin 2	Homo sapiens interleukin 2 (IL2), mRNA [NM_000586]	chr4:123374948-123374889	hs|4q27
2.0425	-2.0425	-1.03033	down	LOC339260	uncharacterized LOC339260	Homo sapiens uncharacterized LOC339260 (LOC339260), long non-coding RNA [NR_123730]	chr17:20861627-20861686	hs|17p11.2
2.0415	-2.0415	-1.02963	down	BTBD18	BTB (POZ) domain containing 18	Homo sapiens BTB (POZ) domain containing 18 (BTBD18), mRNA [NM_001145101]	chr11:57511444-57511385	hs|11q12.1
2.04108	-2.04108	-1.02933	down	KAZALD1	Kazal-type serine peptidase inhibitor domain 1	Homo sapiens Kazal-type serine peptidase inhibitor domain 1 (KAZALD1), mRNA [NM_030929]	chr10:102825270-102825329	hs|10q24.31
2.04068	-2.04068	-1.02905	down	PTGER4	prostaglandin E receptor 4 (subtype EP4)	Homo sapiens prostaglandin E receptor 4 (subtype EP4) (PTGER4), mRNA [NM_000958]	chr5:40693563-40693622	hs|5p13.1
2.04021	2.04021	1.02872	up	OR8B12	olfactory receptor, family 8, subfamily B, member 12	Homo sapiens olfactory receptor, family 8, subfamily B, member 12 (OR8B12), mRNA [NM_001005195]	chr11:124412677-124412618	hs|11q24.2
2.03943	-2.03943	-1.02816	down	ADAMTSL2	ADAMTS-like 2	Homo sapiens ADAMTS-like 2 (ADAMTSL2), transcript variant 1, mRNA [NM_014694]	chr9:136440581-136440640	hs|9q34.2
2.03917	-2.03917	-1.02798	down	lnc-C7orf11-5	lnc-C7orf11-5:1	Q7M4L7_HUMAN (Q7M4L7) Galactosylceramide-like protein, GCP, partial (25%) [THC2719594]	chr7:39660071-39660012	hs|7p14.1
2.03884	-2.03884	-1.02775	down	TAS1R1	taste receptor, type 1, member 1	Homo sapiens taste receptor, type 1, member 1 (TAS1R1), transcript variant 2, mRNA [NM_138697]	chr1:6639753-6639812	hs|1p36.31
2.03762	2.03762	1.02688	up	lnc-DAOA-1	lnc-DAOA-1:1	RST20997 Athersys RAGE Library Homo sapiens cDNA, mRNA sequence [BG201656]	chr13:106066488-106066547	hs|13q33.2
2.03625	2.03625	1.02592	up	CSF1	colony stimulating factor 1 (macrophage)	Homo sapiens colony stimulating factor 1 (macrophage) (CSF1), transcript variant 1, mRNA [NM_000757]	chr1:110472240-110472299	hs|1p13.3
2.03526	2.03526	1.02521	up	LRRC3B	leucine rich repeat containing 3B	Homo sapiens leucine rich repeat containing 3B (LRRC3B), mRNA [NM_052953]	chr3:26751927-26751986	hs|3p24.1
2.03495	2.03495	1.02499	up	CIITA	class II, major histocompatibility complex, transactivator	Homo sapiens class II, major histocompatibility complex, transactivator (CIITA), transcript variant 2, mRNA [NM_000246]	chr16:11018667-11018726	hs|16p13.13
2.03459	-2.03459	-1.02474	down	TRMT13	tRNA methyltransferase 13 homolog (S. cerevisiae)	tRNA methyltransferase 13 homolog (S. cerevisiae) [Source:HGNC Symbol;Acc:HGNC:25502] [ENST00000370139]	chr1:100606309-100606368	hs|1p21.2
2.03431	-2.03431	-1.02454	down	NEDD4L	neural precursor cell expressed, developmentally down-regulated 4-like, E3 ubiquitin protein ligase	Homo sapiens neural precursor cell expressed, developmentally down-regulated 4-like, E3 ubiquitin protein ligase (NEDD4L), transcript variant j, mRNA [NM_001144967]	chr18:56068043-56068102	hs|18q21.31
2.03325	2.03325	1.02379	up	OR8H2	olfactory receptor, family 8, subfamily H, member 2	Homo sapiens olfactory receptor, family 8, subfamily H, member 2 (OR8H2), mRNA [NM_001005200]	chr11:55873240-55873299	hs|11q12.1
2.03311	2.03311	1.02369	up	KIF5C	kinesin family member 5C	Homo sapiens kinesin family member 5C (KIF5C), transcript variant 1, mRNA [NM_004522]	chr2:149883078-149883137	hs|2q23.1
2.03273	-2.03273	-1.02342	down	TSPAN18	tetraspanin 18	Homo sapiens tetraspanin 18 (TSPAN18), mRNA [NM_130783]	chr11:44952695-44952754	hs|11p11.2
2.03268	-2.03268	-1.02338	down	TRIM59	tripartite motif containing 59	Homo sapiens tripartite motif containing 59 (TRIM59), mRNA [NM_173084]	chr3:160153585-160153526	hs|3q25.33
2.03223	-2.03223	-1.02306	down	FAM65C	family with sequence similarity 65, member C	Homo sapiens family with sequence similarity 65, member C (FAM65C), transcript variant 2, mRNA [NM_001290268]	chr20:49202794-49202735	hs|20q13.13
2.03216	-2.03216	-1.02302	down	TNFRSF25	tumor necrosis factor receptor superfamily, member 25	Homo sapiens tumor necrosis factor receptor superfamily, member 25 (TNFRSF25), transcript variant 12, mRNA [NM_001039664]	chr1:6524263-6524204	hs|1p36.31
2.03187	-2.03187	-1.0228	down	PLCL2	phospholipase C-like 2	Homo sapiens phospholipase C-like 2 (PLCL2), transcript variant 2, mRNA [NM_015184]	chr3:17131469-17131528	hs|3p24.3
2.03151	2.03151	1.02255	up	LOC101929567	uncharacterized LOC101929567	Homo sapiens uncharacterized LOC101929567 (LOC101929567), long non-coding RNA [NR_110257]	chr2:8710663-8710604	hs|2p25.1
2.03098	-2.03098	-1.02217	down	RAB6B	RAB6B, member RAS oncogene family	Homo sapiens RAB6B, member RAS oncogene family (RAB6B), mRNA [NM_016577]	chr3:133543498-133543439	hs|3q22.1
2.03028	-2.03028	-1.02168	down	CYB5B	cytochrome b5 type B (outer mitochondrial membrane)	Homo sapiens cytochrome b5 type B (outer mitochondrial membrane) (CYB5B), mRNA [NM_030579]	chr16:69500108-69500167	hs|16q22.1
2.02951	2.02951	1.02113	up	OR2L5	olfactory receptor, family 2, subfamily L, member 5	Homo sapiens olfactory receptor, family 2, subfamily L, member 5 (OR2L5), mRNA [NM_001258284]	chr1:248185781-248185840	hs|1q44
2.02936	-2.02936	-1.02103	down	UBA5	ubiquitin-like modifier activating enzyme 5	ubiquitin-like modifier activating enzyme 5 [Source:HGNC Symbol;Acc:HGNC:23230] [ENST00000480955]	chr3:132378770-132378829	hs|3q22.1
2.02862	2.02862	1.0205	up	LOC100131472	uncharacterized LOC100131472	PREDICTED: Homo sapiens uncharacterized LOC100131472 (LOC100131472), misc_RNA [XR_426131]	chr7:10746974-10747033	hs|7p21.3
2.02841	2.02841	1.02035	up	MYRF	myelin regulatory factor	Homo sapiens myelin regulatory factor (MYRF), transcript variant 1, mRNA [NM_013279]	chr11:61545872-61545931	hs|11q12.2
2.02747	-2.02747	-1.01968	down	FSIP2	fibrous sheath interacting protein 2	Homo sapiens fibrous sheath interacting protein 2 (FSIP2), mRNA [NM_173651]	chr2:186692899-186696571	hs|2q32.1
2.02663	-2.02663	-1.01908	down	DCLK1	doublecortin-like kinase 1	Homo sapiens doublecortin-like kinase 1 (DCLK1), transcript variant 1, mRNA [NM_004734]	chr13:36343328-36343269	hs|13q13.3
2.0263	-2.0263	-1.01885	down	SLC39A8	solute carrier family 39 (zinc transporter), member 8	Homo sapiens solute carrier family 39 (zinc transporter), member 8 (SLC39A8), transcript variant 3, mRNA [NM_001135147]	chr4:103172475-103172416	hs|4q24
2.02613	2.02613	1.01873	up	NECAB2	N-terminal EF-hand calcium binding protein 2	Homo sapiens N-terminal EF-hand calcium binding protein 2 (NECAB2), mRNA [NM_019065]	chr16:84036014-84036073	hs|16q23.3
2.02491	-2.02491	-1.01786	down	RTKN2	rhotekin 2	Homo sapiens rhotekin 2 (RTKN2), transcript variant 1, mRNA [NM_145307]	chr10:63953284-63953225	hs|10q21.2
2.02461	-2.02461	-1.01764	down	FRAT1	frequently rearranged in advanced T-cell lymphomas 1	Homo sapiens frequently rearranged in advanced T-cell lymphomas 1 (FRAT1), mRNA [NM_005479]	chr10:99081604-99081663	hs|10q24.1
2.0241	-2.0241	-1.01728	down	KIT	v-kit Hardy-Zuckerman 4 feline sarcoma viral oncogene homolog	Homo sapiens v-kit Hardy-Zuckerman 4 feline sarcoma viral oncogene homolog (KIT), transcript variant 2, mRNA [NM_001093772]	chr4:55569965-55570024	hs|4q12
2.02394	-2.02394	-1.01717	down	LIMS2	LIM and senescent cell antigen-like domains 2	Homo sapiens LIM and senescent cell antigen-like domains 2 (LIMS2), transcript variant 5, mRNA [NM_001161404]	chr2:128396967-128396908	hs|2q14.3
2.02262	2.02262	1.01622	up	IL6R	interleukin 6 receptor	Homo sapiens interleukin 6 receptor (IL6R), transcript variant 1, mRNA [NM_000565]	chr1:154440037-154440096	hs|1q21.3
2.02152	2.02152	1.01544	up	RAB27B	RAB27B, member RAS oncogene family	Homo sapiens RAB27B, member RAS oncogene family (RAB27B), mRNA [NM_004163]	chr18:52556632-52556691	hs|18q21.2
2.02104	-2.02104	-1.01509	down	GLT8D2	glycosyltransferase 8 domain containing 2	glycosyltransferase 8 domain containing 2 [Source:HGNC Symbol;Acc:HGNC:24890] [ENST00000548660]	chr12:104444056-104443997	hs|12q23.3
2.02084	2.02084	1.01496	up	lnc-PDSS1-2	lnc-PDSS1-2:1	Q6NT14_HUMAN (Q6NT14) ZNF80 protein (Fragment), partial (7%) [THC2771295]	chr10:27198784-27198843	hs|10p12.1
2.02056	-2.02056	-1.01475	down	SERPING1	serpin peptidase inhibitor, clade G (C1 inhibitor), member 1	Homo sapiens serpin peptidase inhibitor, clade G (C1 inhibitor), member 1 (SERPING1), transcript variant 1, mRNA [NM_000062]	chr11:57373891-57373950	hs|11q12.1
2.02052	2.02052	1.01473	up	TENM2	teneurin transmembrane protein 2	Homo sapiens teneurin transmembrane protein 2 (TENM2), mRNA [NM_001122679]	chr5:167690063-167690122	hs|5q34
2.02048	-2.02048	-1.0147	down	ZNF233	zinc finger protein 233	Homo sapiens zinc finger protein 233 (ZNF233), transcript variant 1, mRNA [NM_181756]	chr19:44779060-44779119	hs|19q13.31
2.02033	2.02033	1.01459	up	ZBTB8B	zinc finger and BTB domain containing 8B	Homo sapiens zinc finger and BTB domain containing 8B (ZBTB8B), mRNA [NM_001145720]	chr1:32950872-32950931	hs|1p35.1
2.02006	-2.02006	-1.0144	down	HOXC11	homeobox C11	Homo sapiens homeobox C11 (HOXC11), mRNA [NM_014212]	chr12:54369250-54369309	hs|12q13.13
2.01941	-2.01941	-1.01394	down	TBC1D12	TBC1 domain family, member 12	Homo sapiens TBC1 domain family, member 12 (TBC1D12), mRNA [NM_015188]	chr10:96295315-96295374	hs|10q23.33
2.01904	2.01904	1.01367	up	MYL3	myosin, light chain 3, alkali; ventricular, skeletal, slow	Homo sapiens myosin, light chain 3, alkali; ventricular, skeletal, slow (MYL3), mRNA [NM_000258]	chr3:46902307-46902248	hs|3p21.31
2.01885	2.01885	1.01354	up	LOC101929628	uncharacterized LOC101929628	PREDICTED: Homo sapiens uncharacterized LOC101929628 (LOC101929628), transcript variant X4, ncRNA [XR_426319]	chr8:62797906-62797965	hs|8q12.3
2.01786	-2.01786	-1.01283	down	POU2F2	POU class 2 homeobox 2	Homo sapiens POU class 2 homeobox 2 (POU2F2), transcript variant 3, mRNA [NM_001207026]	chr19:42596079-42596020	hs|19q13.2
2.01779	2.01779	1.01277	up	OR6A2	olfactory receptor, family 6, subfamily A, member 2	Homo sapiens olfactory receptor, family 6, subfamily A, member 2 (OR6A2), mRNA [NM_003696]	chr11:6816141-6816082	hs|11p15.4
2.01746	2.01746	1.01254	up	PLCXD1	phosphatidylinositol-specific phospholipase C, X domain containing 1	Homo sapiens phosphatidylinositol-specific phospholipase C, X domain containing 1 (PLCXD1), transcript variant 1, mRNA [NM_018390]	chrX:208260-208319	hs|Xp22.33
2.01694	-2.01694	-1.01217	down	TRANK1	tetratricopeptide repeat and ankyrin repeat containing 1	Homo sapiens tetratricopeptide repeat and ankyrin repeat containing 1 (TRANK1), mRNA [NM_014831]	chr3:36868467-36868408	hs|3p22.2
2.01636	2.01636	1.01175	up	TMEM176B	transmembrane protein 176B	Homo sapiens transmembrane protein 176B (TMEM176B), transcript variant 1, mRNA [NM_014020]	chr7:150489208-150489149	hs|7q36.1
2.01584	-2.01584	-1.01138	down	LOC645195	uncharacterized LOC645195	Homo sapiens cDNA FLJ41456 fis, clone BRSTN2012320. [AK123450]	chr1:65721458-65721517	hs|1p31.3
2.0157	2.0157	1.01128	up	LOC401220	uncharacterized LOC401220	Homo sapiens hypothetical gene supported by BC036933, mRNA (cDNA clone IMAGE:5243701). [BC036933]	chr5:177432592-177432533	hs|5q35.3
2.01558	-2.01558	-1.0112	down	CEMIP	cell migration inducing protein, hyaluronan binding	Homo sapiens cell migration inducing protein, hyaluronan binding (CEMIP), transcript variant 3, mRNA [NM_018689]	chr15:81221504-81224247	hs|15q25.1
2.01508	2.01508	1.01084	up	CHRNA7	cholinergic receptor, nicotinic, alpha 7 (neuronal)	Homo sapiens cholinergic receptor, nicotinic, alpha 7 (neuronal) (CHRNA7), transcript variant 2, mRNA [NM_001190455]	chr15:32462222-32462281	hs|15q13.3
2.01298	-2.01298	-1.00934	down	PLK2	polo-like kinase 2	Homo sapiens polo-like kinase 2 (PLK2), transcript variant 1, mRNA [NM_006622]	chr5:57750052-57749993	hs|5q11.2
2.01279	2.01279	1.0092	up	LOC101929312	uncharacterized LOC101929312	Homo sapiens uncharacterized LOC101929312 (LOC101929312), long non-coding RNA [NR_110610]	chr20:7348914-7348973	hs|20p12.3
2.0118	2.0118	1.00849	up	ARHGAP20	Rho GTPase activating protein 20	Homo sapiens Rho GTPase activating protein 20 (ARHGAP20), transcript variant 1, mRNA [NM_020809]	chr11:110448123-110448064	hs|11q23.1
2.0117	-2.0117	-1.00841	down	FBLN5	fibulin 5	Homo sapiens fibulin 5 (FBLN5), mRNA [NM_006329]	chr14:92336140-92336081	hs|14q32.12
2.01167	-2.01167	-1.00839	down	PPP1R14A	protein phosphatase 1, regulatory (inhibitor) subunit 14A	Homo sapiens protein phosphatase 1, regulatory (inhibitor) subunit 14A (PPP1R14A), transcript variant 1, mRNA [NM_033256]	chr19:38743594-38743535	hs|19q13.2
2.01142	2.01142	1.00821	up	IFI44	interferon-induced protein 44	Homo sapiens interferon-induced protein 44 (IFI44), mRNA [NM_006417]	chr1:79128479-79128538	hs|1p31.1
2.01122	-2.01122	-1.00807	down	CHRDL1	chordin-like 1	Homo sapiens chordin-like 1 (CHRDL1), transcript variant 1, mRNA [NM_001143981]	chrX:109917279-109917220	hs|Xq23
2.01085	-2.01085	-1.0078	down	LOC100506014	uncharacterized LOC100506014	PREDICTED: Homo sapiens uncharacterized LOC100506014 (LOC100506014), transcript variant X2, ncRNA [XR_425355]	chr2:3579467-3579408	hs|2p25.3
2.01022	-2.01022	-1.00736	down	NOXRED1	NADP-dependent oxidoreductase domain containing 1	Homo sapiens NADP-dependent oxidoreductase domain containing 1 (NOXRED1), mRNA [NM_001113475]	chr14:77889087-77880421	hs|14q24.3
2.01005	-2.01005	-1.00723	down	COL21A1	collagen, type XXI, alpha 1	Homo sapiens collagen, type XXI, alpha 1 (COL21A1), mRNA [NM_030820]	chr6:55921701-55921642	hs|6p12.1
2.00941	2.00941	1.00677	up	C9	complement component 9	Homo sapiens complement component 9 (C9), mRNA [NM_001737]	chr5:39285131-39285072	hs|5p13.1
2.00911	-2.00911	-1.00656	down	STARD9	StAR-related lipid transfer (START) domain containing 9	Homo sapiens StAR-related lipid transfer (START) domain containing 9 (STARD9), mRNA [NM_020759]	chr15:42979340-42979399	hs|15q15.2
2.00904	-2.00904	-1.0065	down	TM7SF2	transmembrane 7 superfamily member 2	Homo sapiens transmembrane 7 superfamily member 2 (TM7SF2), transcript variant 1, mRNA [NM_003273]	chr11:64880991-64881050	hs|11q13.1
2.00887	-2.00887	-1.00638	down	COL8A2	collagen, type VIII, alpha 2	Homo sapiens collagen, type VIII, alpha 2 (COL8A2), transcript variant 1, mRNA [NM_005202]	chr1:36563361-36563302	hs|1p34.3
2.00853	-2.00853	-1.00614	down	ARVCF	armadillo repeat gene deleted in velocardiofacial syndrome	Homo sapiens armadillo repeat gene deleted in velocardiofacial syndrome (ARVCF), mRNA [NM_001670]	chr22:19957509-19957450	hs|22q11.21
2.00851	2.00851	1.00613	up	EPHB1	EPH receptor B1	Homo sapiens EPH receptor B1 (EPHB1), mRNA [NM_004441]	chr3:134978114-134978173	hs|3q22.2
2.0084	-2.0084	-1.00605	down	RPF1	ribosome production factor 1 homolog (S. cerevisiae)	ribosome production factor 1 homolog (S. cerevisiae) [Source:HGNC Symbol;Acc:HGNC:30350] [ENST00000370656]	chr1:84948889-84948948	hs|1p22.3
2.00681	2.00681	1.00491	up	KCNJ18	potassium channel, inwardly rectifying subfamily J, member 18	Homo sapiens potassium channel, inwardly rectifying subfamily J, member 18 (KCNJ18), mRNA [NM_001194958]	chr17:21320339-21320398	hs|17p11.2
2.00671	2.00671	1.00483	up	lnc-NRXN1-2	lnc-NRXN1-2:1	LNCipedia lincRNA (lnc-NRXN1-2), lincRNA [lnc-NRXN1-2:1]	chr2:51560712-51560653	hs|2p16.3
2.00558	-2.00558	-1.00402	down	PBXIP1	pre-B-cell leukemia homeobox interacting protein 1	Homo sapiens pre-B-cell leukemia homeobox interacting protein 1 (PBXIP1), mRNA [NM_020524]	chr1:154924007-154923948	hs|1q21.3
2.0047	2.0047	1.00339	up	CDH13	cadherin 13	Homo sapiens cadherin 13 (CDH13), transcript variant 5, mRNA [NM_001220491]	chr16:83214494-83214553	hs|16q23.3
2.00441	2.00441	1.00318	up	PECAM1	platelet/endothelial cell adhesion molecule 1	Homo sapiens platelet/endothelial cell adhesion molecule 1 (PECAM1), mRNA [NM_000442]	chr17:62407316-62407257	hs|17q23.3
2.00399	-2.00399	-1.00288	down	ARHGAP29	Rho GTPase activating protein 29	Rho GTPase activating protein 29 [Source:HGNC Symbol;Acc:HGNC:30207] [ENST00000370217]	chr1:94667593-94667534	hs|1p22.1
2.00384	-2.00384	-1.00276	down	LOC101927479	uncharacterized LOC101927479	PREDICTED: Homo sapiens uncharacterized LOC101927479 (LOC101927479), ncRNA [XR_241209]	chr1:16483544-16483603	hs|1p36.13
2.00329	2.00329	1.00237	up	UGT3A2	UDP glycosyltransferase 3 family, polypeptide A2	Homo sapiens UDP glycosyltransferase 3 family, polypeptide A2 (UGT3A2), transcript variant 1, mRNA [NM_174914]	chr5:36035667-36035608	hs|5p13.2
2.00294	-2.00294	-1.00212	down	LINGO1	leucine rich repeat and Ig domain containing 1	Homo sapiens leucine rich repeat and Ig domain containing 1 (LINGO1), transcript variant 5, mRNA [NM_001301191]	chr15:77906484-77906425	hs|15q24.3
2.00202	2.00202	1.00146	up	C6orf58	chromosome 6 open reading frame 58	Homo sapiens chromosome 6 open reading frame 58 (C6orf58), mRNA [NM_001010905]	chr6:127911300-127911359	hs|6q22.33
2.0005	2.0005	1.00036	up	MT1HL1	metallothionein 1H-like 1	Homo sapiens metallothionein 1H-like 1 (MT1HL1), mRNA [NM_001276687]	chr1:237167614-237167555	hs|1q43
2.00033	-2.00033	-1.00024	down	LINC01204	long intergenic non-protein coding RNA 1204	Homo sapiens long intergenic non-protein coding RNA 1204 (LINC01204), transcript variant 2, long non-coding RNA [NR_104645]	chrX:45381389-45381448	hs|Xp11.3
2.00002	-2.00002	-1.00001	down	lnc-AC091435.2-1	lnc-AC091435.2-1:2	LNCipedia lincRNA (lnc-AC091435.2-1), lincRNA [lnc-AC091435.2-1:2]	chr5:38792611-38792670	hs|5p13.1
1.99797	1.99797	0.998538	up	PLD5	phospholipase D family, member 5	Homo sapiens phospholipase D family, member 5 (PLD5), transcript variant 1, mRNA [NM_152666]	chr1:242252958-242252899	hs|1q43
1.99679	-1.99679	-0.997684	down	COL12A1	collagen, type XII, alpha 1	Homo sapiens collagen, type XII, alpha 1 (COL12A1), transcript variant long, mRNA [NM_004370]	chr6:75794348-75794289	hs|6q13
1.99627	-1.99627	-0.997307	down	COL17A1	collagen, type XVII, alpha 1	Homo sapiens collagen, type XVII, alpha 1 (COL17A1), mRNA [NM_000494]	chr10:105791142-105791083	hs|10q24.33
1.99404	-1.99404	-0.995695	down	PSME4	proteasome (prosome, macropain) activator subunit 4	proteasome (prosome, macropain) activator subunit 4 [Source:HGNC Symbol;Acc:HGNC:20635] [ENST00000488687]	chr2:54093242-54093183	hs|2p16.2
1.99343	1.99343	0.995256	up	RBM47	RNA binding motif protein 47	Homo sapiens RNA binding motif protein 47 (RBM47), transcript variant 2, mRNA [NM_019027]	chr4:40428153-40428094	hs|4p14
1.9933	1.9933	0.995162	up	MS4A4A	membrane-spanning 4-domains, subfamily A, member 4A	Homo sapiens membrane-spanning 4-domains, subfamily A, member 4A (MS4A4A), transcript variant 2, mRNA [NM_024021]	chr11:60075655-60075714	hs|11q12.2
1.9924	-1.9924	-0.994506	down	HRCT1	histidine rich carboxyl terminus 1	Homo sapiens histidine rich carboxyl terminus 1 (HRCT1), mRNA [NM_001039792]	chr9:35906792-35906851	hs|9p13.3
1.99199	-1.99199	-0.994209	down	TRPC4	transient receptor potential cation channel, subfamily C, member 4	Homo sapiens transient receptor potential cation channel, subfamily C, member 4 (TRPC4), transcript variant alpha, mRNA [NM_016179]	chr13:38211126-38211067	hs|13q13.3
1.99166	-1.99166	-0.993975	down	SCNN1A	sodium channel, non voltage gated 1 alpha subunit	Homo sapiens sodium channel, non voltage gated 1 alpha subunit (SCNN1A), transcript variant 1, mRNA [NM_001038]	chr12:6456735-6456676	hs|12p13.31
1.99164	-1.99164	-0.993954	down	SPINT2	serine peptidase inhibitor, Kunitz type, 2	Homo sapiens serine peptidase inhibitor, Kunitz type, 2 (SPINT2), transcript variant a, mRNA [NM_021102]	chr19:38782859-38782918	hs|19q13.2
1.99158	-1.99158	-0.993916	down	SAA4	serum amyloid A4, constitutive	Homo sapiens serum amyloid A4, constitutive (SAA4), mRNA [NM_006512]	chr11:18254043-18253984	hs|11p15.1
1.99149	-1.99149	-0.993848	down	B3GALT4	UDP-Gal:betaGlcNAc beta 1,3-galactosyltransferase, polypeptide 4	Homo sapiens UDP-Gal:betaGlcNAc beta 1,3-galactosyltransferase, polypeptide 4 (B3GALT4), mRNA [NM_003782]	chr6:33246543-33246603	hs|6p21.32
1.99142	-1.99142	-0.993795	down	lnc-EXD2-1	lnc-EXD2-1:2	Q21RF1_9BURK (Q21RF1) Biotin--acetyl-CoA-carboxylase ligase, partial (6%) [THC2728144]	chr14:69448206-69448265	hs|14q24.1
1.99115	1.99115	0.993599	up	FAM47E	family with sequence similarity 47, member E	Homo sapiens family with sequence similarity 47, member E (FAM47E), transcript variant 2, mRNA [NM_001242936]	chr4:77204817-77204876	hs|4q21.1
1.99111	-1.99111	-0.993572	down	ATP8B3	ATPase, aminophospholipid transporter, class I, type 8B, member 3	Homo sapiens ATPase, aminophospholipid transporter, class I, type 8B, member 3 (ATP8B3), transcript variant 1, mRNA [NM_138813]	chr19:1800003-1797004	hs|19p13.3
1.99073	-1.99073	-0.993296	down	FOXS1	forkhead box S1	Homo sapiens forkhead box S1 (FOXS1), mRNA [NM_004118]	chr20:30432163-30432104	hs|20q11.21
1.99064	1.99064	0.99323	up	PTHLH	parathyroid hormone-like hormone	Homo sapiens parathyroid hormone-like hormone (PTHLH), transcript variant 1, mRNA [NM_198965]	chr12:28116401-28116342	hs|12p11.22
1.98999	-1.98999	-0.992761	down	TEC	tec protein tyrosine kinase	Homo sapiens tec protein tyrosine kinase (TEC), mRNA [NM_003215]	chr4:48138569-48138510	hs|4p12
1.98926	-1.98926	-0.992229	down	IL16	interleukin 16	Homo sapiens interleukin 16 (IL16), transcript variant 2, mRNA [NM_172217]	chr15:81604940-81604999	hs|15q25.1
1.98832	-1.98832	-0.99155	down	PDE5A	phosphodiesterase 5A, cGMP-specific	Homo sapiens phosphodiesterase 5A, cGMP-specific (PDE5A), transcript variant 1, mRNA [NM_001083]	chr4:120415615-120415556	hs|4q26
1.98762	-1.98762	-0.991041	down	LOC728114	uncharacterized LOC728114	PREDICTED: Homo sapiens uncharacterized LOC728114 (LOC728114), misc_RNA [XR_245977]	chr12:48413644-48413585	hs|12q13.11
1.9875	-1.9875	-0.990955	down	SOD3	superoxide dismutase 3, extracellular	Homo sapiens superoxide dismutase 3, extracellular (SOD3), mRNA [NM_003102]	chr4:24802400-24802459	hs|4p15.2
1.98749	1.98749	0.990947	up	SPATA6L	spermatogenesis associated 6-like	spermatogenesis associated 6-like [Source:HGNC Symbol;Acc:HGNC:25472] [ENST00000471669]	chr9:4646358-4646299	hs|9p24.1
1.98686	1.98686	0.990491	up	BFSP2	beaded filament structural protein 2, phakinin	Homo sapiens beaded filament structural protein 2, phakinin (BFSP2), mRNA [NM_003571]	chr3:133193941-133194001	hs|3q22.1
1.98676	1.98676	0.99042	up	STRA6	stimulated by retinoic acid 6	Homo sapiens stimulated by retinoic acid 6 (STRA6), transcript variant 5, mRNA [NM_001142620]	chr15:74486784-74486725	hs|15q24.1
1.98573	-1.98573	-0.989668	down	PER3	period circadian clock 3	Homo sapiens period circadian clock 3 (PER3), transcript variant 4, mRNA [NM_016831]	chr1:7904641-7904700	hs|1p36.23
1.98529	1.98529	0.989349	up	ASB4	ankyrin repeat and SOCS box containing 4	Homo sapiens ankyrin repeat and SOCS box containing 4 (ASB4), transcript variant 1, mRNA [NM_016116]	chr7:95169397-95169456	hs|7q21.3
1.98522	-1.98522	-0.989302	down	HCFC1R1	host cell factor C1 regulator 1 (XPO1 dependent)	Homo sapiens host cell factor C1 regulator 1 (XPO1 dependent) (HCFC1R1), transcript variant 1, mRNA [NM_017885]	chr16:3072685-3072626	hs|16p13.3
1.98511	-1.98511	-0.989217	down	CCDC153	coiled-coil domain containing 153	Homo sapiens coiled-coil domain containing 153 (CCDC153), mRNA [NM_001145018]	chr11:119061446-119061130	hs|11q23.3
1.98501	-1.98501	-0.989147	down	KIAA1456	KIAA1456	Homo sapiens KIAA1456 (KIAA1456), transcript variant 1, mRNA [NM_020844]	chr8:12887037-12887096	hs|8p22
1.98483	-1.98483	-0.989018	down	LOC100506127	putative uncharacterized protein FLJ37770-like	Homo sapiens putative uncharacterized protein FLJ37770-like (LOC100506127), mRNA [NM_001282456]	chr11:76118264-76118323	hs|11q13.5
1.98444	-1.98444	-0.988735	down	LSAMP	limbic system-associated membrane protein	Homo sapiens limbic system-associated membrane protein (LSAMP), mRNA [NM_002338]	chr3:115571342-115561379	hs|3q13.31
1.9844	-1.9844	-0.988704	down	UBE2J2	ubiquitin-conjugating enzyme E2, J2	Homo sapiens ubiquitin-conjugating enzyme E2, J2 (UBE2J2), transcript variant 3, mRNA [NM_194458]	chr1:1190050-1189991	hs|1p36.33
1.98429	-1.98429	-0.988623	down	CABYR	calcium binding tyrosine-(Y)-phosphorylation regulated	Homo sapiens calcium binding tyrosine-(Y)-phosphorylation regulated (CABYR), transcript variant 1, mRNA [NM_012189]	chr18:21736708-21736767	hs|18q11.2
1.98381	-1.98381	-0.988276	down	NR3C2	nuclear receptor subfamily 3, group C, member 2	Homo sapiens nuclear receptor subfamily 3, group C, member 2 (NR3C2), transcript variant 1, mRNA [NM_000901]	chr4:149000423-149000364	hs|4q31.23
1.98359	-1.98359	-0.988114	down	CFAP43	cilia and flagella associated protein 43	Homo sapiens cilia and flagella associated protein 43 (CFAP43), mRNA [NM_025145]	chr10:105889846-105889787	hs|10q25.1
1.98358	-1.98358	-0.988108	down	CCDC148	coiled-coil domain containing 148	Homo sapiens coiled-coil domain containing 148 (CCDC148), transcript variant 1, mRNA [NM_138803]	chr2:159028665-159028606	hs|2q24.1
1.98332	1.98332	0.987918	up	GUCY1B2	guanylate cyclase 1, soluble, beta 2 (pseudogene)	guanylate cyclase 1, soluble, beta 2 (pseudogene) [Source:HGNC Symbol;Acc:HGNC:4686] [ENST00000389600]	chr13:51589613-51589554	hs|13q14.3
1.98305	1.98305	0.987724	up	TREML2	triggering receptor expressed on myeloid cells-like 2	Homo sapiens triggering receptor expressed on myeloid cells-like 2 (TREML2), mRNA [NM_024807]	chr6:41158552-41158493	hs|6p21.1
1.98215	-1.98215	-0.987063	down	RPA1	replication protein A1, 70kDa	Homo sapiens replication protein A1, 70kDa (RPA1), mRNA [NM_002945]	chr17:1802714-1802773	hs|17p13.3
1.9809	-1.9809	-0.986156	down	AMOT	angiomotin	Homo sapiens angiomotin (AMOT), transcript variant 2, mRNA [NM_133265]	chrX:112018573-112018514	hs|Xq23
1.98079	-1.98079	-0.986075	down	MDK	midkine (neurite growth-promoting factor 2)	Homo sapiens midkine (neurite growth-promoting factor 2) (MDK), transcript variant 1, mRNA [NM_001012334]	chr11:46405231-46405290	hs|11p11.2
1.98055	-1.98055	-0.985903	down	LOC101929460	uncharacterized LOC101929460	PREDICTED: Homo sapiens uncharacterized LOC101929460 (LOC101929460), ncRNA [XR_245641]	chr6:169434862-169434803	hs|6q27
1.98039	1.98039	0.985781	up	STC1	stanniocalcin 1	Homo sapiens stanniocalcin 1 (STC1), mRNA [NM_003155]	chr8:23700177-23700118	hs|8p21.2
1.98028	-1.98028	-0.985705	down	RAPGEF3	Rap guanine nucleotide exchange factor (GEF) 3	Homo sapiens Rap guanine nucleotide exchange factor (GEF) 3 (RAPGEF3), transcript variant 2, mRNA [NM_006105]	chr12:48132927-48132480	hs|12q13.11
1.98022	-1.98022	-0.985658	down	BARX1	BARX homeobox 1	Homo sapiens BARX homeobox 1 (BARX1), mRNA [NM_021570]	chr9:96714346-96714287	hs|9q22.32
1.98014	-1.98014	-0.985601	down	LOC101929378	uncharacterized LOC101929378	Homo sapiens uncharacterized LOC101929378 (LOC101929378), transcript variant 1, long non-coding RNA [NR_110250]	chr2:156878348-156878289	hs|2q24.1
1.97971	-1.97971	-0.985291	down	TGFB3	transforming growth factor, beta 3	Homo sapiens transforming growth factor, beta 3 (TGFB3), mRNA [NM_003239]	chr14:76424963-76424904	hs|14q24.3
1.97949	1.97949	0.985128	up	FTH1	ferritin, heavy polypeptide 1	Homo sapiens ferritin, heavy polypeptide 1 (FTH1), mRNA [NM_002032]	chr11:61732352-61732293	hs|11q12.3
1.97947	-1.97947	-0.985113	down	LEF1	lymphoid enhancer-binding factor 1	Homo sapiens lymphoid enhancer-binding factor 1 (LEF1), transcript variant 1, mRNA [NM_016269]	chr4:108968805-108968746	hs|4q25
1.9777	-1.9777	-0.983825	down	ARHGEF10	Rho guanine nucleotide exchange factor (GEF) 10	Rho guanine nucleotide exchange factor (GEF) 10 [Source:HGNC Symbol;Acc:HGNC:14103] [ENST00000398560]	chr8:1851609-1851668	hs|8p23.3
1.97754	-1.97754	-0.983709	down	LOC100131508	PRO2122	Homo sapiens clone FLB7925 PRO2122 mRNA, complete cds. [AF130064]	chr6:82262366-82262307	hs|6q14.1
1.97751	1.97751	0.983686	up	MAMDC2	MAM domain containing 2	Homo sapiens MAM domain containing 2 (MAMDC2), transcript variant 1, mRNA [NM_153267]	chr9:72833499-72840711	hs|9q21.12
1.97698	1.97698	0.983295	up	LOC101927769	uncharacterized LOC101927769	Homo sapiens uncharacterized LOC101927769 (LOC101927769), long non-coding RNA [NR_110117]	chr7:20350813-20350872	hs|7p21.1
1.97695	-1.97695	-0.983276	down	ZNF548	zinc finger protein 548	Homo sapiens zinc finger protein 548 (ZNF548), transcript variant 1, mRNA [NM_001172773]	chr19:57912622-57912681	hs|19q13.43
1.9764	1.9764	0.982877	up	NTNG1	netrin G1	netrin G1 [Source:HGNC Symbol;Acc:HGNC:23319] [ENST00000294649]	chr1:107952731-107952790	hs|1p13.3
1.97529	-1.97529	-0.982067	down	ANO1	anoctamin 1, calcium activated chloride channel	Homo sapiens anoctamin 1, calcium activated chloride channel (ANO1), transcript variant 1, mRNA [NM_018043]	chr11:70035233-70035292	hs|11q13.3
1.9748	-1.9748	-0.981709	down	NOD1	nucleotide-binding oligomerization domain containing 1	Homo sapiens nucleotide-binding oligomerization domain containing 1 (NOD1), mRNA [NM_006092]	chr7:30465046-30464987	hs|7p14.3
1.9744	-1.9744	-0.981416	down	EPHA3	EPH receptor A3	Homo sapiens EPH receptor A3 (EPHA3), transcript variant 2, mRNA [NM_182644]	chr3:89449087-89449146	hs|3p11.1
1.97431	1.97431	0.981349	up	OR5K1	olfactory receptor, family 5, subfamily K, member 1	Homo sapiens olfactory receptor, family 5, subfamily K, member 1 (OR5K1), mRNA [NM_001004736]	chr3:98189197-98189256	hs|3q11.2
1.97332	-1.97332	-0.980627	down	JPH3	junctophilin 3	Homo sapiens junctophilin 3 (JPH3), transcript variant 1, mRNA [NM_020655]	chr16:87731363-87731422	hs|16q24.2
1.97026	-1.97026	-0.978384	down	BRD8	bromodomain containing 8	Homo sapiens bromodomain containing 8 (BRD8), transcript variant 2, mRNA [NM_139199]	chr5:137475549-137475490	hs|5q31.2
1.97015	1.97015	0.978308	up	CHAC1	ChaC glutathione-specific gamma-glutamylcyclotransferase 1	Homo sapiens ChaC glutathione-specific gamma-glutamylcyclotransferase 1 (CHAC1), transcript variant 1, mRNA [NM_024111]	chr15:41247814-41247873	hs|15q15.1
1.96969	1.96969	0.977971	up	LOC102724824	uncharacterized LOC102724824	PREDICTED: Homo sapiens uncharacterized LOC102724824 (LOC102724824), transcript variant X1, ncRNA [XR_424477]	chr14:24088771-24088830	hs|14q11.2
1.96935	-1.96935	-0.977717	down	LOC101929484	uncharacterized LOC101929484	PREDICTED: Homo sapiens uncharacterized LOC101929484 (LOC101929484), ncRNA [XR_245642]	chr6:169562796-169558551	hs|6q27
1.96934	-1.96934	-0.977711	down	ZNF282	zinc finger protein 282	zinc finger protein 282 [Source:HGNC Symbol;Acc:HGNC:13076] [ENST00000610704]	chr7:148922180-148922239	hs|7q36.1
1.96884	-1.96884	-0.977346	down	FAM160A1	family with sequence similarity 160, member A1	Homo sapiens family with sequence similarity 160, member A1 (FAM160A1), mRNA [NM_001109977]	chr4:152577926-152577985	hs|4q31.3
1.96879	-1.96879	-0.97731	down	MMAB	methylmalonic aciduria (cobalamin deficiency) cblB type	Homo sapiens methylmalonic aciduria (cobalamin deficiency) cblB type (MMAB), transcript variant 1, mRNA [NM_052845]	chr12:109991620-109991561	hs|12q24.11
1.96625	1.96625	0.97545	up	E2F7	E2F transcription factor 7	Homo sapiens E2F transcription factor 7 (E2F7), mRNA [NM_203394]	chr12:77417635-77417576	hs|12q21.2
1.96501	-1.96501	-0.974538	down	GPM6B	glycoprotein M6B	Homo sapiens glycoprotein M6B (GPM6B), transcript variant 1, mRNA [NM_001001995]	chrX:13789216-13789157	hs|Xp22.2
1.96459	1.96459	0.974229	up	PLBD1-AS1	PLBD1 antisense RNA 1	Homo sapiens PLBD1 antisense RNA 1 (PLBD1-AS1), long non-coding RNA [NR_120465]	chr12:14772173-14772232	hs|12p13.1
1.96439	-1.96439	-0.97408	down	SCRG1	stimulator of chondrogenesis 1	Homo sapiens stimulator of chondrogenesis 1 (SCRG1), mRNA [NM_007281]	chr4:174309518-174309459	hs|4q34.1
1.96311	-1.96311	-0.973141	down	PIK3C2B	phosphatidylinositol-4-phosphate 3-kinase, catalytic subunit type 2 beta	Homo sapiens phosphatidylinositol-4-phosphate 3-kinase, catalytic subunit type 2 beta (PIK3C2B), mRNA [NM_002646]	chr1:204391950-204391891	hs|1q32.1
1.96295	-1.96295	-0.973024	down	ITGB2	integrin, beta 2 (complement component 3 receptor 3 and 4 subunit)	integrin, beta 2 (complement component 3 receptor 3 and 4 subunit) [Source:HGNC Symbol;Acc:HGNC:6155] [ENST00000610622]	chr21:46326865-46321625	hs|21q22.3
1.96287	-1.96287	-0.972961	down	CROCC	ciliary rootlet coiled-coil, rootletin	Homo sapiens ciliary rootlet coiled-coil, rootletin (CROCC), mRNA [NM_014675]	chr1:17299343-17299402	hs|1p36.13
1.96275	1.96275	0.972876	up	XKR4	XK, Kell blood group complex subunit-related family, member 4	XK, Kell blood group complex subunit-related family, member 4 [Source:HGNC Symbol;Acc:HGNC:29394] [ENST00000327381]	chr8:56454444-56454503	hs|8q12.1
1.96262	1.96262	0.972778	up	SEMG2	semenogelin II	Homo sapiens semenogelin II (SEMG2), mRNA [NM_003008]	chr20:43851385-43851444	hs|20q13.12
1.96057	1.96057	0.971275	up	NKX2-8	NK2 homeobox 8	Homo sapiens NK2 homeobox 8 (NKX2-8), mRNA [NM_014360]	chr14:37049276-37049217	hs|14q13.3
1.96051	-1.96051	-0.971227	down	ZCCHC6	zinc finger, CCHC domain containing 6	zinc finger, CCHC domain containing 6 [Source:HGNC Symbol;Acc:HGNC:25817] [ENST00000375947]	chr9:88959844-88959785	hs|9q21.33
1.96038	-1.96038	-0.971136	down	NUP133	nucleoporin 133kDa	nucleoporin 133kDa [Source:HGNC Symbol;Acc:HGNC:18016] [ENST00000261396]	chr1:229576105-229576046	hs|1q42.13
1.95873	1.95873	0.969919	up	OR4A47	olfactory receptor, family 4, subfamily A, member 47	Homo sapiens olfactory receptor, family 4, subfamily A, member 47 (OR4A47), mRNA [NM_001005512]	chr11:48511215-48511274	hs|11p11.2
1.95772	-1.95772	-0.969172	down	DPY19L4	dpy-19-like 4 (C. elegans)	Homo sapiens dpy-19-like 4 (C. elegans) (DPY19L4), mRNA [NM_181787]	chr8:95805979-95806038	hs|8q22.1
1.95749	-1.95749	-0.969007	down	ADAMTS7	ADAM metallopeptidase with thrombospondin type 1 motif, 7	Homo sapiens ADAM metallopeptidase with thrombospondin type 1 motif, 7 (ADAMTS7), mRNA [NM_014272]	chr15:79064069-79064010	hs|15q25.1
1.95652	-1.95652	-0.968289	down	LINC01560	long intergenic non-protein coding RNA 1560	Homo sapiens long intergenic non-protein coding RNA 1560 (LINC01560), long non-coding RNA [NR_126059]	chrX:47343219-47343278	hs|Xp11.23
1.95644	-1.95644	-0.968228	down	HTR2B	5-hydroxytryptamine (serotonin) receptor 2B, G protein-coupled	Homo sapiens 5-hydroxytryptamine (serotonin) receptor 2B, G protein-coupled (HTR2B), mRNA [NM_000867]	chr2:231973300-231973241	hs|2q37.1
1.95633	-1.95633	-0.968153	down	ABLIM1	actin binding LIM protein 1	Homo sapiens actin binding LIM protein 1 (ABLIM1), transcript variant 3, mRNA [NM_001003408]	chr10:116196035-116195976	hs|10q25.3
1.95532	1.95532	0.967403	up	KCNG1	potassium channel, voltage gated modifier subfamily G, member 1	Homo sapiens potassium channel, voltage gated modifier subfamily G, member 1 (KCNG1), mRNA [NM_002237]	chr20:49620322-49620263	hs|20q13.13
1.95517	-1.95517	-0.967294	down	DMD	dystrophin	Homo sapiens dystrophin (DMD), transcript variant Dp140b, mRNA [NM_004021]	chrX:31152279-31152220	hs|Xp21.2
1.95437	1.95437	0.966701	up	SPINK1	serine peptidase inhibitor, Kazal type 1	Homo sapiens serine peptidase inhibitor, Kazal type 1 (SPINK1), mRNA [NM_003122]	chr5:147207585-147204211	hs|5q32
1.95378	-1.95378	-0.966269	down	HIGD1C	HIG1 hypoxia inducible domain family, member 1C	Homo sapiens HIG1 hypoxia inducible domain family, member 1C (HIGD1C), mRNA [NM_001109619]	chr12:51364230-51364289	hs|12q13.12
1.9536	1.9536	0.966138	up	NR4A2	nuclear receptor subfamily 4, group A, member 2	Homo sapiens nuclear receptor subfamily 4, group A, member 2 (NR4A2), mRNA [NM_006186]	chr2:157181786-157181727	hs|2q24.1
1.95306	1.95306	0.965736	up	ZNF705B	zinc finger protein 705B	Homo sapiens zinc finger protein 705B (ZNF705B), mRNA [NM_001193630]	chr8:7809455-7809514	hs|8p23.1
1.95272	-1.95272	-0.965487	down	LOC728715	ovostatin homolog 2-like	Homo sapiens mRNA; cDNA DKFZp686A1124 (from clone DKFZp686A1124). [BX647938]	chr12:9714018-9714077	hs|12p13.31
1.95128	1.95128	0.964419	up	MT1E	metallothionein 1E	Homo sapiens metallothionein 1E (MT1E), mRNA [NM_175617]	chr16:56660853-56660912	hs|16q12.2
1.95123	1.95123	0.964387	up	KIAA1244	KIAA1244	Homo sapiens KIAA1244 (KIAA1244), mRNA [NM_020340]	chr6:138657434-138657493	hs|6q23.3
1.95117	-1.95117	-0.964336	down	LOC100129380	uncharacterized LOC100129380	Homo sapiens cDNA FLJ43532 fis, clone PLACE7001022. [AK125520]	chr12:125625788-125625847	hs|12q24.31
1.95072	1.95072	0.964008	up	PHGDH	phosphoglycerate dehydrogenase	Homo sapiens phosphoglycerate dehydrogenase (PHGDH), mRNA [NM_006623]	chr1:120285529-120285588	hs|1p12
1.95045	-1.95045	-0.963809	down	S100B	S100 calcium binding protein B	Homo sapiens S100 calcium binding protein B (S100B), mRNA [NM_006272]	chr21:48019158-48019099	hs|21q22.3
1.9498	1.9498	0.963328	up	FTH1	ferritin, heavy polypeptide 1	Homo sapiens ferritin, heavy polypeptide 1 (FTH1), mRNA [NM_002032]	chr11:61732130-61732071	hs|11q12.3
1.94826	-1.94826	-0.962185	down	ARSD	arylsulfatase D	arylsulfatase D [Source:HGNC Symbol;Acc:HGNC:717] [ENST00000481340]	chrX:2832639-2832580	hs|Xp22.33
1.94815	-1.94815	-0.962106	down	ATP10A	ATPase, class V, type 10A	Homo sapiens ATPase, class V, type 10A (ATP10A), mRNA [NM_024490]	chr15:25923934-25923875	hs|15q12
1.94782	-1.94782	-0.961859	down	C19orf40	chromosome 19 open reading frame 40	Homo sapiens chromosome 19 open reading frame 40 (C19orf40), transcript variant 1, mRNA [NM_152266]	chr19:33464453-33465009	hs|19q13.11
1.94745	-1.94745	-0.961587	down	PPP1R36	protein phosphatase 1, regulatory subunit 36	Homo sapiens protein phosphatase 1, regulatory subunit 36 (PPP1R36), mRNA [NM_172365]	chr14:65054910-65054969	hs|14q23.3
1.94692	-1.94692	-0.961192	down	DCLK2	doublecortin-like kinase 2	Homo sapiens doublecortin-like kinase 2 (DCLK2), transcript variant 1, mRNA [NM_001040260]	chr4:151178051-151178110	hs|4q31.3
1.94643	-1.94643	-0.960834	down	DACT1	dishevelled-binding antagonist of beta-catenin 1	Homo sapiens dishevelled-binding antagonist of beta-catenin 1 (DACT1), transcript variant 1, mRNA [NM_016651]	chr14:59114713-59114772	hs|14q23.1
1.9452	1.9452	0.959918	up	TRPA1	transient receptor potential cation channel, subfamily A, member 1	Homo sapiens transient receptor potential cation channel, subfamily A, member 1 (TRPA1), mRNA [NM_007332]	chr8:72933685-72933626	hs|8q13.3
1.94459	1.94459	0.959463	up	PPP1R9A	protein phosphatase 1, regulatory subunit 9A	Homo sapiens protein phosphatase 1, regulatory subunit 9A (PPP1R9A), transcript variant 4, mRNA [NM_017650]	chr7:94925547-94925606	hs|7q21.3
1.94446	-1.94446	-0.959371	down	GUCA1B	guanylate cyclase activator 1B (retina)	Homo sapiens guanylate cyclase activator 1B (retina) (GUCA1B), mRNA [NM_002098]	chr6:42151260-42151201	hs|6p21.1
1.94366	-1.94366	-0.958779	down	NOX4	NADPH oxidase 4	Homo sapiens NADPH oxidase 4 (NOX4), transcript variant NOX4B, mRNA [NM_001143836]	chr11:89223692-89223633	hs|11q14.3
1.94256	-1.94256	-0.95796	down	CCDC85C	coiled-coil domain containing 85C	Homo sapiens coiled-coil domain containing 85C (CCDC85C), mRNA [NM_001144995]	chr14:99978443-99978384	hs|14q32.2
1.94236	-1.94236	-0.957808	down	C20orf197	chromosome 20 open reading frame 197	Homo sapiens chromosome 20 open reading frame 197 (C20orf197), transcript variant 1, mRNA [NM_173644]	chr20:58647278-58647337	hs|20q13.33
1.94201	-1.94201	-0.957547	down	ULK2	unc-51 like autophagy activating kinase 2	Homo sapiens unc-51 like autophagy activating kinase 2 (ULK2), transcript variant 1, mRNA [NM_014683]	chr17:19674203-19674144	hs|17p11.2
1.9402	-1.9402	-0.956207	down	ARHGAP28	Rho GTPase activating protein 28	Homo sapiens Rho GTPase activating protein 28 (ARHGAP28), mRNA [NM_001010000]	chr18:6890038-6890441	hs|18p11.31
1.93977	-1.93977	-0.955885	down	MYO1H	myosin IH	Homo sapiens myosin IH (MYO1H), mRNA [NM_001101421]	chr12:109879473-109880040	hs|12q24.11
1.93967	-1.93967	-0.95581	down	PKDCC	protein kinase domain containing, cytoplasmic	Homo sapiens protein kinase domain containing, cytoplasmic (PKDCC), mRNA [NM_138370]	chr2:42285006-42285065	hs|2p21
1.93862	1.93862	0.955032	up	SOX5	SRY (sex determining region Y)-box 5	Homo sapiens SRY (sex determining region Y)-box 5 (SOX5), transcript variant 2, mRNA [NM_152989]	chr12:23685353-23685294	hs|12p12.1
1.93809	-1.93809	-0.954638	down	CXCL12	chemokine (C-X-C motif) ligand 12	Homo sapiens chemokine (C-X-C motif) ligand 12 (CXCL12), transcript variant 3, mRNA [NM_001033886]	chr10:44871424-44871365	hs|10q11.21
1.93749	-1.93749	-0.954188	down	GAB4	GRB2-associated binding protein family, member 4	Homo sapiens GRB2-associated binding protein family, member 4 (GAB4), mRNA [NM_001037814]	chr22:17443157-17443098	hs|22q11.1
1.93739	-1.93739	-0.954113	down	DNAH12	dynein, axonemal, heavy chain 12	Homo sapiens dynein, axonemal, heavy chain 12 (DNAH12), transcript variant 2, mRNA [NM_198564]	chr3:57483829-57483770	hs|3p14.3
1.93718	-1.93718	-0.953962	down	LINC00910	long intergenic non-protein coding RNA 910	long intergenic non-protein coding RNA 910 [Source:HGNC Symbol;Acc:HGNC:44361] [ENST00000586231]	chr17:41463401-41463342	hs|17q21.31
1.93708	1.93708	0.95388	up	OR8H1	olfactory receptor, family 8, subfamily H, member 1	Homo sapiens olfactory receptor, family 8, subfamily H, member 1 (OR8H1), mRNA [NM_001005199]	chr11:56057842-56057783	hs|11q12.1
1.93693	-1.93693	-0.953775	down	ASPSCR1	alveolar soft part sarcoma chromosome region, candidate 1	alveolar soft part sarcoma chromosome region, candidate 1 [Source:HGNC Symbol;Acc:HGNC:13825] [ENST00000583693]	chr17:79972217-79972276	hs|17q25.3
1.93598	1.93598	0.953064	up	ACPP	acid phosphatase, prostate	Homo sapiens acid phosphatase, prostate (ACPP), transcript variant 1, mRNA [NM_001099]	chr3:132068798-132071574	hs|3q22.1
1.93548	-1.93548	-0.952688	down	EFCAB9	EF-hand calcium binding domain 9	Homo sapiens EF-hand calcium binding domain 9 (EFCAB9), mRNA [NM_001171183]	chr5:171630241-171630300	hs|5q35.1
1.93544	1.93544	0.952658	up	LRRC55	leucine rich repeat containing 55	Homo sapiens leucine rich repeat containing 55 (LRRC55), mRNA [NM_001005210]	chr11:56957519-56957578	hs|11q12.1
1.93521	-1.93521	-0.95249	down	C5AR2	complement component 5a receptor 2	Homo sapiens complement component 5a receptor 2 (C5AR2), transcript variant 1, mRNA [NM_001271749]	chr19:47845212-47845271	hs|19q13.32
1.93513	-1.93513	-0.952431	down	TMEM220	transmembrane protein 220	Homo sapiens transmembrane protein 220 (TMEM220), mRNA [NM_001004313]	chr17:10616718-10616659	hs|17p13.1
1.93467	1.93467	0.952088	up	SULT4A1	sulfotransferase family 4A, member 1	Homo sapiens sulfotransferase family 4A, member 1 (SULT4A1), mRNA [NM_014351]	chr22:44220448-44220389	hs|22q13.31
1.93387	-1.93387	-0.951491	down	SUGCT	succinyl-CoA:glutarate-CoA transferase	Homo sapiens succinyl-CoA:glutarate-CoA transferase (SUGCT), transcript variant 1, mRNA [NM_001193311]	chr7:40900230-40900289	hs|7p14.1
1.93237	-1.93237	-0.950373	down	HAPLN1	hyaluronan and proteoglycan link protein 1	Homo sapiens hyaluronan and proteoglycan link protein 1 (HAPLN1), mRNA [NM_001884]	chr5:82937382-82937323	hs|5q14.3
1.93205	-1.93205	-0.950135	down	LOC100507195	uncharacterized LOC100507195	Homo sapiens uncharacterized LOC100507195 (LOC100507195), long non-coding RNA [NR_120458]	chr12:68825700-68825641	hs|12q15
1.93016	-1.93016	-0.948722	down	AGT	angiotensinogen (serpin peptidase inhibitor, clade A, member 8)	Homo sapiens angiotensinogen (serpin peptidase inhibitor, clade A, member 8) (AGT), mRNA [NM_000029]	chr1:230838590-230838531	hs|1q42.2
1.93006	1.93006	0.948646	up	FA2H	fatty acid 2-hydroxylase	Homo sapiens fatty acid 2-hydroxylase (FA2H), mRNA [NM_024306]	chr16:74747023-74746964	hs|16q23.1
1.9297	1.9297	0.948378	up	SIRPB1	signal-regulatory protein beta 1	signal-regulatory protein beta 1 [Source:HGNC Symbol;Acc:HGNC:15928] [ENST00000381596]	chr20:1586579-1586520	hs|20p13
1.92965	1.92965	0.948342	up	lnc-TMEM132B-2	lnc-TMEM132B-2:3	LNCipedia lincRNA (lnc-TMEM132B-2), lincRNA [lnc-TMEM132B-2:3]	chr12:126498022-126498081	hs|12q24.32
1.92866	-1.92866	-0.947599	down	PRSS12	protease, serine, 12 (neurotrypsin, motopsin)	Homo sapiens protease, serine, 12 (neurotrypsin, motopsin) (PRSS12), mRNA [NM_003619]	chr4:119203016-119202957	hs|4q26
1.92796	1.92796	0.947076	up	VTCN1	V-set domain containing T cell activation inhibitor 1	Homo sapiens V-set domain containing T cell activation inhibitor 1 (VTCN1), transcript variant 1, mRNA [NM_024626]	chr1:117686657-117686598	hs|1p13.1
1.92788	1.92788	0.947014	up	USH1G	Usher syndrome 1G (autosomal recessive)	Homo sapiens Usher syndrome 1G (autosomal recessive) (USH1G), transcript variant 1, mRNA [NM_173477]	chr17:72912235-72912176	hs|17q25.1
1.9277	1.9277	0.946877	up	DOT1L	DOT1-like histone H3K79 methyltransferase	PREDICTED: Homo sapiens DOT1-like histone H3K79 methyltransferase (DOT1L), transcript variant X2, mRNA [XM_005259660]	chr19:2228287-2228346	hs|19p13.3
1.92731	-1.92731	-0.946592	down	SLFN11	schlafen family member 11	Homo sapiens schlafen family member 11 (SLFN11), transcript variant 1, mRNA [NM_001104587]	chr17:33677430-33677371	hs|17q12
1.92727	-1.92727	-0.946556	down	ITFG1-AS1	ITFG1 antisense RNA 1	Homo sapiens ITFG1 antisense RNA 1 (ITFG1-AS1), transcript variant 1, long non-coding RNA [NR_110903]	chr16:47196599-47196658	hs|16q12.1
1.92657	1.92657	0.946035	up	CLGN	calmegin	Homo sapiens calmegin (CLGN), transcript variant 1, mRNA [NM_004362]	chr4:141310434-141310375	hs|4q31.1
1.92652	1.92652	0.945999	up	BRINP1	bone morphogenetic protein/retinoic acid inducible neural-specific 1	Homo sapiens deleted in bladder cancer 1, mRNA (cDNA clone IMAGE:4591607), complete cds. [BC021560]	chr9:121975997-121975938	hs|9q33.1
1.92584	-1.92584	-0.945491	down	GNB4	guanine nucleotide binding protein (G protein), beta polypeptide 4	Homo sapiens guanine nucleotide binding protein (G protein), beta polypeptide 4 (GNB4), mRNA [NM_021629]	chr3:179113988-179113929	hs|3q26.33
1.92458	1.92458	0.94454	up	SPINK6	serine peptidase inhibitor, Kazal type 6	Homo sapiens serine peptidase inhibitor, Kazal type 6 (SPINK6), transcript variant 1, mRNA [NM_205841]	chr5:147594478-147594537	hs|5q32
1.92434	1.92434	0.944361	up	LINC01060	long intergenic non-protein coding RNA 1060	long intergenic non-protein coding RNA 1060 [Source:HGNC Symbol;Acc:HGNC:49081] [ENST00000510832]	chr4:189459645-189459704	hs|4q35.2
1.92263	1.92263	0.943082	up	PLA2G4A	phospholipase A2, group IVA (cytosolic, calcium-dependent)	Homo sapiens phospholipase A2, group IVA (cytosolic, calcium-dependent) (PLA2G4A), mRNA [NM_024420]	chr1:186957652-186957711	hs|1q31.1
1.9225	-1.9225	-0.942983	down	MYCL	v-myc avian myelocytomatosis viral oncogene lung carcinoma derived homolog	Homo sapiens v-myc avian myelocytomatosis viral oncogene lung carcinoma derived homolog (MYCL), transcript variant 1, mRNA [NM_001033081]	chr1:40361179-40361120	hs|1p34.2
1.92242	1.92242	0.942927	up	CASP1	caspase 1, apoptosis-related cysteine peptidase	Homo sapiens caspase 1, apoptosis-related cysteine peptidase (CASP1), transcript variant alpha, mRNA [NM_033292]	chr11:104897602-104897058	hs|11q22.3
1.92237	-1.92237	-0.942887	down	ENTPD1	ectonucleoside triphosphate diphosphohydrolase 1	Homo sapiens ectonucleoside triphosphate diphosphohydrolase 1 (ENTPD1), transcript variant 1, mRNA [NM_001776]	chr10:97636883-97636942	hs|10q24.1
1.92224	1.92224	0.942787	up	LOC101927139	uncharacterized LOC101927139	Homo sapiens uncharacterized LOC101927139 (LOC101927139), long non-coding RNA [NR_123718]	chr1:66508267-66508208	hs|1p31.3
1.9221	1.9221	0.942682	up	LCE2A	late cornified envelope 2A	Homo sapiens late cornified envelope 2A (LCE2A), mRNA [NM_178428]	chr1:152671859-152671918	hs|1q21.3
1.92193	-1.92193	-0.942552	down	LOC101928858	uncharacterized LOC101928858	PREDICTED: Homo sapiens uncharacterized LOC101928858 (RP11-434D9.1), transcript variant X1, ncRNA [XR_249793]	chr5:67096587-67096646	hs|5q13.1
1.92164	1.92164	0.942336	up	SLC17A4	solute carrier family 17, member 4	Homo sapiens solute carrier family 17, member 4 (SLC17A4), transcript variant 1, mRNA [NM_005495]	chr6:25781343-25781402	hs|6p22.2
1.92102	-1.92102	-0.941874	down	GXYLT2	glucoside xylosyltransferase 2	Homo sapiens glucoside xylosyltransferase 2 (GXYLT2), mRNA [NM_001080393]	chr3:73016853-73024169	hs|3p13
1.92102	-1.92102	-0.941874	down	CYP27A1	cytochrome P450, family 27, subfamily A, polypeptide 1	Homo sapiens cytochrome P450, family 27, subfamily A, polypeptide 1 (CYP27A1), mRNA [NM_000784]	chr2:219679951-219680010	hs|2q35
1.92076	-1.92076	-0.94168	down	MMP23B	matrix metallopeptidase 23B	Homo sapiens matrix metallopeptidase 23B (MMP23B), mRNA [NM_006983]	chr1:1569668-1569846	hs|1p36.33
1.92062	-1.92062	-0.941575	down	FRY	furry homolog (Drosophila)	Homo sapiens furry homolog (Drosophila) (FRY), mRNA [NM_023037]	chr13:32828451-32828510	hs|13q13.1
1.92014	-1.92014	-0.941211	down	FGFR2	fibroblast growth factor receptor 2	Homo sapiens fibroblast growth factor receptor 2 (FGFR2), transcript variant 2, mRNA [NM_022970]	chr10:123243276-123243217	hs|10q26.13
1.91996	-1.91996	-0.941077	down	lnc-EXOSC6-2	lnc-EXOSC6-2:1	Homo sapiens cDNA FLJ38747 fis, clone KIDNE2012361. [AK096066]	chr16:70195779-70195720	hs|16q22.1
1.91904	1.91904	0.940385	up	RGS2	regulator of G-protein signaling 2	Homo sapiens regulator of G-protein signaling 2 (RGS2), mRNA [NM_002923]	chr1:192781051-192781110	hs|1q31.2
1.9186	1.9186	0.940053	up	SOBP	sine oculis binding protein homolog (Drosophila)	Homo sapiens sine oculis binding protein homolog (Drosophila) (SOBP), mRNA [NM_018013]	chr6:107982440-107982499	hs|6q21
1.9182	1.9182	0.939755	up	GZMA	granzyme A (granzyme 1, cytotoxic T-lymphocyte-associated serine esterase 3)	Homo sapiens granzyme A (granzyme 1, cytotoxic T-lymphocyte-associated serine esterase 3) (GZMA), mRNA [NM_006144]	chr5:54405998-54406057	hs|5q11.2
1.91811	-1.91811	-0.939685	down	lnc-MTA3-2	lnc-MTA3-2:1	LNCipedia lincRNA (lnc-MTA3-2), lincRNA [lnc-MTA3-2:1]	chr2:43055990-43180230	hs|2p21
1.91724	-1.91724	-0.939033	down	GPRC5B	G protein-coupled receptor, class C, group 5, member B	Homo sapiens G protein-coupled receptor, class C, group 5, member B (GPRC5B), mRNA [NM_016235]	chr16:19870688-19870629	hs|16p12.3
1.91697	-1.91697	-0.938829	down	FAM46C	family with sequence similarity 46, member C	Homo sapiens family with sequence similarity 46, member C (FAM46C), mRNA [NM_017709]	chr1:118170883-118170942	hs|1p12
1.91557	1.91557	0.937773	up	KIAA1211	KIAA1211	Homo sapiens KIAA1211 (KIAA1211), mRNA [NM_020722]	chr4:57196780-57196839	hs|4q12
1.91529	-1.91529	-0.937565	down	IGF2	insulin-like growth factor 2	Homo sapiens insulin-like growth factor 2 (IGF2), transcript variant 1, mRNA [NM_000612]	chr11:2154754-2154402	hs|11p15.5
1.91469	-1.91469	-0.937111	down	TXNIP	thioredoxin interacting protein	Homo sapiens thioredoxin interacting protein (TXNIP), mRNA [NM_006472]	chr1:145442447-145442506	hs|1q21.1
1.91409	1.91409	0.936659	up	CPA6	carboxypeptidase A6	Homo sapiens carboxypeptidase A6 (CPA6), mRNA [NM_020361]	chr8:68396957-68396078	hs|8q13.2
1.91288	-1.91288	-0.935749	down	UTS2	urotensin 2	Homo sapiens urotensin 2 (UTS2), transcript variant 1, mRNA [NM_021995]	chr1:7909705-7907889	hs|1p36.23
1.91263	-1.91263	-0.935559	down	SLC24A3	solute carrier family 24 (sodium/potassium/calcium exchanger), member 3	Homo sapiens solute carrier family 24 (sodium/potassium/calcium exchanger), member 3 (SLC24A3), mRNA [NM_020689]	chr20:19703459-19703518	hs|20p11.23
1.91245	1.91245	0.935419	up	CCL26	chemokine (C-C motif) ligand 26	Homo sapiens chemokine (C-C motif) ligand 26 (CCL26), mRNA [NM_006072]	chr7:75401219-75399061	hs|7q11.23
1.91231	-1.91231	-0.935313	down	LDHD	lactate dehydrogenase D	Homo sapiens lactate dehydrogenase D (LDHD), transcript variant 1, mRNA [NM_153486]	chr16:75145886-75145827	hs|16q23.1
1.91194	-1.91194	-0.935035	down	INADL	InaD-like (Drosophila)	Homo sapiens InaD-like (Drosophila) (INADL), mRNA [NM_176877]	chr1:62628634-62628693	hs|1p31.3
1.91187	-1.91187	-0.934984	down	SPRY1	sprouty homolog 1, antagonist of FGF signaling (Drosophila)	Homo sapiens sprouty homolog 1, antagonist of FGF signaling (Drosophila) (SPRY1), transcript variant 2, mRNA [NM_199327]	chr4:124324494-124324553	hs|4q28.1
1.91146	-1.91146	-0.934675	down	TMEM63A	transmembrane protein 63A	Homo sapiens transmembrane protein 63A (TMEM63A), mRNA [NM_014698]	chr1:226070098-226070039	hs|1q42.12
1.9113	-1.9113	-0.934557	down	LOC100505504	uncharacterized LOC100505504	PREDICTED: Homo sapiens uncharacterized LOC100505504 (LOC100505504), transcript variant X6, ncRNA [XR_428947]	chr11:66177459-66177518	hs|11q13.2
1.91108	1.91108	0.93439	up	FILIP1	filamin A interacting protein 1	Homo sapiens filamin A interacting protein 1 (FILIP1), transcript variant 4, mRNA [NM_001300866]	chr6:76022173-76022114	hs|6q14.1
1.911	-1.911	-0.934326	down	CMBL	carboxymethylenebutenolidase homolog (Pseudomonas)	Homo sapiens carboxymethylenebutenolidase homolog (Pseudomonas) (CMBL), mRNA [NM_138809]	chr5:10277813-10277754	hs|5p15.2
1.91085	-1.91085	-0.934215	down	FZD4	frizzled class receptor 4	Homo sapiens frizzled class receptor 4 (FZD4), mRNA [NM_012193]	chr11:86656859-86656800	hs|11q14.2
1.9105	-1.9105	-0.933951	down	SERPING1	serpin peptidase inhibitor, clade G (C1 inhibitor), member 1	Homo sapiens serpin peptidase inhibitor, clade G (C1 inhibitor), member 1 (SERPING1), transcript variant 1, mRNA [NM_000062]	chr11:57367781-57367840	hs|11q12.1
1.91046	-1.91046	-0.933918	down	DCN	decorin	Homo sapiens decorin (DCN), transcript variant A1, mRNA [NM_001920]	chr12:91539893-91539834	hs|12q21.33
1.91003	-1.91003	-0.933594	down	lnc-PRR11-1	lnc-PRR11-1:1	Homo sapiens cDNA clone IMAGE:3350145, **** WARNING: chimeric clone ****. [BC011742]	chr17:57184952-57195343	hs|17q22
1.90986	-1.90986	-0.93347	down	RASSF3	Ras association (RalGDS/AF-6) domain family member 3	Homo sapiens Ras association (RalGDS/AF-6) domain family member 3 (RASSF3), transcript variant 1, mRNA [NM_178169]	chr12:65082158-65082217	hs|12q14.2
1.90969	-1.90969	-0.933342	down	ARHGAP21	Rho GTPase activating protein 21	Rho GTPase activating protein 21 [Source:HGNC Symbol;Acc:HGNC:23725] [ENST00000476499]	chr10:24918773-24918714	hs|10p12.1
1.909	1.909	0.932814	up	TNFRSF13B	tumor necrosis factor receptor superfamily, member 13B	Homo sapiens tumor necrosis factor receptor superfamily, member 13B (TNFRSF13B), mRNA [NM_012452]	chr17:16852130-16852071	hs|17p11.2
1.90851	-1.90851	-0.932449	down	HOXD11	homeobox D11	Homo sapiens homeobox D11 (HOXD11), mRNA [NM_021192]	chr2:176973811-176973870	hs|2q31.1
1.90769	-1.90769	-0.931824	down	SERPINF1	serpin peptidase inhibitor, clade F (alpha-2 antiplasmin, pigment epithelium derived factor), member 1	Homo sapiens serpin peptidase inhibitor, clade F (alpha-2 antiplasmin, pigment epithelium derived factor), member 1 (SERPINF1), mRNA [NM_002615]	chr17:1680668-1680727	hs|17p13.3
1.90611	-1.90611	-0.930633	down	EML4	echinoderm microtubule associated protein like 4	echinoderm microtubule associated protein like 4 [Source:HGNC Symbol;Acc:HGNC:1316] [ENST00000318522]	chr2:42559572-42559631	hs|2p21
1.90571	1.90571	0.93033	up	LOC339622	uncharacterized LOC339622	Homo sapiens uncharacterized LOC339622 (LOC339622), long non-coding RNA [NR_046198]	chr21:26429973-26430032	hs|21q21.2
1.90541	-1.90541	-0.930099	down	RARB	retinoic acid receptor, beta	Homo sapiens retinoic acid receptor, beta (RARB), transcript variant 1, mRNA [NM_000965]	chr3:25638622-25638681	hs|3p24.2
1.90522	1.90522	0.929957	up	HTR7	5-hydroxytryptamine (serotonin) receptor 7, adenylate cyclase-coupled	Homo sapiens 5-hydroxytryptamine (serotonin) receptor 7, adenylate cyclase-coupled (HTR7), transcript variant d, mRNA [NM_019859]	chr10:92500843-92500784	hs|10q23.31
1.90478	-1.90478	-0.929628	down	MROH9	maestro heat-like repeat family member 9	Homo sapiens maestro heat-like repeat family member 9 (MROH9), transcript variant 2, mRNA [NM_025063]	chr1:170965725-170965784	hs|1q24.3
1.90472	1.90472	0.929577	up	ARSG	arylsulfatase G	Homo sapiens arylsulfatase G (ARSG), transcript variant 1, mRNA [NM_014960]	chr17:66416529-66416588	hs|17q24.2
1.90442	-1.90442	-0.929351	down	LINC00982	long intergenic non-protein coding RNA 982	Homo sapiens mRNA; cDNA DKFZp761G0122 (from clone DKFZp761G0122). [AL713743]	chr1:2977720-2977661	hs|1p36.32
1.90416	1.90416	0.929158	up	LINC01162	long intergenic non-protein coding RNA 1162	Homo sapiens long intergenic non-protein coding RNA 1162 (LINC01162), long non-coding RNA [NR_126381]	chr7:21060524-21060583	hs|7p15.3
1.90316	1.90316	0.928395	up	DCBLD2	discoidin, CUB and LCCL domain containing 2	Homo sapiens discoidin, CUB and LCCL domain containing 2 (DCBLD2), mRNA [NM_080927]	chr3:98517685-98517626	hs|3q12.1
1.90314	1.90314	0.92838	up	OR12D2	olfactory receptor, family 12, subfamily D, member 2 (gene/pseudogene)	Homo sapiens olfactory receptor, family 12, subfamily D, member 2 (gene/pseudogene) (OR12D2), mRNA [NM_013936]	chr6:29364666-29364725	hs|6p22.1
1.90292	1.90292	0.928215	up	THSD7B	thrombospondin, type I, domain containing 7B	Homo sapiens thrombospondin, type I, domain containing 7B (THSD7B), mRNA [NM_001080427]	chr2:138434204-138434263	hs|2q22.1
1.90215	-1.90215	-0.927627	down	MAPT	microtubule-associated protein tau	Homo sapiens microtubule-associated protein tau (MAPT), transcript variant 6, mRNA [NM_001123066]	chr17:44101706-44101765	hs|17q21.31
1.90146	-1.90146	-0.927108	down	KIAA1377	KIAA1377	Homo sapiens KIAA1377 (KIAA1377), mRNA [NM_020802]	chr11:101871701-101871760	hs|11q22.1
1.90119	-1.90119	-0.926902	down	WDR27	WD repeat domain 27	Homo sapiens WD repeat domain 27 (WDR27), transcript variant 1, mRNA [NM_182552]	chr6:170034569-170033151	hs|6q27
1.90062	-1.90062	-0.926467	down	NXPE2	neurexophilin and PC-esterase domain family, member 2	Homo sapiens neurexophilin and PC-esterase domain family, member 2 (NXPE2), mRNA [NM_182495]	chr11:114569440-114569499	hs|11q23.3
1.90038	1.90038	0.926284	up	PRAMEF14	PRAME family member 14	Homo sapiens PRAME family member 14 (PRAMEF14), mRNA [NM_001024661]	chr1:13447477-13447418	hs|1p36.21
1.8995	-1.8995	-0.925619	down	PPM1K	protein phosphatase, Mg2+/Mn2+ dependent, 1K	protein phosphatase, Mg2+/Mn2+ dependent, 1K [Source:HGNC Symbol;Acc:HGNC:25415] [ENST00000506423]	chr4:89192240-89192181	hs|4q22.1
1.89916	-1.89916	-0.925361	down	GGT5	gamma-glutamyltransferase 5	Homo sapiens gamma-glutamyltransferase 5 (GGT5), transcript variant 1, mRNA [NM_001099781]	chr22:24615682-24615623	hs|22q11.23
1.8985	1.8985	0.924859	up	RBP5	retinol binding protein 5, cellular	Homo sapiens retinol binding protein 5, cellular (RBP5), mRNA [NM_031491]	chr12:7280932-7280873	hs|12p13.31
1.89785	-1.89785	-0.924363	down	ANGPTL7	angiopoietin-like 7	Homo sapiens angiopoietin-like 7 (ANGPTL7), mRNA [NM_021146]	chr1:11255859-11255918	hs|1p36.22
1.89755	-1.89755	-0.924139	down	RNF170	ring finger protein 170	Homo sapiens ring finger protein 170 (RNF170), transcript variant 3, mRNA [NM_001160224]	chr8:42705993-42705934	hs|8p11.21
1.8972	-1.8972	-0.923872	down	C1S	complement component 1, s subcomponent	Homo sapiens complement component 1, s subcomponent (C1S), transcript variant 2, mRNA [NM_001734]	chr12:7178093-7178152	hs|12p13.31
1.89572	-1.89572	-0.922744	down	RAB33B	RAB33B, member RAS oncogene family	Homo sapiens RAB33B, member RAS oncogene family (RAB33B), mRNA [NM_031296]	chr4:140396778-140396837	hs|4q31.1
1.8955	-1.8955	-0.922577	down	OR8B4	olfactory receptor, family 8, subfamily B, member 4 (gene/pseudogene)	Homo sapiens olfactory receptor, family 8, subfamily B, member 4 (gene/pseudogene) (OR8B4), mRNA [NM_001005196]	chr11:124293897-124293838	hs|11q24.2
1.89542	-1.89542	-0.922515	down	IQCC	IQ motif containing C	Homo sapiens IQ motif containing C (IQCC), transcript variant 2, mRNA [NM_018134]	chr1:32673568-32673627	hs|1p35.1
1.89519	1.89519	0.922341	up	ENPP3	ectonucleotide pyrophosphatase/phosphodiesterase 3	Homo sapiens ectonucleotide pyrophosphatase/phosphodiesterase 3 (ENPP3), mRNA [NM_005021]	chr6:132061520-132067984	hs|6q23.2
1.89445	-1.89445	-0.921781	down	LOC613266	uncharacterized LOC613266	Homo sapiens hypothetical LOC613266, mRNA (cDNA clone IMAGE:5222345). [BC043571]	chr20:15873038-15872979	hs|20p12.1
1.8942	-1.8942	-0.921587	down	CXCR6	chemokine (C-X-C motif) receptor 6	Homo sapiens chemokine (C-X-C motif) receptor 6 (CXCR6), mRNA [NM_006564]	chr3:45989385-45989443	hs|3p21.31
1.89411	-1.89411	-0.921522	down	CACNA2D2	calcium channel, voltage-dependent, alpha 2/delta subunit 2	Homo sapiens calcium channel, voltage-dependent, alpha 2/delta subunit 2 (CACNA2D2), transcript variant 1, mRNA [NM_001005505]	chr3:50400526-50400467	hs|3p21.31
1.89377	-1.89377	-0.921264	down	COL14A1	collagen, type XIV, alpha 1	Homo sapiens collagen, type XIV, alpha 1 (COL14A1), mRNA [NM_021110]	chr8:121383648-121383707	hs|8q24.12
1.8933	1.8933	0.920903	up	CYP27B1	cytochrome P450, family 27, subfamily B, polypeptide 1	Homo sapiens cytochrome P450, family 27, subfamily B, polypeptide 1 (CYP27B1), mRNA [NM_000785]	chr12:58156635-58156576	hs|12q14.1
1.89233	1.89233	0.920161	up	MAATS1	MYCBP-associated, testis expressed 1	Homo sapiens MYCBP-associated, testis expressed 1 (MAATS1), mRNA [NM_033364]	chr3:119483911-119483970	hs|3q13.33
1.8912	-1.8912	-0.919299	down	SNORA12	small nucleolar RNA, H/ACA box 12	EST91069 Synovial sarcoma Homo sapiens cDNA 5' end, mRNA sequence [AA378382]	chr10:101996919-101996860	hs|10q24.31
1.89072	-1.89072	-0.918939	down	HPSE	heparanase	Homo sapiens heparanase (HPSE), transcript variant 1, mRNA [NM_006665]	chr4:84227383-84223390	hs|4q21.23
1.89039	-1.89039	-0.918683	down	TNS1	tensin 1	Homo sapiens tensin 1 (TNS1), mRNA [NM_022648]	chr2:218667628-218667569	hs|2q35
1.88973	-1.88973	-0.918179	down	CALB1	calbindin 1, 28kDa	calbindin 1, 28kDa [Source:HGNC Symbol;Acc:HGNC:1434] [ENST00000469032]	chr8:91071759-91071700	hs|8q21.3
1.88967	-1.88967	-0.918132	down	MBD2	methyl-CpG binding domain protein 2	Homo sapiens methyl-CpG binding domain protein 2 (MBD2), transcript variant 2, mRNA [NM_015832]	chr18:51729172-51729113	hs|18q21.2
1.88963	1.88963	0.918104	up	PSAPL1	prosaposin-like 1 (gene/pseudogene)	Homo sapiens prosaposin-like 1 (gene/pseudogene) (PSAPL1), mRNA [NM_001085382]	chr4:7434171-7434112	hs|4p16.1
1.88937	1.88937	0.917907	up	MYBPC1	myosin binding protein C, slow type	Homo sapiens myosin binding protein C, slow type (MYBPC1), transcript variant 10, mRNA [NM_001254723]	chr12:102045044-102045103	hs|12q23.2
1.88915	1.88915	0.917735	up	HLA-DQA1	major histocompatibility complex, class II, DQ alpha 1	Homo sapiens major histocompatibility complex, class II, DQ alpha 1 (HLA-DQA1), mRNA [NM_002122]	chr6:32609287-32609758	hs|6p21.32
1.88893	-1.88893	-0.917573	down	METTL20	methyltransferase like 20	methyltransferase like 20 [Source:HGNC Symbol;Acc:HGNC:28739] [ENST00000357721]	chr12:31825952-31826011	hs|12p11.21
1.88886	-1.88886	-0.917512	down	P2RY6	pyrimidinergic receptor P2Y, G-protein coupled, 6	Homo sapiens pyrimidinergic receptor P2Y, G-protein coupled, 6 (P2RY6), transcript variant 2, mRNA [NM_176798]	chr11:73008625-73008684	hs|11q13.4
1.88844	1.88844	0.917194	up	MYCNUT	MYCN upstream transcript (non-protein coding)	Homo sapiens MYCN upstream transcript (non-protein coding) (MYCNUT), long non-coding RNA [NR_125783]	chr2:16061805-16075940	hs|2p24.3
1.88831	1.88831	0.917096	up	GCG	glucagon	Homo sapiens glucagon (GCG), mRNA [NM_002054]	chr2:163000596-163000537	hs|2q24.2
1.88797	1.88797	0.916835	up	GIPC2	GIPC PDZ domain containing family, member 2	Homo sapiens GIPC PDZ domain containing family, member 2 (GIPC2), mRNA [NM_017655]	chr1:78603050-78603109	hs|1p31.1
1.88787	-1.88787	-0.916759	down	PRUNE2	prune homolog 2 (Drosophila)	Homo sapiens prune homolog 2 (Drosophila) (PRUNE2), mRNA [NM_015225]	chr9:79438607-79438548	hs|9q21.2
1.88776	1.88776	0.916675	up	SLCO5A1	solute carrier organic anion transporter family, member 5A1	Homo sapiens solute carrier organic anion transporter family, member 5A1 (SLCO5A1), transcript variant 1, mRNA [NM_030958]	chr8:70585075-70585016	hs|8q13.3
1.88759	1.88759	0.916545	up	KRTAP1-3	keratin associated protein 1-3	Homo sapiens keratin associated protein 1-3 (KRTAP1-3), mRNA [NM_030966]	chr17:39190466-39190407	hs|17q21.2
1.88739	1.88739	0.916395	up	OR4K17	olfactory receptor, family 4, subfamily K, member 17	Homo sapiens olfactory receptor, family 4, subfamily K, member 17 (OR4K17), mRNA [NM_001004715]	chr14:20586292-20586351	hs|14q11.2
1.88579	1.88579	0.91517	up	GSTA5	glutathione S-transferase alpha 5	Homo sapiens glutathione S-transferase alpha 5 (GSTA5), mRNA [NM_153699]	chr6:52697736-52697677	hs|6p12.2
1.88545	1.88545	0.914909	up	HLA-DRA	major histocompatibility complex, class II, DR alpha	Homo sapiens major histocompatibility complex, class II, DR alpha (HLA-DRA), mRNA [NM_019111]	chr6:32412448-32412507	hs|6p21.32
1.88538	1.88538	0.914857	up	SLC22A4	solute carrier family 22 (organic cation/zwitterion transporter), member 4	Homo sapiens solute carrier family 22 (organic cation/zwitterion transporter), member 4 (SLC22A4), mRNA [NM_003059]	chr5:131679470-131679529	hs|5q31.1
1.88519	1.88519	0.914713	up	FAM124B	family with sequence similarity 124B	Homo sapiens family with sequence similarity 124B (FAM124B), transcript variant 2, mRNA [NM_024785]	chr2:225243586-225243527	hs|2q36.2
1.88512	-1.88512	-0.914655	down	AKAP12	A kinase (PRKA) anchor protein 12	Homo sapiens A kinase (PRKA) anchor protein 12 (AKAP12), transcript variant 2, mRNA [NM_144497]	chr6:151670006-151670065	hs|6q25.1
1.88496	1.88496	0.914537	up	BEND4	BEN domain containing 4	Homo sapiens BEN domain containing 4 (BEND4), transcript variant 1, mRNA [NM_207406]	chr4:42145792-42145733	hs|4p13
1.88445	1.88445	0.914146	up	FAM167A	family with sequence similarity 167, member A	Homo sapiens family with sequence similarity 167, member A (FAM167A), mRNA [NM_053279]	chr8:11279717-11279658	hs|8p23.1
1.88351	1.88351	0.913425	up	STXBP6	syntaxin binding protein 6 (amisyn)	Homo sapiens syntaxin binding protein 6 (amisyn) (STXBP6), mRNA [NM_014178]	chr14:25326267-25325283	hs|14q12
1.88281	1.88281	0.91289	up	OR13C4	olfactory receptor, family 13, subfamily C, member 4	Homo sapiens olfactory receptor, family 13, subfamily C, member 4 (OR13C4), mRNA [NM_001001919]	chr9:107289074-107289015	hs|9q31.1
1.88262	-1.88262	-0.912745	down	NREP	neuronal regeneration related protein	Homo sapiens neuronal regeneration related protein (NREP), transcript variant 11, mRNA [NM_001142483]	chr5:111066427-111066368	hs|5q22.1
1.88242	-1.88242	-0.912588	down	PRKACB	protein kinase, cAMP-dependent, catalytic, beta	Homo sapiens protein kinase, cAMP-dependent, catalytic, beta (PRKACB), transcript variant 12, mRNA [NM_001300917]	chr1:84630045-84630104	hs|1p31.1
1.88219	1.88219	0.912409	up	TCL1A	T-cell leukemia/lymphoma 1A	Homo sapiens T-cell leukemia/lymphoma 1A (TCL1A), transcript variant 1, mRNA [NM_021966]	chr14:96176337-96176290	hs|14q32.13
1.8821	1.8821	0.912345	up	OR2T8	olfactory receptor, family 2, subfamily T, member 8	Homo sapiens olfactory receptor, family 2, subfamily T, member 8 (OR2T8), mRNA [NM_001005522]	chr1:248084323-248084382	hs|1q44
1.88199	-1.88199	-0.912261	down	FGF5	fibroblast growth factor 5	Homo sapiens fibroblast growth factor 5 (FGF5), transcript variant 1, mRNA [NM_004464]	chr4:81211110-81211166	hs|4q21.21
1.88131	-1.88131	-0.911736	down	SAV1	salvador family WW domain containing protein 1	Homo sapiens salvador family WW domain containing protein 1 (SAV1), mRNA [NM_021818]	chr14:51100478-51100419	hs|14q22.1
1.88126	1.88126	0.911698	up	CHST1	carbohydrate (keratan sulfate Gal-6) sulfotransferase 1	Homo sapiens carbohydrate (keratan sulfate Gal-6) sulfotransferase 1 (CHST1), mRNA [NM_003654]	chr11:45671095-45671036	hs|11p11.2
1.8807	-1.8807	-0.911271	down	SLC2A5	solute carrier family 2 (facilitated glucose/fructose transporter), member 5	solute carrier family 2 (facilitated glucose/fructose transporter), member 5 [Source:HGNC Symbol;Acc:HGNC:11010] [ENST00000377414]	chr1:9100715-9100656	hs|1p36.23
1.88042	-1.88042	-0.911056	down	CTDSP2	CTD (carboxy-terminal domain, RNA polymerase II, polypeptide A) small phosphatase 2	Homo sapiens CTD (carboxy-terminal domain, RNA polymerase II, polypeptide A) small phosphatase 2 (CTDSP2), mRNA [NM_005730]	chr12:58213870-58213811	hs|12q14.1
1.88026	1.88026	0.910931	up	LOC101927504	uncharacterized LOC101927504	PREDICTED: Homo sapiens uncharacterized LOC101927504 (LOC101927504), transcript variant X1, ncRNA [XR_247091]	chr1:230011379-230011320	hs|1q42.13
1.87983	1.87983	0.910603	up	C6orf201	chromosome 6 open reading frame 201	Homo sapiens chromosome 6 open reading frame 201 (C6orf201), transcript variant 1, mRNA [NM_001085401]	chr6:4087960-4099292	hs|6p25.2
1.87961	-1.87961	-0.910431	down	TMC7	transmembrane channel-like 7	Homo sapiens transmembrane channel-like 7 (TMC7), transcript variant 1, mRNA [NM_024847]	chr16:19074010-19074069	hs|16p12.3
1.87954	1.87954	0.91038	up	LOC101927843	uncharacterized LOC101927843	Homo sapiens uncharacterized LOC101927843 (LOC101927843), long non-coding RNA [NR_109959]	chr21:23381597-23381538	hs|21q21.1
1.87814	-1.87814	-0.909302	down	LMOD3	leiomodin 3 (fetal)	leiomodin 3 (fetal) [Source:HGNC Symbol;Acc:HGNC:6649] [ENST00000420581]	chr3:69156259-69156200	hs|3p14.1
1.87804	1.87804	0.909228	up	TRGV7	T cell receptor gamma variable 7 (pseudogene)	Homo sapiens T cell receptor gamma variable 7 pseudogene, mRNA (cDNA clone IMAGE:5210958). [BC027954]	chr7:38373063-38373004	hs|7p14.1
1.87666	-1.87666	-0.908166	down	ZNF836	zinc finger protein 836	Homo sapiens zinc finger protein 836 (ZNF836), mRNA [NM_001102657]	chr19:52658189-52658130	hs|19q13.41
1.87619	1.87619	0.907806	up	UGT8	UDP glycosyltransferase 8	Homo sapiens UDP glycosyltransferase 8 (UGT8), transcript variant 2, mRNA [NM_003360]	chr4:115597201-115597260	hs|4q26
1.87576	-1.87576	-0.907473	down	COL1A1	collagen, type I, alpha 1	Homo sapiens collagen, type I, alpha 1 (COL1A1), mRNA [NM_000088]	chr17:48261568-48261509	hs|17q21.33
1.87521	1.87521	0.907054	up	NAMPT	nicotinamide phosphoribosyltransferase	Homo sapiens nicotinamide phosphoribosyltransferase (NAMPT), mRNA [NM_005746]	chr7:105913036-105912977	hs|7q22.3
1.87501	-1.87501	-0.906899	down	PARP1	poly (ADP-ribose) polymerase 1	poly (ADP-ribose) polymerase 1 [Source:HGNC Symbol;Acc:HGNC:270] [ENST00000366790]	chr1:226589743-226589684	hs|1q42.12
1.87413	1.87413	0.90622	up	OR5K4	olfactory receptor, family 5, subfamily K, member 4	Homo sapiens olfactory receptor, family 5, subfamily K, member 4 (OR5K4), mRNA [NM_001005517]	chr3:98073490-98073549	hs|3q11.2
1.87373	-1.87373	-0.905912	down	NOTCH4	notch 4	Homo sapiens notch 4 (NOTCH4), mRNA [NM_004557]	chr6:32162683-32162624	hs|6p21.32
1.87285	1.87285	0.905233	up	CALY	calcyon neuron-specific vesicular protein	calcyon neuron-specific vesicular protein [Source:HGNC Symbol;Acc:HGNC:17938] [ENST00000467611]	chr10:135139755-135139696	hs|10q26.3
1.87224	1.87224	0.904769	up	SNAP25	synaptosomal-associated protein, 25kDa	Homo sapiens synaptosomal-associated protein, 25kDa (SNAP25), transcript variant 1, mRNA [NM_003081]	chr20:10287989-10288048	hs|20p12.2
1.87205	1.87205	0.904616	up	NMNAT3	nicotinamide nucleotide adenylyltransferase 3	Homo sapiens nicotinamide nucleotide adenylyltransferase 3 (NMNAT3), transcript variant 1, mRNA [NM_178177]	chr3:139279566-139279507	hs|3q23
1.87096	-1.87096	-0.903779	down	NAALADL2	N-acetylated alpha-linked acidic dipeptidase-like 2	Homo sapiens N-acetylated alpha-linked acidic dipeptidase-like 2 (NAALADL2), mRNA [NM_207015]	chr3:175523323-175523382	hs|3q26.31
1.87017	1.87017	0.903169	up	ZPBP	zona pellucida binding protein	Homo sapiens zona pellucida binding protein (ZPBP), transcript variant 1, mRNA [NM_007009]	chr7:49977188-49977129	hs|7p12.2
1.86958	-1.86958	-0.902717	down	TCF7L2	transcription factor 7-like 2 (T-cell specific, HMG-box)	Homo sapiens transcription factor 7-like 2 (T-cell specific, HMG-box) (TCF7L2), transcript variant 2, mRNA [NM_030756]	chr10:114925978-114926037	hs|10q25.3
1.86922	-1.86922	-0.902433	down	HSPB2	heat shock 27kDa protein 2	Homo sapiens heat shock 27kDa protein 2 (HSPB2), mRNA [NM_001541]	chr11:111784741-111784800	hs|11q23.1
1.86844	-1.86844	-0.901831	down	RIC1	RAB6A GEF complex partner 1	Homo sapiens RAB6A GEF complex partner 1 (RIC1), transcript variant 2, mRNA [NM_001135920]	chr9:5769248-5769307	hs|9p24.1
1.86807	1.86807	0.90155	up	LOC102723525	uncharacterized LOC102723525	PREDICTED: Homo sapiens uncharacterized LOC102723525 (LOC102723525), ncRNA [XR_425708]	chr4:10740056-10740115	hs|4p16.1
1.86791	1.86791	0.901425	up	FOLH1	folate hydrolase (prostate-specific membrane antigen) 1	Homo sapiens folate hydrolase (prostate-specific membrane antigen) 1 (FOLH1), transcript variant 4, mRNA [NM_001193472]	chr11:49204761-49204702	hs|11p11.12
1.86758	1.86758	0.90117	up	LOXL3	lysyl oxidase-like 3	Homo sapiens lysyl oxidase-like 3 (LOXL3), transcript variant 1, mRNA [NM_032603]	chr2:74761088-74761029	hs|2p13.1
1.86606	1.86606	0.899992	up	MDGA2	MAM domain containing glycosylphosphatidylinositol anchor 2	Homo sapiens MAM domain containing glycosylphosphatidylinositol anchor 2 (MDGA2), transcript variant 1, mRNA [NM_001113498]	chr14:47311067-47311008	hs|14q21.3
1.86602	1.86602	0.899963	up	LOC101927533	uncharacterized LOC101927533	Homo sapiens cDNA FLJ16124 fis, clone BRACE2011677. [AK131224]	chr2:66305736-66305795	hs|2p14
1.8656	1.8656	0.899642	up	lnc-GLIPR1-3	lnc-GLIPR1-3:1	DA381791 BRTHA2 Homo sapiens cDNA clone BRTHA2015483 5', mRNA sequence [DA381791]	chr12:76425001-76425060	hs|12q21.2
1.86556	1.86556	0.89961	up	RND3	Rho family GTPase 3	Homo sapiens Rho family GTPase 3 (RND3), transcript variant 2, mRNA [NM_005168]	chr2:151325166-151325107	hs|2q23.3
1.86527	1.86527	0.899388	up	LINC00613	long intergenic non-protein coding RNA 613	Homo sapiens long intergenic non-protein coding RNA 613 (LINC00613), transcript variant 1, long non-coding RNA [NR_103762]	chr4:136788262-136788203	hs|4q28.3
1.86522	-1.86522	-0.899342	down	NREP	neuronal regeneration related protein	Homo sapiens neuronal regeneration related protein (NREP), transcript variant 1, mRNA [NM_004772]	chr5:111065150-111065091	hs|5q22.1
1.8634	1.8634	0.897938	up	lnc-PCDH9-2	lnc-PCDH9-2:1	Homo sapiens cDNA clone IMAGE:4838586. [BC066892]	chr13:68157290-68157231	hs|13q21.32
1.86295	1.86295	0.897593	up	GPR116	G protein-coupled receptor 116	Homo sapiens G protein-coupled receptor 116 (GPR116), transcript variant 2, mRNA [NM_001098518]	chr6:46823775-46823716	hs|6p12.3
1.86253	-1.86253	-0.897262	down	TRAF5	TNF receptor-associated factor 5	Homo sapiens TNF receptor-associated factor 5 (TRAF5), transcript variant 1, mRNA [NM_004619]	chr1:211548188-211548247	hs|1q32.3
1.86239	1.86239	0.897154	up	GIMAP7	GTPase, IMAP family member 7	Homo sapiens GTPase, IMAP family member 7 (GIMAP7), mRNA [NM_153236]	chr7:150217417-150217476	hs|7q36.1
1.86237	-1.86237	-0.897137	down	CPED1	cadherin-like and PC-esterase domain containing 1	Homo sapiens cadherin-like and PC-esterase domain containing 1 (CPED1), transcript variant 2, mRNA [NM_001105533]	chr7:120901888-120901947	hs|7q31.31
1.86166	-1.86166	-0.896592	down	LOC100129280	uncharacterized LOC100129280	Homo sapiens cDNA FLJ44650 fis, clone BRACE2039607. [AK126613]	chr7:97809359-97809418	hs|7q21.3
1.86143	-1.86143	-0.896413	down	RECK	reversion-inducing-cysteine-rich protein with kazal motifs	Homo sapiens reversion-inducing-cysteine-rich protein with kazal motifs (RECK), mRNA [NM_021111]	chr9:36124319-36124378	hs|9p13.3
1.86139	-1.86139	-0.896384	down	ALDH4A1	aldehyde dehydrogenase 4 family, member A1	Homo sapiens aldehyde dehydrogenase 4 family, member A1 (ALDH4A1), transcript variant P5CDhS, mRNA [NM_170726]	chr1:19209897-19209838	hs|1p36.13
1.8612	1.8612	0.896231	up	LINC01365	long intergenic non-protein coding RNA 1365	Homo sapiens long intergenic non-protein coding RNA 1365 (LINC01365), long non-coding RNA [NR_110660]	chr4:120720352-120720293	hs|4q26
1.86085	1.86085	0.895963	up	CD38	CD38 molecule	Homo sapiens CD38 molecule (CD38), mRNA [NM_001775]	chr4:15850185-15850244	hs|4p15.32
1.86062	1.86062	0.89578	up	ZNF385D	zinc finger protein 385D	Homo sapiens zinc finger protein 385D (ZNF385D), mRNA [NM_024697]	chr3:21478580-21478521	hs|3p24.3
1.86034	1.86034	0.89557	up	UBTFL1	upstream binding transcription factor, RNA polymerase I-like 1	Homo sapiens upstream binding transcription factor, RNA polymerase I-like 1 (UBTFL1), mRNA [NM_001143975]	chr11:89820180-89820239	hs|11q14.3
1.8602	1.8602	0.895458	up	KAAG1	kidney associated antigen 1	Homo sapiens kidney associated antigen 1 (KAAG1), mRNA [NM_181337]	chr6:24357605-24357664	hs|6p22.3
1.85924	1.85924	0.894714	up	MYCNUT	MYCN upstream transcript (non-protein coding)	Homo sapiens MYCN upstream transcript (non-protein coding) (MYCNUT), long non-coding RNA [NR_125783]	chr2:16061095-16061154	hs|2p24.3
1.85906	1.85906	0.894575	up	BEX2	brain expressed X-linked 2	Homo sapiens brain expressed X-linked 2 (BEX2), transcript variant 1, mRNA [NM_001168399]	chrX:102564489-102564430	hs|Xq22.1
1.85885	-1.85885	-0.894412	down	GJA9	gap junction protein, alpha 9, 59kDa	Homo sapiens gap junction protein, alpha 9, 59kDa (GJA9), mRNA [NM_030772]	chr1:39340215-39340156	hs|1p34.3
1.85778	1.85778	0.893578	up	C9orf43	chromosome 9 open reading frame 43	Homo sapiens chromosome 9 open reading frame 43 (C9orf43), transcript variant 1, mRNA [NM_152786]	chr9:116191529-116191588	hs|9q32
1.85616	-1.85616	-0.892324	down	DKK2	dickkopf WNT signaling pathway inhibitor 2	Homo sapiens dickkopf WNT signaling pathway inhibitor 2 (DKK2), mRNA [NM_014421]	chr4:107843709-107843650	hs|4q25
1.85612	1.85612	0.892291	up	ADTRP	androgen-dependent TFPI-regulating protein	Homo sapiens androgen-dependent TFPI-regulating protein (ADTRP), transcript variant 2, mRNA [NM_032744]	chr6:11714061-11714002	hs|6p24.1
1.85596	1.85596	0.892169	up	SORCS3	sortilin-related VPS10 domain containing receptor 3	Homo sapiens sortilin-related VPS10 domain containing receptor 3 (SORCS3), mRNA [NM_014978]	chr10:107023073-107023132	hs|10q25.1
1.85596	-1.85596	-0.892165	down	ZIC4	Zic family member 4	Homo sapiens Zic family member 4 (ZIC4), transcript variant 3, mRNA [NM_032153]	chr3:147104136-147104077	hs|3q24
1.8553	-1.8553	-0.891652	down	IMMT	inner membrane protein, mitochondrial	inner membrane protein, mitochondrial [Source:HGNC Symbol;Acc:HGNC:6047] [ENST00000474969]	chr2:86385558-86385499	hs|2p11.2
1.85472	1.85472	0.891201	up	SMYD3	SET and MYND domain containing 3	Homo sapiens SET and MYND domain containing 3 (SMYD3), transcript variant 2, mRNA [NM_022743]	chr1:246490603-246490544	hs|1q44
1.85463	1.85463	0.891128	up	SH3KBP1	SH3-domain kinase binding protein 1	Homo sapiens SH3-domain kinase binding protein 1 (SH3KBP1), transcript variant 2, mRNA [NM_001024666]	chrX:19610255-19610196	hs|Xp22.12
1.85457	-1.85457	-0.891083	down	FGD4	FYVE, RhoGEF and PH domain containing 4	Homo sapiens FYVE, RhoGEF and PH domain containing 4 (FGD4), mRNA [NM_139241]	chr12:32764149-32764208	hs|12p11.21
1.85423	1.85423	0.890817	up	ANKRD20A12P	ankyrin repeat domain 20 family, member A12, pseudogene	Homo sapiens ankyrin repeat domain 20 family, member A12, pseudogene (ANKRD20A12P), non-coding RNA [NR_046228]	chr1:142697696-142697637	hs|1q21.1
1.85405	-1.85405	-0.890681	down	ATP9A	ATPase, class II, type 9A	Homo sapiens ATPase, class II, type 9A (ATP9A), mRNA [NM_006045]	chr20:50213418-50213359	hs|20q13.2
1.85281	1.85281	0.889712	up	KCNJ16	potassium channel, inwardly rectifying subfamily J, member 16	Homo sapiens potassium channel, inwardly rectifying subfamily J, member 16 (KCNJ16), transcript variant 2, mRNA [NM_170741]	chr17:68131523-68131582	hs|17q24.3
1.85277	1.85277	0.889681	up	LOC100996844	mucin-3A-like	PREDICTED: Homo sapiens mucin-3A-like (LOC100996844), partial mRNA [XM_003846731]
1.85274	1.85274	0.889664	up	lnc-BCL2L11-3	lnc-BCL2L11-3:2	Homo sapiens cDNA FLJ35091 fis, clone PLACE6005786. [AK092410]	chr2:112257889-112257948	hs|2q13
1.85214	1.85214	0.889193	up	OR51B2	olfactory receptor, family 51, subfamily B, member 2 (gene/pseudogene)	Homo sapiens olfactory receptor, family 51, subfamily B, member 2 (gene/pseudogene) (OR51B2), mRNA [NM_033180]	chr11:5345150-5345091	hs|11p15.4
1.85209	1.85209	0.889156	up	NEK2	NIMA-related kinase 2	Homo sapiens NIMA-related kinase 2 (NEK2), transcript variant 1, mRNA [NM_002497]	chr1:211842647-211842588	hs|1q32.3
1.85183	1.85183	0.88895	up	IFNA21	interferon, alpha 21	Homo sapiens interferon, alpha 21 (IFNA21), mRNA [NM_002175]	chr9:21166331-21166272	hs|9p21.3
1.85164	1.85164	0.888801	up	OR8A1	olfactory receptor, family 8, subfamily A, member 1	Homo sapiens olfactory receptor, family 8, subfamily A, member 1 (OR8A1), mRNA [NM_001005194]	chr11:124440780-124440839	hs|11q24.2
1.851	-1.851	-0.888301	down	LINC01482	long intergenic non-protein coding RNA 1482	Homo sapiens long intergenic non-protein coding RNA 1482 (LINC01482), long non-coding RNA [NR_110825]	chr17:66638824-66638883	hs|17q24.2
1.85087	1.85087	0.888206	up	FTH1	ferritin, heavy polypeptide 1	Homo sapiens ferritin, heavy polypeptide 1 (FTH1), mRNA [NM_002032]	chr11:61732335-61732276	hs|11q12.3
1.8507	-1.8507	-0.888071	down	RAMP1	receptor (G protein-coupled) activity modifying protein 1	Homo sapiens receptor (G protein-coupled) activity modifying protein 1 (RAMP1), mRNA [NM_005855]	chr2:238820539-238820598	hs|2q37.3
1.85041	-1.85041	-0.887844	down	SERPINA3	serpin peptidase inhibitor, clade A (alpha-1 antiproteinase, antitrypsin), member 3	Homo sapiens serpin peptidase inhibitor, clade A (alpha-1 antiproteinase, antitrypsin), member 3 (SERPINA3), mRNA [NM_001085]	chr14:95088682-95088741	hs|14q32.13
1.85022	-1.85022	-0.887699	down	ARHGEF25	Rho guanine nucleotide exchange factor (GEF) 25	Homo sapiens Rho guanine nucleotide exchange factor (GEF) 25 (ARHGEF25), transcript variant 1, mRNA [NM_182947]	chr12:58010715-58010774	hs|12q13.3
1.84907	-1.84907	-0.8868	down	SNTA1	syntrophin, alpha 1	Homo sapiens syntrophin, alpha 1 (SNTA1), mRNA [NM_003098]	chr20:31996598-31996539	hs|20q11.21
1.84876	-1.84876	-0.886555	down	RUNX1T1	runt-related transcription factor 1; translocated to, 1 (cyclin D-related)	Homo sapiens runt-related transcription factor 1; translocated to, 1 (cyclin D-related) (RUNX1T1), transcript variant 1, mRNA [NM_004349]	chr8:92972310-92972251	hs|8q21.3
1.8484	-1.8484	-0.886274	down	MTRNR2L9	MT-RNR2-like 9 (pseudogene)	Homo sapiens MT-RNR2-like 9 (pseudogene) (MTRNR2L9), mRNA [NM_001190706]	chr6:62284471-62284530	hs|6q11.1
1.84754	-1.84754	-0.885604	down	LOC100127972	uncharacterized LOC100127972	Homo sapiens cDNA FLJ35488 fis, clone SMINT2008545. [AK092807]	chr19:35658450-35658509	hs|19q13.12
1.84742	1.84742	0.885515	up	GTSCR1	Gilles de la Tourette syndrome chromosome region, candidate 1 (non-protein coding)	Homo sapiens Gilles de la Tourette syndrome chromosome region, candidate 1 (non-protein coding) (GTSCR1), mRNA [NM_001278515]	chr18:68309839-68297925	hs|18q22.2
1.847	-1.847	-0.885181	down	TTC34	tetratricopeptide repeat domain 34	tetratricopeptide repeat domain 34 [Source:HGNC Symbol;Acc:HGNC:34297] [ENST00000579787]	chr1:2568012-2567953	hs|1p36.32
1.84698	-1.84698	-0.885165	down	CD248	CD248 molecule, endosialin	Homo sapiens CD248 molecule, endosialin (CD248), mRNA [NM_020404]	chr11:66082335-66082276	hs|11q13.2
1.8468	-1.8468	-0.885031	down	SEMA5A	sema domain, seven thrombospondin repeats (type 1 and type 1-like), transmembrane domain (TM) and short cytoplasmic domain, (semaphorin) 5A	Homo sapiens sema domain, seven thrombospondin repeats (type 1 and type 1-like), transmembrane domain (TM) and short cytoplasmic domain, (semaphorin) 5A (SEMA5A), mRNA [NM_003966]	chr5:9035304-9035245	hs|5p15.31
1.84639	1.84639	0.884709	up	GHRH	growth hormone releasing hormone	Homo sapiens growth hormone releasing hormone (GHRH), transcript variant 1, mRNA [NM_021081]	chr20:35879622-35879563	hs|20q11.23
1.84447	-1.84447	-0.883207	down	CALCRL	calcitonin receptor-like	Homo sapiens calcitonin receptor-like (CALCRL), transcript variant 1, mRNA [NM_005795]	chr2:188207915-188207856	hs|2q32.1
1.84329	1.84329	0.882279	up	LOC101927592	uncharacterized LOC101927592	Homo sapiens uncharacterized LOC101927592 (LOC101927592), long non-coding RNA [NR_104646]	chr12:127399907-127399848	hs|12q24.32
1.8431	1.8431	0.882133	up	IL2RA	interleukin 2 receptor, alpha	Homo sapiens interleukin 2 receptor, alpha (IL2RA), mRNA [NM_000417]	chr10:6054565-6054506	hs|10p15.1
1.84298	1.84298	0.882043	up	LOC102477328	uncharacterized LOC102477328	Homo sapiens uncharacterized LOC102477328 (LOC102477328), long non-coding RNA [NR_105007]	chr5:71870072-71870013	hs|5q13.2
1.84295	1.84295	0.882017	up	WNT10A	wingless-type MMTV integration site family, member 10A	Homo sapiens wingless-type MMTV integration site family, member 10A (WNT10A), mRNA [NM_025216]	chr2:219758393-219758452	hs|2q35
1.84269	-1.84269	-0.88181	down	COL4A2-AS2	COL4A2 antisense RNA 2	PREDICTED: Homo sapiens COL4A2 antisense RNA 2 (COL4A2-AS2), misc_RNA [XR_158875]	chr13:111108645-111108586	hs|13q34
1.84253	1.84253	0.881686	up	SHC3	SHC (Src homology 2 domain containing) transforming protein 3	Homo sapiens SHC (Src homology 2 domain containing) transforming protein 3 (SHC3), mRNA [NM_016848]	chr9:91653107-91653048	hs|9q22.1
1.8423	-1.8423	-0.881511	down	RTKN2	rhotekin 2	Homo sapiens cDNA FLJ39352 fis, clone PEBLM2001312, weakly similar to Homo sapiens rhotekin mRNA. [AK096671]	chr10:63944140-63944081	hs|10q21.2
1.84218	1.84218	0.881412	up	TREML1	triggering receptor expressed on myeloid cells-like 1	Homo sapiens triggering receptor expressed on myeloid cells-like 1 (TREML1), transcript variant 1, mRNA [NM_178174]	chr6:41117457-41117398	hs|6p21.1
1.84191	1.84191	0.881201	up	CDH19	cadherin 19, type 2	Homo sapiens cadherin 19, type 2 (CDH19), transcript variant 1, mRNA [NM_021153]	chr18:64171885-64171826	hs|18q22.1
1.84166	-1.84166	-0.881009	down	PRPS1	phosphoribosyl pyrophosphate synthetase 1	phosphoribosyl pyrophosphate synthetase 1 [Source:HGNC Symbol;Acc:HGNC:9462] [ENST00000372419]	chrX:106884295-106884354	hs|Xq22.3
1.84127	1.84127	0.8807	up	YWHAE	tyrosine 3-monooxygenase/tryptophan 5-monooxygenase activation protein, epsilon	tyrosine 3-monooxygenase/tryptophan 5-monooxygenase activation protein, epsilon [Source:HGNC Symbol;Acc:HGNC:12851] [ENST00000576854]	chr17:1302259-1302200	hs|17p13.3
1.84055	-1.84055	-0.880137	down	C17orf107	chromosome 17 open reading frame 107	Homo sapiens chromosome 17 open reading frame 107 (C17orf107), mRNA [NM_001145536]	chr17:4806148-4806207	hs|17p13.2
1.83999	1.83999	0.879701	up	IDO1	indoleamine 2,3-dioxygenase 1	Homo sapiens indoleamine 2,3-dioxygenase 1 (IDO1), mRNA [NM_002164]	chr8:39785529-39785588	hs|8p11.21
1.83974	1.83974	0.879503	up	IFIT3	interferon-induced protein with tetratricopeptide repeats 3	Homo sapiens interferon-induced protein with tetratricopeptide repeats 3 (IFIT3), transcript variant 3, mRNA [NM_001289758]	chr10:91099762-91099821	hs|10q23.31
1.8389	-1.8389	-0.878844	down	RHD	Rh blood group, D antigen	Homo sapiens Rh blood group, D antigen (RHD), transcript variant 1, mRNA [NM_016124]	chr1:25656446-25656505	hs|1p36.11
1.83867	1.83867	0.878661	up	CAMK2A	calcium/calmodulin-dependent protein kinase II alpha	Homo sapiens calcium/calmodulin-dependent protein kinase II alpha (CAMK2A), transcript variant 1, mRNA [NM_015981]	chr5:149599410-149599351	hs|5q32
1.83841	1.83841	0.878462	up	PTCHD1	patched domain containing 1	Homo sapiens patched domain containing 1 (PTCHD1), mRNA [NM_173495]	chrX:23414819-23414878	hs|Xp22.11
1.83817	1.83817	0.878272	up	TCTEX1D1	Tctex1 domain containing 1	Homo sapiens Tctex1 domain containing 1 (TCTEX1D1), mRNA [NM_152665]	chr1:67244120-67244179	hs|1p31.3
1.83816	1.83816	0.878262	up	MPZL3	myelin protein zero-like 3	Homo sapiens myelin protein zero-like 3 (MPZL3), transcript variant 1, mRNA [NM_198275]	chr11:118100396-118100337	hs|11q23.3
1.83813	1.83813	0.87824	up	LPHN1	latrophilin 1	Homo sapiens latrophilin 1 (LPHN1), transcript variant 1, mRNA [NM_001008701]	chr19:14258817-14258758	hs|19p13.12
1.83743	-1.83743	-0.877688	down	ZNF254	zinc finger protein 254	Homo sapiens zinc finger protein 254 (ZNF254), transcript variant 1, mRNA [NM_001278677]	chr19:24312428-24312487	hs|19p12
1.83675	-1.83675	-0.877153	down	DENND3	DENN/MADD domain containing 3	DENN/MADD domain containing 3 [Source:HGNC Symbol;Acc:HGNC:29134] [ENST00000520482]	chr8:142186290-142186349	hs|8q24.3
1.83613	1.83613	0.876669	up	GDF15	growth differentiation factor 15	Homo sapiens growth differentiation factor 15 (GDF15), mRNA [NM_004864]	chr19:18499890-18499949	hs|19p13.11
1.83591	-1.83591	-0.876494	down	SYNRG	synergin, gamma	synergin, gamma [Source:HGNC Symbol;Acc:HGNC:557] [ENST00000614000]	chr17:35927039-35926980	hs|17q12
1.83575	-1.83575	-0.876369	down	ZSCAN25	zinc finger and SCAN domain containing 25	Homo sapiens zinc finger and SCAN domain containing 25 (ZSCAN25), mRNA [NM_145115]	chr7:99229296-99229355	hs|7q22.1
1.83565	-1.83565	-0.876291	down	lnc-HOXA13-1	lnc-HOXA13-1:1	Q3KII3_PSEPF (Q3KII3) Inner-membrane translocator, partial (6%) [THC2773766]	chr7:27226951-27226892	hs|7p15.2
1.83564	1.83564	0.876286	up	TAP2	transporter 2, ATP-binding cassette, sub-family B (MDR/TAP)	Homo sapiens transporter 2, ATP-binding cassette, sub-family B (MDR/TAP) (TAP2), transcript variant 2, mRNA [NM_018833]	chr6:32789863-32789804	hs|6p21.32
1.83544	1.83544	0.876128	up	OR10A2	olfactory receptor, family 10, subfamily A, member 2	Homo sapiens olfactory receptor, family 10, subfamily A, member 2 (OR10A2), mRNA [NM_001004460]	chr11:6891028-6891087	hs|11p15.4
1.83534	1.83534	0.876048	up	SH3TC2	SH3 domain and tetratricopeptide repeats 2	Homo sapiens SH3 domain and tetratricopeptide repeats 2 (SH3TC2), mRNA [NM_024577]	chr5:148381027-148380968	hs|5q32
1.83524	1.83524	0.875972	up	HIST2H2BE	histone cluster 2, H2be	Homo sapiens histone cluster 2, H2be (HIST2H2BE), mRNA [NM_003528]	chr1:149857123-149857064	hs|1q21.2
1.83519	1.83519	0.875932	up	TMC8	transmembrane channel-like 8	Homo sapiens transmembrane channel-like 8 (TMC8), mRNA [NM_152468]	chr17:76128930-76129524	hs|17q25.3
1.83514	-1.83514	-0.875894	down	HSPG2	heparan sulfate proteoglycan 2	Homo sapiens heparan sulfate proteoglycan 2 (HSPG2), transcript variant 1, mRNA [NM_001291860]	chr1:22162129-22162070	hs|1p36.12
1.8349	-1.8349	-0.875703	down	MATN2	matrilin 2	Homo sapiens matrilin 2 (MATN2), transcript variant 2, mRNA [NM_030583]	chr8:99042755-99042814	hs|8q22.2
1.83395	-1.83395	-0.874951	down	ZNF778	zinc finger protein 778	Homo sapiens zinc finger protein 778 (ZNF778), transcript variant 1, mRNA [NM_001201407]	chr16:89295210-89295269	hs|16q24.3
1.83375	1.83375	0.8748	up	KCNA1	potassium channel, voltage gated shaker related subfamily A, member 1	Homo sapiens potassium channel, voltage gated shaker related subfamily A, member 1 (KCNA1), mRNA [NM_000217]	chr12:5026618-5026677	hs|12p13.32
1.83365	1.83365	0.874715	up	CD244	CD244 molecule, natural killer cell receptor 2B4	Homo sapiens CD244 molecule, natural killer cell receptor 2B4 (CD244), transcript variant 2, mRNA [NM_001166663]	chr1:160803901-160803842	hs|1q23.3
1.83363	1.83363	0.874699	up	IBSP	integrin-binding sialoprotein	Homo sapiens integrin-binding sialoprotein (IBSP), mRNA [NM_004967]	chr4:88731881-88732537	hs|4q22.1
1.83312	1.83312	0.8743	up	FOSL1	FOS-like antigen 1	Homo sapiens FOS-like antigen 1 (FOSL1), transcript variant 1, mRNA [NM_005438]	chr11:65660157-65660098	hs|11q13.1
1.83312	1.83312	0.874299	up	KRT34	keratin 34, type I	Homo sapiens keratin 34, type I (KRT34), mRNA [NM_021013]	chr17:39534077-39534018	hs|17q21.2
1.83275	1.83275	0.874007	up	MYO7B	myosin VIIB	Homo sapiens myosin VIIB (MYO7B), mRNA [NM_001080527]	chr2:128394487-128394948	hs|2q14.3
1.83261	-1.83261	-0.873899	down	SLC22A11	solute carrier family 22 (organic anion/urate transporter), member 11	Homo sapiens solute carrier family 22 (organic anion/urate transporter), member 11 (SLC22A11), mRNA [NM_018484]	chr11:64338937-64338996	hs|11q13.1
1.83261	-1.83261	-0.873899	down	DCN	decorin	Homo sapiens decorin (DCN), transcript variant E, mRNA [NM_133507]	chr12:91572259-91572200	hs|12q21.33
1.83242	1.83242	0.873751	up	FLJ40288	uncharacterized FLJ40288	Homo sapiens uncharacterized FLJ40288 (FLJ40288), long non-coding RNA [NR_046323]	chr7:132412496-132412555	hs|7q32.3
1.83097	-1.83097	-0.872606	down	NOX5	NADPH oxidase, EF-hand calcium binding domain 5	Homo sapiens NADPH oxidase, EF-hand calcium binding domain 5 (NOX5), transcript variant 1, mRNA [NM_024505]	chr15:69348985-69349044	hs|15q23
1.8308	1.8308	0.872473	up	FSCN3	fascin actin-bundling protein 3, testicular	Homo sapiens fascin actin-bundling protein 3, testicular (FSCN3), mRNA [NM_020369]	chr7:127238618-127239463	hs|7q32.1
1.83018	1.83018	0.871982	up	LOC101929826	uncharacterized LOC101929826	PREDICTED: Homo sapiens uncharacterized LOC101929826 (LOC101929826), transcript variant X3, ncRNA [XR_426502]	chr1:149005999-149006058	hs|1q21.2
1.83015	-1.83015	-0.87196	down	NPR3	natriuretic peptide receptor 3	Homo sapiens natriuretic peptide receptor 3 (NPR3), transcript variant 1, mRNA [NM_001204375]	chr5:32791717-32791776	hs|5p13.3
1.82979	-1.82979	-0.871678	down	F2RL2	coagulation factor II (thrombin) receptor-like 2	Homo sapiens coagulation factor II (thrombin) receptor-like 2 (F2RL2), transcript variant 1, mRNA [NM_004101]	chr5:75911558-75911499	hs|5q13.3
1.82963	-1.82963	-0.871551	down	lnc-GFM1-1	lnc-GFM1-1:3	Homo sapiens cytokine receptor CRL2 precursor, mRNA, complete cds. [AY070437]	chr3:158461167-158461226	hs|3q25.32
1.8295	1.8295	0.871448	up	PASK	PAS domain containing serine/threonine kinase	Homo sapiens PAS domain containing serine/threonine kinase (PASK), transcript variant 5, mRNA [NM_001252124]	chr2:242053592-242053533	hs|2q37.3
1.82794	-1.82794	-0.870219	down	TET2	tet methylcytosine dioxygenase 2	Homo sapiens tet methylcytosine dioxygenase 2 (TET2), transcript variant 2, mRNA [NM_017628]	chr4:106163842-106163901	hs|4q24
1.82775	-1.82775	-0.870071	down	RBM44	RNA binding motif protein 44	Homo sapiens RNA binding motif protein 44 (RBM44), mRNA [NM_001080504]	chr2:238751106-238751165	hs|2q37.3
1.82749	-1.82749	-0.869866	down	CALHM2	calcium homeostasis modulator 2	Homo sapiens cDNA FLJ43286 fis, clone MESAN2001979. [AK125276]	chr10:105208930-105208871	hs|10q24.33
1.82746	1.82746	0.869838	up	LY6K	lymphocyte antigen 6 complex, locus K	Homo sapiens lymphocyte antigen 6 complex, locus K (LY6K), transcript variant 1, mRNA [NM_017527]	chr8:143784821-143784880	hs|8q24.3
1.82711	1.82711	0.86956	up	MUC17	mucin 17, cell surface associated	Homo sapiens mucin 17, cell surface associated (MUC17), mRNA [NM_001040105]	chr7:100701904-100701963	hs|7q22.1
1.82673	1.82673	0.869263	up	OOSP1	oocyte secreted protein 1	oocyte secreted protein 1 [Source:HGNC Symbol;Acc:HGNC:49233] [ENST00000398992]	chr11:59705928-59705987	hs|11q12.1
1.82662	1.82662	0.869175	up	LINC00577	long intergenic non-protein coding RNA 577	Homo sapiens long intergenic non-protein coding RNA 577 (LINC00577), long non-coding RNA [NR_046407]	chr6:105384228-105384169	hs|6q16.3
1.8265	-1.8265	-0.86908	down	CYP2U1	cytochrome P450, family 2, subfamily U, polypeptide 1	Homo sapiens cytochrome P450, family 2, subfamily U, polypeptide 1 (CYP2U1), mRNA [NM_183075]	chr4:108874445-108874504	hs|4q25
1.82646	1.82646	0.869051	up	LOC284912	uncharacterized LOC284912	Homo sapiens hypothetical gene supported by BC001801, mRNA (cDNA clone MGC:3170 IMAGE:3355513), complete cds. [BC001801]	chr22:36023019-36022989	hs|22q12.3
1.82604	-1.82604	-0.868722	down	PALLD	palladin, cytoskeletal associated protein	Homo sapiens palladin, cytoskeletal associated protein (PALLD), transcript variant 3, mRNA [NM_001166109]	chr4:169837061-169837120	hs|4q32.3
1.82603	-1.82603	-0.868714	down	SERPINA1	serpin peptidase inhibitor, clade A (alpha-1 antiproteinase, antitrypsin), member 1	Homo sapiens serpin peptidase inhibitor, clade A (alpha-1 antiproteinase, antitrypsin), member 1 (SERPINA1), transcript variant 2, mRNA [NM_001002236]	chr14:94844850-94844791	hs|14q32.13
1.82587	1.82587	0.868586	up	RBM47	RNA binding motif protein 47	Homo sapiens RNA binding motif protein 47 (RBM47), transcript variant 2, mRNA [NM_019027]	chr4:40426236-40426177	hs|4p14
1.82537	-1.82537	-0.86819	down	TF	transferrin	Homo sapiens transferrin (TF), mRNA [NM_001063]	chr3:133495990-133496049	hs|3q22.1
1.82513	1.82513	0.867998	up	TRIM43	tripartite motif containing 43	Homo sapiens tripartite motif containing 43 (TRIM43), mRNA [NM_138800]	chr2:96265191-96265250	hs|2q11.1
1.82508	-1.82508	-0.867959	down	LOC200609	uncharacterized LOC200609	Homo sapiens mRNA; cDNA DKFZp434E2221 (from clone DKFZp434E2221) [AL137458]	chr2:238085757-238085816	hs|2q37.3
1.82492	-1.82492	-0.867831	down	SNED1	sushi, nidogen and EGF-like domains 1	Homo sapiens sushi, nidogen and EGF-like domains 1 (SNED1), mRNA [NM_001080437]	chr2:242032388-242032447	hs|2q37.3
1.82426	1.82426	0.867313	up	PYHIN1	pyrin and HIN domain family, member 1	pyrin and HIN domain family, member 1 [Source:HGNC Symbol;Acc:HGNC:28894] [ENST00000368135]	chr1:158909269-158909328	hs|1q23.1
1.82417	1.82417	0.867244	up	RIMS2	regulating synaptic membrane exocytosis 2	Homo sapiens regulating synaptic membrane exocytosis 2 (RIMS2), transcript variant 2, mRNA [NM_014677]	chr8:104928692-104928751	hs|8q22.3
1.82408	-1.82408	-0.867165	down	KLB	klotho beta	Homo sapiens klotho beta (KLB), mRNA [NM_175737]	chr4:39450122-39450181	hs|4p14
1.82404	-1.82404	-0.867138	down	PVRIG	poliovirus receptor related immunoglobulin domain containing	Homo sapiens poliovirus receptor related immunoglobulin domain containing (PVRIG), mRNA [NM_024070]	chr7:99819051-99819110	hs|7q22.1
1.82395	1.82395	0.867066	up	TNFAIP6	tumor necrosis factor, alpha-induced protein 6	Homo sapiens tumor necrosis factor, alpha-induced protein 6 (TNFAIP6), mRNA [NM_007115]	chr2:152226595-152226654	hs|2q23.3
1.8232	-1.8232	-0.86647	down	SNN	stannin	Homo sapiens stannin (SNN), mRNA [NM_003498]	chr16:11772637-11772696	hs|16p13.13
1.82313	-1.82313	-0.866417	down	ACTA2-AS1	ACTA2 antisense RNA 1	Homo sapiens ACTA2 antisense RNA 1 (ACTA2-AS1), long non-coding RNA [NR_125373]	chr10:90695134-90695193	hs|10q23.31
1.82269	1.82269	0.866069	up	lnc-CST8-3	lnc-CST8-3:1	AGENCOURT_13778607 NIH_MGC_184 Homo sapiens cDNA clone IMAGE:30352934 5', mRNA sequence [CB959096]	chr20:23785227-23785875	hs|20p11.21
1.82248	-1.82248	-0.865904	down	PTPRK	protein tyrosine phosphatase, receptor type, K	PREDICTED: Homo sapiens protein tyrosine phosphatase, receptor type, K (PTPRK), transcript variant X11, mRNA [XM_006715539]	chr6:128321485-128321426	hs|6q22.33
1.8224	1.8224	0.865843	up	LINC01198	long intergenic non-protein coding RNA 1198	long intergenic non-protein coding RNA 1198 [Source:HGNC Symbol;Acc:HGNC:49598] [ENST00000595532]	chr13:64406580-64406521	hs|13q21.31
1.82184	-1.82184	-0.865396	down	SREBF1	sterol regulatory element binding transcription factor 1	Homo sapiens sterol regulatory element binding transcription factor 1 (SREBF1), transcript variant 1, mRNA [NM_001005291]	chr17:17715478-17715419	hs|17p11.2
1.8218	1.8218	0.865361	up	OR1C1	olfactory receptor, family 1, subfamily C, member 1	Homo sapiens olfactory receptor, family 1, subfamily C, member 1 (OR1C1), mRNA [NM_012353]	chr1:247921066-247921007	hs|1q44
1.82135	-1.82135	-0.865008	down	SYTL2	synaptotagmin-like 2	Homo sapiens synaptotagmin-like 2 (SYTL2), transcript variant a, mRNA [NM_032943]	chr11:85406136-85406077	hs|11q14.1
1.82002	1.82002	0.863951	up	LINC00469	long intergenic non-protein coding RNA 469	long intergenic non-protein coding RNA 469 [Source:HGNC Symbol;Acc:HGNC:26863] [ENST00000321800]	chr17:71746683-71746624	hs|17q25.1
1.81995	-1.81995	-0.863902	down	LOC730961	uncharacterized LOC730961	Homo sapiens cDNA clone IMAGE:4826905. [BC034282]	chr5:133563450-133563509	hs|5q31.1
1.81984	1.81984	0.863808	up	MT1A	metallothionein 1A	Homo sapiens metallothionein 1A (MT1A), mRNA [NM_005946]	chr16:56673205-56673808	hs|16q12.2
1.81928	1.81928	0.863368	up	APOL6	apolipoprotein L, 6	Homo sapiens apolipoprotein L, 6 (APOL6), mRNA [NM_030641]	chr22:36063762-36063821	hs|22q12.3
1.81901	-1.81901	-0.863156	down	TMBIM4	transmembrane BAX inhibitor motif containing 4	Homo sapiens cDNA FLJ45352 fis, clone BRHIP3012185. [AK127285]	chr12:66537065-66537006	hs|12q14.3
1.81877	1.81877	0.862966	up	PHLPP2	PH domain and leucine rich repeat protein phosphatase 2	Homo sapiens PH domain and leucine rich repeat protein phosphatase 2 (PHLPP2), transcript variant 2, mRNA [NM_001289003]	chr16:71686757-71686698	hs|16q22.2
1.81856	1.81856	0.862797	up	SPAG6	sperm associated antigen 6	Homo sapiens sperm associated antigen 6 (SPAG6), transcript variant 2, mRNA [NM_172242]	chr10:22705778-22705837	hs|10p12.2
1.81845	-1.81845	-0.862711	down	ACTA2	actin, alpha 2, smooth muscle, aorta	Homo sapiens actin, alpha 2, smooth muscle, aorta (ACTA2), transcript variant 2, mRNA [NM_001613]	chr10:90697958-90697899	hs|10q23.31
1.81806	1.81806	0.862398	up	AMTN	amelotin	Homo sapiens amelotin (AMTN), transcript variant 1, mRNA [NM_212557]	chr4:71398396-71398455	hs|4q13.3
1.8178	1.8178	0.862194	up	USP41	ubiquitin specific peptidase 41	ubiquitin specific peptidase 41 [Source:HGNC Symbol;Acc:HGNC:20070] [ENST00000454608]	chr22:20723843-20723784	hs|22q11.21
1.81731	-1.81731	-0.861805	down	lnc-NDFIP2-2	lnc-NDFIP2-2:3	Homo sapiens cDNA FLJ11334 fis, clone PLACE1010629. [AK002196]	chr13:79996559-79996618	hs|13q31.1
1.81722	-1.81722	-0.861733	down	TRIM58	tripartite motif containing 58	Homo sapiens tripartite motif containing 58 (TRIM58), mRNA [NM_015431]	chr1:248043359-248043418	hs|1q44
1.81649	-1.81649	-0.861155	down	GPR124	G protein-coupled receptor 124	Homo sapiens G protein-coupled receptor 124 (GPR124), mRNA [NM_032777]	chr8:37701268-37701327	hs|8p11.23
1.81629	1.81629	0.860992	up	C2orf83	chromosome 2 open reading frame 83	Homo sapiens chromosome 2 open reading frame 83 (C2orf83), transcript variant 1, mRNA [NM_020161]	chr2:228475433-228475374	hs|2q36.3
1.81601	1.81601	0.860773	up	WI2-2373I1.2	forkhead box L1-like	Homo sapiens forkhead box L1-like (WI2-2373I1.2), mRNA [NM_001195127]	chr7:330137-330196	hs|7p22.3
1.81594	1.81594	0.860714	up	CACHD1	cache domain containing 1	Homo sapiens cache domain containing 1 (CACHD1), transcript variant 1, mRNA [NM_020925]	chr1:65157944-65158003	hs|1p31.3
1.81541	1.81541	0.860299	up	lnc-RP11-171N4.2.1-1	lnc-RP11-171N4.2.1-1:1	603071734F1 NIH_MGC_119 Homo sapiens cDNA clone IMAGE:5163609 5', mRNA sequence [BI519951]	chr4:157557755-157557696	hs|4q32.1
1.81516	1.81516	0.860094	up	LECT2	leukocyte cell-derived chemotaxin 2	Homo sapiens leukocyte cell-derived chemotaxin 2 (LECT2), mRNA [NM_002302]	chr5:135283121-135283062	hs|5q31.1
1.815	-1.815	-0.859969	down	GRASP	GRP1 (general receptor for phosphoinositides 1)-associated scaffold protein	Homo sapiens GRP1 (general receptor for phosphoinositides 1)-associated scaffold protein (GRASP), transcript variant 1, mRNA [NM_181711]	chr12:52409589-52409648	hs|12q13.13
1.81489	-1.81489	-0.859883	down	GSDMB	gasdermin B	Homo sapiens gasdermin B (GSDMB), transcript variant 3, mRNA [NM_001165958]	chr17:38060909-38060850	hs|17q12
1.8146	-1.8146	-0.859654	down	EVC2	Ellis van Creveld syndrome 2	Homo sapiens Ellis van Creveld syndrome 2 (EVC2), transcript variant 2, mRNA [NM_001166136]	chr4:5567065-5567006	hs|4p16.2
1.81424	-1.81424	-0.859367	down	NEDD9	neural precursor cell expressed, developmentally down-regulated 9	Homo sapiens neural precursor cell expressed, developmentally down-regulated 9 (NEDD9), transcript variant 2, mRNA [NM_182966]	chr6:11201273-11201214	hs|6p24.2
1.81393	-1.81393	-0.859116	down	AP1S2	adaptor-related protein complex 1, sigma 2 subunit	adaptor-related protein complex 1, sigma 2 subunit [Source:HGNC Symbol;Acc:HGNC:560] [ENST00000380291]	chrX:15850439-15850381	hs|Xp22.2
1.81372	-1.81372	-0.85895	down	LOC643549	uncharacterized LOC643549	Homo sapiens cDNA FLJ40606 fis, clone THYMU2011939. [AK097925]	chr20:44562798-44562739	hs|20q13.12
1.81363	1.81363	0.858877	up	TTN	titin	Homo sapiens titin (TTN), transcript variant IC, mRNA [NM_001267550]	chr2:179518214-179518155	hs|2q31.2
1.81301	1.81301	0.858383	up	CCDC181	coiled-coil domain containing 181	Homo sapiens coiled-coil domain containing 181 (CCDC181), transcript variant 2, mRNA [NM_021179]	chr1:169390697-169390638	hs|1q24.2
1.81284	-1.81284	-0.858253	down	JMJD7	jumonji domain containing 7	Homo sapiens jumonji domain containing 7 (JMJD7), mRNA [NM_001114632]	chr15:42129270-42129329	hs|15q15.1
1.81231	-1.81231	-0.857831	down	ZNF493	zinc finger protein 493	Homo sapiens zinc finger protein 493 (ZNF493), transcript variant 2, mRNA [NM_145326]	chr19:21591532-21591591	hs|19p12
1.81214	-1.81214	-0.857695	down	DVL1	dishevelled segment polarity protein 1	Homo sapiens dishevelled segment polarity protein 1 (DVL1), mRNA [NM_004421]	chr1:1271579-1271520	hs|1p36.33
1.81177	1.81177	0.857402	up	KRTAP9-9	keratin associated protein 9-9	Homo sapiens keratin associated protein 9-9 (KRTAP9-9), mRNA [NM_030975]	chr17:39412155-39412214	hs|17q21.2
1.81112	1.81112	0.856882	up	C8orf87	chromosome 8 open reading frame 87	Homo sapiens chromosome 8 open reading frame 87 (C8orf87), mRNA [NM_001242668]	chr8:94146582-94146523	hs|8q22.1
1.81086	-1.81086	-0.856673	down	MMP24	matrix metallopeptidase 24 (membrane-inserted)	Homo sapiens matrix metallopeptidase 24 (membrane-inserted) (MMP24), mRNA [NM_006690]	chr20:33864708-33864767	hs|20q11.22
1.81078	-1.81078	-0.856609	down	AHNAK2	AHNAK nucleoprotein 2	Homo sapiens AHNAK nucleoprotein 2 (AHNAK2), mRNA [NM_138420]	chr14:105404612-105404553	hs|14q32.33
1.81065	-1.81065	-0.856511	down	lnc-NUB1-1	lnc-NUB1-1:5	LNCipedia lincRNA (lnc-NUB1-1), lincRNA [lnc-NUB1-1:5]	chr7:151110634-151110693	hs|7q36.1
1.81037	1.81037	0.856281	up	NOVA1	neuro-oncological ventral antigen 1	Homo sapiens neuro-oncological ventral antigen 1 (NOVA1), transcript variant 1, mRNA [NM_002515]	chr14:26915179-26915120	hs|14q12
1.80982	-1.80982	-0.855847	down	FHL1	four and a half LIM domains 1	Homo sapiens four and a half LIM domains 1 (FHL1), transcript variant 4, mRNA [NM_001159704]	chrX:135293033-135293092	hs|Xq26.3
1.80977	-1.80977	-0.855806	down	CSRP1	cysteine and glycine-rich protein 1	cysteine and glycine-rich protein 1 [Source:HGNC Symbol;Acc:HGNC:2469] [ENST00000533402]	chr1:201455042-201454983	hs|1q32.1
1.80948	1.80948	0.855573	up	TMEM255B	transmembrane protein 255B	transmembrane protein 255B [Source:HGNC Symbol;Acc:HGNC:28297] [ENST00000375353]	chr13:114515136-114515195	hs|13q34
1.80927	-1.80927	-0.855405	down	TMEM14E	transmembrane protein 14E	Homo sapiens transmembrane protein 14E (TMEM14E), mRNA [NM_001123228]	chr3:152058482-152058423	hs|3q25.1
1.80871	1.80871	0.854964	up	THEG5	testis highly expressed protein 5	Homo sapiens testis highly expressed protein 5 (THEG5), transcript variant 4, mRNA [NM_001278577]	chr19:32083841-32083900	hs|19q12
1.8082	-1.8082	-0.854557	down	lnc-SLC29A4-1	lnc-SLC29A4-1:1	LNCipedia lincRNA (lnc-SLC29A4-1), lincRNA [lnc-SLC29A4-1:1]	chr7:5460273-5460332	hs|7p22.1
1.808	-1.808	-0.854396	down	STARD10	StAR-related lipid transfer (START) domain containing 10	Homo sapiens StAR-related lipid transfer (START) domain containing 10 (STARD10), mRNA [NM_006645]	chr11:72468822-72466750	hs|11q13.4
1.80766	-1.80766	-0.854123	down	NEDD9	neural precursor cell expressed, developmentally down-regulated 9	Homo sapiens neural precursor cell expressed, developmentally down-regulated 9 (NEDD9), transcript variant 1, mRNA [NM_006403]	chr6:11184702-11184643	hs|6p24.2
1.80694	1.80694	0.853545	up	WDR72	WD repeat domain 72	Homo sapiens WD repeat domain 72 (WDR72), transcript variant 1, mRNA [NM_182758]	chr15:53806040-53805981	hs|15q21.3
1.80682	1.80682	0.853454	up	DEFB112	defensin, beta 112	Homo sapiens defensin, beta 112 (DEFB112), mRNA [NM_001037498]	chr6:50011349-50011290	hs|6p12.3
1.80647	1.80647	0.853173	up	LOC101927668	uncharacterized LOC101927668	Homo sapiens uncharacterized LOC101927668 (LOC101927668), long non-coding RNA [NR_110114]	chr7:19958800-19958741	hs|7p21.1
1.80604	1.80604	0.85283	up	FAM83H	family with sequence similarity 83, member H	Homo sapiens family with sequence similarity 83, member H (FAM83H), mRNA [NM_198488]	chr8:144806611-144806552	hs|8q24.3
1.80558	-1.80558	-0.852465	down	LOC101060091	uncharacterized LOC101060091	Homo sapiens uncharacterized LOC101060091 (LOC101060091), long non-coding RNA [NR_110174]	chr2:114588831-114588772	hs|2q14.1
1.80556	-1.80556	-0.852446	down	DZIP1L	DAZ interacting zinc finger protein 1-like	Homo sapiens DAZ interacting zinc finger protein 1-like (DZIP1L), transcript variant 1, mRNA [NM_173543]	chr3:137780951-137780892	hs|3q22.3
1.80519	-1.80519	-0.852147	down	SNAPC3	small nuclear RNA activating complex, polypeptide 3, 50kDa	small nuclear RNA activating complex, polypeptide 3, 50kDa [Source:HGNC Symbol;Acc:HGNC:11136] [ENST00000380799]	chr9:15453352-15453411	hs|9p22.3
1.80472	-1.80472	-0.851774	down	BNC2	basonuclin 2	Homo sapiens basonuclin 2 (BNC2), mRNA [NM_017637]	chr9:16409646-16409587	hs|9p22.3
1.80458	-1.80458	-0.851667	down	MTCL1	microtubule crosslinking factor 1	Homo sapiens microtubule crosslinking factor 1 (MTCL1), mRNA [NM_015210]	chr18:8831943-8832002	hs|18p11.22
1.80431	1.80431	0.85145	up	TRIM9	tripartite motif containing 9	Homo sapiens tripartite motif containing 9 (TRIM9), transcript variant 1, mRNA [NM_015163]	chr14:51448600-51448541	hs|14q22.1
1.80388	-1.80388	-0.851104	down	C1orf145	chromosome 1 open reading frame 145	Homo sapiens chromosome 1 open reading frame 145 (C1orf145), transcript variant 2, long non-coding RNA [NR_073155]	chr1:228391363-228391304	hs|1q42.13
1.80383	-1.80383	-0.851064	down	LOC653602	uncharacterized LOC653602	Homo sapiens uncharacterized LOC653602 (LOC653602), mRNA [NM_001291410]	chr2:14790452-14790511	hs|2p24.3
1.80382	1.80382	0.851057	up	ZNF584	zinc finger protein 584	Homo sapiens zinc finger protein 584 (ZNF584), mRNA [NM_173548]	chr19:58929400-58929459	hs|19q13.43
1.8035	1.8035	0.850799	up	LOC646743	uncharacterized LOC646743	Homo sapiens clone TESTIS-608 mRNA sequence. [AY726562]	chr2:131296727-131296668	hs|2q21.1
1.80346	1.80346	0.850767	up	LOC102723661	uncharacterized LOC102723661	Homo sapiens uncharacterized LOC102723661 (LOC102723661), long non-coding RNA [NR_125991]	chr1:96488331-96488390	hs|1p21.3
1.80313	-1.80313	-0.850507	down	IER5L	immediate early response 5-like	Homo sapiens immediate early response 5-like (IER5L), mRNA [NM_203434]	chr9:131937927-131937868	hs|9q34.11
1.80307	1.80307	0.850459	up	RAC2	ras-related C3 botulinum toxin substrate 2 (rho family, small GTP binding protein Rac2)	Homo sapiens ras-related C3 botulinum toxin substrate 2 (rho family, small GTP binding protein Rac2) (RAC2), mRNA [NM_002872]	chr22:37621511-37621452	hs|22q13.1
1.80272	1.80272	0.850176	up	TMEM171	transmembrane protein 171	Homo sapiens transmembrane protein 171 (TMEM171), transcript variant 1, mRNA [NM_173490]	chr5:72424286-72424345	hs|5q13.2
1.80234	1.80234	0.849872	up	DDB1	damage-specific DNA binding protein 1, 127kDa	damage-specific DNA binding protein 1, 127kDa [Source:HGNC Symbol;Acc:HGNC:2717] [ENST00000545894]	chr11:61069694-61069635	hs|11q12.2
1.80231	-1.80231	-0.849846	down	SPATA2	spermatogenesis associated 2	Homo sapiens spermatogenesis associated 2 (SPATA2), transcript variant 1, mRNA [NM_006038]	chr20:48520440-48520381	hs|20q13.13
1.80191	1.80191	0.849525	up	LOC100507191	uncharacterized LOC100507191	PREDICTED: Homo sapiens uncharacterized LOC100507191 (LOC100507191), misc_RNA [XR_158920]	chr17:73817402-73817343	hs|17q25.1
1.80178	-1.80178	-0.849421	down	CCNYL1	cyclin Y-like 1	Homo sapiens cyclin Y-like 1 (CCNYL1), transcript variant 2, mRNA [NM_152523]	chr2:208619020-208619079	hs|2q33.3
1.8017	1.8017	0.849363	up	FGFBP2	fibroblast growth factor binding protein 2	Homo sapiens fibroblast growth factor binding protein 2 (FGFBP2), mRNA [NM_031950]	chr4:15964292-15964233	hs|4p15.32
1.80158	-1.80158	-0.849262	down	THEMIS	thymocyte selection associated	Homo sapiens thymocyte selection associated (THEMIS), transcript variant 1, mRNA [NM_001164685]	chr6:128030471-128030412	hs|6q22.33
1.80127	1.80127	0.849011	up	STATH	statherin	Homo sapiens statherin (STATH), transcript variant 1, mRNA [NM_003154]	chr4:70867943-70868002	hs|4q13.3
1.80079	-1.80079	-0.848629	down	SLC43A1	solute carrier family 43 (amino acid system L transporter), member 1	Homo sapiens solute carrier family 43 (amino acid system L transporter), member 1 (SLC43A1), transcript variant 1, mRNA [NM_003627]	chr11:57252360-57252301	hs|11q12.1
1.80073	-1.80073	-0.848581	down	MYO1D	myosin ID	Homo sapiens myosin ID (MYO1D), transcript variant 1, mRNA [NM_015194]	chr17:30819891-30819832	hs|17q11.2
1.80072	-1.80072	-0.848573	down	ERCC5	excision repair cross-complementation group 5	excision repair cross-complementation group 5 [Source:HGNC Symbol;Acc:HGNC:3437] [ENST00000375958]	chr13:103506205-103506264	hs|13q33.1
1.80067	1.80067	0.848533	up	SLC9B1	solute carrier family 9, subfamily B (NHA1, cation proton antiporter 1), member 1	Homo sapiens solute carrier family 9, subfamily B (NHA1, cation proton antiporter 1), member 1 (SLC9B1), transcript variant 2, mRNA [NM_001100874]	chr4:103867842-103866458	hs|4q24
1.80051	1.80051	0.848402	up	lnc-EGLN1-1	lnc-EGLN1-1:1	LNCipedia lincRNA (lnc-EGLN1-1), lincRNA [lnc-EGLN1-1:1]	chr1:231664197-231663134	hs|1q42.2
1.80032	1.80032	0.848252	up	PPARGC1A	peroxisome proliferator-activated receptor gamma, coactivator 1 alpha	Homo sapiens peroxisome proliferator-activated receptor gamma, coactivator 1 alpha (PPARGC1A), mRNA [NM_013261]	chr4:23793996-23793937	hs|4p15.2
1.79998	-1.79998	-0.847978	down	LOC400684	uncharacterized LOC400684	Homo sapiens uncharacterized LOC400684 (LOC400684), long non-coding RNA [NR_046201]	chr19:32881074-32881015	hs|19q13.11
1.79989	1.79989	0.847907	up	MED12L	mediator complex subunit 12-like	mediator complex subunit 12-like [Source:HGNC Symbol;Acc:HGNC:16050] [ENST00000309237]	chr3:150910377-150910436	hs|3q25.1
1.79913	-1.79913	-0.847296	down	FANCA	Fanconi anemia, complementation group A	Homo sapiens Fanconi anemia, complementation group A (FANCA), transcript variant 1, mRNA [NM_000135]	chr16:89804072-89804013	hs|16q24.3
1.79902	-1.79902	-0.847213	down	DOPEY2	dopey family member 2	Homo sapiens dopey family member 2 (DOPEY2), mRNA [NM_005128]	chr21:37664494-37665639	hs|21q22.12
1.79846	1.79846	0.846758	up	C1orf87	chromosome 1 open reading frame 87	Homo sapiens chromosome 1 open reading frame 87 (C1orf87), mRNA [NM_152377]	chr1:60456377-60456318	hs|1p32.1
1.79829	-1.79829	-0.846629	down	ARMC9	armadillo repeat containing 9	Homo sapiens armadillo repeat containing 9 (ARMC9), transcript variant 2, mRNA [NM_025139]	chr2:232209808-232209867	hs|2q37.1
1.79826	-1.79826	-0.846599	down	FAM198B	family with sequence similarity 198, member B	Homo sapiens family with sequence similarity 198, member B (FAM198B), transcript variant 2, mRNA [NM_016613]	chr4:159046215-159046156	hs|4q32.1
1.79812	-1.79812	-0.846488	down	C6orf132	chromosome 6 open reading frame 132	Homo sapiens chromosome 6 open reading frame 132 (C6orf132), mRNA [NM_001164446]	chr6:42096495-42096436	hs|6p21.1
1.79771	1.79771	0.846163	up	HLA-DPB1	major histocompatibility complex, class II, DP beta 1	Homo sapiens major histocompatibility complex, class II, DP beta 1 (HLA-DPB1), mRNA [NM_002121]	chr6:33054359-33054418	hs|6p21.32
1.79623	1.79623	0.844972	up	MMP25	matrix metallopeptidase 25	Homo sapiens matrix metallopeptidase 25 (MMP25), mRNA [NM_022468]	chr16:3110418-3110477	hs|16p13.3
1.7962	-1.7962	-0.844945	down	SPIN4	spindlin family, member 4	Homo sapiens spindlin family, member 4 (SPIN4), mRNA [NM_001012968]	chrX:62567175-62567116	hs|Xq11.1
1.79592	1.79592	0.844721	up	TRIB3	tribbles pseudokinase 3	Homo sapiens tribbles pseudokinase 3 (TRIB3), transcript variant 1, mRNA [NM_021158]	chr20:378107-378166	hs|20p13
1.7957	-1.7957	-0.844546	down	COL4A2	collagen, type IV, alpha 2	Homo sapiens collagen, type IV, alpha 2 (COL4A2), mRNA [NM_001846]	chr13:111165261-111165320	hs|13q34
1.7955	1.7955	0.844383	up	SLAMF6	SLAM family member 6	Homo sapiens SLAM family member 6 (SLAMF6), transcript variant 2, mRNA [NM_052931]	chr1:160455780-160455721	hs|1q23.2
1.79545	-1.79545	-0.844347	down	RBP2	retinol binding protein 2, cellular	Homo sapiens retinol binding protein 2, cellular (RBP2), mRNA [NM_004164]	chr3:139181046-139180987	hs|3q23
1.79532	1.79532	0.844243	up	SLC16A10	solute carrier family 16 (aromatic amino acid transporter), member 10	Homo sapiens solute carrier family 16 (aromatic amino acid transporter), member 10 (SLC16A10), mRNA [NM_018593]	chr6:111498808-111498867	hs|6q21
1.79524	-1.79524	-0.844179	down	TLE1	transducin-like enhancer of split 1 (E(sp1) homolog, Drosophila)	transducin-like enhancer of split 1 (E(sp1) homolog, Drosophila) [Source:HGNC Symbol;Acc:HGNC:11837] [ENST00000376463]	chr9:84248423-84248384	hs|9q21.32
1.79486	-1.79486	-0.843873	down	THBS1	thrombospondin 1	Homo sapiens thrombospondin 1 (THBS1), mRNA [NM_003246]	chr15:39874546-39874605	hs|15q14
1.79485	-1.79485	-0.843864	down	LOC728715	ovostatin homolog 2-like	PREDICTED: Homo sapiens ovostatin (OVOS), mRNA [XM_006719176]	chr12:9711895-9712715	hs|12p13.31
1.79447	-1.79447	-0.843554	down	PKIG	protein kinase (cAMP-dependent, catalytic) inhibitor gamma	Homo sapiens protein kinase (cAMP-dependent, catalytic) inhibitor gamma (PKIG), transcript variant 1, mRNA [NM_181805]	chr20:43246977-43247036	hs|20q13.12
1.79421	1.79421	0.843346	up	GRIN2A	glutamate receptor, ionotropic, N-methyl D-aspartate 2A	Homo sapiens glutamate receptor, ionotropic, N-methyl D-aspartate 2A (GRIN2A), transcript variant 1, mRNA [NM_001134407]	chr16:9847441-9847382	hs|16p13.2
1.7941	1.7941	0.84326	up	HSD11B1	hydroxysteroid (11-beta) dehydrogenase 1	Homo sapiens hydroxysteroid (11-beta) dehydrogenase 1 (HSD11B1), transcript variant 2, mRNA [NM_181755]	chr1:209907901-209907960	hs|1q32.2
1.79368	-1.79368	-0.842926	down	CST6	cystatin E/M	Homo sapiens cystatin E/M (CST6), mRNA [NM_001323]	chr11:65780838-65780897	hs|11q13.1
1.79319	1.79319	0.842525	up	LRRTM4	leucine rich repeat transmembrane neuronal 4	Homo sapiens leucine rich repeat transmembrane neuronal 4 (LRRTM4), transcript variant 2, mRNA [NM_024993]	chr2:77744277-77744218	hs|2p12
1.79246	-1.79246	-0.841938	down	NTM	neurotrimin	Homo sapiens neurotrimin (NTM), transcript variant 4, mRNA [NM_001144059]	chr11:132184901-132184960	hs|11q25
1.79138	-1.79138	-0.841069	down	LOC100127994	uncharacterized LOC100127994	Homo sapiens cDNA FLJ45631 fis, clone CHONS2001797. [AK127538]	chr18:77257017-77257076	hs|18q23
1.78936	-1.78936	-0.839441	down	ZNF184	zinc finger protein 184	Homo sapiens zinc finger protein 184 (ZNF184), mRNA [NM_007149]	chr6:27419044-27418985	hs|6p22.1
1.78911	-1.78911	-0.83924	down	FBLN7	fibulin 7	Homo sapiens fibulin 7 (FBLN7), transcript variant 1, mRNA [NM_153214]	chr2:112945026-112945085	hs|2q13
1.78902	1.78902	0.83917	up	PDE4B	phosphodiesterase 4B, cAMP-specific	Homo sapiens phosphodiesterase 4B, cAMP-specific (PDE4B), transcript variant d, mRNA [NM_001037341]	chr1:66839789-66839848	hs|1p31.3
1.78892	-1.78892	-0.839088	down	MAGEB16	melanoma antigen family B, 16	Homo sapiens melanoma antigen family B, 16 (MAGEB16), mRNA [NM_001099921]	chrX:35821793-35821852	hs|Xp21.1
1.7889	1.7889	0.83907	up	KLRC3	killer cell lectin-like receptor subfamily C, member 3	Homo sapiens killer cell lectin-like receptor subfamily C, member 3 (KLRC3), transcript variant 2, mRNA [NM_007333]	chr12:10569289-10568358	hs|12p13.2
1.78875	-1.78875	-0.838955	down	CCDC68	coiled-coil domain containing 68	Homo sapiens coiled-coil domain containing 68 (CCDC68), transcript variant 1, mRNA [NM_025214]	chr18:52568911-52568852	hs|18q21.2
1.78771	-1.78771	-0.838116	down	BACH2	BTB and CNC homology 1, basic leucine zipper transcription factor 2	Homo sapiens BTB and CNC homology 1, basic leucine zipper transcription factor 2 (BACH2), transcript variant 1, mRNA [NM_021813]	chr6:90636664-90636605	hs|6q15
1.78727	1.78727	0.83776	up	SH3KBP1	SH3-domain kinase binding protein 1	Homo sapiens SH3-domain kinase binding protein 1 (SH3KBP1), transcript variant 2, mRNA [NM_001024666]	chrX:19554143-19554084	hs|Xp22.12
1.78719	1.78719	0.837692	up	STXBP6	syntaxin binding protein 6 (amisyn)	Homo sapiens syntaxin binding protein 6 (amisyn) (STXBP6), mRNA [NM_014178]	chr14:25288249-25281886	hs|14q12
1.78712	1.78712	0.837639	up	HFM1	HFM1, ATP-dependent DNA helicase homolog (S. cerevisiae)	Homo sapiens HFM1, ATP-dependent DNA helicase homolog (S. cerevisiae) (HFM1), mRNA [NM_001017975]	chr1:91727946-91727887	hs|1p22.2
1.78685	1.78685	0.83742	up	LOC101927902	uncharacterized LOC101927902	PREDICTED: Homo sapiens uncharacterized LOC101927902 (LOC101927902), ncRNA [XR_242326]	chr7:104581976-104582035	hs|7q22.3
1.78585	-1.78585	-0.836607	down	GBP2	guanylate binding protein 2, interferon-inducible	Homo sapiens guanylate binding protein 2, interferon-inducible (GBP2), mRNA [NM_004120]	chr1:89578160-89575896	hs|1p22.2
1.78568	1.78568	0.836473	up	LOC286178	uncharacterized LOC286178	PREDICTED: Homo sapiens uncharacterized LOC286178 (LOC286178), misc_RNA [XR_108909]	chr8:58662668-58662727	hs|8q12.1
1.78559	-1.78559	-0.836403	down	IGF2	insulin-like growth factor 2	Homo sapiens insulin-like growth factor 2 (IGF2), transcript variant 1, mRNA [NM_000612]	chr11:2150453-2150394	hs|11p15.5
1.78547	1.78547	0.836302	up	AKR1B10	aldo-keto reductase family 1, member B10 (aldose reductase)	Homo sapiens aldo-keto reductase family 1, member B10 (aldose reductase) (AKR1B10), mRNA [NM_020299]	chr7:134225799-134225858	hs|7q33
1.7849	-1.7849	-0.835844	down	LOC102467223	uncharacterized LOC102467223	Homo sapiens uncharacterized LOC102467223 (LOC102467223), long non-coding RNA [NR_104678]	chr5:116096439-116096380	hs|5q23.1
1.78479	-1.78479	-0.835754	down	lnc-AC092295.7.1-1	lnc-AC092295.7.1-1:1	601845292F1 NIH_MGC_55 Homo sapiens cDNA clone IMAGE:4070471 5', mRNA sequence [BF213506]	chr19:37026078-37026137	hs|19q13.12
1.78477	1.78477	0.835741	up	MMD	monocyte to macrophage differentiation-associated	Homo sapiens monocyte to macrophage differentiation-associated (MMD), mRNA [NM_012329]	chr17:53470223-53470164	hs|17q22
1.78464	-1.78464	-0.835634	down	P2RX2	purinergic receptor P2X, ligand gated ion channel, 2	Homo sapiens purinergic receptor P2X, ligand gated ion channel, 2 (P2RX2), transcript variant 4, mRNA [NM_170683]	chr12:133198203-133198262	hs|12q24.33
1.78458	1.78458	0.835582	up	TMEM191B	transmembrane protein 191B	Homo sapiens transmembrane protein 191B (TMEM191B), mRNA [NM_001242313]	chr22:20377699-20377758	hs|22q11.21
1.78443	1.78443	0.835467	up	DRD1	dopamine receptor D1	Homo sapiens dopamine receptor D1 (DRD1), mRNA [NM_000794]	chr5:174868145-174868086	hs|5q35.2
1.78427	-1.78427	-0.835334	down	ZNF608	zinc finger protein 608	Homo sapiens zinc finger protein 608 (ZNF608), mRNA [NM_020747]	chr5:123973545-123973486	hs|5q23.2
1.78423	1.78423	0.835301	up	CNIH2	cornichon family AMPA receptor auxiliary protein 2	Homo sapiens cornichon family AMPA receptor auxiliary protein 2 (CNIH2), transcript variant 1, mRNA [NM_182553]	chr11:66050597-66050756	hs|11q13.2
1.78399	-1.78399	-0.835106	down	LOC441178	uncharacterized LOC441178	Homo sapiens uncharacterized LOC441178 (LOC441178), long non-coding RNA [NR_117092]	chr6:168081060-168081001	hs|6q27
1.78319	-1.78319	-0.834463	down	SBNO2	strawberry notch homolog 2 (Drosophila)	Homo sapiens strawberry notch homolog 2 (Drosophila) (SBNO2), transcript variant 1, mRNA [NM_014963]	chr19:1108327-1108268	hs|19p13.3
1.78298	1.78298	0.834288	up	TSPAN33	tetraspanin 33	Homo sapiens tetraspanin 33 (TSPAN33), mRNA [NM_178562]	chr7:128808242-128808301	hs|7q32.1
1.78241	1.78241	0.833826	up	ABCC2	ATP-binding cassette, sub-family C (CFTR/MRP), member 2	Homo sapiens ATP-binding cassette, sub-family C (CFTR/MRP), member 2 (ABCC2), mRNA [NM_000392]	chr10:101611322-101611381	hs|10q24.2
1.78209	1.78209	0.833568	up	STEAP2	STEAP family member 2, metalloreductase	Homo sapiens STEAP family member 2, metalloreductase (STEAP2), transcript variant 1, mRNA [NM_152999]	chr7:89866537-89866596	hs|7q21.13
1.78177	-1.78177	-0.833313	down	NFYB	nuclear transcription factor Y, beta	Homo sapiens nuclear transcription factor Y, beta (NFYB), mRNA [NM_006166]	chr12:104511944-104511885	hs|12q23.3
1.78146	1.78146	0.833059	up	PIH1D2	PIH1 domain containing 2	Homo sapiens PIH1 domain containing 2 (PIH1D2), transcript variant 1, mRNA [NM_138789]	chr11:111941220-111941161	hs|11q23.1
1.78118	-1.78118	-0.832835	down	CORO1A	coronin, actin binding protein, 1A	Homo sapiens coronin, actin binding protein, 1A (CORO1A), transcript variant 2, mRNA [NM_007074]	chr16:30199317-30199376	hs|16p11.2
1.78061	-1.78061	-0.832374	down	ADAMTS10	ADAM metallopeptidase with thrombospondin type 1 motif, 10	Homo sapiens ADAM metallopeptidase with thrombospondin type 1 motif, 10 (ADAMTS10), transcript variant 1, mRNA [NM_030957]	chr19:8645185-8645126	hs|19p13.2
1.7805	-1.7805	-0.832282	down	SMCHD1	structural maintenance of chromosomes flexible hinge domain containing 1	Homo sapiens structural maintenance of chromosomes flexible hinge domain containing 1 (SMCHD1), mRNA [NM_015295]	chr18:2804753-2804812	hs|18p11.32
1.78045	-1.78045	-0.832243	down	GPR21	G protein-coupled receptor 21	Homo sapiens G protein-coupled receptor 21 (GPR21), mRNA [NM_005294]	chr9:125797459-125797518	hs|9q33.2
1.78035	-1.78035	-0.832162	down	PPP1R12B	protein phosphatase 1, regulatory subunit 12B	Homo sapiens protein phosphatase 1, regulatory subunit 12B (PPP1R12B), transcript variant 1, mRNA [NM_002481]	chr1:202533610-202533669	hs|1q32.1
1.78033	1.78033	0.832145	up	PEX5L	peroxisomal biogenesis factor 5-like	Homo sapiens peroxisomal biogenesis factor 5-like (PEX5L), transcript variant 1, mRNA [NM_016559]	chr3:179518364-179518305	hs|3q26.33
1.78015	1.78015	0.831995	up	LOC497256	uncharacterized LOC497256	Homo sapiens cDNA FLJ37669 fis, clone BRHIP2011891. [AK094988]	chr9:90459517-90459458	hs|9q22.1
1.78011	-1.78011	-0.831962	down	ZNF608	zinc finger protein 608	Homo sapiens zinc finger protein 608 (ZNF608), mRNA [NM_020747]	chr5:123979277-123979218	hs|5q23.2
1.77989	-1.77989	-0.831786	down	C4orf46	chromosome 4 open reading frame 46	Homo sapiens chromosome 4 open reading frame 46 (C4orf46), transcript variant 1, mRNA [NM_001008393]	chr4:159587916-159587857	hs|4q32.1
1.77978	-1.77978	-0.8317	down	ADAMTSL3	ADAMTS-like 3	Homo sapiens ADAMTS-like 3 (ADAMTSL3), transcript variant 1, mRNA [NM_207517]	chr15:84506937-84527546	hs|15q25.2
1.77965	-1.77965	-0.831591	down	KCNK6	potassium channel, two pore domain subfamily K, member 6	Homo sapiens potassium channel, two pore domain subfamily K, member 6 (KCNK6), mRNA [NM_004823]	chr19:38818817-38818876	hs|19q13.2
1.77921	1.77921	0.831239	up	AOX1	aldehyde oxidase 1	Homo sapiens aldehyde oxidase 1 (AOX1), mRNA [NM_001159]	chr2:201535624-201535683	hs|2q33.1
1.77914	1.77914	0.831181	up	TMEM100	transmembrane protein 100	Homo sapiens transmembrane protein 100 (TMEM100), transcript variant 2, mRNA [NM_018286]	chr17:53797818-53797759	hs|17q22
1.77887	-1.77887	-0.830958	down	CES5A	carboxylesterase 5A	Homo sapiens carboxylesterase 5A (CES5A), transcript variant 2, mRNA [NM_145024]	chr16:55899994-55899935	hs|16q12.2
1.77878	-1.77878	-0.830891	down	PHACTR2	phosphatase and actin regulator 2	Homo sapiens phosphatase and actin regulator 2 (PHACTR2), transcript variant 3, mRNA [NM_014721]	chr6:144146229-144146288	hs|6q24.2
1.77845	1.77845	0.830621	up	MINPP1	multiple inositol-polyphosphate phosphatase 1	Homo sapiens multiple inositol-polyphosphate phosphatase 1 (MINPP1), transcript variant 2, mRNA [NM_001178117]	chr10:89268187-89268246	hs|10q23.2
1.77824	-1.77824	-0.830454	down	SYT6	synaptotagmin VI	Homo sapiens synaptotagmin VI (SYT6), transcript variant 3, mRNA [NM_001270805]	chr1:114633192-114633133	hs|1p13.2
1.77672	-1.77672	-0.829216	down	PAIP2B	poly(A) binding protein interacting protein 2B	Homo sapiens poly(A) binding protein interacting protein 2B (PAIP2B), mRNA [NM_020459]	chr2:71417024-71415656	hs|2p13.3
1.776	1.776	0.828628	up	MCTP1	multiple C2 domains, transmembrane 1	Homo sapiens multiple C2 domains, transmembrane 1 (MCTP1), transcript variant L, mRNA [NM_024717]	chr5:94208929-94208870	hs|5q15
1.77591	-1.77591	-0.82856	down	KIF1A	kinesin family member 1A	Homo sapiens kinesin family member 1A (KIF1A), transcript variant 1, mRNA [NM_001244008]	chr2:241653244-241653185	hs|2q37.3
1.77573	-1.77573	-0.828416	down	AUTS2	autism susceptibility candidate 2	Homo sapiens autism susceptibility candidate 2 (AUTS2), transcript variant 1, mRNA [NM_015570]	chr7:70257414-70257473	hs|7q11.22
1.7757	-1.7757	-0.82839	down	LOC101928433	uncharacterized LOC101928433	PREDICTED: Homo sapiens uncharacterized LOC101928433 (LOC101928433), ncRNA [XR_241982]	chr6:16763019-16763078	hs|6p22.3
1.77532	-1.77532	-0.828078	down	CSF3	colony stimulating factor 3 (granulocyte)	Homo sapiens colony stimulating factor 3 (granulocyte) (CSF3), transcript variant 1, mRNA [NM_000759]	chr17:38173251-38173310	hs|17q21.1
1.77468	-1.77468	-0.82756	down	lnc-ZNF768-1	lnc-ZNF768-1:1	LNCipedia lincRNA (lnc-ZNF768-1), lincRNA [lnc-ZNF768-1:1]	chr16:30510299-30510240	hs|16p11.2
1.77456	-1.77456	-0.827459	down	WEE1	WEE1 G2 checkpoint kinase	Homo sapiens WEE1 G2 checkpoint kinase (WEE1), transcript variant 1, mRNA [NM_003390]	chr11:9611073-9611132	hs|11p15.4
1.77437	-1.77437	-0.827307	down	lnc-BLID-1	lnc-BLID-1:12	Q8TAW2_HUMAN (Q8TAW2) CD99L2 protein, partial (18%) [THC2520514]	chr11:121936739-121936680	hs|11q24.1
1.77402	1.77402	0.827026	up	LOC388813	uncharacterized protein ENSP00000383407-like	Homo sapiens uncharacterized protein ENSP00000383407-like (LOC388813), mRNA [NM_001256579]	chr21:15964554-15964495	hs|21q11.2
1.77351	1.77351	0.82661	up	OR9I1	olfactory receptor, family 9, subfamily I, member 1	Homo sapiens olfactory receptor, family 9, subfamily I, member 1 (OR9I1), mRNA [NM_001005211]	chr11:57886043-57885984	hs|11q12.1
1.77311	-1.77311	-0.826278	down	lnc-CALCOCO2-7	lnc-CALCOCO2-7:1	MR2-GN0158-091100-003-c12 GN0158 Homo sapiens cDNA, mRNA sequence [BF997934]	chr17:46637636-46637695	hs|17q21.32
1.77259	1.77259	0.82586	up	MYO3A	myosin IIIA	myosin IIIA [Source:HGNC Symbol;Acc:HGNC:7601] [ENST00000376302]	chr10:26312288-26312347	hs|10p12.1
1.77243	-1.77243	-0.82573	down	lnc-TRIML2-3	lnc-TRIML2-3:1	Q5VXS7_HUMAN (Q5VXS7) OTTHUMP00000018497, partial (16%) [THC2693181]	chr4:188534204-188534145	hs|4q35.2
1.77217	1.77217	0.825516	up	CCL5	chemokine (C-C motif) ligand 5	Homo sapiens chemokine (C-C motif) ligand 5 (CCL5), transcript variant 1, mRNA [NM_002985]	chr17:34199391-34199332	hs|17q12
1.77206	-1.77206	-0.825425	down	lnc-TMEM18-12	lnc-TMEM18-12:1	PREDICTED: Homo sapiens formin-like protein 16-like (LOC101060391), mRNA [XM_006710125]	chr2:945382-945323	hs|2p25.3
1.77187	-1.77187	-0.82527	down	GATSL2	GATS protein-like 2	Homo sapiens GATS protein-like 2 (GATSL2), mRNA [NM_001145064]	chr7:74803807-74803748	hs|7q11.23
1.77096	1.77096	0.824528	up	DGAT2	diacylglycerol O-acyltransferase 2	Homo sapiens diacylglycerol O-acyltransferase 2 (DGAT2), transcript variant 1, mRNA [NM_032564]	chr11:75511843-75511902	hs|11q13.5
1.77078	1.77078	0.824386	up	PASK	PAS domain containing serine/threonine kinase	Homo sapiens PAS domain containing serine/threonine kinase (PASK), transcript variant 2, mRNA [NM_015148]	chr2:242046815-242046127	hs|2q37.3
1.77042	-1.77042	-0.824094	down	FIBIN	fin bud initiation factor homolog (zebrafish)	Homo sapiens fin bud initiation factor homolog (zebrafish) (FIBIN), mRNA [NM_203371]	chr11:27018499-27018558	hs|11p14.2
1.76989	-1.76989	-0.823656	down	RNF150	ring finger protein 150	Homo sapiens ring finger protein 150 (RNF150), mRNA [NM_020724]	chr4:141787036-141786977	hs|4q31.21
1.76969	-1.76969	-0.8235	down	IGFBP5	insulin-like growth factor binding protein 5	Homo sapiens insulin-like growth factor binding protein 5 (IGFBP5), mRNA [NM_000599]	chr2:217537226-217537167	hs|2q35
1.76931	1.76931	0.823188	up	CHL1	cell adhesion molecule L1-like	Homo sapiens cell adhesion molecule L1-like (CHL1), transcript variant 1, mRNA [NM_006614]	chr3:450130-450189	hs|3p26.3
1.76923	-1.76923	-0.823124	down	FKBP9	FK506 binding protein 9, 63 kDa	FK506 binding protein 9, 63 kDa [Source:HGNC Symbol;Acc:HGNC:3725] [ENST00000485309]	chr7:33014750-33014809	hs|7p14.3
1.76911	1.76911	0.823021	up	IFNA7	interferon, alpha 7	Homo sapiens interferon, alpha 7 (IFNA7), mRNA [NM_021057]	chr9:21201536-21201477	hs|9p21.3
1.76896	-1.76896	-0.822901	down	PHACTR2	phosphatase and actin regulator 2	Homo sapiens phosphatase and actin regulator 2 (PHACTR2), transcript variant 1, mRNA [NM_001100164]	chr6:144151872-144151931	hs|6q24.2
1.76859	1.76859	0.822598	up	MMP25	matrix metallopeptidase 25	Homo sapiens matrix metallopeptidase 25 (MMP25), mRNA [NM_022468]	chr16:3100486-3100545	hs|16p13.3
1.76853	1.76853	0.82255	up	TLR3	toll-like receptor 3	Homo sapiens toll-like receptor 3 (TLR3), mRNA [NM_003265]	chr4:187005890-187005949	hs|4q35.1
1.76852	-1.76852	-0.822542	down	PKN3	protein kinase N3	Homo sapiens protein kinase N3 (PKN3), mRNA [NM_013355]	chr9:131483128-131483187	hs|9q34.11
1.76849	1.76849	0.822521	up	NCR3	natural cytotoxicity triggering receptor 3	Homo sapiens natural cytotoxicity triggering receptor 3 (NCR3), transcript variant 1, mRNA [NM_147130]	chr6:31556758-31556699	hs|6p21.33
1.7682	1.7682	0.822281	up	MILR1	mast cell immunoglobulin-like receptor 1	Homo sapiens mast cell immunoglobulin-like receptor 1 (MILR1), transcript variant S2, mRNA [NM_001291317]	chr17:62461517-62461576	hs|17q23.3
1.7681	1.7681	0.822197	up	TRIM49	tripartite motif containing 49	Homo sapiens tripartite motif containing 49 (TRIM49), mRNA [NM_020358]	chr11:89531619-89531560	hs|11q14.3
1.76786	1.76786	0.822007	up	PCSK4	proprotein convertase subtilisin/kexin type 4	Homo sapiens proprotein convertase subtilisin/kexin type 4 (PCSK4), mRNA [NM_017573]	chr19:1481487-1481428	hs|19p13.3
1.76786	-1.76786	-0.822002	down	COLQ	collagen-like tail subunit (single strand of homotrimer) of asymmetric acetylcholinesterase	Homo sapiens collagen-like tail subunit (single strand of homotrimer) of asymmetric acetylcholinesterase (COLQ), transcript variant II, mRNA [NM_080538]	chr3:15492044-15491985	hs|3p25.1
1.76687	-1.76687	-0.821192	down	CRISPLD1	cysteine-rich secretory protein LCCL domain containing 1	Homo sapiens cysteine-rich secretory protein LCCL domain containing 1 (CRISPLD1), transcript variant 3, mRNA [NM_001286778]	chr8:75946730-75946789	hs|8q21.11
1.76677	-1.76677	-0.821113	down	LOC100996535	collagen alpha-1(I) chain-like	PREDICTED: Homo sapiens collagen alpha-1(I) chain-like (LOC100996535), mRNA [XM_005275924]	chr2:97203863-97203922	hs|2q11.2
1.76601	1.76601	0.820494	up	PRSS3P2	protease, serine, 3 pseudogene 2	Homo sapiens protease, serine, 3 pseudogene 2 (PRSS3P2), non-coding RNA [NR_001296]	chr7:142482228-142482287	hs|7q34
1.76579	-1.76579	-0.820315	down	SLC14A1	solute carrier family 14 (urea transporter), member 1 (Kidd blood group)	Homo sapiens solute carrier family 14 (urea transporter), member 1 (Kidd blood group) (SLC14A1), transcript variant 4, mRNA [NM_001146037]	chr18:43329812-43329871	hs|18q12.3
1.76555	-1.76555	-0.820116	down	RNF148	ring finger protein 148	Homo sapiens ring finger protein 148 (RNF148), mRNA [NM_198085]	chr7:122342035-122341976	hs|7q31.32
1.76537	1.76537	0.819968	up	lnc-RP5-915N17.9.1-1	lnc-RP5-915N17.9.1-1:1	LNCipedia lincRNA (lnc-RP5-915N17.9.1-1), lincRNA [lnc-RP5-915N17.9.1-1:1]	chr1:229027257-229027198	hs|1q42.13
1.76525	1.76525	0.819871	up	EFR3B	EFR3 homolog B (S. cerevisiae)	Homo sapiens EFR3 homolog B (S. cerevisiae) (EFR3B), mRNA [NM_014971]	chr2:25378184-25378243	hs|2p23.3
1.765	1.765	0.81967	up	LOC101927934	uncharacterized LOC101927934	Homo sapiens uncharacterized LOC101927934 (LOC101927934), long non-coding RNA [NR_105045]	chr5:133842466-133842525	hs|5q31.1
1.76479	1.76479	0.819495	up	OR56B4	olfactory receptor, family 56, subfamily B, member 4	Homo sapiens olfactory receptor, family 56, subfamily B, member 4 (OR56B4), mRNA [NM_001005181]	chr11:6129817-6129876	hs|11p15.4
1.76459	-1.76459	-0.819334	down	SPARC	secreted protein, acidic, cysteine-rich (osteonectin)	Homo sapiens secreted protein, acidic, cysteine-rich (osteonectin) (SPARC), mRNA [NM_003118]	chr5:151041099-151041040	hs|5q33.1
1.76455	-1.76455	-0.819304	down	ZCCHC11	zinc finger, CCHC domain containing 11	zinc finger, CCHC domain containing 11 [Source:HGNC Symbol;Acc:HGNC:28981] [ENST00000371541]	chr1:52929446-52929387	hs|1p32.3
1.76412	1.76412	0.818945	up	APBB1IP	amyloid beta (A4) precursor protein-binding, family B, member 1 interacting protein	Homo sapiens amyloid beta (A4) precursor protein-binding, family B, member 1 interacting protein (APBB1IP), mRNA [NM_019043]	chr10:26789908-26789967	hs|10p12.1
1.76406	-1.76406	-0.818902	down	HIVEP3	human immunodeficiency virus type I enhancer binding protein 3	Homo sapiens human immunodeficiency virus type I enhancer binding protein 3 (HIVEP3), transcript variant 1, mRNA [NM_024503]	chr1:41975744-41975685	hs|1p34.2
1.76398	-1.76398	-0.818838	down	ZSCAN16	zinc finger and SCAN domain containing 16	Homo sapiens zinc finger and SCAN domain containing 16 (ZSCAN16), mRNA [NM_025231]	chr6:28097263-28097322	hs|6p22.1
1.76389	-1.76389	-0.818762	down	RPGR	retinitis pigmentosa GTPase regulator	Homo sapiens retinitis pigmentosa GTPase regulator (RPGR), transcript variant C, mRNA [NM_001034853]	chrX:38143761-38143702	hs|Xp11.4
1.76375	1.76375	0.818644	up	lnc-FAM182A-2	lnc-FAM182A-2:1	RST14851 Athersys RAGE Library Homo sapiens cDNA, mRNA sequence [BG195658]	chr20:26174519-26174578	hs|20p11.1
1.76362	-1.76362	-0.818539	down	NKAIN2	Na+/K+ transporting ATPase interacting 2	Homo sapiens Na+/K+ transporting ATPase interacting 2 (NKAIN2), transcript variant 1, mRNA [NM_001040214]	chr6:125146578-125146637	hs|6q22.31
1.76344	-1.76344	-0.818389	down	EML6	echinoderm microtubule associated protein like 6	Homo sapiens echinoderm microtubule associated protein like 6 (EML6), mRNA [NM_001039753]	chr2:55197718-55197777	hs|2p16.1
1.76328	-1.76328	-0.818261	down	NUAK1	NUAK family, SNF1-like kinase, 1	Homo sapiens NUAK family, SNF1-like kinase, 1 (NUAK1), mRNA [NM_014840]	chr12:106461136-106461077	hs|12q23.3
1.7628	1.7628	0.817869	up	KLK11	kallikrein-related peptidase 11	Homo sapiens kallikrein-related peptidase 11 (KLK11), transcript variant 2, mRNA [NM_144947]	chr19:51525685-51525626	hs|19q13.41
1.76242	-1.76242	-0.817555	down	ZSCAN31	zinc finger and SCAN domain containing 31	Homo sapiens zinc finger and SCAN domain containing 31 (ZSCAN31), transcript variant 1, mRNA [NM_030899]	chr6:28293096-28293037	hs|6p22.1
1.76186	-1.76186	-0.817102	down	NPPA	natriuretic peptide A	Homo sapiens natriuretic peptide A (NPPA), mRNA [NM_006172]	chr1:11905940-11905881	hs|1p36.22
1.76181	1.76181	0.817054	up	TRIM51	tripartite motif-containing 51	Homo sapiens tripartite motif-containing 51 (TRIM51), mRNA [NM_032681]	chr11:55655624-55655683	hs|11q11
1.76087	-1.76087	-0.816292	down	RNF180	ring finger protein 180	Homo sapiens ring finger protein 180 (RNF180), transcript variant 1, mRNA [NM_001113561]	chr5:63668314-63668373	hs|5q12.3
1.76037	-1.76037	-0.81588	down	MSANTD1	Myb/SANT-like DNA-binding domain containing 1	Homo sapiens Myb/SANT-like DNA-binding domain containing 1 (MSANTD1), mRNA [NM_001042690]	chr4:3255149-3255208	hs|4p16.3
1.76035	1.76035	0.815864	up	IKZF3	IKAROS family zinc finger 3 (Aiolos)	Homo sapiens IKAROS family zinc finger 3 (Aiolos) (IKZF3), transcript variant 1, mRNA [NM_012481]	chr17:37921970-37921911	hs|17q12
1.76002	1.76002	0.81559	up	GABRA6	gamma-aminobutyric acid (GABA) A receptor, alpha 6	Homo sapiens gamma-aminobutyric acid (GABA) A receptor, alpha 6 (GABRA6), mRNA [NM_000811]	chr5:161128866-161128925	hs|5q34
1.75989	1.75989	0.815482	up	LOC644841	uncharacterized LOC644841	Homo sapiens cDNA FLJ42553 fis, clone BRACE3005225. [AK124544]	chr7:155303293-155303352	hs|7q36.3
1.75978	1.75978	0.815395	up	HRH3	histamine receptor H3	Homo sapiens histamine receptor H3 (HRH3), mRNA [NM_007232]	chr20:60791786-60791727	hs|20q13.33
1.75961	-1.75961	-0.815252	down	ZFHX4	zinc finger homeobox 4	Homo sapiens zinc finger homeobox 4 (ZFHX4), mRNA [NM_024721]	chr8:77776697-77776756	hs|8q21.11
1.75915	1.75915	0.814877	up	CEACAM7	carcinoembryonic antigen-related cell adhesion molecule 7	Homo sapiens carcinoembryonic antigen-related cell adhesion molecule 7 (CEACAM7), transcript variant 1, mRNA [NM_006890]	chr19:42178513-42178454	hs|19q13.2
1.75912	1.75912	0.814851	up	GEM	GTP binding protein overexpressed in skeletal muscle	Homo sapiens GTP binding protein overexpressed in skeletal muscle (GEM), transcript variant 1, mRNA [NM_005261]	chr8:95262007-95261948	hs|8q22.1
1.75893	1.75893	0.814696	up	LOC102467214	uncharacterized LOC102467214	Homo sapiens uncharacterized LOC102467214 (LOC102467214), long non-coding RNA [NR_104672]	chr5:111964841-111964900	hs|5q22.2
1.75829	-1.75829	-0.814173	down	FAM150B	family with sequence similarity 150, member B	Homo sapiens family with sequence similarity 150, member B (FAM150B), mRNA [NM_001002919]	chr2:280028-279969	hs|2p25.3
1.75829	1.75829	0.814172	up	TGIF2LY	TGFB-induced factor homeobox 2-like, Y-linked	Homo sapiens TGFB-induced factor homeobox 2-like, Y-linked (TGIF2LY), mRNA [NM_139214]	chrY:3447988-3448047	hs|Yp11.2
1.75785	-1.75785	-0.813813	down	PBX4	pre-B-cell leukemia homeobox 4	Homo sapiens pre-B-cell leukemia homeobox 4 (PBX4), transcript variant 1, mRNA [NM_025245]	chr19:19672597-19672538	hs|19p13.11
1.75742	-1.75742	-0.813457	down	USH2A	Usher syndrome 2A (autosomal recessive, mild)	Homo sapiens Usher syndrome 2A (autosomal recessive, mild) (USH2A), transcript variant 2, mRNA [NM_206933]	chr1:215796392-215796333	hs|1q41
1.75728	-1.75728	-0.813346	down	MAP3K1	mitogen-activated protein kinase kinase kinase 1, E3 ubiquitin protein ligase	Homo sapiens mitogen-activated protein kinase kinase kinase 1, E3 ubiquitin protein ligase (MAP3K1), mRNA [NM_005921]	chr5:56191750-56191809	hs|5q11.2
1.75722	1.75722	0.813297	up	OR5H1	olfactory receptor, family 5, subfamily H, member 1	Homo sapiens olfactory receptor, family 5, subfamily H, member 1 (OR5H1), mRNA [NM_001005338]	chr3:97852262-97852321	hs|3q11.2
1.75672	-1.75672	-0.812882	down	HDAC7	histone deacetylase 7	histone deacetylase 7 [Source:HGNC Symbol;Acc:HGNC:14067] [ENST00000459625]	chr12:48178035-48177976	hs|12q13.11
1.75608	-1.75608	-0.812356	down	OSR2	odd-skipped related transciption factor 2	Homo sapiens odd-skipped related transciption factor 2 (OSR2), transcript variant 2, mRNA [NM_053001]	chr8:99961622-99961681	hs|8q22.2
1.75591	-1.75591	-0.812217	down	LOC101928103	uncharacterized LOC101928103	Homo sapiens uncharacterized LOC101928103 (LOC101928103), long non-coding RNA [NR_110292]	chr2:215698755-215698814	hs|2q35
1.75566	-1.75566	-0.812013	down	CORO2A	coronin, actin binding protein, 2A	Homo sapiens coronin, actin binding protein, 2A (CORO2A), transcript variant 1, mRNA [NM_003389]	chr9:100883421-100883362	hs|9q22.33
1.75499	1.75499	0.811465	up	C2orf48	chromosome 2 open reading frame 48	Homo sapiens chromosome 2 open reading frame 48 (C2orf48), mRNA [NM_182626]	chr2:10351473-10351532	hs|2p25.1
1.75473	1.75473	0.811251	up	ALDH8A1	aldehyde dehydrogenase 8 family, member A1	Homo sapiens aldehyde dehydrogenase 8 family, member A1 (ALDH8A1), transcript variant 1, mRNA [NM_022568]	chr6:135239669-135239610	hs|6q23.3
1.75468	1.75468	0.811209	up	FAM72A	family with sequence similarity 72, member A	Homo sapiens family with sequence similarity 72, member A (FAM72A), mRNA [NM_001123168]	chr1:206145518-206145577	hs|1q32.1
1.75445	1.75445	0.811019	up	LOC100132249	uncharacterized LOC100132249	Homo sapiens EEN-B2-L4 mRNA, complete cds. [AF036272]	chr9:45354950-45354891	hs|9p11.2
1.75445	1.75445	0.811018	up	DOK2	docking protein 2, 56kDa	Homo sapiens docking protein 2, 56kDa (DOK2), mRNA [NM_003974]	chr8:21767417-21767358	hs|8p21.3
1.75434	1.75434	0.810926	up	SRCIN1	SRC kinase signaling inhibitor 1	Homo sapiens SRC kinase signaling inhibitor 1 (SRCIN1), mRNA [NM_025248]	chr17:36686449-36686390	hs|17q12
1.75367	1.75367	0.810378	up	GBA3	glucosidase, beta, acid 3 (gene/pseudogene)	Homo sapiens glucosidase, beta, acid 3 (gene/pseudogene) (GBA3), transcript variant 1, mRNA [NM_020973]	chr4:22821090-22821149	hs|4p15.2
1.75363	1.75363	0.810347	up	KIAA1257	KIAA1257	Homo sapiens KIAA1257 (KIAA1257), mRNA [NM_020741]	chr3:128706497-128697008	hs|3q21.3
1.75323	-1.75323	-0.810014	down	SEMA3C	sema domain, immunoglobulin domain (Ig), short basic domain, secreted, (semaphorin) 3C	Homo sapiens sema domain, immunoglobulin domain (Ig), short basic domain, secreted, (semaphorin) 3C (SEMA3C), mRNA [NM_006379]	chr7:80372471-80372412	hs|7q21.11
1.75316	1.75316	0.809959	up	LOC100996324	uncharacterized LOC100996324	Homo sapiens uncharacterized LOC100996324 (LOC100996324), long non-coding RNA [NR_110763]	chr18:12739843-12739784	hs|18p11.21
1.75305	-1.75305	-0.809867	down	FAN1	FANCD2/FANCI-associated nuclease 1	Homo sapiens FANCD2/FANCI-associated nuclease 1 (FAN1), transcript variant 4, mRNA [NM_001146096]	chr15:31203933-31203992	hs|15q13.3
1.75267	1.75267	0.809554	up	GDNF	glial cell derived neurotrophic factor	Homo sapiens glial cell derived neurotrophic factor (GDNF), transcript variant 1, mRNA [NM_000514]	chr5:37816236-37816177	hs|5p13.2
1.75238	-1.75238	-0.809316	down	CTNNBIP1	catenin, beta interacting protein 1	Homo sapiens catenin, beta interacting protein 1 (CTNNBIP1), transcript variant 1, mRNA [NM_020248]	chr1:9908447-9908388	hs|1p36.22
1.75224	-1.75224	-0.809197	down	FANCC	Fanconi anemia, complementation group C	Homo sapiens Fanconi anemia, complementation group C (FANCC), transcript variant 1, mRNA [NM_000136]	chr9:97861581-97861522	hs|9q22.32
1.752	-1.752	-0.809005	down	CNTRL	centriolin	Homo sapiens centriolin (CNTRL), mRNA [NM_007018]	chr9:123858822-123860703	hs|9q33.2
1.75187	-1.75187	-0.808898	down	SLC35E3	solute carrier family 35, member E3	solute carrier family 35, member E3 [Source:HGNC Symbol;Acc:HGNC:20864] [ENST00000399333]	chr12:69187680-69187739	hs|12q15
1.75173	-1.75173	-0.808778	down	PLAC9	placenta-specific 9	Homo sapiens placenta-specific 9 (PLAC9), mRNA [NM_001012973]	chr10:81901875-81901934	hs|10q22.3
1.75158	1.75158	0.808657	up	SPRR2F	small proline-rich protein 2F	Homo sapiens small proline-rich protein 2F (SPRR2F), mRNA [NM_001014450]	chr1:153084715-153084656	hs|1q21.3
1.75147	1.75147	0.808567	up	DEFB108B	defensin, beta 108B	Homo sapiens defensin, beta 108B (DEFB108B), mRNA [NM_001002035]	chr11:71548495-71548553	hs|11q13.4
1.75141	1.75141	0.808514	up	CCDC141	coiled-coil domain containing 141	Homo sapiens mRNA; cDNA DKFZp686G197 (from clone DKFZp686G197). [AL832777]	chr2:179737812-179737753	hs|2q31.2
1.75081	1.75081	0.80802	up	CSRP3	cysteine and glycine-rich protein 3 (cardiac LIM protein)	Homo sapiens cysteine and glycine-rich protein 3 (cardiac LIM protein) (CSRP3), mRNA [NM_003476]	chr11:19204109-19204050	hs|11p15.1
1.75078	-1.75078	-0.807994	down	H6PD	hexose-6-phosphate dehydrogenase (glucose 1-dehydrogenase)	Homo sapiens hexose-6-phosphate dehydrogenase (glucose 1-dehydrogenase) (H6PD), transcript variant 2, mRNA [NM_004285]	chr1:9330351-9330410	hs|1p36.22
1.75074	-1.75074	-0.807962	down	lnc-KLHL31-2	lnc-KLHL31-2:2	LNCipedia lincRNA (lnc-KLHL31-2), lincRNA [lnc-KLHL31-2:2]	chr6:53658142-53658083	hs|6p12.1
1.75073	-1.75073	-0.807953	down	USP25	ubiquitin specific peptidase 25	Homo sapiens ubiquitin specific peptidase 25 (USP25), transcript variant 3, mRNA [NM_013396]	chr21:17251556-17251615	hs|21q21.1
1.75046	1.75046	0.807732	up	LAMC3	laminin, gamma 3	Homo sapiens laminin, gamma 3 (LAMC3), mRNA [NM_006059]	chr9:133967284-133967341	hs|9q34.12
1.7502	-1.7502	-0.807519	down	TTC29	tetratricopeptide repeat domain 29	Homo sapiens tetratricopeptide repeat domain 29 (TTC29), transcript variant 2, mRNA [NM_031956]	chr4:147741319-147724821	hs|4q31.22
1.74994	-1.74994	-0.807307	down	TET1	tet methylcytosine dioxygenase 1	Homo sapiens tet methylcytosine dioxygenase 1 (TET1), mRNA [NM_030625]	chr10:70453516-70453575	hs|10q21.3
1.74952	1.74952	0.806961	up	OR5D18	olfactory receptor, family 5, subfamily D, member 18	Homo sapiens olfactory receptor, family 5, subfamily D, member 18 (OR5D18), mRNA [NM_001001952]	chr11:55587982-55588041	hs|11q11
1.74925	1.74925	0.806734	up	LOC101929607	uncharacterized LOC101929607	Homo sapiens uncharacterized LOC101929607 (LOC101929607), long non-coding RNA [NR_110039]	chr3:107182685-107182744	hs|3q13.12
1.74887	-1.74887	-0.806421	down	RASGRP3	RAS guanyl releasing protein 3 (calcium and DAG-regulated)	Homo sapiens RAS guanyl releasing protein 3 (calcium and DAG-regulated) (RASGRP3), transcript variant 2, mRNA [NM_170672]	chr2:33789294-33789353	hs|2p22.3
1.74873	-1.74873	-0.806304	down	HR	hair growth associated	Homo sapiens hair growth associated (HR), transcript variant 1, mRNA [NM_005144]	chr8:21972885-21972826	hs|8p21.3
1.74863	1.74863	0.806221	up	TRIM14	tripartite motif containing 14	Homo sapiens tripartite motif containing 14 (TRIM14), transcript variant 1, mRNA [NM_014788]	chr9:100846713-100846654	hs|9q22.33
1.7478	1.7478	0.805543	up	GPX3	glutathione peroxidase 3 (plasma)	Homo sapiens glutathione peroxidase 3 (plasma) (GPX3), mRNA [NM_002084]	chr5:150407032-150407091	hs|5q33.1
1.74755	1.74755	0.805334	up	CHD1	chromodomain helicase DNA binding protein 1	Homo sapiens chromodomain helicase DNA binding protein 1 (CHD1), mRNA [NM_001270]	chr5:98191985-98191926	hs|5q15
1.74749	-1.74749	-0.805287	down	sept11	septin 11	Homo sapiens septin 11 (SEPT11), mRNA [NM_018243]	chr4:77959708-77959767	hs|4q21.1
1.74733	1.74733	0.805151	up	LOC100628314	uncharacterized LOC100628314	UI-1-BC1p-akz-b-02-0-UI.s1 NCI_CGAP_Pl3 Homo sapiens cDNA clone UI-1-BC1p-akz-b-02-0-UI 3', mRNA sequence [BQ013595]	chr20:21950985-21950926	hs|20p11.22
1.74664	1.74664	0.804579	up	NXPH2	neurexophilin 2	Homo sapiens neurexophilin 2 (NXPH2), mRNA [NM_007226]	chr2:139428601-139428542	hs|2q22.1
1.74661	-1.74661	-0.80456	down	GAB1	GRB2-associated binding protein 1	Homo sapiens GRB2-associated binding protein 1 (GAB1), transcript variant 1, mRNA [NM_207123]	chr4:144390452-144390511	hs|4q31.21
1.74661	-1.74661	-0.80456	down	KIT	v-kit Hardy-Zuckerman 4 feline sarcoma viral oncogene homolog	Homo sapiens v-kit Hardy-Zuckerman 4 feline sarcoma viral oncogene homolog (KIT), transcript variant 1, mRNA [NM_000222]	chr4:55606511-55606570	hs|4q12
1.74629	1.74629	0.804291	up	ACKR3	atypical chemokine receptor 3	Homo sapiens atypical chemokine receptor 3 (ACKR3), mRNA [NM_020311]	chr2:237490783-237490842	hs|2q37.3
1.74618	-1.74618	-0.804206	down	NFE2	nuclear factor, erythroid 2	Homo sapiens nuclear factor, erythroid 2 (NFE2), transcript variant 1, mRNA [NM_006163]	chr12:54686038-54685979	hs|12q13.13
1.74617	1.74617	0.804196	up	OAS3	2'-5'-oligoadenylate synthetase 3, 100kDa	Homo sapiens 2'-5'-oligoadenylate synthetase 3, 100kDa (OAS3), mRNA [NM_006187]	chr12:113410131-113410190	hs|12q24.13
1.74557	1.74557	0.803697	up	GABRG2	gamma-aminobutyric acid (GABA) A receptor, gamma 2	Homo sapiens gamma-aminobutyric acid (GABA) A receptor, gamma 2 (GABRG2), transcript variant 1, mRNA [NM_198904]	chr5:161582441-161582500	hs|5q34
1.74527	-1.74527	-0.803448	down	SOX6	SRY (sex determining region Y)-box 6	Homo sapiens SRY (sex determining region Y)-box 6 (SOX6), transcript variant 1, mRNA [NM_017508]	chr11:15991854-15991795	hs|11p15.2
1.74513	1.74513	0.803336	up	TMEM41A	transmembrane protein 41A	transmembrane protein 41A [Source:HGNC Symbol;Acc:HGNC:30544] [ENST00000467061]	chr3:185213853-185213794	hs|3q27.2
1.74459	1.74459	0.802885	up	ELAVL4	ELAV like neuron-specific RNA binding protein 4	Homo sapiens ELAV like neuron-specific RNA binding protein 4 (ELAVL4), transcript variant 1, mRNA [NM_021952]	chr1:50666551-50666610	hs|1p33
1.74414	1.74414	0.802518	up	lnc-FBXL7-3	lnc-FBXL7-3:1	AGENCOURT_40977101 NIH_MGC_278 Homo sapiens cDNA clone IMAGE:7773405 3', mRNA sequence [CX759005]	chr5:16431971-16432335	hs|5p15.1
1.74408	1.74408	0.802466	up	RIMBP3	RIMS binding protein 3	Homo sapiens RIMS binding protein 3 (RIMBP3), mRNA [NM_015672]	chr22:20456128-20456069	hs|22q11.21
1.74385	1.74385	0.802276	up	GOLGA7B	golgin A7 family, member B	Homo sapiens golgin A7 family, member B (GOLGA7B), mRNA [NM_001010917]	chr10:99629702-99629761	hs|10q24.2
1.74367	-1.74367	-0.802126	down	PIP4K2A	phosphatidylinositol-5-phosphate 4-kinase, type II, alpha	phosphatidylinositol-5-phosphate 4-kinase, type II, alpha [Source:HGNC Symbol;Acc:HGNC:8997] [ENST00000422321]	chr10:22856645-22856586	hs|10p12.2
1.7431	-1.7431	-0.801653	down	BCO1	beta-carotene oxygenase 1	Homo sapiens beta-carotene oxygenase 1 (BCO1), mRNA [NM_017429]	chr16:81323976-81324035	hs|16q23.2
1.74247	-1.74247	-0.801135	down	TACC1	transforming, acidic coiled-coil containing protein 1	transforming, acidic coiled-coil containing protein 1 [Source:HGNC Symbol;Acc:HGNC:11522] [ENST00000518415]	chr8:38602894-38602953	hs|8p11.22
1.74241	-1.74241	-0.801083	down	LOC101927619	uncharacterized LOC101927619	Homo sapiens uncharacterized LOC101927619 (LOC101927619), long non-coding RNA [NR_110267]	chr2:199239284-199239225	hs|2q33.1
1.74229	-1.74229	-0.800984	down	ANKRD12	ankyrin repeat domain 12	Homo sapiens ankyrin repeat domain 12 (ANKRD12), transcript variant 3, mRNA [NM_001204056]	chr18:9284825-9284884	hs|18p11.22
1.7416	-1.7416	-0.800412	down	KBTBD3	kelch repeat and BTB (POZ) domain containing 3	Homo sapiens kelch repeat and BTB (POZ) domain containing 3 (KBTBD3), transcript variant 2, mRNA [NM_198439]	chr11:105923662-105923603	hs|11q22.3
1.74153	-1.74153	-0.800352	down	SPRYD7	SPRY domain containing 7	SPRY domain containing 7 [Source:HGNC Symbol;Acc:HGNC:14297] [ENST00000613924]	chr13:50486991-50486932	hs|13q14.2
1.74098	-1.74098	-0.799901	down	ERCC6L	excision repair cross-complementation group 6-like	Homo sapiens excision repair cross-complementation group 6-like (ERCC6L), mRNA [NM_017669]	chrX:71425169-71425110	hs|Xq13.1
1.74029	-1.74029	-0.799325	down	lnc-CRIPT-1	lnc-CRIPT-1:2	LNCipedia lincRNA (lnc-CRIPT-1), lincRNA [lnc-CRIPT-1:2]	chr2:46877488-46877547	hs|2p21
1.74019	-1.74019	-0.799245	down	LOC101927239	uncharacterized LOC101927239	Homo sapiens uncharacterized LOC101927239 (LOC101927239), long non-coding RNA [NR_110748]	chr17:32496454-32496395	hs|17q12
1.73975	-1.73975	-0.798882	down	SCAI	suppressor of cancer cell invasion	Homo sapiens suppressor of cancer cell invasion (SCAI), transcript variant 1, mRNA [NM_173690]	chr9:127705207-127705148	hs|9q33.3
1.73975	1.73975	0.79888	up	CHRNA3	cholinergic receptor, nicotinic, alpha 3 (neuronal)	Homo sapiens cholinergic receptor, nicotinic, alpha 3 (neuronal) (CHRNA3), transcript variant 2, mRNA [NM_001166694]	chr15:78885512-78885453	hs|15q25.1
1.73945	1.73945	0.798632	up	LOC100130256	uncharacterized LOC100130256	PREDICTED: Homo sapiens uncharacterized LOC100130256 (AC007277.3), misc_RNA [XR_249242]	chr2:171551684-171551625	hs|2q31.1
1.73916	-1.73916	-0.798389	down	NOX4	NADPH oxidase 4	Homo sapiens NADPH oxidase 4 (NOX4), transcript variant 1, mRNA [NM_016931]	chr11:89059885-89059826	hs|11q14.3
1.73909	-1.73909	-0.798332	down	VIT	vitrin	Homo sapiens vitrin (VIT), transcript variant 1, mRNA [NM_053276]	chr2:37041766-37041825	hs|2p22.2
1.73877	-1.73877	-0.798065	down	SNX29	sorting nexin 29	Homo sapiens sorting nexin 29 (SNX29), mRNA [NM_032167]	chr16:12145978-12146037	hs|16p13.13
1.73876	1.73876	0.798056	up	lnc-LONRF1-2	lnc-LONRF1-2:1	Homo sapiens cDNA clone IMAGE:5199989. [BC030211]	chr8:12464551-12464492	hs|8p23.1
1.7387	1.7387	0.798005	up	EREG	epiregulin	Homo sapiens epiregulin (EREG), mRNA [NM_001432]	chr4:75254009-75254068	hs|4q13.3
1.73868	1.73868	0.79799	up	OTOP3	otopetrin 3	Homo sapiens otopetrin 3 (OTOP3), transcript variant 1, mRNA [NM_178233]	chr17:72939785-72942780	hs|17q25.1
1.73841	1.73841	0.797767	up	ADRA1D	adrenoceptor alpha 1D	Homo sapiens adrenoceptor alpha 1D (ADRA1D), mRNA [NM_000678]	chr20:4201337-4201278	hs|20p13
1.73816	-1.73816	-0.797559	down	DBP	D site of albumin promoter (albumin D-box) binding protein	Homo sapiens D site of albumin promoter (albumin D-box) binding protein (DBP), mRNA [NM_001352]	chr19:49136805-49136746	hs|19q13.33
1.73806	-1.73806	-0.79748	down	SSC5D	scavenger receptor cysteine rich family, 5 domains	Homo sapiens scavenger receptor cysteine rich family, 5 domains (SSC5D), transcript variant 1, mRNA [NM_001144950]	chr19:56030351-56030410	hs|19q13.42
1.73804	-1.73804	-0.797459	down	IL7	interleukin 7	Homo sapiens interleukin 7 (IL7), transcript variant 1, mRNA [NM_000880]	chr8:79645431-79645372	hs|8q21.12
1.738	1.738	0.797431	up	EBF2	early B-cell factor 2	Homo sapiens early B-cell factor 2 (EBF2), mRNA [NM_022659]	chr8:25715970-25715911	hs|8p21.2
1.73764	-1.73764	-0.797132	down	SRF	serum response factor (c-fos serum response element-binding transcription factor)	Homo sapiens serum response factor (c-fos serum response element-binding transcription factor) (SRF), transcript variant 1, mRNA [NM_003131]	chr6:43148285-43148344	hs|6p21.1
1.73737	1.73737	0.796906	up	TGFBR3L	transforming growth factor, beta receptor III-like	Homo sapiens transforming growth factor, beta receptor III-like (TGFBR3L), mRNA [NM_001195259]	chr19:7983818-7983877	hs|19p13.2
1.73706	1.73706	0.79665	up	SPTLC3	serine palmitoyltransferase, long chain base subunit 3	Homo sapiens serine palmitoyltransferase, long chain base subunit 3 (SPTLC3), mRNA [NM_018327]	chr20:13147054-13147113	hs|20p12.1
1.73666	1.73666	0.796317	up	TMEM225	transmembrane protein 225	Homo sapiens transmembrane protein 225 (TMEM225), mRNA [NM_001013743]	chr11:123754013-123753954	hs|11q24.1
1.73664	1.73664	0.796295	up	TRIM49B	tripartite motif containing 49B	Homo sapiens tripartite motif containing 49B (TRIM49B), mRNA [NM_001206626]	chr11:49055863-49055922	hs|11p11.12
1.7366	-1.7366	-0.796264	down	CCDC57	coiled-coil domain containing 57	coiled-coil domain containing 57 [Source:HGNC Symbol;Acc:HGNC:27564] [ENST00000327026]	chr17:80111566-80111507	hs|17q25.3
1.73607	-1.73607	-0.795821	down	HMGB2	high mobility group box 2	Homo sapiens high mobility group box 2 (HMGB2), transcript variant 1, mRNA [NM_002129]	chr4:174253072-174253013	hs|4q34.1
1.73576	-1.73576	-0.795566	down	PCDH7	protocadherin 7	Homo sapiens protocadherin 7 (PCDH7), transcript variant a, mRNA [NM_002589]	chr4:30726159-30726218	hs|4p15.1
1.7356	1.7356	0.795438	up	FGF13	fibroblast growth factor 13	Homo sapiens fibroblast growth factor 13 (FGF13), transcript variant 1, mRNA [NM_004114]	chrX:137713947-137713888	hs|Xq26.3
1.73528	-1.73528	-0.795169	down	TET1	tet methylcytosine dioxygenase 1	Homo sapiens tet methylcytosine dioxygenase 1 (TET1), mRNA [NM_030625]	chr10:70332072-70332131	hs|10q21.3
1.73522	1.73522	0.79512	up	P2RY8	purinergic receptor P2Y, G-protein coupled, 8	Homo sapiens purinergic receptor P2Y, G-protein coupled, 8 (P2RY8), mRNA [NM_178129]	chrX:1581746-1581687	hs|Xp22.33
1.73519	-1.73519	-0.795096	down	RAMP1	receptor (G protein-coupled) activity modifying protein 1	Homo sapiens receptor (G protein-coupled) activity modifying protein 1 (RAMP1), mRNA [NM_005855]	chr2:238820661-238820720	hs|2q37.3
1.73496	1.73496	0.7949	up	CACNA1G	calcium channel, voltage-dependent, T type, alpha 1G subunit	Homo sapiens mRNA for NBR13, complete cds. [AB012043]	chr17:48683774-48683833	hs|17q21.33
1.73444	1.73444	0.794466	up	RASSF5	Ras association (RalGDS/AF-6) domain family member 5	Homo sapiens Ras association (RalGDS/AF-6) domain family member 5 (RASSF5), transcript variant 2, mRNA [NM_182664]	chr1:206757950-206758009	hs|1q32.1
1.73437	-1.73437	-0.794408	down	AKNA	AT-hook transcription factor	AT-hook transcription factor [Source:HGNC Symbol;Acc:HGNC:24108] [ENST00000312033]	chr9:117121825-117121766	hs|9q32
1.73394	1.73394	0.794058	up	SLC37A1	solute carrier family 37 (glucose-6-phosphate transporter), member 1	solute carrier family 37 (glucose-6-phosphate transporter), member 1 [Source:HGNC Symbol;Acc:HGNC:11024] [ENST00000454800]	chr21:43917458-43917517	hs|21q22.3
1.73392	1.73392	0.794036	up	FGA	fibrinogen alpha chain	Homo sapiens fibrinogen alpha chain (FGA), transcript variant alpha-E, mRNA [NM_000508]	chr4:155504424-155504365	hs|4q31.3
1.73363	1.73363	0.793794	up	MYRFL	myelin regulatory factor-like	myelin regulatory factor-like [Source:HGNC Symbol;Acc:HGNC:26316] [ENST00000299350]	chr12:70352267-70352326	hs|12q15
1.73345	-1.73345	-0.793647	down	GABARAPL1	GABA(A) receptor-associated protein like 1	Homo sapiens GABA(A) receptor-associated protein like 1 (GABARAPL1), mRNA [NM_031412]	chr12:10375579-10375637	hs|12p13.2
1.7334	-1.7334	-0.793602	down	ARHGAP28	Rho GTPase activating protein 28	Homo sapiens Rho GTPase activating protein 28 (ARHGAP28), mRNA [NM_001010000]	chr18:6914865-6914924	hs|18p11.31
1.73334	1.73334	0.793556	up	CD86	CD86 molecule	Homo sapiens CD86 molecule (CD86), transcript variant 2, mRNA [NM_006889]	chr3:121839246-121839305	hs|3q13.33
1.73333	-1.73333	-0.793548	down	HIP1R	huntingtin interacting protein 1 related	Homo sapiens huntingtin interacting protein 1 related (HIP1R), transcript variant 1, mRNA [NM_003959]	chr12:123346550-123346609	hs|12q24.31
1.73328	-1.73328	-0.793505	down	BNIPL	BCL2/adenovirus E1B 19kD interacting protein like	Homo sapiens BCL2/adenovirus E1B 19kD interacting protein like (BNIPL), transcript variant 2, mRNA [NM_001159642]	chr1:151020016-151020075	hs|1q21.3
1.73314	-1.73314	-0.793384	down	VSIG4	V-set and immunoglobulin domain containing 4	Homo sapiens V-set and immunoglobulin domain containing 4 (VSIG4), transcript variant 1, mRNA [NM_007268]	chrX:65241745-65241686	hs|Xq12
1.73306	1.73306	0.793319	up	OR51I1	olfactory receptor, family 51, subfamily I, member 1	Homo sapiens olfactory receptor, family 51, subfamily I, member 1 (OR51I1), mRNA [NM_001005288]	chr11:5462360-5462301	hs|11p15.4
1.73273	-1.73273	-0.79305	down	CCSER1	coiled-coil serine-rich protein 1	Homo sapiens coiled-coil serine-rich protein 1 (CCSER1), transcript variant 2, mRNA [NM_207491]	chr4:91703068-91703127	hs|4q22.1
1.73248	-1.73248	-0.792835	down	ZDHHC8	zinc finger, DHHC-type containing 8	Homo sapiens zinc finger, DHHC-type containing 8 (ZDHHC8), transcript variant 2, mRNA [NM_013373]	chr22:20135467-20135526	hs|22q11.21
1.73244	1.73244	0.792807	up	LOC400682	zinc finger protein 100-like	PREDICTED: Homo sapiens zinc finger protein 100-like (LOC400682), mRNA [XM_003846486]	chr19:21841228-21841287	hs|19p12
1.73236	-1.73236	-0.792742	down	TBC1D2	TBC1 domain family, member 2	Homo sapiens TBC1 domain family, member 2 (TBC1D2), transcript variant 1, mRNA [NM_001267571]	chr9:100961388-100961329	hs|9q22.33
1.73231	1.73231	0.792696	up	FCGR1B	Fc fragment of IgG, high affinity Ib, receptor (CD64)	Homo sapiens Fc fragment of IgG, high affinity Ib, receptor (CD64) (FCGR1B), transcript variant 1, mRNA [NM_001017986]	chr1:120927353-120927294	hs|1p11.2
1.73226	1.73226	0.792654	up	TMEM52B	transmembrane protein 52B	Homo sapiens transmembrane protein 52B (TMEM52B), transcript variant 1, mRNA [NM_153022]	chr12:10343383-10343442	hs|12p13.2
1.73218	1.73218	0.792591	up	ENOSF1	enolase superfamily member 1	Homo sapiens enolase superfamily member 1 (ENOSF1), transcript variant 2, mRNA [NM_001126123]	chr18:674224-674165	hs|18p11.32
1.73216	-1.73216	-0.792569	down	NID1	nidogen 1	Homo sapiens nidogen 1 (NID1), mRNA [NM_002508]	chr1:236139213-236139154	hs|1q42.3
1.73213	1.73213	0.792544	up	RBM44	RNA binding motif protein 44	RNA binding motif protein 44 [Source:HGNC Symbol;Acc:HGNC:24756] [ENST00000491996]	chr2:238743452-238743511	hs|2q37.3
1.73209	1.73209	0.792512	up	SLC26A7	solute carrier family 26 (anion exchanger), member 7	Homo sapiens solute carrier family 26 (anion exchanger), member 7 (SLC26A7), transcript variant 1, mRNA [NM_052832]	chr8:92410007-92410066	hs|8q21.3
1.73155	-1.73155	-0.792062	down	TET1	tet methylcytosine dioxygenase 1	Homo sapiens tet methylcytosine dioxygenase 1 (TET1), mRNA [NM_030625]	chr10:70454164-70454223	hs|10q21.3
1.73104	1.73104	0.791643	up	LOC730159	uncharacterized LOC730159	Homo sapiens uncharacterized LOC730159 (LOC730159), mRNA [NM_001195190]	chr1:173606104-173606163	hs|1q25.1
1.73063	-1.73063	-0.7913	down	STEAP4	STEAP family member 4	Homo sapiens STEAP family member 4 (STEAP4), transcript variant 2, mRNA [NM_001205315]	chr7:87912171-87912112	hs|7q21.12
1.73062	-1.73062	-0.79129	down	PLAC9	placenta-specific 9	placenta-specific 9 [Source:HGNC Symbol;Acc:HGNC:19255] [ENST00000372263]	chr10:81904761-81904820	hs|10q22.3
1.73057	-1.73057	-0.791249	down	NEDD4L	neural precursor cell expressed, developmentally down-regulated 4-like, E3 ubiquitin protein ligase	Homo sapiens neural precursor cell expressed, developmentally down-regulated 4-like, E3 ubiquitin protein ligase (NEDD4L), transcript variant d, mRNA [NM_015277]	chr18:56065317-56065376	hs|18q21.31
1.73053	-1.73053	-0.791214	down	GADD45B	growth arrest and DNA-damage-inducible, beta	Homo sapiens growth arrest and DNA-damage-inducible, beta (GADD45B), mRNA [NM_015675]	chr19:2478178-2478237	hs|19p13.3
1.73047	-1.73047	-0.791164	down	GNAO1	guanine nucleotide binding protein (G protein), alpha activating activity polypeptide O	Homo sapiens guanine nucleotide binding protein (G protein), alpha activating activity polypeptide O (GNAO1), transcript variant 1, mRNA [NM_020988]	chr16:56391090-56391149	hs|16q12.2
1.73044	-1.73044	-0.791135	down	GPR64	G protein-coupled receptor 64	Homo sapiens G protein-coupled receptor 64 (GPR64), transcript variant 1, mRNA [NM_001079858]	chrX:19008888-19008829	hs|Xp22.13
1.73041	-1.73041	-0.791114	down	LOC100506606	uncharacterized LOC100506606	Homo sapiens uncharacterized LOC100506606 (LOC100506606), long non-coding RNA [NR_103860]	chr12:29433444-29433385	hs|12p11.22
1.73024	1.73024	0.79097	up	OR51V1	olfactory receptor, family 51, subfamily V, member 1	Homo sapiens olfactory receptor, family 51, subfamily V, member 1 (OR51V1), mRNA [NM_001004760]	chr11:5221024-5220965	hs|11p15.4
1.73021	1.73021	0.790943	up	HFE	hemochromatosis	Homo sapiens hemochromatosis (HFE), transcript variant 11, mRNA [NM_139011]	chr6:26087545-26087604	hs|6p22.2
1.72969	1.72969	0.790516	up	LOC729658	uncharacterized LOC729658	Homo sapiens uncharacterized LOC729658 (LOC729658), long non-coding RNA [NR_122120]	chr6:163604384-163604325	hs|6q26
1.72969	-1.72969	-0.790513	down	ATP6V1E2	ATPase, H+ transporting, lysosomal 31kDa, V1 subunit E2	Homo sapiens ATPase, H+ transporting, lysosomal 31kDa, V1 subunit E2 (ATP6V1E2), mRNA [NM_080653]	chr2:46739193-46739134	hs|2p21
1.72948	-1.72948	-0.790335	down	ALDH7A1	aldehyde dehydrogenase 7 family, member A1	Homo sapiens aldehyde dehydrogenase 7 family, member A1 (ALDH7A1), transcript variant 1, mRNA [NM_001182]	chr5:125877621-125877562	hs|5q23.2
1.7294	1.7294	0.790273	up	SEC11C	SEC11 homolog C (S. cerevisiae)	Homo sapiens SEC11 homolog C (S. cerevisiae) (SEC11C), mRNA [NM_033280]	chr18:56824892-56825917	hs|18q21.32
1.72892	1.72892	0.789868	up	RBMXL2	RNA binding motif protein, X-linked-like 2	Homo sapiens RNA binding motif protein, X-linked-like 2 (RBMXL2), mRNA [NM_014469]	chr11:7111983-7112042	hs|11p15.4
1.72881	1.72881	0.789776	up	lnc-GCNT3-1	lnc-GCNT3-1:1	BJ995728 human hepatoblastoma cDNA Homo sapiens cDNA clone hmft-3130 5', mRNA sequence [BJ995728]	chr15:59981503-59981562	hs|15q22.2
1.7288	1.7288	0.789773	up	OR2T6	olfactory receptor, family 2, subfamily T, member 6	Homo sapiens olfactory receptor, family 2, subfamily T, member 6 (OR2T6), mRNA [NM_001005471]	chr1:248551759-248551818	hs|1q44
1.72872	-1.72872	-0.7897	down	BCL7A	B-cell CLL/lymphoma 7A	Homo sapiens B-cell CLL/lymphoma 7A (BCL7A), transcript variant 1, mRNA [NM_020993]	chr12:122499758-122499817	hs|12q24.31
1.72856	-1.72856	-0.789574	down	ITGAV	integrin, alpha V	Homo sapiens integrin, alpha V (ITGAV), transcript variant 1, mRNA [NM_002210]	chr2:187545295-187545354	hs|2q32.1
1.72824	1.72824	0.789307	up	POTED	POTE ankyrin domain family, member D	Homo sapiens POTE ankyrin domain family, member D (POTED), mRNA [NM_174981]	chr21:14987781-14987839	hs|21q11.2
1.72819	-1.72819	-0.789264	down	PPP1R3C	protein phosphatase 1, regulatory subunit 3C	Homo sapiens protein phosphatase 1, regulatory subunit 3C (PPP1R3C), mRNA [NM_005398]	chr10:93388289-93388230	hs|10q23.32
1.7276	1.7276	0.788773	up	SERPINA12	serpin peptidase inhibitor, clade A (alpha-1 antiproteinase, antitrypsin), member 12	Homo sapiens serpin peptidase inhibitor, clade A (alpha-1 antiproteinase, antitrypsin), member 12 (SERPINA12), mRNA [NM_173850]	chr14:94964182-94964123	hs|14q32.13
1.72706	-1.72706	-0.788322	down	CXCL12	chemokine (C-X-C motif) ligand 12	Homo sapiens chemokine (C-X-C motif) ligand 12 (CXCL12), transcript variant 2, mRNA [NM_000609]	chr10:44865676-44865617	hs|10q11.21
1.7269	1.7269	0.788183	up	CHST5	carbohydrate (N-acetylglucosamine 6-O) sulfotransferase 5	Homo sapiens carbohydrate (N-acetylglucosamine 6-O) sulfotransferase 5 (CHST5), mRNA [NM_024533]	chr16:75562808-75562749	hs|16q23.1
1.7265	1.7265	0.787853	up	LOC100293748	uncharacterized LOC100293748	PREDICTED: Homo sapiens uncharacterized LOC100293748 (LOC100293748), transcript variant X1, ncRNA [XR_425012]	chr1:149251200-149251259	hs|1q21.2
1.72644	-1.72644	-0.787797	down	CCDC73	coiled-coil domain containing 73	Homo sapiens coiled-coil domain containing 73 (CCDC73), mRNA [NM_001008391]	chr11:32624534-32624475	hs|11p13
1.72617	-1.72617	-0.787576	down	MIA	melanoma inhibitory activity	Homo sapiens melanoma inhibitory activity (MIA), transcript variant 1, mRNA [NM_006533]	chr19:41282959-41283335	hs|19q13.2
1.7258	-1.7258	-0.787265	down	lnc-DGCR6-2	lnc-DGCR6-2:6	GB	chr22:18986026-18990422	hs|22q11.21
1.7257	1.7257	0.78718	up	KIR2DL5A	killer cell immunoglobulin-like receptor, two domains, long cytoplasmic tail, 5A	Homo sapiens killer cell immunoglobulin-like receptor, two domains, long cytoplasmic tail, 5A (KIR2DL5A), mRNA [NM_020535]	chr19_gl000209_random:89704-89763
1.72548	1.72548	0.786995	up	LOC100130865	uncharacterized LOC100130865	Homo sapiens cDNA FLJ41135 fis, clone BRACE2028970. [AK123130]	chr4:2265613-2265554	hs|4p16.3
1.72512	-1.72512	-0.786696	down	MYH10	myosin, heavy chain 10, non-muscle	Homo sapiens myosin, heavy chain 10, non-muscle (MYH10), transcript variant 1, mRNA [NM_001256012]	chr17:8377599-8377540	hs|17p13.1
1.72496	-1.72496	-0.786566	down	WNK1	WNK lysine deficient protein kinase 1	Homo sapiens WNK lysine deficient protein kinase 1 (WNK1), transcript variant 3, mRNA [NM_213655]	chr12:978138-978197	hs|12p13.33
1.72473	1.72473	0.78637	up	STEAP1	six transmembrane epithelial antigen of the prostate 1	Homo sapiens six transmembrane epithelial antigen of the prostate 1 (STEAP1), mRNA [NM_012449]	chr7:89790531-89790590	hs|7q21.13
1.72456	-1.72456	-0.786228	down	LENEP	lens epithelial protein	Homo sapiens lens epithelial protein (LENEP), mRNA [NM_018655]	chr1:154966470-154966529	hs|1q21.3
1.72443	1.72443	0.78612	up	GUCY2C	guanylate cyclase 2C	Homo sapiens guanylate cyclase 2C (GUCY2C), mRNA [NM_004963]	chr12:14766089-14766030	hs|12p13.1
1.72437	-1.72437	-0.786066	down	LILRA5	leukocyte immunoglobulin-like receptor, subfamily A (with TM domain), member 5	Homo sapiens leukocyte immunoglobulin-like receptor, subfamily A (with TM domain), member 5 (LILRA5), transcript variant 3, mRNA [NM_181879]	chr19:54822777-54822718	hs|19q13.42
1.72432	-1.72432	-0.786027	down	ARMCX4	armadillo repeat containing, X-linked 4	armadillo repeat containing, X-linked 4 [Source:HGNC Symbol;Acc:HGNC:28615] [ENST00000430461]	chrX:100701027-100701086	hs|Xq22.1
1.72355	-1.72355	-0.785382	down	PCGF5	polycomb group ring finger 5	Homo sapiens polycomb group ring finger 5 (PCGF5), transcript variant 1, mRNA [NM_032373]	chr10:93043866-93043925	hs|10q23.32
1.72338	1.72338	0.785239	up	SERPINB13	serpin peptidase inhibitor, clade B (ovalbumin), member 13	Homo sapiens serpin peptidase inhibitor, clade B (ovalbumin), member 13 (SERPINB13), mRNA [NM_012397]	chr18:61266324-61266383	hs|18q21.33
1.72294	-1.72294	-0.784873	down	NXN	nucleoredoxin	Homo sapiens nucleoredoxin (NXN), transcript variant 1, mRNA [NM_022463]	chr17:703653-703594	hs|17p13.3
1.72248	-1.72248	-0.784488	down	C14orf37	chromosome 14 open reading frame 37	Homo sapiens chromosome 14 open reading frame 37 (C14orf37), mRNA [NM_001001872]	chr14:58470872-58470813	hs|14q23.1
1.72242	-1.72242	-0.784436	down	GID4	GID complex subunit 4	GID complex subunit 4 [Source:HGNC Symbol;Acc:HGNC:28453] [ENST00000376345]	chr17:17960366-17960425	hs|17p11.2
1.72239	-1.72239	-0.784413	down	lnc-GIN1-1	lnc-GIN1-1:2	BX095244 Soares_NFL_T_GBC_S1 Homo sapiens cDNA clone IMAGp998D184515, mRNA sequence [BX095244]	chr5:102581811-102581752	hs|5q21.1
1.72199	-1.72199	-0.78408	down	TNFRSF19	tumor necrosis factor receptor superfamily, member 19	Homo sapiens tumor necrosis factor receptor superfamily, member 19 (TNFRSF19), transcript variant 1, mRNA [NM_018647]	chr13:24243117-24243176	hs|13q12.12
1.72156	-1.72156	-0.783719	down	PBXIP1	pre-B-cell leukemia homeobox interacting protein 1	Homo sapiens pre-B-cell leukemia homeobox interacting protein 1 (PBXIP1), mRNA [NM_020524]	chr1:154917198-154917139	hs|1q21.3
1.72133	1.72133	0.783522	up	MBL2	mannose-binding lectin (protein C) 2, soluble	Homo sapiens mannose-binding lectin (protein C) 2, soluble (MBL2), mRNA [NM_000242]	chr10:54525560-54525501	hs|10q21.1
1.72122	1.72122	0.783432	up	RIMKLA	ribosomal modification protein rimK-like family member A	Homo sapiens ribosomal modification protein rimK-like family member A (RIMKLA), mRNA [NM_173642]	chr1:42880642-42880701	hs|1p34.2
1.72071	-1.72071	-0.783006	down	CFAP46	cilia and flagella associated protein 46	Homo sapiens cilia and flagella associated protein 46 (CFAP46), mRNA [NM_001200049]	chr10:134647610-134647551	hs|10q26.3
1.72066	1.72066	0.782966	up	KLRF1	killer cell lectin-like receptor subfamily F, member 1	Homo sapiens killer cell lectin-like receptor subfamily F, member 1 (KLRF1), transcript variant 1, mRNA [NM_016523]	chr12:9997324-9997383	hs|12p13.31
1.72032	1.72032	0.782676	up	CUX2	cut-like homeobox 2	Homo sapiens cut-like homeobox 2 (CUX2), mRNA [NM_015267]	chr12:111788124-111788183	hs|12q24.12
1.72006	1.72006	0.782462	up	C1orf21	chromosome 1 open reading frame 21	Homo sapiens chromosome 1 open reading frame 21 (C1orf21), mRNA [NM_030806]	chr1:184597996-184598055	hs|1q25.3
1.72006	-1.72006	-0.782462	down	CLEC18B	C-type lectin domain family 18, member B	Homo sapiens C-type lectin domain family 18, member B (CLEC18B), mRNA [NM_001011880]	chr16:74442597-74442538	hs|16q23.1
1.71998	1.71998	0.782394	up	LOC100128374	uncharacterized LOC100128374	PREDICTED: Homo sapiens uncharacterized LOC100128374 (LOC100128374), misc_RNA [XR_112969]	chr7:1887050-1887109	hs|7p22.3
1.71871	1.71871	0.781327	up	ULBP1	UL16 binding protein 1	Homo sapiens UL16 binding protein 1 (ULBP1), mRNA [NM_025218]	chr6:150292927-150292986	hs|6q25.1
1.71847	-1.71847	-0.781123	down	FNDC7	fibronectin type III domain containing 7	Homo sapiens fibronectin type III domain containing 7 (FNDC7), mRNA [NM_001144937]	chr1:109285290-109285349	hs|1p13.3
1.71827	1.71827	0.78096	up	LOC100506489	uncharacterized LOC100506489	PREDICTED: Homo sapiens uncharacterized LOC100506489 (LOC100506489), ncRNA [XR_108799]	chr7:115319459-115319400	hs|7q31.2
1.7182	-1.7182	-0.780895	down	BEND5	BEN domain containing 5	Homo sapiens BEN domain containing 5 (BEND5), transcript variant 1, mRNA [NM_024603]	chr1:49201921-49193667	hs|1p33
1.71787	-1.71787	-0.78062	down	ALS2	amyotrophic lateral sclerosis 2 (juvenile)	amyotrophic lateral sclerosis 2 (juvenile) [Source:HGNC Symbol;Acc:HGNC:443] [ENST00000462747]	chr2:202630165-202630106	hs|2q33.1
1.7177	-1.7177	-0.780481	down	FOXRED1	FAD-dependent oxidoreductase domain containing 1	Homo sapiens FAD-dependent oxidoreductase domain containing 1 (FOXRED1), transcript variant 1, mRNA [NM_017547]	chr11:126145322-126145746	hs|11q24.2
1.71756	-1.71756	-0.780357	down	KCNQ5	potassium channel, voltage gated KQT-like subfamily Q, member 5	Homo sapiens potassium channel, voltage gated KQT-like subfamily Q, member 5 (KCNQ5), transcript variant 1, mRNA [NM_019842]	chr6:73905075-73905134	hs|6q13
1.71705	1.71705	0.779934	up	PRSS3	protease, serine, 3	Homo sapiens protease, serine, 3 (PRSS3), transcript variant 2, mRNA [NM_002771]	chr9:33797923-33797982	hs|9p13.3
1.7166	1.7166	0.779551	up	SIGMAR1	sigma non-opioid intracellular receptor 1	Homo sapiens sigma non-opioid intracellular receptor 1 (SIGMAR1), transcript variant 1, mRNA [NM_005866]	chr9:34635009-34634950	hs|9p13.3
1.71628	-1.71628	-0.779285	down	YPEL3	yippee-like 3 (Drosophila)	Homo sapiens yippee-like 3 (Drosophila) (YPEL3), transcript variant 1, mRNA [NM_031477]	chr16:30104106-30104047	hs|16p11.2
1.71613	1.71613	0.779158	up	SATB1-AS1	SATB1 antisense RNA 1	Homo sapiens SATB1 antisense RNA 1 (SATB1-AS1), long non-coding RNA [NR_125803]	chr3:18567930-18567989	hs|3p24.3
1.71598	-1.71598	-0.779032	down	SNX29	sorting nexin 29	Homo sapiens sorting nexin 29, mRNA (cDNA clone IMAGE:5177668), partial cds. [BC029857]	chr16:12621134-12621193	hs|16p13.12
1.71591	-1.71591	-0.778974	down	CEMIP	cell migration inducing protein, hyaluronan binding	Homo sapiens cell migration inducing protein, hyaluronan binding (CEMIP), transcript variant 3, mRNA [NM_018689]	chr15:81243634-81243693	hs|15q25.1
1.71589	1.71589	0.778961	up	PECAM1	platelet/endothelial cell adhesion molecule 1	Homo sapiens platelet/endothelial cell adhesion molecule 1 (PECAM1), mRNA [NM_000442]	chr17:62400731-62400672	hs|17q23.3
1.71584	-1.71584	-0.778911	down	PROM2	prominin 2	Homo sapiens prominin 2 (PROM2), transcript variant 1, mRNA [NM_001165978]	chr2:95956996-95957055	hs|2q11.1
1.71564	1.71564	0.778745	up	ASNS	asparagine synthetase (glutamine-hydrolyzing)	Homo sapiens asparagine synthetase (glutamine-hydrolyzing) (ASNS), transcript variant 2, mRNA [NM_001673]	chr7:97481520-97481461	hs|7q21.3
1.71527	-1.71527	-0.778436	down	UNC5C	unc-5 homolog C (C. elegans)	Homo sapiens unc-5 homolog C (C. elegans) (UNC5C), mRNA [NM_003728]	chr4:96089773-96089714	hs|4q22.3
1.7152	1.7152	0.77838	up	TNNT3	troponin T type 3 (skeletal, fast)	Homo sapiens troponin T type 3 (skeletal, fast) (TNNT3), transcript variant 3, mRNA [NM_001042780]	chr11:1956060-1956119	hs|11p15.5
1.71517	1.71517	0.778355	up	lnc-FAM71A-1	lnc-FAM71A-1:1	LNCipedia lincRNA (lnc-FAM71A-1), lincRNA [lnc-FAM71A-1:1]	chr1:212841029-212841088	hs|1q32.3
1.71507	1.71507	0.778265	up	PLAU	plasminogen activator, urokinase	Homo sapiens plasminogen activator, urokinase (PLAU), transcript variant 1, mRNA [NM_002658]	chr10:75677050-75677109	hs|10q22.2
1.71467	1.71467	0.77793	up	SPTLC3	serine palmitoyltransferase, long chain base subunit 3	Homo sapiens serine palmitoyltransferase, long chain base subunit 3 (SPTLC3), mRNA [NM_018327]	chr20:13029710-13029769	hs|20p12.1
1.71458	1.71458	0.777855	up	CXCR4	chemokine (C-X-C motif) receptor 4	Homo sapiens chemokine (C-X-C motif) receptor 4 (CXCR4), transcript variant 1, mRNA [NM_001008540]	chr2:136872012-136871953	hs|2q22.1
1.71448	-1.71448	-0.777775	down	NYNRIN	NYN domain and retroviral integrase containing	Homo sapiens NYN domain and retroviral integrase containing (NYNRIN), mRNA [NM_025081]	chr14:24878368-24878427	hs|14q12
1.71448	1.71448	0.777768	up	CLIC5	chloride intracellular channel 5	Homo sapiens chloride intracellular channel 5 (CLIC5), transcript variant 2, mRNA [NM_016929]	chr6:45869697-45869638	hs|6p21.1
1.71386	-1.71386	-0.777248	down	LAG3	lymphocyte-activation gene 3	Homo sapiens lymphocyte-activation gene 3 (LAG3), mRNA [NM_002286]	chr12:6887081-6887462	hs|12p13.31
1.71382	-1.71382	-0.777214	down	LINC01006	long intergenic non-protein coding RNA 1006	Homo sapiens long intergenic non-protein coding RNA 1006 (LINC01006), long non-coding RNA [NR_103858]	chr7:156265007-156264948	hs|7q36.3
1.7135	-1.7135	-0.776948	down	CRTC1	CREB regulated transcription coactivator 1	Homo sapiens CREB regulated transcription coactivator 1 (CRTC1), transcript variant 3, mRNA [NM_001098482]	chr19:18893076-18893135	hs|19p13.11
1.71332	1.71332	0.776792	up	HLA-DPA1	major histocompatibility complex, class II, DP alpha 1	Homo sapiens major histocompatibility complex, class II, DP alpha 1 (HLA-DPA1), transcript variant 1, mRNA [NM_033554]	chr6:33032907-33032848	hs|6p21.32
1.71324	1.71324	0.776727	up	LGSN	lengsin, lens protein with glutamine synthetase domain	Homo sapiens lengsin, lens protein with glutamine synthetase domain (LGSN), transcript variant 1, mRNA [NM_016571]	chr6:63990012-63989953	hs|6q12
1.71285	1.71285	0.776403	up	LINC01114	long intergenic non-protein coding RNA 1114	long intergenic non-protein coding RNA 1114 [Source:HGNC Symbol;Acc:HGNC:49245] [ENST00000421071]	chr2:105370913-105370854	hs|2q12.1
1.71243	1.71243	0.776043	up	SERPINB7	serpin peptidase inhibitor, clade B (ovalbumin), member 7	Homo sapiens serpin peptidase inhibitor, clade B (ovalbumin), member 7 (SERPINB7), transcript variant 2, mRNA [NM_001040147]	chr18:61471776-61471835	hs|18q21.33
1.7114	1.7114	0.775179	up	LOC101927490	uncharacterized LOC101927490	PREDICTED: Homo sapiens uncharacterized LOC101927490 (LOC101927490), ncRNA [XR_244728]	chr4:140539403-140539344	hs|4q31.1
1.71133	-1.71133	-0.775122	down	PIM1	Pim-1 proto-oncogene, serine/threonine kinase	Homo sapiens Pim-1 proto-oncogene, serine/threonine kinase (PIM1), transcript variant 1, mRNA [NM_002648]	chr6:37143102-37143161	hs|6p21.2
1.71122	1.71122	0.775029	up	C10orf90	chromosome 10 open reading frame 90	Homo sapiens chromosome 10 open reading frame 90 (C10orf90), mRNA [NM_001004298]	chr10:128113805-128113746	hs|10q26.2
1.71121	1.71121	0.77502	up	CRYM	crystallin, mu	Homo sapiens crystallin, mu (CRYM), mRNA [NM_001888]	chr16:21270022-21269963	hs|16p12.2
1.71106	1.71106	0.774887	up	HOOK1	hook microtubule-tethering protein 1	Homo sapiens hook microtubule-tethering protein 1 (HOOK1), mRNA [NM_015888]	chr1:60341230-60341289	hs|1p32.1
1.711	1.711	0.774836	up	CSMD1	CUB and Sushi multiple domains 1	Homo sapiens CUB and Sushi multiple domains 1 (CSMD1), mRNA [NM_033225]	chr8:2792959-2792900	hs|8p23.2
1.71043	1.71043	0.774359	up	lnc-ARFGEF2-2	lnc-ARFGEF2-2:1	Homo sapiens cDNA FLJ44031 fis, clone TESTI4027969. [AK126019]	chr20:47104488-47104547	hs|20q13.13
1.71041	1.71041	0.774343	up	CBS	cystathionine-beta-synthase	Homo sapiens cystathionine-beta-synthase (CBS), transcript variant 1, mRNA [NM_000071]	chr21:44473378-44473319	hs|21q22.3
1.71023	1.71023	0.774187	up	WFDC9	WAP four-disulfide core domain 9	Homo sapiens WAP four-disulfide core domain 9 (WFDC9), mRNA [NM_147198]	chr20:44236664-44236605	hs|20q13.12
1.71022	1.71022	0.774184	up	NRSN1	neurensin 1	neurensin 1 [Source:HGNC Symbol;Acc:HGNC:17881] [ENST00000378475]	chr6:24141344-24141403	hs|6p22.3
1.71021	-1.71021	-0.774176	down	MIATNB	MIAT neighbor (non-protein coding)	Homo sapiens MIAT neighbor (non-protein coding) (MIATNB), long non-coding RNA [NR_110543]	chr22:27172858-27172917	hs|22q12.1
1.71009	1.71009	0.774071	up	LINC00400	long intergenic non-protein coding RNA 400	Homo sapiens long intergenic non-protein coding RNA 400 (LINC00400), long non-coding RNA [NR_047013]	chr13:43733540-43733599	hs|13q14.11
1.71007	1.71007	0.774059	up	OR2J2	olfactory receptor, family 2, subfamily J, member 2	Homo sapiens olfactory receptor, family 2, subfamily J, member 2 (OR2J2), mRNA [NM_030905]	chr6:29141832-29141891	hs|6p22.1
1.70958	1.70958	0.773644	up	OR51A2	olfactory receptor, family 51, subfamily A, member 2	Homo sapiens olfactory receptor, family 51, subfamily A, member 2 (OR51A2), mRNA [NM_001004748]	chr11:4976305-4976246	hs|11p15.4
1.70933	1.70933	0.773432	up	LOC100507651	uncharacterized LOC100507651	Homo sapiens uncharacterized LOC100507651 (LOC100507651), long non-coding RNA [NR_038235]	chr8:58130851-58130910	hs|8q12.1
1.70904	-1.70904	-0.773187	down	LHCGR	luteinizing hormone/choriogonadotropin receptor	luteinizing hormone/choriogonadotropin receptor [Source:HGNC Symbol;Acc:HGNC:6585] [ENST00000477576]	chr2:48935968-48935909	hs|2p16.3
1.70887	-1.70887	-0.773046	down	MALL	mal, T-cell differentiation protein-like	Homo sapiens mal, T-cell differentiation protein-like (MALL), mRNA [NM_005434]	chr2:110841931-110841872	hs|2q13
1.70886	1.70886	0.773032	up	TMEM38B	transmembrane protein 38B	Homo sapiens transmembrane protein 38B (TMEM38B), mRNA [NM_018112]	chr9:108537196-108537255	hs|9q31.2
1.70884	1.70884	0.773021	up	LOC102724000	uncharacterized LOC102724000	Homo sapiens uncharacterized LOC102724000 (LOC102724000), long non-coding RNA [NR_121615]	chr6:72162733-72162792	hs|6q13
1.70864	1.70864	0.772851	up	SLC6A14	solute carrier family 6 (amino acid transporter), member 14	Homo sapiens solute carrier family 6 (amino acid transporter), member 14 (SLC6A14), mRNA [NM_007231]	chrX:115592195-115592254	hs|Xq23
1.70855	-1.70855	-0.772771	down	CCDC152	coiled-coil domain containing 152	Homo sapiens coiled-coil domain containing 152 (CCDC152), mRNA [NM_001134848]	chr5:42801648-42801707	hs|5p12
1.70802	-1.70802	-0.772322	down	CAMLG	calcium modulating ligand	Homo sapiens calcium modulating ligand (CAMLG), mRNA [NM_001745]	chr5:134087772-134087831	hs|5q31.1
1.70797	-1.70797	-0.772286	down	HSPB7	heat shock 27kDa protein family, member 7 (cardiovascular)	Homo sapiens heat shock 27kDa protein family, member 7 (cardiovascular) (HSPB7), mRNA [NM_014424]	chr1:16341448-16341389	hs|1p36.13
1.70795	1.70795	0.772268	up	CFAP53	cilia and flagella associated protein 53	Homo sapiens cilia and flagella associated protein 53 (CFAP53), mRNA [NM_145020]	chr18:47777299-47777240	hs|18q21.1
1.70787	-1.70787	-0.7722	down	JAG1	jagged 1	Homo sapiens jagged 1 (JAG1), mRNA [NM_000214]	chr20:10619120-10619061	hs|20p12.2
1.70778	1.70778	0.772123	up	ESX1	ESX homeobox 1	Homo sapiens ESX homeobox 1 (ESX1), mRNA [NM_153448]	chrX:103494909-103494850	hs|Xq22.2
1.70775	1.70775	0.7721	up	LOC101928325	uncharacterized LOC101928325	PREDICTED: Homo sapiens uncharacterized LOC101928325 (LOC101928325), ncRNA [XR_243591]	chr17:10784132-10784191	hs|17p12
1.70753	-1.70753	-0.771912	down	SMAD9	SMAD family member 9	Homo sapiens SMAD family member 9 (SMAD9), transcript variant a, mRNA [NM_001127217]	chr13:37419547-37419488	hs|13q13.3
1.70752	1.70752	0.7719	up	ZNF331	zinc finger protein 331	Homo sapiens zinc finger protein 331 (ZNF331), transcript variant 1, mRNA [NM_018555]	chr19:54025266-54025325	hs|19q13.42
1.70736	1.70736	0.771767	up	OR2B6	olfactory receptor, family 2, subfamily B, member 6	Homo sapiens olfactory receptor, family 2, subfamily B, member 6 (OR2B6), mRNA [NM_012367]	chr6:27925601-27925660	hs|6p22.1
1.70699	-1.70699	-0.771456	down	lnc-ZEB2-1	lnc-ZEB2-1:2	LNCipedia lincRNA (lnc-ZEB2-1), lincRNA [lnc-ZEB2-1:2]	chr2:145281222-145281163	hs|2q22.3
1.70685	-1.70685	-0.771338	down	DEFB113	defensin, beta 113	Homo sapiens defensin, beta 113 (DEFB113), mRNA [NM_001037729]	chr6:49936452-49936393	hs|6p12.3
1.70647	1.70647	0.771012	up	NFE4	nuclear factor, erythroid 4	Homo sapiens nuclear factor, erythroid 4 (NFE4), mRNA [NM_001085386]	chr7:102616617-102616676	hs|7q22.1
1.70627	1.70627	0.770846	up	EPB41L4B	erythrocyte membrane protein band 4.1 like 4B	Homo sapiens erythrocyte membrane protein band 4.1 like 4B (EPB41L4B), transcript variant 2, mRNA [NM_019114]	chr9:111934899-111934840	hs|9q31.3
1.70625	-1.70625	-0.770832	down	lnc-MYO19-1	lnc-MYO19-1:1	Homo sapiens mRNA; cDNA DKFZp564H213 (from clone DKFZp564H213). [AL049275]	chr17:34897703-34897644	hs|17q12
1.70624	1.70624	0.770823	up	HLA-DRB4	major histocompatibility complex, class II, DR beta 4	Homo sapiens major histocompatibility complex, class II, DR beta 4 (HLA-DRB4), mRNA [NM_021983]
1.7062	1.7062	0.770784	up	IFIT2	interferon-induced protein with tetratricopeptide repeats 2	Homo sapiens interferon-induced protein with tetratricopeptide repeats 2 (IFIT2), mRNA [NM_001547]	chr10:91068397-91068456	hs|10q23.31
1.70605	-1.70605	-0.770658	down	EFCC1	EF-hand and coiled-coil domain containing 1	Homo sapiens EF-hand and coiled-coil domain containing 1 (EFCC1), mRNA [NM_024768]	chr3:128759495-128759554	hs|3q21.3
1.70596	-1.70596	-0.770586	down	FMO5	flavin containing monooxygenase 5	Homo sapiens flavin containing monooxygenase 5 (FMO5), transcript variant 2, mRNA [NM_001144829]	chr1:146656056-146655997	hs|1q21.1
1.70557	1.70557	0.770254	up	S100A12	S100 calcium binding protein A12	Homo sapiens S100 calcium binding protein A12 (S100A12), mRNA [NM_005621]	chr1:153346293-153346234	hs|1q21.3
1.7047	1.7047	0.769521	up	SCTR	secretin receptor	Homo sapiens secretin receptor (SCTR), mRNA [NM_002980]	chr2:120210864-120209598	hs|2q14.2
1.70458	-1.70458	-0.769416	down	ULK2	unc-51 like autophagy activating kinase 2	Homo sapiens unc-51 like autophagy activating kinase 2 (ULK2), transcript variant 1, mRNA [NM_014683]	chr17:19674685-19674626	hs|17p11.2
1.70416	1.70416	0.76906	up	ADAMTS19	ADAM metallopeptidase with thrombospondin type 1 motif, 19	Homo sapiens ADAM metallopeptidase with thrombospondin type 1 motif, 19 (ADAMTS19), mRNA [NM_133638]	chr5:129074234-129074293	hs|5q23.3
1.70407	-1.70407	-0.768982	down	C2orf88	chromosome 2 open reading frame 88	Homo sapiens chromosome 2 open reading frame 88 (C2orf88), transcript variant 1, mRNA [NM_001042519]	chr2:191064495-191064554	hs|2q32.2
1.70394	-1.70394	-0.768877	down	EPYC	epiphycan	Homo sapiens epiphycan (EPYC), mRNA [NM_004950]	chr12:91365767-91365708	hs|12q21.33
1.70384	-1.70384	-0.768787	down	COL8A1	collagen, type VIII, alpha 1	Homo sapiens collagen, type VIII, alpha 1 (COL8A1), transcript variant 1, mRNA [NM_001850]	chr3:99514765-99514824	hs|3q12.1
1.70344	-1.70344	-0.768452	down	lnc-FZD1-1	lnc-FZD1-1:1	DB014480 TESOP2 Homo sapiens cDNA clone TESOP2003285 5', mRNA sequence [DB014480]	chr7:90917253-90919074	hs|7q21.13
1.70315	1.70315	0.768206	up	FAM167A	family with sequence similarity 167, member A	Homo sapiens family with sequence similarity 167, member A (FAM167A), mRNA [NM_053279]	chr8:11281586-11281527	hs|8p23.1
1.70299	-1.70299	-0.768067	down	SERPING1	serpin peptidase inhibitor, clade G (C1 inhibitor), member 1	Homo sapiens serpin peptidase inhibitor, clade G (C1 inhibitor), member 1 (SERPING1), transcript variant 1, mRNA [NM_000062]	chr11:57367490-57367549	hs|11q12.1
1.70269	-1.70269	-0.767816	down	SMC1B	structural maintenance of chromosomes 1B	Homo sapiens structural maintenance of chromosomes 1B (SMC1B), transcript variant 1, mRNA [NM_148674]	chr22:45740526-45740467	hs|22q13.31
1.70264	1.70264	0.767776	up	lnc-AFM-1	lnc-AFM-1:4	BX095211 Soares fetal liver spleen 1NFLS Homo sapiens cDNA clone IMAGp998P22654, mRNA sequence [BX095211]	chr4:74398786-74399663	hs|4q13.3
1.70252	1.70252	0.767669	up	E2F7	E2F transcription factor 7	Homo sapiens E2F transcription factor 7 (E2F7), mRNA [NM_203394]	chr12:77415579-77415520	hs|12q21.2
1.70214	-1.70214	-0.76735	down	LOC646976	uncharacterized LOC646976	PREDICTED: Homo sapiens uncharacterized LOC646976 (LOC646976), misc_RNA [XR_248659]	chr1:178693526-178693467	hs|1q25.2
1.70204	-1.70204	-0.767266	down	TENM3	teneurin transmembrane protein 3	Homo sapiens teneurin transmembrane protein 3 (TENM3), mRNA [NM_001080477]	chr4:183717844-183717903	hs|4q35.1
1.70189	-1.70189	-0.767138	down	MROH8	maestro heat-like repeat family member 8	Homo sapiens maestro heat-like repeat family member 8 (MROH8), transcript variant 2, mRNA [NM_213631]	chr20:35769618-35766368	hs|20q11.23
1.70183	-1.70183	-0.767084	down	LRRC15	leucine rich repeat containing 15	Homo sapiens leucine rich repeat containing 15 (LRRC15), transcript variant 2, mRNA [NM_130830]	chr3:194076556-194076497	hs|3q29
1.70164	-1.70164	-0.766922	down	GLI2	GLI family zinc finger 2	Homo sapiens GLI family zinc finger 2 (GLI2), mRNA [NM_005270]	chr2:121684982-121685041	hs|2q14.2
1.70106	-1.70106	-0.766432	down	SULF2	sulfatase 2	Homo sapiens sulfatase 2 (SULF2), transcript variant 1, mRNA [NM_018837]	chr20:46286483-46286424	hs|20q13.12
1.70078	1.70078	0.766192	up	REXO1L2P	REX1, RNA exonuclease 1 homolog (S. cerevisiae)-like 2 (pseudogene)	Homo sapiens REX1, RNA exonuclease 1 homolog (S. cerevisiae)-like 2 (pseudogene) (REXO1L2P), non-coding RNA [NR_003594]	chr8:86775512-86775453	hs|8q21.2
1.70077	1.70077	0.76619	up	TDRD10	tudor domain containing 10	Homo sapiens tudor domain containing 10 (TDRD10), transcript variant 2, mRNA [NM_182499]	chr1:154519893-154519952	hs|1q21.3
1.7007	1.7007	0.766128	up	SHANK2	SH3 and multiple ankyrin repeat domains 2	Homo sapiens SH3 and multiple ankyrin repeat domains 2 (SHANK2), transcript variant 1, mRNA [NM_012309]	chr11:70314422-70314363	hs|11q13.3
1.70036	-1.70036	-0.765838	down	NEIL1	nei endonuclease VIII-like 1 (E. coli)	Homo sapiens nei endonuclease VIII-like 1 (E. coli) (NEIL1), transcript variant 2, mRNA [NM_024608]	chr15:75647373-75647432	hs|15q24.2
1.70012	-1.70012	-0.765638	down	TMEM30B	transmembrane protein 30B	Homo sapiens transmembrane protein 30B (TMEM30B), mRNA [NM_001017970]	chr14:61744747-61744688	hs|14q23.1
1.69976	1.69976	0.765327	up	LOC102724747	ovostatin homolog 2-like	PREDICTED: Homo sapiens ovostatin homolog 2-like (LOC102724747), partial mRNA [XM_006719177]	chr12:9725688-9725964	hs|12p13.31
1.69965	1.69965	0.765241	up	ABCC3	ATP-binding cassette, sub-family C (CFTR/MRP), member 3	Homo sapiens ATP-binding cassette, sub-family C (CFTR/MRP), member 3 (ABCC3), transcript variant 1, mRNA [NM_003786]	chr17:48768701-48768760	hs|17q21.33
1.69962	1.69962	0.765211	up	RCVRN	recoverin	Homo sapiens recoverin (RCVRN), mRNA [NM_002903]	chr17:9801465-9801406	hs|17p13.1
1.69925	-1.69925	-0.764895	down	JAM2	junctional adhesion molecule 2	Homo sapiens junctional adhesion molecule 2 (JAM2), transcript variant 1, mRNA [NM_021219]	chr21:27087158-27087217	hs|21q21.3
1.6991	-1.6991	-0.764774	down	MAGI1	membrane associated guanylate kinase, WW and PDZ domain containing 1	Homo sapiens membrane associated guanylate kinase, WW and PDZ domain containing 1 (MAGI1), transcript variant 2, mRNA [NM_004742]	chr3:65345002-65344943	hs|3p14.1
1.69902	-1.69902	-0.764704	down	CTGF	connective tissue growth factor	Homo sapiens connective tissue growth factor (CTGF), mRNA [NM_001901]	chr6:132270189-132270130	hs|6q23.2
1.69887	-1.69887	-0.764578	down	GPC4	glypican 4	Homo sapiens glypican 4 (GPC4), mRNA [NM_001448]	chrX:132435488-132435429	hs|Xq26.2
1.69883	-1.69883	-0.764537	down	LINC01465	long intergenic non-protein coding RNA 1465	Homo sapiens long intergenic non-protein coding RNA 1465 (LINC01465), long non-coding RNA [NR_121682]	chr12:62996788-62996729	hs|12q14.1
1.69873	-1.69873	-0.764457	down	TSC22D3	TSC22 domain family, member 3	Homo sapiens TSC22 domain family, member 3 (TSC22D3), transcript variant 2, mRNA [NM_004089]	chrX:106956545-106956486	hs|Xq22.3
1.69869	-1.69869	-0.764423	down	COL19A1	collagen, type XIX, alpha 1	Homo sapiens collagen, type XIX, alpha 1 (COL19A1), mRNA [NM_001858]	chr6:70909326-70909385	hs|6q13
1.69853	-1.69853	-0.76429	down	GPR4	G protein-coupled receptor 4	Homo sapiens G protein-coupled receptor 4 (GPR4), mRNA [NM_005282]	chr19:46093270-46093211	hs|19q13.32
1.69845	-1.69845	-0.764222	down	LOC641510	uncharacterized LOC641510	Homo sapiens, mRNA (cDNA clone IMAGE:4713722). [BC030809]	chr4:71569761-71569702	hs|4q13.3
1.69839	1.69839	0.764172	up	FAM196B	family with sequence similarity 196, member B	Homo sapiens family with sequence similarity 196, member B (FAM196B), mRNA [NM_001129891]	chr5:169291336-169291277	hs|5q35.1
1.6983	-1.6983	-0.764088	down	SOCS2	suppressor of cytokine signaling 2	Homo sapiens suppressor of cytokine signaling 2 (SOCS2), transcript variant 1, mRNA [NM_003877]	chr12:93969799-93969858	hs|12q22
1.69821	-1.69821	-0.764013	down	PIGC	phosphatidylinositol glycan anchor biosynthesis, class C	phosphatidylinositol glycan anchor biosynthesis, class C [Source:HGNC Symbol;Acc:HGNC:8960] [ENST00000465374]	chr1:172345449-172345390	hs|1q24.3
1.69809	-1.69809	-0.76391	down	LOC729683	uncharacterized LOC729683	Homo sapiens uncharacterized LOC729683 (LOC729683), long non-coding RNA [NR_046273]	chr17:61779010-61779069	hs|17q23.3
1.69809	-1.69809	-0.763909	down	ZBED1	zinc finger, BED-type containing 1	Homo sapiens zinc finger, BED-type containing 1 (ZBED1), transcript variant 2, mRNA [NM_004729]	chrX:2405173-2405114	hs|Xp22.33
1.69799	-1.69799	-0.763832	down	BRIP1	BRCA1 interacting protein C-terminal helicase 1	Homo sapiens BRCA1 interacting protein C-terminal helicase 1 (BRIP1), mRNA [NM_032043]	chr17:59760967-59760908	hs|17q23.2
1.69789	1.69789	0.763741	up	PID1	phosphotyrosine interaction domain containing 1	Homo sapiens phosphotyrosine interaction domain containing 1 (PID1), transcript variant 1, mRNA [NM_017933]	chr2:229889030-229888971	hs|2q36.3
1.69778	-1.69778	-0.763651	down	FOXB2	forkhead box B2	Homo sapiens forkhead box B2 (FOXB2), mRNA [NM_001013735]	chr9:79635369-79635428	hs|9q21.2
1.69767	1.69767	0.763555	up	SMC2-AS1	SMC2 antisense RNA 1 (head to head)	Homo sapiens SMC2 antisense RNA 1 (head to head) (SMC2-AS1), long non-coding RNA [NR_121580]	chr9:106847291-106847232	hs|9q31.1
1.69763	1.69763	0.763521	up	MOGAT1	monoacylglycerol O-acyltransferase 1	Homo sapiens monoacylglycerol O-acyltransferase 1 (MOGAT1), mRNA [NM_058165]	chr2:223574531-223574590	hs|2q36.1
1.6974	-1.6974	-0.763328	down	LOC100505625	uncharacterized LOC100505625	Homo sapiens uncharacterized LOC100505625 (LOC100505625), long non-coding RNA [NR_103771]	chr5:6705334-6705275	hs|5p15.31
1.69694	-1.69694	-0.762933	down	KAZN	kazrin, periplakin interacting protein	Homo sapiens kazrin, periplakin interacting protein (KAZN), transcript variant A, mRNA [NM_015209]	chr1:15361246-15361305	hs|1p36.21
1.6968	-1.6968	-0.762818	down	PEAR1	platelet endothelial aggregation receptor 1	Homo sapiens platelet endothelial aggregation receptor 1 (PEAR1), mRNA [NM_001080471]	chr1:156885677-156885736	hs|1q23.1
1.69677	1.69677	0.762791	up	lnc-BAI1-1	lnc-BAI1-1:1	Homo sapiens hypothetical protein LOC286121, mRNA (cDNA clone IMAGE:4837614). [BC039302]	chr8:143488318-143488377	hs|8q24.3
1.69663	1.69663	0.762674	up	ATP1A2	ATPase, Na+/K+ transporting, alpha 2 polypeptide	Homo sapiens ATPase, Na+/K+ transporting, alpha 2 polypeptide (ATP1A2), mRNA [NM_000702]	chr1:160111276-160111335	hs|1q23.2
1.69657	1.69657	0.762617	up	OR52A1	olfactory receptor, family 52, subfamily A, member 1	Homo sapiens olfactory receptor, family 52, subfamily A, member 1 (OR52A1), mRNA [NM_012375]	chr11:5172991-5172932	hs|11p15.4
1.69589	1.69589	0.762043	up	PDZD7	PDZ domain containing 7	Homo sapiens PDZ domain containing 7 (PDZD7), transcript variant 2, mRNA [NM_024895]	chr10:102781582-102780404	hs|10q24.31
1.69588	1.69588	0.762031	up	ABLIM3	actin binding LIM protein family, member 3	Homo sapiens actin binding LIM protein family, member 3 (ABLIM3), transcript variant 2, mRNA [NM_014945]	chr5:148626089-148627383	hs|5q32
1.69551	-1.69551	-0.761721	down	UTRN	utrophin	Homo sapiens utrophin (UTRN), mRNA [NM_007124]	chr6:145173938-145173997	hs|6q24.2
1.69517	-1.69517	-0.761432	down	CCR10	chemokine (C-C motif) receptor 10	Homo sapiens chemokine (C-C motif) receptor 10 (CCR10), mRNA [NM_016602]	chr17:40831479-40831420	hs|17q21.2
1.69509	1.69509	0.761361	up	FLJ40039	uncharacterized LOC647662	Homo sapiens cDNA FLJ40039 fis, clone SYNOV2000397. [AK097358]	chrUn_gl000234:000035860-000035801
1.69488	1.69488	0.76118	up	ALOX15B	arachidonate 15-lipoxygenase, type B	Homo sapiens arachidonate 15-lipoxygenase, type B (ALOX15B), transcript variant d, mRNA [NM_001141]	chr17:7952182-7952241	hs|17p13.1
1.69486	-1.69486	-0.761167	down	CACNB2	calcium channel, voltage-dependent, beta 2 subunit	Homo sapiens calcium channel, voltage-dependent, beta 2 subunit (CACNB2), transcript variant 1, mRNA [NM_000724]	chr10:18829909-18829968	hs|10p12.31
1.69484	1.69484	0.76115	up	CXCL10	chemokine (C-X-C motif) ligand 10	Homo sapiens chemokine (C-X-C motif) ligand 10 (CXCL10), mRNA [NM_001565]	chr4:76942993-76942934	hs|4q21.1
1.69475	1.69475	0.761069	up	LOC728755	uncharacterized LOC728755	PREDICTED: Homo sapiens uncharacterized LOC728755 (LOC728755), misc_RNA [XR_110268]	chr14:27791265-27791206	hs|14q12
1.69465	1.69465	0.760989	up	STRIP2	striatin interacting protein 2	Homo sapiens striatin interacting protein 2 (STRIP2), transcript variant 1, mRNA [NM_020704]	chr7:129122721-129122780	hs|7q32.1
1.69449	-1.69449	-0.760852	down	PPL	periplakin	Homo sapiens periplakin (PPL), mRNA [NM_002705]	chr16:4933127-4933068	hs|16p13.3
1.69427	-1.69427	-0.760667	down	NET1	neuroepithelial cell transforming 1	Homo sapiens neuroepithelial cell transforming 1 (NET1), transcript variant 1, mRNA [NM_001047160]	chr10:5500236-5500295	hs|10p15.1
1.69425	-1.69425	-0.760645	down	KIAA1462	KIAA1462	Homo sapiens KIAA1462 (KIAA1462), mRNA [NM_020848]	chr10:30301839-30301780	hs|10p11.23
1.69359	-1.69359	-0.760086	down	DHDDS	dehydrodolichyl diphosphate synthase	dehydrodolichyl diphosphate synthase [Source:HGNC Symbol;Acc:HGNC:20603] [ENST00000374186]	chr1:26769455-26769514	hs|1p36.11
1.69359	1.69359	0.760084	up	TNFRSF21	tumor necrosis factor receptor superfamily, member 21	Homo sapiens tumor necrosis factor receptor superfamily, member 21 (TNFRSF21), mRNA [NM_014452]	chr6:47199542-47199483	hs|6p12.3
1.69344	1.69344	0.759958	up	LGR6	leucine-rich repeat containing G protein-coupled receptor 6	Homo sapiens leucine-rich repeat containing G protein-coupled receptor 6 (LGR6), transcript variant 1, mRNA [NM_001017403]	chr1:202288529-202288588	hs|1q32.1
1.69238	1.69238	0.759054	up	FXYD3	FXYD domain containing ion transport regulator 3	Homo sapiens FXYD domain containing ion transport regulator 3 (FXYD3), transcript variant 3, mRNA [NM_001136007]	chr19:35615163-35615222	hs|19q13.12
1.6921	1.6921	0.758813	up	FRG2	FSHD region gene 2	Homo sapiens FSHD region gene 2 (FRG2), transcript variant 2, mRNA [NM_001005217]	chr4:190946047-190945988	hs|4q35.2
1.69202	-1.69202	-0.758743	down	FGD4	FYVE, RhoGEF and PH domain containing 4	Homo sapiens FYVE, RhoGEF and PH domain containing 4 (FGD4), mRNA [NM_139241]	chr12:32786493-32786552	hs|12p11.21
1.69177	1.69177	0.758534	up	RECQL5	RecQ protein-like 5	Homo sapiens RecQ protein-like 5 (RECQL5), transcript variant 3, mRNA [NM_001003716]	chr17:73646506-73646447	hs|17q25.1
1.69169	1.69169	0.758469	up	MAGEA8	melanoma antigen family A, 8	Homo sapiens melanoma antigen family A, 8 (MAGEA8), transcript variant 3, mRNA [NM_005364]	chrX:149014198-149014257	hs|Xq28
1.69157	-1.69157	-0.758361	down	CCDC74A	coiled-coil domain containing 74A	Homo sapiens coiled-coil domain containing 74A (CCDC74A), transcript variant 2, mRNA [NM_001258304]	chr2:132285736-132285795	hs|2q21.1
1.69147	1.69147	0.758274	up	SLC6A9	solute carrier family 6 (neurotransmitter transporter, glycine), member 9	Homo sapiens solute carrier family 6 (neurotransmitter transporter, glycine), member 9 (SLC6A9), transcript variant 2, mRNA [NM_201649]	chr1:44462221-44462162	hs|1p34.1
1.69114	-1.69114	-0.757999	down	PHLDB2	pleckstrin homology-like domain, family B, member 2	Homo sapiens pleckstrin homology-like domain, family B, member 2, mRNA (cDNA clone IMAGE:5169755), complete cds. [BC038806]	chr3:111604399-111604458	hs|3q13.2
1.69069	1.69069	0.75761	up	PPIL6	peptidylprolyl isomerase (cyclophilin)-like 6	Homo sapiens peptidylprolyl isomerase (cyclophilin)-like 6 (PPIL6), transcript variant 4, mRNA [NM_001286361]	chr6:109748110-109748051	hs|6q21
1.69031	-1.69031	-0.757291	down	RIC3	RIC3 acetylcholine receptor chaperone	Homo sapiens RIC3 acetylcholine receptor chaperone (RIC3), transcript variant 1, mRNA [NM_024557]	chr11:8130728-8130669	hs|11p15.4
1.69031	-1.69031	-0.75729	down	ITGA7	integrin, alpha 7	Homo sapiens integrin, alpha 7 (ITGA7), transcript variant 2, mRNA [NM_002206]	chr12:56078479-56078420	hs|12q13.2
1.69025	-1.69025	-0.757233	down	PBX1	pre-B-cell leukemia homeobox 1	Homo sapiens pre-B-cell leukemia homeobox 1 (PBX1), transcript variant 1, mRNA [NM_002585]	chr1:164820976-164821035	hs|1q23.3
1.68992	-1.68992	-0.756954	down	ELN	elastin	Homo sapiens elastin (ELN), transcript variant 1, mRNA [NM_000501]	chr7:73474764-73474823	hs|7q11.23
1.68966	1.68966	0.756736	up	REXO1L2P	REX1, RNA exonuclease 1 homolog (S. cerevisiae)-like 2 (pseudogene)	Homo sapiens REX1, RNA exonuclease 1 homolog (S. cerevisiae)-like 2 (pseudogene) (REXO1L2P), non-coding RNA [NR_003594]	chr8:86775619-86775560	hs|8q21.2
1.68905	-1.68905	-0.756209	down	KAL1	Kallmann syndrome 1 sequence	Homo sapiens Kallmann syndrome 1 sequence (KAL1), mRNA [NM_000216]	chrX:8500896-8500837	hs|Xp22.31
1.68851	-1.68851	-0.75575	down	ZNF594	zinc finger protein 594	Homo sapiens zinc finger protein 594 (ZNF594), mRNA [NM_032530]	chr17:5082968-5082909	hs|17p13.2
1.68844	1.68844	0.755694	up	LOC101927244	uncharacterized LOC101927244	Homo sapiens uncharacterized LOC101927244 (LOC101927244), long non-coding RNA [NR_125938]	chr1:71252027-71252086	hs|1p31.1
1.68834	1.68834	0.755604	up	PPARGC1B	peroxisome proliferator-activated receptor gamma, coactivator 1 beta	Homo sapiens peroxisome proliferator-activated receptor gamma, coactivator 1 beta (PPARGC1B), transcript variant 1, mRNA [NM_133263]	chr5:149234475-149234534	hs|5q32
1.68778	1.68778	0.755124	up	PLA2G7	phospholipase A2, group VII (platelet-activating factor acetylhydrolase, plasma)	Homo sapiens phospholipase A2, group VII (platelet-activating factor acetylhydrolase, plasma) (PLA2G7), transcript variant 1, mRNA [NM_005084]	chr6:46672900-46672385	hs|6p12.3
1.68763	-1.68763	-0.755002	down	lnc-PRB1-1	lnc-PRB1-1:5	LNCipedia lincRNA (lnc-PRB1-1), lincRNA [lnc-PRB1-1:5]	chr12:11583204-11583145	hs|12p13.2
1.6876	-1.6876	-0.754972	down	HAS3	hyaluronan synthase 3	Homo sapiens hyaluronan synthase 3 (HAS3), transcript variant 1, mRNA [NM_005329]	chr16:69151369-69151428	hs|16q22.1
1.6876	-1.6876	-0.75497	down	STON1-GTF2A1L	STON1-GTF2A1L readthrough	Homo sapiens STON1-GTF2A1L readthrough (STON1-GTF2A1L), transcript variant 2, mRNA [NM_001198593]	chr2:48896919-48896978	hs|2p16.3
1.68756	1.68756	0.754937	up	DAOA	D-amino acid oxidase activator	Homo sapiens D-amino acid oxidase activator (DAOA), transcript variant 1, mRNA [NM_172370]	chr13:106143267-106143326	hs|13q33.2
1.68749	-1.68749	-0.754877	down	CNN1	calponin 1, basic, smooth muscle	Homo sapiens calponin 1, basic, smooth muscle (CNN1), mRNA [NM_001299]	chr19:11661005-11661064	hs|19p13.2
1.6874	-1.6874	-0.754801	down	IDH2	isocitrate dehydrogenase 2 (NADP+), mitochondrial	Homo sapiens isocitrate dehydrogenase 2 (NADP+), mitochondrial (IDH2), transcript variant 1, mRNA [NM_002168]	chr15:90630706-90630472	hs|15q26.1
1.6873	1.6873	0.754719	up	PSG9	pregnancy specific beta-1-glycoprotein 9	Homo sapiens pregnancy specific beta-1-glycoprotein 9 (PSG9), transcript variant 1, mRNA [NM_002784]	chr19:43757790-43757731	hs|19q13.31
1.68672	-1.68672	-0.754219	down	RFTN1	raftlin, lipid raft linker 1	Homo sapiens raftlin, lipid raft linker 1 (RFTN1), mRNA [NM_015150]	chr3:16357514-16357455	hs|3p25.1
1.68649	-1.68649	-0.754025	down	ST5	suppression of tumorigenicity 5	Homo sapiens suppression of tumorigenicity 5 (ST5), transcript variant 1, mRNA [NM_005418]	chr11:8752010-8751951	hs|11p15.4
1.68647	1.68647	0.754007	up	lnc-NT5DC1-4	lnc-NT5DC1-4:1	ENW1_GORGO (P61561) ERV-W1 provirus ancestral Env polyprotein precursor (Envelope polyprotein) (ERVWE1 envelope protein) (Syncytin) (Syncytin-1) [Contains: Surface protein (SU); Transmembrane protein (TM)], partial (4%) [THC2725080]	chr6:115323097-115323156	hs|6q22.1
1.68625	1.68625	0.753815	up	STOX1	storkhead box 1	Homo sapiens storkhead box 1 (STOX1), transcript variant 1, mRNA [NM_152709]	chr10:70652436-70652495	hs|10q22.1
1.68617	-1.68617	-0.753748	down	ABHD16B	abhydrolase domain containing 16B	Homo sapiens abhydrolase domain containing 16B (ABHD16B), mRNA [NM_080622]	chr20:62494280-62494339	hs|20q13.33
1.68598	-1.68598	-0.75359	down	SCIMP	SLP adaptor and CSK interacting membrane protein	SLP adaptor and CSK interacting membrane protein [Source:HGNC Symbol;Acc:HGNC:33504] [ENST00000571800]	chr17:5116499-5116440	hs|17p13.2
1.68587	-1.68587	-0.753493	down	CDKN2C	cyclin-dependent kinase inhibitor 2C (p18, inhibits CDK4)	Homo sapiens cyclin-dependent kinase inhibitor 2C (p18, inhibits CDK4) (CDKN2C), transcript variant 2, mRNA [NM_078626]	chr1:51439963-51440022	hs|1p32.3
1.68574	1.68574	0.753379	up	DOC2B	double C2-like domains, beta	Homo sapiens double C2-like domains, beta (DOC2B), mRNA [NM_003585]	chr17:5141-5082	hs|17p13.3
1.68553	1.68553	0.753202	up	PARVG	parvin, gamma	Homo sapiens parvin, gamma (PARVG), transcript variant 1, mRNA [NM_022141]	chr22:44594525-44594584	hs|22q13.31
1.68553	1.68553	0.7532	up	TSPAN7	tetraspanin 7	Homo sapiens tetraspanin 7 (TSPAN7), mRNA [NM_004615]	chrX:38546881-38547204	hs|Xp11.4
1.68553	-1.68553	-0.753199	down	C1QTNF5	C1q and tumor necrosis factor related protein 5	Homo sapiens C1q and tumor necrosis factor related protein 5 (C1QTNF5), transcript variant 1, mRNA [NM_015645]	chr11:119209954-119209895	hs|11q23.3
1.68529	-1.68529	-0.752996	down	PCSK7	proprotein convertase subtilisin/kexin type 7	Homo sapiens proprotein convertase subtilisin/kexin type 7 (PCSK7), mRNA [NM_004716]	chr11:117076653-117076594	hs|11q23.3
1.68518	-1.68518	-0.752904	down	FBRSL1	fibrosin-like 1	fibrosin-like 1 [Source:HGNC Symbol;Acc:HGNC:29308] [ENST00000542061]	chr12:133088473-133088532	hs|12q24.33
1.68498	-1.68498	-0.752729	down	SCN3A	sodium channel, voltage gated, type III alpha subunit	Homo sapiens sodium channel, voltage gated, type III alpha subunit (SCN3A), transcript variant 1, mRNA [NM_006922]	chr2:165946977-165946918	hs|2q24.3
1.68497	1.68497	0.752726	up	LOC101926975	uncharacterized LOC101926975	Homo sapiens uncharacterized LOC101926975 (LOC101926975), long non-coding RNA [NR_110558]	chr5:142138741-142138800	hs|5q31.3
1.68468	-1.68468	-0.752473	down	lnc-OLFML2A-1	lnc-OLFML2A-1:1	Q8NE53_HUMAN (Q8NE53) Zinedin, partial (3%) [THC2628554]	chr9:127534036-127535023	hs|9q33.3
1.68461	1.68461	0.752411	up	PLAC8L1	PLAC8-like 1	Homo sapiens PLAC8-like 1 (PLAC8L1), mRNA [NM_001029869]	chr5:145464038-145463979	hs|5q32
1.68449	1.68449	0.752315	up	WNT8A	wingless-type MMTV integration site family, member 8A	Homo sapiens wingless-type MMTV integration site family, member 8A (WNT8A), transcript variant 3, mRNA [NM_058244]	chr5:137424651-137424710	hs|5q31.2
1.68395	1.68395	0.751849	up	LOC100506937	uncharacterized LOC100506937	PREDICTED: Homo sapiens uncharacterized LOC100506937 (LOC100506937), ncRNA [XR_108820]	chr7:132445290-132445349	hs|7q32.3
1.68377	-1.68377	-0.751693	down	RABGAP1	RAB GTPase activating protein 1	Homo sapiens RAB GTPase activating protein 1 (RABGAP1), mRNA [NM_012197]	chr9:125866353-125866412	hs|9q33.3
1.68364	1.68364	0.751584	up	lnc-THTPA-3	lnc-THTPA-3:1	CN120_HUMAN (Q8NEJ9) Protein C14orf120, partial (21%) [THC2621067]	chr14:23978738-23978797	hs|14q11.2
1.68281	-1.68281	-0.750869	down	STARD9	StAR-related lipid transfer (START) domain containing 9	Homo sapiens StAR-related lipid transfer (START) domain containing 9 (STARD9), mRNA [NM_020759]	chr15:42961534-42967028	hs|15q15.2
1.68275	-1.68275	-0.750819	down	THBS1	thrombospondin 1	Homo sapiens thrombospondin 1 (THBS1), mRNA [NM_003246]	chr15:39888831-39888890	hs|15q14
1.68269	1.68269	0.750769	up	AOC3	amine oxidase, copper containing 3	Homo sapiens amine oxidase, copper containing 3 (AOC3), transcript variant 1, mRNA [NM_003734]	chr17:41009891-41009950	hs|17q21.31
1.6825	1.6825	0.750605	up	lnc-ZNF138-1	lnc-ZNF138-1:1	LNCipedia lincRNA (lnc-ZNF138-1), lincRNA [lnc-ZNF138-1:1]	chr7:64340061-64340120	hs|7q11.21
1.68231	-1.68231	-0.750444	down	TLE4	transducin-like enhancer of split 4	transducin-like enhancer of split 4 [Source:HGNC Symbol;Acc:HGNC:11840] [ENST00000461758]	chr9:82191102-82191161	hs|9q21.31
1.68227	1.68227	0.750409	up	TMEM255B	transmembrane protein 255B	Homo sapiens transmembrane protein 255B (TMEM255B), mRNA [NM_182614]	chr13:114503825-114503884	hs|13q34
1.68188	-1.68188	-0.750078	down	PRO1804	uncharacterized LOC100133319	Homo sapiens PRO1804 mRNA, complete cds. [AF132201]	chr17:67229991-67229932	hs|17q24.3
1.68182	-1.68182	-0.750027	down	TTC28	tetratricopeptide repeat domain 28	Homo sapiens tetratricopeptide repeat domain 28 (TTC28), mRNA [NM_001145418]	chr22:28693823-28693764	hs|22q12.1
1.68159	-1.68159	-0.749825	down	LRRC1	leucine rich repeat containing 1	Homo sapiens leucine rich repeat containing 1 (LRRC1), mRNA [NM_018214]	chr6:53747702-53747761	hs|6p12.1
1.68136	1.68136	0.749628	up	C3orf56	chromosome 3 open reading frame 56	Homo sapiens chromosome 3 open reading frame 56 (C3orf56), mRNA [NM_001007534]	chr3:126916947-126917006	hs|3q21.3
1.68107	1.68107	0.749384	up	TRIM77	tripartite motif containing 77	Homo sapiens tripartite motif containing 77 (TRIM77), transcript variant 1, mRNA [NM_001146162]	chr11:89450972-89451031	hs|11q14.3
1.68093	1.68093	0.749263	up	SIRPG	signal-regulatory protein gamma	Homo sapiens signal-regulatory protein gamma (SIRPG), transcript variant 1, mRNA [NM_018556]	chr20:1609978-1609919	hs|20p13
1.6809	-1.6809	-0.749233	down	TMPO	thymopoietin	Homo sapiens thymopoietin (TMPO), transcript variant 2, mRNA [NM_001032283]	chr12:98942332-98942391	hs|12q23.1
1.68085	-1.68085	-0.749194	down	GRIN2D	glutamate receptor, ionotropic, N-methyl D-aspartate 2D	Homo sapiens glutamate receptor, ionotropic, N-methyl D-aspartate 2D (GRIN2D), mRNA [NM_000836]	chr19:48948128-48948187	hs|19q13.33
1.68085	-1.68085	-0.749192	down	TMEM64	transmembrane protein 64	Homo sapiens transmembrane protein 64 (TMEM64), transcript variant 1, mRNA [NM_001008495]	chr8:91634707-91634648	hs|8q21.3
1.68068	-1.68068	-0.749042	down	TMEM150C	transmembrane protein 150C	Homo sapiens transmembrane protein 150C (TMEM150C), mRNA [NM_001080506]	chr4:83405845-83405786	hs|4q21.22
1.68054	1.68054	0.748926	up	CYFIP2	cytoplasmic FMR1 interacting protein 2	Homo sapiens cytoplasmic FMR1 interacting protein 2 (CYFIP2), transcript variant 3, mRNA [NM_014376]	chr5:156822135-156822194	hs|5q33.3
1.68044	-1.68044	-0.748843	down	FAM122C	family with sequence similarity 122C	Homo sapiens family with sequence similarity 122C (FAM122C), transcript variant 2, mRNA [NM_138819]	chrX:133988488-133988547	hs|Xq26.3
1.68041	-1.68041	-0.748814	down	PRRT4	proline-rich transmembrane protein 4	Homo sapiens proline-rich transmembrane protein 4 (PRRT4), transcript variant 1, mRNA [NM_001174164]	chr7:127990466-127990407	hs|7q32.1
1.68024	1.68024	0.74867	up	IQCJ	IQ motif containing J	Homo sapiens IQ motif containing J (IQCJ), transcript variant 1, mRNA [NM_001042705]	chr3:158983432-158983491	hs|3q25.32
1.6801	-1.6801	-0.748548	down	ARFRP1	ADP-ribosylation factor related protein 1	Homo sapiens ADP-ribosylation factor related protein 1 (ARFRP1), transcript variant 8, mRNA [NM_001267549]	chr20:62330066-62330007	hs|20q13.33
1.67997	1.67997	0.748431	up	MNDA	myeloid cell nuclear differentiation antigen	Homo sapiens myeloid cell nuclear differentiation antigen (MNDA), mRNA [NM_002432]	chr1:158817667-158818999	hs|1q23.1
1.67995	1.67995	0.748421	up	CTSC	cathepsin C	Homo sapiens cathepsin C (CTSC), transcript variant 1, mRNA [NM_001814]	chr11:88042347-88033771	hs|11q14.2
1.67984	1.67984	0.748322	up	lnc-GLIPR1L1-1	lnc-GLIPR1L1-1:4	LNCipedia lincRNA (lnc-GLIPR1L1-1), lincRNA [lnc-GLIPR1L1-1:4]	chr12:75654394-75654453	hs|12q21.1
1.67976	1.67976	0.748258	up	LGSN	lengsin, lens protein with glutamine synthetase domain	Homo sapiens lengsin, lens protein with glutamine synthetase domain (LGSN), transcript variant 1, mRNA [NM_016571]	chr6:63989680-63989621	hs|6q12
1.67956	-1.67956	-0.748084	down	LIMCH1	LIM and calponin homology domains 1	Homo sapiens LIM and calponin homology domains 1 (LIMCH1), transcript variant 1, mRNA [NM_014988]	chr4:41700725-41700784	hs|4p13
1.67948	1.67948	0.748013	up	HLA-DQA1	major histocompatibility complex, class II, DQ alpha 1	Homo sapiens major histocompatibility complex, class II, DQ alpha 1 (HLA-DQA1), mRNA [NM_002122]	chr6:32610501-32610560	hs|6p21.32
1.67936	1.67936	0.747908	up	lnc-ARFGEF2-2	lnc-ARFGEF2-2:7	LNCipedia lincRNA (lnc-ARFGEF2-2), lincRNA [lnc-ARFGEF2-2:7]	chr20:47133327-47133386	hs|20q13.13
1.67903	-1.67903	-0.74763	down	WISP2	WNT1 inducible signaling pathway protein 2	Homo sapiens WNT1 inducible signaling pathway protein 2 (WISP2), mRNA [NM_003881]	chr20:43356347-43356406	hs|20q13.12
1.67862	1.67862	0.747274	up	TAAR9	trace amine associated receptor 9 (gene/pseudogene)	Homo sapiens trace amine associated receptor 9 (gene/pseudogene) (TAAR9), mRNA [NM_175057]	chr6:132860370-132860429	hs|6q23.2
1.67858	-1.67858	-0.747239	down	lnc-FRMD4B-2	lnc-FRMD4B-2:2	LNCipedia lincRNA (lnc-FRMD4B-2), lincRNA [lnc-FRMD4B-2:2]	chr3:70246149-70246090	hs|3p13
1.67857	-1.67857	-0.747231	down	LSS	lanosterol synthase (2,3-oxidosqualene-lanosterol cyclase)	Homo sapiens lanosterol synthase (2,3-oxidosqualene-lanosterol cyclase) (LSS), transcript variant 2, mRNA [NM_001001438]	chr21:47608626-47608567	hs|21q22.3
1.67853	-1.67853	-0.7472	down	ABLIM1	actin binding LIM protein 1	Homo sapiens actin binding LIM protein 1 (ABLIM1), transcript variant 3, mRNA [NM_001003408]	chr10:116190950-116190891	hs|10q25.3
1.6785	1.6785	0.747171	up	CBLN2	cerebellin 2 precursor	Homo sapiens cerebellin 2 precursor (CBLN2), mRNA [NM_182511]	chr18:70204192-70204133	hs|18q22.3
1.67848	-1.67848	-0.747154	down	ACVR2A	activin A receptor, type IIA	Homo sapiens activin A receptor, type IIA (ACVR2A), transcript variant 2, mRNA [NM_001616]	chr2:148684923-148684982	hs|2q22.3
1.67825	-1.67825	-0.746956	down	CTSF	cathepsin F	Homo sapiens cathepsin F (CTSF), mRNA [NM_003793]	chr11:66331002-66330943	hs|11q13.2
1.67818	1.67818	0.746895	up	SH2D4B	SH2 domain containing 4B	Homo sapiens SH2 domain containing 4B (SH2D4B), transcript variant 1, mRNA [NM_207372]	chr10:82405626-82405685	hs|10q23.1
1.67811	-1.67811	-0.746836	down	PRR5L	proline rich 5 like	Homo sapiens proline rich 5 like (PRR5L), transcript variant 2, mRNA [NM_024841]	chr11:36486438-36486497	hs|11p12
1.67785	-1.67785	-0.746616	down	FBN1	fibrillin 1	Homo sapiens fibrillin 1 (FBN1), mRNA [NM_000138]	chr15:48700564-48700505	hs|15q21.1
1.67776	1.67776	0.746535	up	PCDH15	protocadherin-related 15	Homo sapiens protocadherin-related 15 (PCDH15), transcript variant K, mRNA [NM_001142771]	chr10:55562723-55562664	hs|10q21.1
1.67763	-1.67763	-0.746425	down	CHPF	chondroitin polymerizing factor	Homo sapiens chondroitin polymerizing factor (CHPF), transcript variant 1, mRNA [NM_024536]	chr2:220403737-220403678	hs|2q35
1.67737	1.67737	0.746197	up	LINC00114	long intergenic non-protein coding RNA 114	long intergenic non-protein coding RNA 114 [Source:HGNC Symbol;Acc:HGNC:1265] [ENST00000411989]	chr21:40113325-40113266	hs|21q22.2
1.67723	-1.67723	-0.746077	down	lnc-PPIA-1	lnc-PPIA-1:4	LNCipedia lincRNA (lnc-PPIA-1), lincRNA [lnc-PPIA-1:4]	chr7:44889105-44889164	hs|7p13
1.67722	-1.67722	-0.746069	down	KIAA1614	KIAA1614	Homo sapiens KIAA1614 (KIAA1614), mRNA [NM_020950]	chr1:180913533-180913592	hs|1q25.3
1.6772	1.6772	0.746054	up	HLA-DPB1	major histocompatibility complex, class II, DP beta 1	Homo sapiens major histocompatibility complex, class II, DP beta 1 (HLA-DPB1), mRNA [NM_002121]	chr6:33052981-33053587	hs|6p21.32
1.67703	-1.67703	-0.745911	down	HIST2H2BF	histone cluster 2, H2bf	Homo sapiens histone cluster 2, H2bf (HIST2H2BF), transcript variant 1, mRNA [NM_001024599]	chr1:149783617-149783558	hs|1q21.2
1.67695	1.67695	0.745841	up	RHOH	ras homolog family member H	Homo sapiens ras homolog family member H (RHOH), transcript variant 6, mRNA [NM_004310]	chr4:40245659-40245718	hs|4p14
1.67677	-1.67677	-0.745686	down	KCNAB1	potassium channel, voltage gated subfamily A regulatory beta subunit 1	Homo sapiens potassium channel, voltage gated subfamily A regulatory beta subunit 1 (KCNAB1), transcript variant 2, mRNA [NM_003471]	chr3:156255847-156255906	hs|3q25.31
1.67662	1.67662	0.745558	up	MPV17L	MPV17 mitochondrial membrane protein-like	Homo sapiens MPV17 mitochondrial membrane protein-like (MPV17L), transcript variant 2, mRNA [NM_173803]	chr16:15501797-15501856	hs|16p13.11
1.67657	1.67657	0.745511	up	LINC00867	long intergenic non-protein coding RNA 867	Homo sapiens long intergenic non-protein coding RNA 867 (LINC00867), long non-coding RNA [NR_108045]	chr10:120118617-120118676	hs|10q26.11
1.67636	-1.67636	-0.745333	down	FAM76A	family with sequence similarity 76, member A	Homo sapiens family with sequence similarity 76, member A (FAM76A), transcript variant 1, mRNA [NM_001143912]	chr1:28089083-28089142	hs|1p35.3
1.67606	1.67606	0.745076	up	PGA4	pepsinogen 4, group I (pepsinogen A)	pepsinogen 4, group I (pepsinogen A) [Source:HGNC Symbol;Acc:HGNC:8886] [ENST00000624544]	chr11:60997300-60997359	hs|11q12.2
1.67606	-1.67606	-0.745071	down	LINC00472	long intergenic non-protein coding RNA 472	Homo sapiens long intergenic non-protein coding RNA 472 (LINC00472), transcript variant 1, long non-coding RNA [NR_121612]	chr6:72128400-72127096	hs|6q13
1.67604	-1.67604	-0.745059	down	LRRC4	leucine rich repeat containing 4	Homo sapiens leucine rich repeat containing 4 (LRRC4), mRNA [NM_022143]	chr7:127667209-127667150	hs|7q32.1
1.67586	-1.67586	-0.744902	down	POPDC2	popeye domain containing 2	Homo sapiens popeye domain containing 2 (POPDC2), mRNA [NM_022135]	chr3:119367412-119367353	hs|3q13.33
1.67586	-1.67586	-0.744901	down	DSP	desmoplakin	Homo sapiens desmoplakin (DSP), transcript variant 1, mRNA [NM_004415]	chr6:7586582-7586641	hs|6p24.3
1.67581	1.67581	0.744857	up	KCNMA1	potassium channel, calcium activated large conductance subfamily M alpha, member 1	Homo sapiens potassium channel, calcium activated large conductance subfamily M alpha, member 1 (KCNMA1), transcript variant 2, mRNA [NM_002247]	chr10:78846275-78844448	hs|10q22.3
1.67576	1.67576	0.744817	up	STAT4	signal transducer and activator of transcription 4	Homo sapiens signal transducer and activator of transcription 4 (STAT4), transcript variant 1, mRNA [NM_003151]	chr2:191895762-191895703	hs|2q32.2
1.67563	-1.67563	-0.744707	down	FGFR3	fibroblast growth factor receptor 3	Homo sapiens fibroblast growth factor receptor 3 (FGFR3), transcript variant 1, mRNA [NM_000142]	chr4:1810363-1810422	hs|4p16.3
1.67535	-1.67535	-0.744459	down	METTL6	methyltransferase like 6	Homo sapiens methyltransferase like 6 (METTL6), transcript variant 1, mRNA [NM_152396]	chr3:15451443-15451384	hs|3p25.1
1.67453	-1.67453	-0.74376	down	TMEFF2	transmembrane protein with EGF-like and two follistatin-like domains 2	Homo sapiens transmembrane protein with EGF-like and two follistatin-like domains 2 (TMEFF2), mRNA [NM_016192]	chr2:192815005-192814946	hs|2q32.3
1.67441	1.67441	0.743653	up	GLYAT	glycine-N-acyltransferase	Homo sapiens glycine-N-acyltransferase (GLYAT), transcript variant 2, mRNA [NM_005838]	chr11:58477744-58477685	hs|11q12.1
1.6744	-1.6744	-0.743647	down	LPCAT3	lysophosphatidylcholine acyltransferase 3	Homo sapiens lysophosphatidylcholine acyltransferase 3 (LPCAT3), mRNA [NM_005768]	chr12:7085411-7085352	hs|12p13.31
1.67424	-1.67424	-0.743506	down	DNAJC16	DnaJ (Hsp40) homolog, subfamily C, member 16	DnaJ (Hsp40) homolog, subfamily C, member 16 [Source:HGNC Symbol;Acc:HGNC:29157] [ENST00000375849]	chr1:15902181-15902240	hs|1p36.21
1.67422	-1.67422	-0.743493	down	CCDC74B	coiled-coil domain containing 74B	Homo sapiens coiled-coil domain containing 74B (CCDC74B), transcript variant 1, mRNA [NM_207310]	chr2:130897033-130896974	hs|2q21.1
1.6742	1.6742	0.74347	up	PIK3CG	phosphatidylinositol-4,5-bisphosphate 3-kinase, catalytic subunit gamma	Homo sapiens phosphatidylinositol-4,5-bisphosphate 3-kinase, catalytic subunit gamma (PIK3CG), transcript variant 1, mRNA [NM_002649]	chr7:106547292-106547351	hs|7q22.3
1.67415	-1.67415	-0.743432	down	STARD9	StAR-related lipid transfer (START) domain containing 9	Homo sapiens StAR-related lipid transfer (START) domain containing 9 (STARD9), mRNA [NM_020759]	chr15:43012226-43012285	hs|15q15.2
1.67372	-1.67372	-0.743054	down	ZNF169	zinc finger protein 169	Homo sapiens zinc finger protein 169 (ZNF169), transcript variant 3, mRNA [NM_001301275]	chr9:97063672-97063731	hs|9q22.32
1.67349	-1.67349	-0.742863	down	PCDH19	protocadherin 19	Homo sapiens protocadherin 19 (PCDH19), transcript variant 3, mRNA [NM_001184880]	chrX:99550965-99550906	hs|Xq22.1
1.67346	-1.67346	-0.742837	down	TLE4	transducin-like enhancer of split 4	transducin-like enhancer of split 4 [Source:HGNC Symbol;Acc:HGNC:11840] [ENST00000376525]	chr9:82189883-82189942	hs|9q21.31
1.67346	1.67346	0.742834	up	AFF3	AF4/FMR2 family, member 3	Homo sapiens AF4/FMR2 family, member 3 (AFF3), transcript variant 1, mRNA [NM_002285]	chr2:100163795-100163736	hs|2q11.2
1.67293	-1.67293	-0.742375	down	PCDH18	protocadherin 18	Homo sapiens protocadherin 18 (PCDH18), transcript variant 1, mRNA [NM_019035]	chr4:138440160-138440101	hs|4q28.3
1.67255	1.67255	0.742047	up	lnc-EGLN1-1	lnc-EGLN1-1:6	LNCipedia lincRNA (lnc-EGLN1-1), lincRNA [lnc-EGLN1-1:6]	chr1:231663140-231658381	hs|1q42.2
1.67221	1.67221	0.741756	up	TMPRSS11D	transmembrane protease, serine 11D	Homo sapiens transmembrane protease, serine 11D (TMPRSS11D), mRNA [NM_004262]	chr4:68686678-68686619	hs|4q13.2
1.6721	-1.6721	-0.741663	down	HOTAIR	HOX transcript antisense RNA	Homo sapiens HOX transcript antisense RNA (HOTAIR), transcript variant 3, long non-coding RNA [NR_047518]	chr12:54362652-54362593	hs|12q13.13
1.67171	1.67171	0.741323	up	CATSPERB	catsper channel auxiliary subunit beta	Homo sapiens catsper channel auxiliary subunit beta (CATSPERB), mRNA [NM_024764]	chr14:92054338-92053578	hs|14q32.12
1.67171	-1.67171	-0.741321	down	lnc-ADI1-1	lnc-ADI1-1:1	ALU1_HUMAN (P39188) Alu subfamily J sequence contamination warning entry, partial (17%) [THC2638758]	chr2:3485111-3485052	hs|2p25.3
1.67166	-1.67166	-0.741285	down	C12orf76	chromosome 12 open reading frame 76	chromosome 12 open reading frame 76 [Source:HGNC Symbol;Acc:HGNC:33790] [ENST00000548936]	chr12:110511287-110511228	hs|12q24.11
1.67129	1.67129	0.74096	up	HAO1	hydroxyacid oxidase (glycolate oxidase) 1	Homo sapiens hydroxyacid oxidase (glycolate oxidase) 1 (HAO1), mRNA [NM_017545]	chr20:7863975-7863916	hs|20p12.3
1.67086	-1.67086	-0.740591	down	PTGFR	prostaglandin F receptor (FP)	Homo sapiens prostaglandin F receptor (FP) (PTGFR), transcript variant 2, mRNA [NM_001039585]	chr1:79006296-79006355	hs|1p31.1
1.67049	1.67049	0.740269	up	KRTAP12-4	keratin associated protein 12-4	Homo sapiens keratin associated protein 12-4 (KRTAP12-4), mRNA [NM_198698]	chr21:46074190-46074131	hs|21q22.3
1.67035	-1.67035	-0.740148	down	PLLP	plasmolipin	Homo sapiens plasmolipin (PLLP), mRNA [NM_015993]	chr16:57295873-57295814	hs|16q13
1.66986	-1.66986	-0.739725	down	CSMD2	CUB and Sushi multiple domains 2	Homo sapiens CUB and Sushi multiple domains 2 (CSMD2), transcript variant 2, mRNA [NM_052896]	chr1:33980537-33980478	hs|1p35.1
1.66966	1.66966	0.739553	up	LOC101805491	uncharacterized LOC101805491	Homo sapiens uncharacterized LOC101805491 (LOC101805491), long non-coding RNA [NR_103805]	chr2:46668427-46668486	hs|2p21
1.66944	1.66944	0.739366	up	LRTM2	leucine-rich repeats and transmembrane domains 2	Homo sapiens leucine-rich repeats and transmembrane domains 2 (LRTM2), transcript variant 1, mRNA [NM_001039029]	chr12:1945407-1945466	hs|12p13.33
1.66942	1.66942	0.739344	up	DNAH8	dynein, axonemal, heavy chain 8	Homo sapiens dynein, axonemal, heavy chain 8 (DNAH8), mRNA [NM_001206927]	chr6:38980339-38980398	hs|6p21.2
1.6694	1.6694	0.739331	up	TMEM221	transmembrane protein 221	Homo sapiens transmembrane protein 221 (TMEM221), mRNA [NM_001190844]	chr19:17556068-17556009	hs|19p13.11
1.66926	1.66926	0.739208	up	OR1N2	olfactory receptor, family 1, subfamily N, member 2	Homo sapiens olfactory receptor, family 1, subfamily N, member 2 (OR1N2), mRNA [NM_001004457]	chr9:125316281-125316340	hs|9q33.2
1.66905	-1.66905	-0.73903	down	ZNF783	zinc finger family member 783	Homo sapiens zinc finger family member 783 (ZNF783), mRNA [NM_001195220]	chr7:148981780-148981839	hs|7q36.1
1.66843	1.66843	0.73849	up	MYC	v-myc avian myelocytomatosis viral oncogene homolog	Homo sapiens v-myc avian myelocytomatosis viral oncogene homolog (MYC), mRNA [NM_002467]	chr8:128753268-128753327	hs|8q24.21
1.66806	1.66806	0.738174	up	POTEI	POTE ankyrin domain family, member I	Homo sapiens POTE ankyrin domain family, member I (POTEI), mRNA [NM_001277406]	chr2:131232021-131231962	hs|2q21.1
1.66801	1.66801	0.738128	up	GADL1	glutamate decarboxylase-like 1	Homo sapiens glutamate decarboxylase-like 1 (GADL1), mRNA [NM_207359]	chr3:30767791-30767732	hs|3p24.1
1.6676	1.6676	0.737772	up	FAXC	failed axon connections homolog (Drosophila)	Homo sapiens failed axon connections homolog (Drosophila) (FAXC), mRNA [NM_032511]	chr6:99727411-99727352	hs|6q16.2
1.6676	1.6676	0.73777	up	ZDHHC23	zinc finger, DHHC-type containing 23	Homo sapiens zinc finger, DHHC-type containing 23 (ZDHHC23), mRNA [NM_173570]	chr3:113677290-113677349	hs|3q13.31
1.66747	1.66747	0.73766	up	C17orf78	chromosome 17 open reading frame 78	Homo sapiens chromosome 17 open reading frame 78 (C17orf78), mRNA [NM_173625]	chr17:35749525-35749584	hs|17q12
1.66743	-1.66743	-0.737626	down	ANKRD20A2	ankyrin repeat domain 20 family, member A2	Homo sapiens ankyrin repeat domain 20 family, member A2 (ANKRD20A2), mRNA [NM_001012421]	chr9:42393542-42396400	hs|9p12
1.66739	1.66739	0.73759	up	LOC100131032	uncharacterized LOC100131032	Homo sapiens cDNA FLJ46256 fis, clone TESTI4023654. [AK128135]	chr1:210631252-210631311	hs|1q32.2
1.66734	-1.66734	-0.737549	down	PLCD3	phospholipase C, delta 3	Homo sapiens phospholipase C, delta 3 (PLCD3), mRNA [NM_133373]	chr17:43190281-43190064	hs|17q21.31
1.66713	-1.66713	-0.737364	down	MAP3K14	mitogen-activated protein kinase kinase kinase 14	Homo sapiens mitogen-activated protein kinase kinase kinase 14 (MAP3K14), mRNA [NM_003954]	chr17:43340768-43340709	hs|17q21.31
1.66686	1.66686	0.737135	up	FGA	fibrinogen alpha chain	Homo sapiens fibrinogen alpha chain (FGA), transcript variant alpha, mRNA [NM_021871]	chr4:155507307-155507248	hs|4q31.3
1.66615	-1.66615	-0.736518	down	COL5A3	collagen, type V, alpha 3	Homo sapiens collagen, type V, alpha 3 (COL5A3), mRNA [NM_015719]	chr19:10070602-10070543	hs|19p13.2
1.6661	-1.6661	-0.736475	down	EVC	Ellis van Creveld syndrome	PREDICTED: Homo sapiens Ellis van Creveld syndrome (EVC), transcript variant X11, misc_RNA [XR_427477]	chr4:5830668-5830727	hs|4p16.2
1.66608	1.66608	0.736458	up	DNAJB3	DnaJ (Hsp40) homolog, subfamily B, member 3	Homo sapiens DnaJ (Hsp40) homolog, subfamily B, member 3 (DNAJB3), mRNA [NM_001001394]	chr2:234651696-234651637	hs|2q37.1
1.66585	-1.66585	-0.736262	down	C8orf37	chromosome 8 open reading frame 37	Homo sapiens chromosome 8 open reading frame 37 (C8orf37), mRNA [NM_177965]	chr8:96258592-96258533	hs|8q22.1
1.66564	-1.66564	-0.736077	down	LOC284219	uncharacterized LOC284219	Homo sapiens cDNA FLJ37117 fis, clone BRACE2022270. [AK094436]	chr18:8767695-8767754	hs|18p11.22
1.66564	-1.66564	-0.736075	down	ABHD17B	abhydrolase domain containing 17B	Homo sapiens abhydrolase domain containing 17B (ABHD17B), transcript variant 2, mRNA [NM_001025780]	chr9:74480188-74480129	hs|9q21.13
1.66542	-1.66542	-0.735885	down	PLEKHA4	pleckstrin homology domain containing, family A (phosphoinositide binding specific) member 4	Homo sapiens pleckstrin homology domain containing, family A (phosphoinositide binding specific) member 4 (PLEKHA4), transcript variant 1, mRNA [NM_020904]	chr19:49340415-49340356	hs|19q13.33
1.66539	1.66539	0.735859	up	OR13D1	olfactory receptor, family 13, subfamily D, member 1	Homo sapiens olfactory receptor, family 13, subfamily D, member 1 (OR13D1), mRNA [NM_001004484]	chr9:107457516-107457575	hs|9q31.1
1.66537	1.66537	0.735846	up	SPRY3	sprouty homolog 3 (Drosophila)	Homo sapiens sprouty homolog 3 (Drosophila) (SPRY3), mRNA [NM_005840]	chrX:155012038-155012097	hs|Xq28
1.66522	-1.66522	-0.735713	down	ABCA8	ATP-binding cassette, sub-family A (ABC1), member 8	Homo sapiens ATP-binding cassette, sub-family A (ABC1), member 8 (ABCA8), transcript variant 2, mRNA [NM_007168]	chr17:66920902-66920843	hs|17q24.2
1.66491	-1.66491	-0.735441	down	VGLL3	vestigial-like family member 3	Homo sapiens vestigial-like family member 3 (VGLL3), mRNA [NM_016206]	chr3:86987218-86987159	hs|3p12.1
1.66488	1.66488	0.735416	up	FOXD4L5	forkhead box D4-like 5	Homo sapiens forkhead box D4-like 5 (FOXD4L5), mRNA [NM_001126334]	chr9:70175843-70175784	hs|9q21.11
1.66468	1.66468	0.735246	up	TJP3	tight junction protein 3	Homo sapiens tight junction protein 3 (TJP3), transcript variant 1, mRNA [NM_001267560]	chr19:3746516-3746575	hs|19p13.3
1.66457	-1.66457	-0.735152	down	LOC728819	hCG1645220	Homo sapiens hCG1645220 (LOC728819), mRNA [NM_001101330]	chr2:43902476-43902417	hs|2p21
1.6644	1.6644	0.735004	up	PF4V1	platelet factor 4 variant 1	Homo sapiens platelet factor 4 variant 1 (PF4V1), mRNA [NM_002620]	chr4:74720137-74720196	hs|4q13.3
1.66427	-1.66427	-0.734889	down	TTC28	tetratricopeptide repeat domain 28	Homo sapiens tetratricopeptide repeat domain 28 (TTC28), mRNA [NM_001145418]	chr22:28374426-28374367	hs|22q12.1
1.66421	1.66421	0.734841	up	SLC1A5	solute carrier family 1 (neutral amino acid transporter), member 5	Homo sapiens solute carrier family 1 (neutral amino acid transporter), member 5 (SLC1A5), transcript variant 1, mRNA [NM_005628]	chr19:47278958-47278899	hs|19q13.32
1.66421	1.66421	0.734836	up	OR4C45	olfactory receptor, family 4, subfamily C, member 45	Homo sapiens olfactory receptor, family 4, subfamily C, member 45 (OR4C45), mRNA [NM_001005513]	chr11:048367011-048366952	hs|11p11.2
1.66403	1.66403	0.734679	up	ASCL1	achaete-scute family bHLH transcription factor 1	Homo sapiens achaete-scute family bHLH transcription factor 1 (ASCL1), mRNA [NM_004316]	chr12:103353454-103353513	hs|12q23.2
1.66402	1.66402	0.734674	up	OR52I2	olfactory receptor, family 52, subfamily I, member 2	Homo sapiens olfactory receptor, family 52, subfamily I, member 2 (OR52I2), mRNA [NM_001005170]	chr11:4609036-4609095	hs|11p15.4
1.66383	1.66383	0.734512	up	NRP1	neuropilin 1	Homo sapiens neuropilin 1 (NRP1), transcript variant 1, mRNA [NM_003873]	chr10:33466995-33466936	hs|10p11.22
1.6637	-1.6637	-0.734393	down	SLC40A1	solute carrier family 40 (iron-regulated transporter), member 1	Homo sapiens solute carrier family 40 (iron-regulated transporter), member 1 (SLC40A1), mRNA [NM_014585]	chr2:190425809-190425750	hs|2q32.2
1.66366	-1.66366	-0.734358	down	SLC23A1	solute carrier family 23 (ascorbic acid transporter), member 1	Homo sapiens solute carrier family 23 (ascorbic acid transporter), member 1 (SLC23A1), transcript variant 2, mRNA [NM_152685]	chr5:138707745-138707686	hs|5q31.2
1.66355	1.66355	0.734262	up	ESR2	estrogen receptor 2 (ER beta)	Homo sapiens estrogen receptor 2 (ER beta) (ESR2), transcript variant g, mRNA [NM_001271877]	chr14:64735617-64735558	hs|14q23.2
1.66279	-1.66279	-0.733609	down	NINL	ninein-like	Homo sapiens ninein-like (NINL), mRNA [NM_025176]	chr20:25442259-25442200	hs|20p11.21
1.66273	1.66273	0.733556	up	HBG1	hemoglobin, gamma A	Homo sapiens hemoglobin, gamma A (HBG1), mRNA [NM_000559]	chr11:5269593-5269534	hs|11p15.4
1.66254	1.66254	0.733387	up	DPEP1	dipeptidase 1 (renal)	Homo sapiens dipeptidase 1 (renal) (DPEP1), transcript variant 1, mRNA [NM_004413]	chr16:89703894-89703953	hs|16q24.3
1.6624	-1.6624	-0.733265	down	lnc-GCNT2-2	lnc-GCNT2-2:2	Homo sapiens, clone IMAGE:3863392, mRNA. [BC012200]	chr6:10414906-10414965	hs|6p24.3
1.66194	-1.66194	-0.732872	down	LOC101929523	uncharacterized LOC101929523	PREDICTED: Homo sapiens uncharacterized LOC101929523 (LOC101929523), ncRNA [XR_252136]	chr6:169614706-169614765	hs|6q27
1.66191	-1.66191	-0.73284	down	ITM2C	integral membrane protein 2C	Homo sapiens integral membrane protein 2C (ITM2C), transcript variant 1, mRNA [NM_030926]	chr2:231743882-231743941	hs|2q37.1
1.66162	1.66162	0.732589	up	NPTXR	neuronal pentraxin receptor	Homo sapiens neuronal pentraxin receptor (NPTXR), mRNA [NM_014293]	chr22:39215222-39215163	hs|22q13.1
1.66145	1.66145	0.732441	up	FAM138D	family with sequence similarity 138, member D	family with sequence similarity 138, member D [Source:EntrezGene;Acc:677784] [ENST00000546223]	chr12:68505-68564	hs|12p13.33
1.66125	-1.66125	-0.732273	down	TNFAIP8L2	tumor necrosis factor, alpha-induced protein 8-like 2	Homo sapiens tumor necrosis factor, alpha-induced protein 8-like 2 (TNFAIP8L2), mRNA [NM_024575]	chr1:151131973-151132032	hs|1q21.3
1.66111	1.66111	0.732147	up	PPAP2C	phosphatidic acid phosphatase type 2C	Homo sapiens phosphatidic acid phosphatase type 2C (PPAP2C), transcript variant 3, mRNA [NM_177543]	chr19:282253-282194	hs|19p13.3
1.66103	1.66103	0.732075	up	FSIP2	fibrous sheath interacting protein 2	Homo sapiens fibrous sheath interacting protein 2 (FSIP2), mRNA [NM_173651]	chr2:186673293-186673352	hs|2q32.1
1.6608	-1.6608	-0.731876	down	ASB14	ankyrin repeat and SOCS box containing 14	Homo sapiens ankyrin repeat and SOCS box containing 14 (ASB14), transcript variant 1, mRNA [NM_001142733]	chr3:57302561-57302502	hs|3p14.3
1.66078	1.66078	0.73186	up	PANX2	pannexin 2	Homo sapiens pannexin 2 (PANX2), transcript variant 1, mRNA [NM_052839]	chr22:50617648-50617707	hs|22q13.33
1.66059	-1.66059	-0.731699	down	THOC6	THO complex 6 homolog (Drosophila)	Homo sapiens THO complex 6 homolog (Drosophila) (THOC6), transcript variant 1, mRNA [NM_024339]	chr16:3076557-3076707	hs|16p13.3
1.66054	1.66054	0.73165	up	LINC01524	long intergenic non-protein coding RNA 1524	Homo sapiens long intergenic non-protein coding RNA 1524 (LINC01524), long non-coding RNA [NR_110038]	chr20:51266520-51266579	hs|20q13.2
1.66032	1.66032	0.731461	up	TLL2	tolloid-like 2	Homo sapiens tolloid-like 2 (TLL2), mRNA [NM_012465]	chr10:98125121-98125062	hs|10q24.1
1.66025	-1.66025	-0.7314	down	ATP7A	ATPase, Cu++ transporting, alpha polypeptide	Homo sapiens ATPase, Cu++ transporting, alpha polypeptide (ATP7A), transcript variant 1, mRNA [NM_000052]	chrX:77305601-77305657	hs|Xq21.1
1.6597	1.6597	0.730926	up	PLAU	plasminogen activator, urokinase	Homo sapiens plasminogen activator, urokinase (PLAU), transcript variant 2, mRNA [NM_001145031]	chr10:75674614-75674673	hs|10q22.2
1.65938	1.65938	0.730645	up	MTHFD2P1	methylenetetrahydrofolate dehydrogenase (NADP+ dependent) 2, methenyltetrahydrofolate cyclohydrolase pseudogene 1	Homo sapiens methylenetetrahydrofolate dehydrogenase (NADP+ dependent) 2, methenyltetrahydrofolate cyclohydrolase pseudogene 1 (MTHFD2P1), non-coding RNA [NR_077228]	chr3:95373490-95373431	hs|3q11.2
1.659	-1.659	-0.730315	down	GRIN2A	glutamate receptor, ionotropic, N-methyl D-aspartate 2A	glutamate receptor, ionotropic, N-methyl D-aspartate 2A [Source:HGNC Symbol;Acc:HGNC:4585] [ENST00000566665]	chr16:10273875-10273816	hs|16p13.2
1.65886	1.65886	0.730193	up	IARS	isoleucyl-tRNA synthetase	Homo sapiens isoleucyl-tRNA synthetase (IARS), transcript variant 2, mRNA [NM_013417]	chr9:94972930-94972871	hs|9q22.31
1.65883	1.65883	0.730162	up	APBB1IP	amyloid beta (A4) precursor protein-binding, family B, member 1 interacting protein	Homo sapiens amyloid beta (A4) precursor protein-binding, family B, member 1 interacting protein (APBB1IP), mRNA [NM_019043]	chr10:26856519-26856578	hs|10p12.1
1.65878	-1.65878	-0.730119	down	KDM4C	lysine (K)-specific demethylase 4C	lysine (K)-specific demethylase 4C [Source:HGNC Symbol;Acc:HGNC:17071] [ENST00000381306]	chr9:7170372-7170431	hs|9p24.1
1.65872	-1.65872	-0.730073	down	TSPAN11	tetraspanin 11	Homo sapiens tetraspanin 11 (TSPAN11), mRNA [NM_001080509]	chr12:31149400-31149459	hs|12p11.21
1.65868	-1.65868	-0.730038	down	CD4	CD4 molecule	CD4 molecule [Source:HGNC Symbol;Acc:HGNC:1678] [ENST00000544344]	chr12:6924108-6924167	hs|12p13.31
1.65849	1.65849	0.729873	up	CTLA4	cytotoxic T-lymphocyte-associated protein 4	Homo sapiens cytotoxic T-lymphocyte-associated protein 4 (CTLA4), transcript variant 1, mRNA [NM_005214]	chr2:204737668-204737727	hs|2q33.2
1.65846	1.65846	0.729848	up	OR10C1	olfactory receptor, family 10, subfamily C, member 1 (gene/pseudogene)	Homo sapiens olfactory receptor, family 10, subfamily C, member 1 (gene/pseudogene) (OR10C1), mRNA [NM_013941]	chr6:29408300-29408359	hs|6p22.1
1.65833	-1.65833	-0.729735	down	ADA	adenosine deaminase	Homo sapiens adenosine deaminase (ADA), mRNA [NM_000022]	chr20:43248250-43248191	hs|20q13.12
1.65832	1.65832	0.72972	up	SOHLH1	spermatogenesis and oogenesis specific basic helix-loop-helix 1	Homo sapiens spermatogenesis and oogenesis specific basic helix-loop-helix 1 (SOHLH1), transcript variant 2, mRNA [NM_001012415]	chr9:138585325-138585266	hs|9q34.3
1.658	1.658	0.729444	up	PDE4D	phosphodiesterase 4D, cAMP-specific	Homo sapiens phosphodiesterase 4D, cAMP-specific (PDE4D), transcript variant 3, mRNA [NM_001165899]	chr5:58270613-58270554	hs|5q11.2
1.65782	1.65782	0.729286	up	HERC5	HECT and RLD domain containing E3 ubiquitin protein ligase 5	Homo sapiens HECT and RLD domain containing E3 ubiquitin protein ligase 5 (HERC5), mRNA [NM_016323]	chr4:89426889-89426948	hs|4q22.1
1.6577	1.6577	0.729179	up	KNCN	kinocilin	Homo sapiens kinocilin (KNCN), mRNA [NM_001097611]	chr1:47011724-47011665	hs|1p33
1.65747	-1.65747	-0.728979	down	OPA3	optic atrophy 3 (autosomal recessive, with chorea and spastic paraplegia)	Homo sapiens optic atrophy 3 (autosomal recessive, with chorea and spastic paraplegia) (OPA3), transcript variant 1, mRNA [NM_001017989]	chr19:46031086-46031027	hs|19q13.32
1.6572	1.6572	0.728751	up	OAS2	2'-5'-oligoadenylate synthetase 2, 69/71kDa	Homo sapiens 2'-5'-oligoadenylate synthetase 2, 69/71kDa (OAS2), transcript variant 2, mRNA [NM_002535]	chr12:113448429-113448488	hs|12q24.13
1.65711	1.65711	0.72867	up	S100A8	S100 calcium binding protein A8	Homo sapiens S100 calcium binding protein A8 (S100A8), mRNA [NM_002964]	chr1:153362607-153362548	hs|1q21.3
1.65705	1.65705	0.72862	up	CALCA	calcitonin-related polypeptide alpha	Homo sapiens calcitonin-related polypeptide alpha (CALCA), transcript variant 2, mRNA [NM_001033952]	chr11:14990432-14990373	hs|11p15.2
1.65671	-1.65671	-0.728325	down	PAXIP1-AS2	PAXIP1 antisense RNA 2	Homo sapiens, clone IMAGE:5745756, mRNA. [BC050402]	chr7:154737030-154737088	hs|7q36.2
1.65623	-1.65623	-0.727902	down	SMCR6	Smith-Magenis syndrome chromosome region, candidate 6 (non-protein coding)	Homo sapiens mRNA; cDNA DKFZp686J19223 (from clone DKFZp686J19223). [BX647090]	chr17:17729676-17729617	hs|17p11.2
1.65609	1.65609	0.727777	up	GDNF	glial cell derived neurotrophic factor	Homo sapiens glial cell derived neurotrophic factor (GDNF), transcript variant 1, mRNA [NM_000514]	chr5:37816024-37815965	hs|5p13.2
1.6559	1.6559	0.727618	up	PGM5P4-AS1	PGM5P4 antisense RNA 1	Homo sapiens PGM5P4 antisense RNA 1 (PGM5P4-AS1), transcript variant 1, long non-coding RNA [NR_121185]	chr2:114286564-114286505	hs|2q13
1.65575	1.65575	0.727489	up	FABP9	fatty acid binding protein 9, testis	Homo sapiens fatty acid binding protein 9, testis (FABP9), mRNA [NM_001080526]	chr8:82370909-82370850	hs|8q21.13
1.65548	1.65548	0.727246	up	lnc-SLC39A7-2	lnc-SLC39A7-2:1	LNCipedia lincRNA (lnc-SLC39A7-2), lincRNA [lnc-SLC39A7-2:1]	chr6:33115482-33115541	hs|6p21.32
1.65459	-1.65459	-0.726473	down	FAM206A	family with sequence similarity 206, member A	family with sequence similarity 206, member A [Source:HGNC Symbol;Acc:HGNC:1364] [ENST00000374624]	chr9:111712804-111712863	hs|9q31.3
1.65446	-1.65446	-0.726361	down	SESTD1	SEC14 and spectrin domains 1	Homo sapiens SEC14 and spectrin domains 1 (SESTD1), mRNA [NM_178123]	chr2:179973718-179973659	hs|2q31.2
1.65427	1.65427	0.726191	up	EDAR	ectodysplasin A receptor	Homo sapiens ectodysplasin A receptor (EDAR), mRNA [NM_022336]	chr2:109511689-109511630	hs|2q12.3
1.65416	1.65416	0.726098	up	PLEKHG4B	pleckstrin homology domain containing, family G (with RhoGef domain) member 4B	Homo sapiens pleckstrin homology domain containing, family G (with RhoGef domain) member 4B (PLEKHG4B), mRNA [NM_052909]	chr5:182635-182694	hs|5p15.33
1.65401	-1.65401	-0.725966	down	ATG16L2	autophagy related 16-like 2 (S. cerevisiae)	Homo sapiens autophagy related 16-like 2 (S. cerevisiae) (ATG16L2), mRNA [NM_033388]	chr11:72540556-72540615	hs|11q13.4
1.6539	-1.6539	-0.72587	down	KIAA1731NL	KIAA1731 N-terminal like	Homo sapiens KIAA1731 N-terminal like (KIAA1731NL), transcript variant 1, mRNA [NM_001243541]	chr17:76887029-76886970	hs|17q25.3
1.65384	-1.65384	-0.725824	down	BICC1	BicC family RNA binding protein 1	BicC family RNA binding protein 1 [Source:HGNC Symbol;Acc:HGNC:19351] [ENST00000263103]	chr10:60573780-60573839	hs|10q21.1
1.65382	-1.65382	-0.725801	down	TMEM119	transmembrane protein 119	Homo sapiens transmembrane protein 119 (TMEM119), mRNA [NM_181724]	chr12:108983690-108983631	hs|12q23.3
1.65356	1.65356	0.725573	up	PCDH15	protocadherin-related 15	Homo sapiens protocadherin-related 15 (PCDH15), transcript variant J, mRNA [NM_001142770]	chr10:55568511-55568452	hs|10q21.1
1.65355	1.65355	0.725568	up	KRTAP13-2	keratin associated protein 13-2	Homo sapiens keratin associated protein 13-2 (KRTAP13-2), mRNA [NM_181621]	chr21:31744070-31744011	hs|21q22.11
1.65355	-1.65355	-0.725566	down	CCDC107	coiled-coil domain containing 107	Homo sapiens coiled-coil domain containing 107 (CCDC107), transcript variant A, mRNA [NM_174923]	chr9:35661115-35661174	hs|9p13.3
1.65314	-1.65314	-0.725207	down	ARL4A	ADP-ribosylation factor-like 4A	Homo sapiens ADP-ribosylation factor-like 4A (ARL4A), transcript variant 1, mRNA [NM_005738]	chr7:12728281-12728340	hs|7p21.3
1.65305	1.65305	0.725127	up	CTNNA3	catenin (cadherin-associated protein), alpha 3	Homo sapiens catenin (cadherin-associated protein), alpha 3 (CTNNA3), transcript variant 1, mRNA [NM_013266]	chr10:67680316-67680257	hs|10q21.3
1.65284	1.65284	0.724945	up	FAM72D	family with sequence similarity 72, member D	Homo sapiens family with sequence similarity 72, member D (FAM72D), mRNA [NM_207418]	chr1:143897200-143897141	hs|1q21.1
1.6528	1.6528	0.724915	up	GRK1	G protein-coupled receptor kinase 1	Homo sapiens G protein-coupled receptor kinase 1 (GRK1), mRNA [NM_002929]	chr13:114324024-114324083	hs|13q34
1.65212	1.65212	0.72432	up	OR10G2	olfactory receptor, family 10, subfamily G, member 2	Homo sapiens olfactory receptor, family 10, subfamily G, member 2 (OR10G2), mRNA [NM_001005466]	chr14:22102159-22102100	hs|14q11.2
[truncated: 24,735 more rows]

## Sheet: DEGs of lncRNA
FC (abs) [S7] vs [G7]	FC [S7] vs [G7]	Log FC [S7] vs [G7]	Regulation [S7] vs [G7]	gene	description	known lncRNA name	class	length
5.94783	-5.94783	-2.57236	down	ENSG00000238274.2	gene_id "ENSG00000238274.2"; transcript_id "ENST00000444265.1"; gene_type "lincRNA"; gene_status "NOVEL"; gene_name "LINC00340"; transcript_type "lincRNA"; transcript_status "KNOWN"; transcript_name "LINC00340-001"; level 2; tag "basic"; havana_gene "OTTHUMG00000014345.1"; havana_transcript "OTTHUMT00000039992.1";	LINC00340	Intergenic	327
5.21098	5.21098	2.38156	up	ENSG00000240476.1	gene_id "ENSG00000240476.1"; transcript_id "ENST00000473756.1"; gene_type "lincRNA"; gene_status "NOVEL"; gene_name "CTD-2021J15.2"; transcript_type "lincRNA"; transcript_status "KNOWN"; transcript_name "CTD-2021J15.2-001"; level 2; tag "basic"; havana_gene "OTTHUMG00000159060.1"; havana_transcript "OTTHUMT00000353102.1";	CTD-2021J15.2	Intergenic	962
4.73519	-4.73519	-2.24342	down	ENSG00000248890.1	gene_id "ENSG00000248890.1"; transcript_id "ENST00000508269.1"; gene_type "processed_transcript"; gene_status "NOVEL"; gene_name "HHIP-AS1"; transcript_type "processed_transcript"; transcript_status "KNOWN"; transcript_name "HHIP-AS1-002"; level 2; tag "basic"; havana_gene "OTTHUMG00000161429.1"; havana_transcript "OTTHUMT00000364894.1";	HHIP-AS1	Divergent	1094
4.48157	-4.48157	-2.164	down	ENSG00000224189.2	gene_id "ENSG00000224189.2"; transcript_id "ENST00000417086.1"; gene_type "processed_transcript"; gene_status "NOVEL"; gene_name "HOXD-AS1"; transcript_type "antisense"; transcript_status "KNOWN"; transcript_name "HOXD-AS1-003"; level 2; tag "basic"; havana_gene "OTTHUMG00000154172.2"; havana_transcript "OTTHUMT00000334219.1";	HOXD-AS1	Antisense	984
3.89391	3.89391	1.96122	up	ENSG00000246334.2	gene_id "ENSG00000246334.2"; transcript_id "ENST00000514846.1"; gene_type "processed_transcript"; gene_status "NOVEL"; gene_name "PRR7-AS1"; transcript_type "processed_transcript"; transcript_status "KNOWN"; transcript_name "PRR7-AS1-004"; level 2; havana_gene "OTTHUMG00000163400.1"; havana_transcript "OTTHUMT00000373189.1";	PRR7-AS1	Antisense	543
3.88097	-3.88097	-1.95642	down	ENSG00000012171.13	gene_id "ENSG00000012171.13"; transcript_id "ENST00000434030.1"; gene_type "processed_transcript"; gene_status "KNOWN"; gene_name "SEMA3B"; transcript_type "retained_intron"; transcript_status "KNOWN"; transcript_name "SEMA3B-013"; level 2; havana_gene "OTTHUMG00000156970.2"; havana_transcript "OTTHUMT00000346902.1";	SEMA3B	Antisense	1011
3.83256	-3.83256	-1.93831	down	ENSG00000225783.2	gene_id "ENSG00000225783.2"; transcript_id "ENST00000425476.1"; gene_type "processed_transcript"; gene_status "KNOWN"; gene_name "MIAT"; transcript_type "processed_transcript"; transcript_status "KNOWN"; transcript_name "MIAT-013"; level 2; havana_gene "OTTHUMG00000150985.2"; havana_transcript "OTTHUMT00000320808.1";	MIAT	Intergenic	567
3.8204	-3.8204	-1.93372	down	ENSG00000231231.1	gene_id "ENSG00000231231.1"; transcript_id "ENST00000414189.1"; gene_type "lincRNA"; gene_status "NOVEL"; gene_name "AP001422.3"; transcript_type "lincRNA"; transcript_status "KNOWN"; transcript_name "AP001422.3-002"; level 2; tag "basic"; havana_gene "OTTHUMG00000090768.1"; havana_transcript "OTTHUMT00000207543.1";	AP001422.3	Intergenic	608
3.76105	-3.76105	-1.91113	down	ENSG00000099869.6	gene_id "ENSG00000099869.6"; transcript_id "ENST00000381361.3"; gene_type "antisense"; gene_status "KNOWN"; gene_name "IGF2-AS"; transcript_type "antisense"; transcript_status "KNOWN"; transcript_name "IGF2-AS-001"; level 2; tag "basic"; havana_gene "OTTHUMG00000009557.4"; havana_transcript "OTTHUMT00000026390.4";	IGF2-AS	Antisense	2061
3.73778	-3.73778	-1.90218	down	ENSG00000228109.1	gene_id "ENSG00000228109.1"; transcript_id "ENST00000424769.1"; gene_type "antisense"; gene_status "NOVEL"; gene_name "MFI2-AS1"; transcript_type "antisense"; transcript_status "KNOWN"; transcript_name "MFI2-AS1-002"; level 1; tag "basic"; tag "exp_conf"; havana_gene "OTTHUMG00000155519.1"; havana_transcript "OTTHUMT00000340466.1";	MFI2-AS1	Antisense	356
3.67395	3.67395	1.87733	up	ENSG00000227136.2	gene_id "ENSG00000227136.2"; transcript_id "ENST00000459633.1"; gene_type "lincRNA"; gene_status "KNOWN"; gene_name "LINC00595"; transcript_type "lincRNA"; transcript_status "KNOWN"; transcript_name "LINC00595-004"; level 2; havana_gene "OTTHUMG00000018552.2"; havana_transcript "OTTHUMT00000048931.1";	LINC00595	Intergenic	548
3.61921	3.61921	1.85567	up	ENSG00000267094.1	gene_id "ENSG00000267094.1"; transcript_id "ENST00000593211.1"; gene_type "lincRNA"; gene_status "NOVEL"; gene_name "CTC-360P9.5"; transcript_type "lincRNA"; transcript_status "KNOWN"; transcript_name "CTC-360P9.5-001"; level 2; tag "basic"; havana_gene "OTTHUMG00000180563.1"; havana_transcript "OTTHUMT00000451919.1";	CTC-360P9.5	Intergenic	570
3.47747	3.47747	1.79804	up	ENSG00000258791.2	gene_id "ENSG00000258791.2"; transcript_id "ENST00000560267.1"; gene_type "processed_transcript"; gene_status "NOVEL"; gene_name "LINC00520"; transcript_type "processed_transcript"; transcript_status "KNOWN"; transcript_name "LINC00520-005"; level 2; havana_gene "OTTHUMG00000171059.2"; havana_transcript "OTTHUMT00000416947.1";	LINC00520	Intergenic	412
3.454	-3.454	-1.78827	down	ENSG00000231231.1	gene_id "ENSG00000231231.1"; transcript_id "ENST00000436845.1"; gene_type "lincRNA"; gene_status "NOVEL"; gene_name "AP001422.3"; transcript_type "lincRNA"; transcript_status "KNOWN"; transcript_name "AP001422.3-001"; level 2; havana_gene "OTTHUMG00000090768.1"; havana_transcript "OTTHUMT00000207542.1";	AP001422.3	Intergenic	423
3.27753	-3.27753	-1.71261	down	ENSG00000255438.2	gene_id "ENSG00000255438.2"; transcript_id "ENST00000526566.2"; gene_type "antisense"; gene_status "NOVEL"; gene_name "CTD-2653D5.1"; transcript_type "antisense"; transcript_status "KNOWN"; transcript_name "CTD-2653D5.1-001"; level 2; tag "dotter_confirmed"; tag "basic"; havana_gene "OTTHUMG00000167583.2"; havana_transcript "OTTHUMT00000395183.2";	CTD-2653D5.1	Antisense	2437
3.16361	-3.16361	-1.66157	down	ENSG00000243197.2	gene_id "ENSG00000243197.2"; transcript_id "ENST00000466156.1"; gene_type "antisense"; gene_status "NOVEL"; gene_name "LSAMP-AS3"; transcript_type "antisense"; transcript_status "KNOWN"; transcript_name "LSAMP-AS3-006"; level 2; tag "basic"; havana_gene "OTTHUMG00000159329.4"; havana_transcript "OTTHUMT00000354804.1";	LSAMP-AS3	Antisense	1054
3.13205	-3.13205	-1.64711	down	ENSG00000229228.1	gene_id "ENSG00000229228.1"; transcript_id "ENST00000448058.1"; gene_type "antisense"; gene_status "NOVEL"; gene_name "LINC00582"; transcript_type "antisense"; transcript_status "KNOWN"; transcript_name "LINC00582-001"; level 2; tag "basic"; havana_gene "OTTHUMG00000039488.1"; havana_transcript "OTTHUMT00000095276.1";	LINC00582	Antisense	597
[truncated: 5,072 more rows]
